# Supplementary material for: Transcriptomic Analysis of the Salivary Glands of an Invasive Whitefly
Source: PLoS One. 2012 Jun 20;7(6):e39303. doi: 10.1371/journal.pone.0039303 (PMC3379992; doi:10.1371/journal.pone.0039303)
Supplement: Table S1 — Top BLAST hits from NCBI nr database. BLAST results against the NCBI nr database for all the unigenes with a cut-off E-value <1.0E−5 are shown. (XLS) [file pone.0039303.s002.xls]

geneID	Nr-ID	Nr-Evalue	Nr-annotation
BT_Q_SG_ZJU_Unigene1	gi|149408889|ref|XP_001507365.1|	7.00E-18	PREDICTED: similar to elongation factor-1 alpha [Ornithorhynchus anatinus]
BT_Q_SG_ZJU_Unigene6	gi|189237512|ref|XP_972880.2|	3.00E-55	PREDICTED: similar to protein phosphatase type 2c [Tribolium castaneum]
BT_Q_SG_ZJU_Unigene10	gi|5729802|ref|NP_006692.1|	1.00E-71	thioredoxin-like protein 4A [Homo sapiens] >gi|13384656|ref|NP_079575.1| thioredoxin-like protein 4A isoform a [Mus musculus] >gi|109122568|ref|XP_001089626.1| PREDICTED: thioredoxin-like 4A [Macaca mulatta] >gi|296222921|ref|XP_002757397.1| PREDICTED: thioredoxin-like protein 4A-like [Callithrix jacchus] >gi|46577662|sp|P83876.1|TXN4A_HUMAN RecName: Full=Thioredoxin-like protein 4A; AltName: Ful…
BT_Q_SG_ZJU_Unigene19	gi|48097602|ref|XP_391919.1|	7.00E-69	PREDICTED: similar to TM2 domain containing 2 isoform a [Apis mellifera]
BT_Q_SG_ZJU_Unigene21	gi|170028257|ref|XP_001842012.1|	3.00E-06	conserved hypothetical protein [Culex quinquefasciatus] >gi|167874167|gb|EDS37550.1| conserved hypothetical protein [Culex quinquefasciatus]
BT_Q_SG_ZJU_Unigene32	gi|91078482|ref|XP_975769.1|	8.00E-24	PREDICTED: similar to AGAP006099-PA isoform 2 [Tribolium castaneum]
BT_Q_SG_ZJU_Unigene37	gi|40365371|gb|AAR85358.1|	8.00E-14	angiotensin converting enzyme [Locusta migratoria]
BT_Q_SG_ZJU_Unigene44	gi|71413210|ref|XP_808755.1|	3.00E-08	mucin-associated surface protein (MASP) [Trypanosoma cruzi strain CL Brener]
BT_Q_SG_ZJU_Unigene51	gi|156545002|ref|XP_001608116.1|	2.00E-17	PREDICTED: similar to dolichyl-diphosphooligosaccharide protein glycotransferase [Nasonia vitripennis]
BT_Q_SG_ZJU_Unigene53	gi|193676572|ref|XP_001950729.1|	2.00E-32	PREDICTED: similar to dolichyl-diphosphooligosaccharide protein glycotransferase [Acyrthosiphon pisum]
BT_Q_SG_ZJU_Unigene62	gi|157133637|ref|XP_001662952.1|	6.00E-22	bifunctional purine biosynthesis protein [Aedes aegypti] >gi|108870755|gb|EAT34980.1| bifunctional purine biosynthesis protein [Aedes aegypti]
BT_Q_SG_ZJU_Unigene70	gi|180805|gb|AAA52035.1|	4.00E-43	mutant alpha-1 collagen type 1 [Homo sapiens]
BT_Q_SG_ZJU_Unigene77	gi|225710300|gb|ACO10996.1|	5.00E-06	3-oxoacyl-acyl-carrier-protein reductase [Caligus rogercresseyi]
BT_Q_SG_ZJU_Unigene82	gi|291221303|ref|XP_002730661.1|	1.00E-28	PREDICTED: fibrillarin-like [Saccoglossus kowalevskii]
BT_Q_SG_ZJU_Unigene85	gi|193657026|ref|XP_001944099.1|	4.00E-23	PREDICTED: similar to CG10399 CG10399-PA isoform 1 [Acyrthosiphon pisum]
BT_Q_SG_ZJU_Unigene94	gi|189240801|ref|XP_968845.2|	1.00E-08	PREDICTED: similar to rac-gtp binding protein [Tribolium castaneum]
BT_Q_SG_ZJU_Unigene95	gi|239788704|dbj|BAH71020.1|	7.00E-19	ACYPI009403 [Acyrthosiphon pisum]
BT_Q_SG_ZJU_Unigene96	gi|157131371|ref|XP_001662217.1|	6.00E-18	na+/k+ atpase alpha subunit [Aedes aegypti] >gi|108871576|gb|EAT35801.1| na+/k+ atpase alpha subunit [Aedes aegypti]
BT_Q_SG_ZJU_Unigene98	gi|110757625|ref|XP_623620.2|	1.00E-12	PREDICTED: similar to Syntaxin 13 CG11278-PA [Apis mellifera]
BT_Q_SG_ZJU_Unigene100	gi|148689408|gb|EDL21355.1|	6.00E-08	mCG142123 [Mus musculus]
BT_Q_SG_ZJU_Unigene102	gi|110750768|ref|XP_394822.3|	7.00E-41	PREDICTED: similar to lethal (1) G0168 CG33206-PA, isoform A [Apis mellifera]
BT_Q_SG_ZJU_Unigene103	gi|28140804|gb|AAO26328.1|	2.00E-13	DNA-damage-inducible-like protein [Paramecium aurelia]
BT_Q_SG_ZJU_Unigene109	gi|91084565|ref|XP_973665.1|	3.00E-25	PREDICTED: similar to light protein [Tribolium castaneum]
BT_Q_SG_ZJU_Unigene113	gi|291244539|ref|XP_002742151.1|	8.00E-29	PREDICTED: NADH Ubiquinone Oxidoreductase family member (nuo-5)-like [Saccoglossus kowalevskii]
BT_Q_SG_ZJU_Unigene115	gi|193610574|ref|XP_001947676.1|	3.00E-93	PREDICTED: similar to RUN domain-containing protein 1 [Acyrthosiphon pisum]
BT_Q_SG_ZJU_Unigene116	gi|189237647|ref|XP_001813022.1|	3.00E-07	PREDICTED: similar to CG12333 CG12333-PA [Tribolium castaneum]
BT_Q_SG_ZJU_Unigene117	gi|225719620|gb|ACO15656.1|	5.00E-06	Acetyl-CoA acetyltransferase [Caligus clemensi]
BT_Q_SG_ZJU_Unigene118	gi|66529891|ref|XP_623371.1|	3.00E-15	PREDICTED: similar to SNF1A/AMP-activated protein kinase CG3051-PA, isoform A isoform 2 [Apis mellifera] >gi|66529894|ref|XP_393081.2| PREDICTED: similar to SNF1A/AMP-activated protein kinase CG3051-PA, isoform A isoform 1 [Apis mellifera]
BT_Q_SG_ZJU_Unigene120	gi|196018528|ref|XP_002118826.1|	7.00E-09	hypothetical protein TRIADDRAFT_62830 [Trichoplax adhaerens] >gi|190578093|gb|EDV18688.1| hypothetical protein TRIADDRAFT_62830 [Trichoplax adhaerens]
BT_Q_SG_ZJU_Unigene122	gi|193713938|ref|XP_001946802.1|	7.00E-30	PREDICTED: similar to AGAP004352-PA [Acyrthosiphon pisum]
BT_Q_SG_ZJU_Unigene125	gi|156316955|ref|XP_001618013.1|	4.00E-07	hypothetical protein NEMVEDRAFT_v1g225592 [Nematostella vectensis] >gi|156196974|gb|EDO25913.1| predicted protein [Nematostella vectensis]
BT_Q_SG_ZJU_Unigene129	gi|195450985|ref|XP_002072718.1|	4.00E-16	GK13537 [Drosophila willistoni] >gi|194168803|gb|EDW83704.1| GK13537 [Drosophila willistoni]
BT_Q_SG_ZJU_Unigene131	gi|224076136|ref|XP_002193343.1|	2.00E-19	PREDICTED: RAB, member RAS oncogene family-like 5 [Taeniopygia guttata]
BT_Q_SG_ZJU_Unigene136	gi|198461904|ref|XP_001352266.2|	1.00E-25	GA18613 [Drosophila pseudoobscura pseudoobscura] >gi|198142482|gb|EAL29304.2| GA18613 [Drosophila pseudoobscura pseudoobscura]
BT_Q_SG_ZJU_Unigene140	gi|12034854|gb|AAG46031.1|AF309637_1	3.00E-16	6-phospho-beta-glucosidase-like protein [Leishmania infantum]
BT_Q_SG_ZJU_Unigene144	gi|221124266|ref|XP_002159725.1|	2.00E-21	PREDICTED: similar to Temporarily Assigned Gene name family member (tag-210) [Hydra magnipapillata]
BT_Q_SG_ZJU_Unigene145	gi|17508823|ref|NP_491245.1|	1.00E-08	PhosphoGlycerate Kinase family member (pgk-1) [Caenorhabditis elegans] >gi|2499493|sp|P91427.1|PGK_CAEEL RecName: Full=Probable phosphoglycerate kinase >gi|1825605|gb|AAB42230.1| Phosphoglycerate kinase protein 1 [Caenorhabditis elegans]
BT_Q_SG_ZJU_Unigene147	gi|91081353|ref|XP_971021.1|	1.00E-16	PREDICTED: similar to AGAP004464-PA [Tribolium castaneum]
BT_Q_SG_ZJU_Unigene150	gi|121543931|gb|ABM55630.1|	2.00E-07	macrophage migration inhibitory factor-like protein [Maconellicoccus hirsutus]
BT_Q_SG_ZJU_Unigene151	gi|62752841|ref|NP_001015788.1|	1.00E-08	acyl-CoA dehydrogenase family, member 9 [Xenopus (Silurana) tropicalis] >gi|58477081|gb|AAH89733.1| MGC108374 protein [Xenopus (Silurana) tropicalis]
BT_Q_SG_ZJU_Unigene153	gi|301763078|ref|XP_002916957.1|	3.00E-23	PREDICTED: geranylgeranyl transferase type-2 subunit beta-like [Ailuropoda melanoleuca]
BT_Q_SG_ZJU_Unigene156	gi|157111277|ref|XP_001651466.1|	9.00E-70	bifunctional aminoacyl-tRNA synthetase [Aedes aegypti] >gi|108878460|gb|EAT42685.1| bifunctional aminoacyl-tRNA synthetase [Aedes aegypti]
BT_Q_SG_ZJU_Unigene157	gi|119581483|gb|EAW61079.1|	4.00E-22	peptidylprolyl isomerase A-like, isoform CRA_b [Homo sapiens]
BT_Q_SG_ZJU_Unigene158	gi|239790293|dbj|BAH71717.1|	1.00E-09	ACYPI007196 [Acyrthosiphon pisum]
BT_Q_SG_ZJU_Unigene160	gi|110759281|ref|XP_624344.2|	8.00E-11	PREDICTED: similar to CG31126-PA [Apis mellifera]
BT_Q_SG_ZJU_Unigene162	gi|66506890|ref|XP_395059.2|	4.00E-26	PREDICTED: similar to SMC1 CG6057-PA isoform 1 [Apis mellifera]
BT_Q_SG_ZJU_Unigene167	gi|301632629|ref|XP_002945384.1|	3.00E-06	PREDICTED: uncharacterized protein y4lL-like, partial [Xenopus (Silurana) tropicalis]
BT_Q_SG_ZJU_Unigene172	gi|193591959|ref|XP_001947318.1|	1.00E-23	PREDICTED: similar to AGAP006719-PA [Acyrthosiphon pisum]
BT_Q_SG_ZJU_Unigene174	gi|193683357|ref|XP_001950668.1|	5.00E-27	PREDICTED: similar to CG8067 CG8067-PA [Acyrthosiphon pisum]
BT_Q_SG_ZJU_Unigene178	gi|157130314|ref|XP_001661885.1|	7.00E-09	DEAD box ATP-dependent RNA helicase [Aedes aegypti] >gi|108871945|gb|EAT36170.1| DEAD box ATP-dependent RNA helicase [Aedes aegypti]
BT_Q_SG_ZJU_Unigene181	gi|156551583|ref|XP_001602110.1|	1.00E-63	PREDICTED: similar to GA18560-PA [Nasonia vitripennis]
BT_Q_SG_ZJU_Unigene185	gi|193664638|ref|XP_001947746.1|	3.00E-29	PREDICTED: similar to coatomer protein complex, subunit beta 2 (beta prime) [Acyrthosiphon pisum]
BT_Q_SG_ZJU_Unigene192	gi|70940528|ref|XP_740668.1|	2.00E-06	phospholipase [Plasmodium chabaudi chabaudi]
BT_Q_SG_ZJU_Unigene193	gi|193645752|ref|XP_001952529.1|	3.00E-21	PREDICTED: similar to Arsenical pump membrane protein, partial [Acyrthosiphon pisum]
BT_Q_SG_ZJU_Unigene195	gi|239790198|dbj|BAH71675.1|	1.00E-29	ACYPI004968 [Acyrthosiphon pisum]
BT_Q_SG_ZJU_Unigene196	gi|197210433|gb|ACH48223.1|	1.00E-08	tumor differentially expressed protein [Ornithoctonus huwena]
BT_Q_SG_ZJU_Unigene200	gi|158290865|ref|XP_563637.2|	2.00E-07	AGAP002526-PA [Anopheles gambiae str. PEST] >gi|157018103|gb|EAL40900.2| AGAP002526-PA [Anopheles gambiae str. PEST]
BT_Q_SG_ZJU_Unigene201	gi|221504855|gb|EEE30520.1|	1.00E-05	GTP-binding protein erg, putative [Toxoplasma gondii VEG]
BT_Q_SG_ZJU_Unigene204	gi|158289559|ref|XP_311260.4|	4.00E-90	AGAP000721-PA [Anopheles gambiae str. PEST] >gi|157018575|gb|EAA06911.5| AGAP000721-PA [Anopheles gambiae str. PEST]
BT_Q_SG_ZJU_Unigene205	gi|198432751|ref|XP_002120247.1|	1.00E-22	PREDICTED: similar to Cystathionine-beta-synthase [Ciona intestinalis]
BT_Q_SG_ZJU_Unigene212	gi|91091460|ref|XP_973020.1|	1.00E-17	PREDICTED: similar to Transcription initiation factor IIF alpha subunit [Tribolium castaneum]
BT_Q_SG_ZJU_Unigene213	gi|193664638|ref|XP_001947746.1|	2.00E-29	PREDICTED: similar to coatomer protein complex, subunit beta 2 (beta prime) [Acyrthosiphon pisum]
BT_Q_SG_ZJU_Unigene214	gi|158287949|ref|XP_309825.4|	5.00E-10	AGAP010876-PA [Anopheles gambiae str. PEST] >gi|157019434|gb|EAA45310.4| AGAP010876-PA [Anopheles gambiae str. PEST]
BT_Q_SG_ZJU_Unigene219	gi|193684847|ref|XP_001950349.1|	2.00E-13	PREDICTED: similar to serine-threonine kinase receptor-associated protein (strap) [Acyrthosiphon pisum]
BT_Q_SG_ZJU_Unigene236	gi|296932843|gb|ADH93567.1|	5.00E-26	interleukin enhancer binding factor 2 [Epinephelus coioides] >gi|296932845|gb|ADH93568.1| interleukin enhancer binding factor 2 [Epinephelus coioides]
BT_Q_SG_ZJU_Unigene239	gi|189234428|ref|XP_001816488.1|	7.00E-31	PREDICTED: similar to coatomer subunit beta [Tribolium castaneum]
BT_Q_SG_ZJU_Unigene244	gi|15010430|gb|AAK77263.1|	4.00E-92	GH03753p [Drosophila melanogaster]
BT_Q_SG_ZJU_Unigene251	gi|91091338|ref|XP_966697.1|	1.00E-41	PREDICTED: similar to hnRNP protein [Tribolium castaneum]
BT_Q_SG_ZJU_Unigene253	gi|256092379|ref|XP_002581921.1|	6.00E-18	tRNA(5-methylaminomethyl-2-thiouridylate)-methy lt ransferase [Schistosoma mansoni]
BT_Q_SG_ZJU_Unigene258	gi|291221102|ref|XP_002730562.1|	4.00E-20	PREDICTED: serine palmitoyltransferase subunit 1-like [Saccoglossus kowalevskii]
BT_Q_SG_ZJU_Unigene259	gi|157108826|ref|XP_001650404.1|	1.00E-09	glycoside hydrolases [Aedes aegypti] >gi|108868503|gb|EAT32728.1| glycoside hydrolases [Aedes aegypti]
BT_Q_SG_ZJU_Unigene264	gi|193596695|ref|XP_001948726.1|	4.00E-22	PREDICTED: similar to F57G4.9 [Acyrthosiphon pisum]
BT_Q_SG_ZJU_Unigene269	gi|66515958|ref|XP_393103.2|	8.00E-61	PREDICTED: similar to CG7785-PA isoform 1 [Apis mellifera]
BT_Q_SG_ZJU_Unigene273	gi|91079600|ref|XP_968514.1|	8.00E-14	PREDICTED: similar to transcription initiation factor TFIID subunit 7 [Tribolium castaneum]
BT_Q_SG_ZJU_Unigene278	gi|156554920|ref|XP_001606473.1|	4.00E-88	PREDICTED: similar to chaperonin subunit 6a zeta isoform 1 [Nasonia vitripennis]
BT_Q_SG_ZJU_Unigene282	gi|193666898|ref|XP_001952811.1|	1.00E-10	PREDICTED: similar to O-sialoglycoprotein endopeptidase [Acyrthosiphon pisum]
BT_Q_SG_ZJU_Unigene283	gi|66507431|ref|XP_393288.2|	1.00E-21	PREDICTED: similar to ubiquitin-conjugating enzyme E2, J1 [Apis mellifera]
BT_Q_SG_ZJU_Unigene292	gi|66515491|ref|XP_392522.2|	3.00E-24	PREDICTED: similar to CG3894-PA, isoform A [Apis mellifera]
BT_Q_SG_ZJU_Unigene295	gi|118788823|ref|XP_317011.3|	5.00E-06	AGAP008432-PA [Anopheles gambiae str. PEST] >gi|116122930|gb|EAA12719.3| AGAP008432-PA [Anopheles gambiae str. PEST]
BT_Q_SG_ZJU_Unigene299	gi|66521366|ref|XP_624552.1|	5.00E-10	PREDICTED: similar to ubiquitin-like 7 [Apis mellifera]
BT_Q_SG_ZJU_Unigene300	gi|193685941|ref|XP_001952631.1|	4.00E-42	PREDICTED: similar to acid alpha-glucosidase [Acyrthosiphon pisum]
BT_Q_SG_ZJU_Unigene301	gi|189240103|ref|XP_972765.2|	5.00E-26	PREDICTED: similar to CG8841 CG8841-PA [Tribolium castaneum]
BT_Q_SG_ZJU_Unigene306	gi|148298863|ref|NP_001091773.1|	3.00E-20	SCP-related protein [Bombyx mori] >gi|110559661|gb|ABG76067.1| SCP-related protein [Bombyx mori]
BT_Q_SG_ZJU_Unigene310	gi|156329290|ref|XP_001618992.1|	2.00E-16	hypothetical protein NEMVEDRAFT_v1g224623 [Nematostella vectensis] >gi|156201205|gb|EDO26892.1| predicted protein [Nematostella vectensis]
BT_Q_SG_ZJU_Unigene315	gi|91091782|ref|XP_969684.1|	2.00E-25	PREDICTED: similar to cell division control protein [Tribolium castaneum]
BT_Q_SG_ZJU_Unigene324	gi|156084031|ref|XP_001609499.1|	7.00E-07	cysteine desulfurase [Babesia bovis T2Bo] >gi|154796750|gb|EDO05931.1| cysteine desulfurase [Babesia bovis]
BT_Q_SG_ZJU_Unigene325	gi|158302305|ref|XP_321881.4|	9.00E-12	AGAP001271-PA [Anopheles gambiae str. PEST] >gi|157012886|gb|EAA01743.4| AGAP001271-PA [Anopheles gambiae str. PEST]
BT_Q_SG_ZJU_Unigene330	gi|195385046|ref|XP_002051219.1|	1.00E-23	GJ14786 [Drosophila virilis] >gi|194147676|gb|EDW63374.1| GJ14786 [Drosophila virilis]
BT_Q_SG_ZJU_Unigene332	gi|291234381|ref|XP_002737127.1|	1.00E-44	PREDICTED: SIL1 protein-like [Saccoglossus kowalevskii]
BT_Q_SG_ZJU_Unigene337	gi|110766606|ref|XP_001120341.1|	6.00E-19	PREDICTED: similar to asparagine synthetase [Apis mellifera]
BT_Q_SG_ZJU_Unigene342	gi|193669256|ref|XP_001951304.1|	2.00E-07	PREDICTED: similar to Brix domain-containing protein 1 [Acyrthosiphon pisum]
BT_Q_SG_ZJU_Unigene345	gi|170059169|ref|XP_001865245.1|	6.00E-15	neprilysin [Culex quinquefasciatus] >gi|167878073|gb|EDS41456.1| neprilysin [Culex quinquefasciatus]
BT_Q_SG_ZJU_Unigene346	gi|297679012|ref|XP_002817343.1|	4.00E-17	PREDICTED: 60S acidic ribosomal protein P1-like isoform 1 [Pongo abelii]
BT_Q_SG_ZJU_Unigene349	gi|198412606|ref|XP_002126403.1|	8.00E-06	PREDICTED: zinc finger (C2H2)-60 [Ciona intestinalis]
BT_Q_SG_ZJU_Unigene351	gi|157126954|ref|XP_001654743.1|	5.00E-12	importin beta-4 [Aedes aegypti] >gi|108873064|gb|EAT37289.1| importin beta-4 [Aedes aegypti]
BT_Q_SG_ZJU_Unigene355	gi|66826767|ref|XP_646738.1|	5.00E-06	hypothetical protein DDB_G0270360 [Dictyostelium discoideum AX4] >gi|60474593|gb|EAL72530.1| hypothetical protein DDB_G0270360 [Dictyostelium discoideum AX4]
BT_Q_SG_ZJU_Unigene358	gi|194903617|ref|XP_001980904.1|	1.00E-19	GG13138 [Drosophila erecta] >gi|190652607|gb|EDV49862.1| GG13138 [Drosophila erecta]
BT_Q_SG_ZJU_Unigene359	gi|195167180|ref|XP_002024412.1|	2.00E-24	GL15019 [Drosophila persimilis] >gi|198469081|ref|XP_001354903.2| GA11683 [Drosophila pseudoobscura pseudoobscura] >gi|194107785|gb|EDW29828.1| GL15019 [Drosophila persimilis] >gi|198146707|gb|EAL31959.2| GA11683 [Drosophila pseudoobscura pseudoobscura]
BT_Q_SG_ZJU_Unigene362	gi|193617698|ref|XP_001948523.1|	7.00E-83	PREDICTED: similar to GA18789-PA [Acyrthosiphon pisum]
BT_Q_SG_ZJU_Unigene364	gi|193617698|ref|XP_001948523.1|	8.00E-35	PREDICTED: similar to GA18789-PA [Acyrthosiphon pisum]
BT_Q_SG_ZJU_Unigene377	gi|66519672|ref|XP_393828.2|	2.00E-10	PREDICTED: similar to katanin p80 (WD40-containing) subunit B 1 [Apis mellifera]
BT_Q_SG_ZJU_Unigene385	gi|158296287|ref|XP_316706.4|	1.00E-22	AGAP006670-PA [Anopheles gambiae str. PEST] >gi|157016439|gb|EAA11416.4| AGAP006670-PA [Anopheles gambiae str. PEST]
BT_Q_SG_ZJU_Unigene390	gi|29169172|gb|AAO66461.1|	3.00E-13	pG1 protein [Homo sapiens]
BT_Q_SG_ZJU_Unigene398	gi|112984100|ref|NP_001037430.1|	4.00E-11	yellow-b [Bombyx mori] >gi|86450725|gb|ABC96698.1| yellow-b [Bombyx mori]
BT_Q_SG_ZJU_Unigene400	gi|292630134|ref|XP_002667743.1|	9.00E-08	PREDICTED: predicted protein-like [Danio rerio]
BT_Q_SG_ZJU_Unigene401	gi|195157178|ref|XP_002019473.1|	2.00E-87	GL12416 [Drosophila persimilis] >gi|194116064|gb|EDW38107.1| GL12416 [Drosophila persimilis]
BT_Q_SG_ZJU_Unigene402	gi|301629333|ref|XP_002943797.1|	2.00E-09	PREDICTED: UPF0065 protein in clcB-clcD intergenic region-like [Xenopus (Silurana) tropicalis]
BT_Q_SG_ZJU_Unigene403	gi|193615549|ref|XP_001951897.1|	2.00E-71	PREDICTED: similar to AGAP006139-PA [Acyrthosiphon pisum]
BT_Q_SG_ZJU_Unigene409	gi|239788387|dbj|BAH70879.1|	2.00E-22	ACYPI003867 [Acyrthosiphon pisum]
BT_Q_SG_ZJU_Unigene412	gi|281204768|gb|EFA78963.1|	6.00E-06	hypothetical protein PPL_08431 [Polysphondylium pallidum PN500]
BT_Q_SG_ZJU_Unigene413	gi|195472229|ref|XP_002088404.1|	4.00E-12	GE18547 [Drosophila yakuba] >gi|194174505|gb|EDW88116.1| GE18547 [Drosophila yakuba]
BT_Q_SG_ZJU_Unigene421	gi|156541996|ref|XP_001600168.1|	2.00E-49	PREDICTED: similar to p23-like protein [Nasonia vitripennis]
BT_Q_SG_ZJU_Unigene422	gi|193603376|ref|XP_001948080.1|	6.00E-63	PREDICTED: similar to CG5525 CG5525-PA [Acyrthosiphon pisum]
BT_Q_SG_ZJU_Unigene426	gi|260810620|ref|XP_002600056.1|	8.00E-06	hypothetical protein BRAFLDRAFT_79689 [Branchiostoma floridae] >gi|229285341|gb|EEN56068.1| hypothetical protein BRAFLDRAFT_79689 [Branchiostoma floridae]
BT_Q_SG_ZJU_Unigene428	gi|157131371|ref|XP_001662217.1|	1.00E-27	na+/k+ atpase alpha subunit [Aedes aegypti] >gi|108871576|gb|EAT35801.1| na+/k+ atpase alpha subunit [Aedes aegypti]
BT_Q_SG_ZJU_Unigene430	gi|301631647|ref|XP_002944909.1|	1.00E-21	PREDICTED: protein rtcB-like [Xenopus (Silurana) tropicalis]
BT_Q_SG_ZJU_Unigene431	gi|158291368|ref|XP_312882.4|	1.00E-140	AGAP003184-PA [Anopheles gambiae str. PEST] >gi|157017742|gb|EAA08478.4| AGAP003184-PA [Anopheles gambiae str. PEST]
BT_Q_SG_ZJU_Unigene436	gi|156542064|ref|XP_001601359.1|	9.00E-13	PREDICTED: similar to wd-repeat protein [Nasonia vitripennis]
BT_Q_SG_ZJU_Unigene443	gi|184186121|ref|NP_001116983.1|	8.00E-29	rab7 GTPase homolog SUrab7 [Strongylocentrotus purpuratus] >gi|115974362|ref|XP_001176741.1| PREDICTED: similar to Rab7 [Strongylocentrotus purpuratus]
BT_Q_SG_ZJU_Unigene445	gi|193629693|ref|XP_001946259.1|	4.00E-17	PREDICTED: similar to nadph cytochrome P450, partial [Acyrthosiphon pisum]
BT_Q_SG_ZJU_Unigene446	gi|156544680|ref|XP_001605249.1|	2.00E-26	PREDICTED: similar to G protein pathway suppressor 1 [Nasonia vitripennis]
BT_Q_SG_ZJU_Unigene456	gi|292619600|ref|XP_002664034.1|	4.00E-06	PREDICTED: Si:busm1-64d20.2 protein-like [Danio rerio]
BT_Q_SG_ZJU_Unigene461	gi|296198405|ref|XP_002746694.1|	1.00E-19	PREDICTED: 40S ribosomal protein SA-like [Callithrix jacchus]
BT_Q_SG_ZJU_Unigene463	gi|195108581|ref|XP_001998871.1|	8.00E-14	GI23391 [Drosophila mojavensis] >gi|193915465|gb|EDW14332.1| GI23391 [Drosophila mojavensis]
BT_Q_SG_ZJU_Unigene474	gi|66524943|ref|XP_394073.2|	1.00E-43	PREDICTED: similar to CG3295-PA [Apis mellifera]
BT_Q_SG_ZJU_Unigene476	gi|292630134|ref|XP_002667743.1|	4.00E-08	PREDICTED: predicted protein-like [Danio rerio]
BT_Q_SG_ZJU_Unigene479	gi|195129487|ref|XP_002009187.1|	6.00E-29	GI13908 [Drosophila mojavensis] >gi|193920796|gb|EDW19663.1| GI13908 [Drosophila mojavensis]
BT_Q_SG_ZJU_Unigene488	gi|196019279|ref|XP_002118954.1|	8.00E-19	hypothetical protein TRIADDRAFT_62932 [Trichoplax adhaerens] >gi|190577561|gb|EDV18560.1| hypothetical protein TRIADDRAFT_62932 [Trichoplax adhaerens]
BT_Q_SG_ZJU_Unigene493	gi|91090618|ref|XP_973346.1|	2.00E-37	PREDICTED: similar to phosphoacetylglucosamine mutase [Tribolium castaneum]
BT_Q_SG_ZJU_Unigene496	gi|189236914|ref|XP_969111.2|	1.00E-39	PREDICTED: similar to alpha-(1,6)-fucosyltransferase [Tribolium castaneum]
BT_Q_SG_ZJU_Unigene499	gi|254946115|gb|ACT91090.1|	2.00E-10	adenine nucleotide translocase [Antheraea pernyi]
BT_Q_SG_ZJU_Unigene504	gi|225711690|gb|ACO11691.1|	6.00E-14	ORF91 [Caligus rogercresseyi]
BT_Q_SG_ZJU_Unigene507	gi|66910377|gb|AAH96994.1|	1.00E-17	Zgc:92643 protein [Danio rerio]
BT_Q_SG_ZJU_Unigene509	gi|193596613|ref|XP_001952115.1|	8.00E-57	PREDICTED: similar to AGAP000652-PA [Acyrthosiphon pisum]
BT_Q_SG_ZJU_Unigene514	gi|148692628|gb|EDL24575.1|	3.00E-26	mCG140959, isoform CRA_e [Mus musculus]
BT_Q_SG_ZJU_Unigene526	gi|91094747|ref|XP_971437.1|	2.00E-60	PREDICTED: similar to s-adenosyl-methyl transferase mraw [Tribolium castaneum]
BT_Q_SG_ZJU_Unigene529	gi|301631679|ref|XP_002944925.1|	2.00E-10	PREDICTED: hypothetical protein LOC100492482 [Xenopus (Silurana) tropicalis]
BT_Q_SG_ZJU_Unigene530	gi|239790868|dbj|BAH71968.1|	1.00E-21	ACYPI000351 [Acyrthosiphon pisum]
BT_Q_SG_ZJU_Unigene532	gi|291237266|ref|XP_002738556.1|	5.00E-19	PREDICTED: RNA binding protein (autoantigenic, hnRNP-associated with lethal yellow) long-like [Saccoglossus kowalevskii]
BT_Q_SG_ZJU_Unigene534	gi|239793032|dbj|BAH72781.1|	1.00E-15	ACYPI003062 [Acyrthosiphon pisum]
BT_Q_SG_ZJU_Unigene537	gi|115497256|ref|NP_001069106.1|	3.00E-22	dynactin subunit 6 [Bos taurus] >gi|122143586|sp|Q148G7.1|DCTN6_BOVIN RecName: Full=Dynactin subunit 6 >gi|109940012|gb|AAI18352.1| Dynactin 6 [Bos taurus] >gi|296472385|gb|DAA14500.1| dynactin subunit 6 [Bos taurus]
BT_Q_SG_ZJU_Unigene538	gi|66526707|ref|XP_624402.1|	2.00E-11	PREDICTED: similar to CG6129-PB, isoform B [Apis mellifera]
BT_Q_SG_ZJU_Unigene540	gi|91092202|ref|XP_969503.1|	2.00E-23	PREDICTED: similar to CG32590 CG32590-PA [Tribolium castaneum]
BT_Q_SG_ZJU_Unigene541	gi|195144378|ref|XP_002013173.1|	4.00E-27	GL23535 [Drosophila persimilis] >gi|194102116|gb|EDW24159.1| GL23535 [Drosophila persimilis]
BT_Q_SG_ZJU_Unigene546	gi|16930529|gb|AAL31950.1|	3.00E-07	CDH1-D [Gallus gallus]
BT_Q_SG_ZJU_Unigene548	gi|291240393|ref|XP_002740105.1|	6.00E-10	PREDICTED: angiotensin I converting enzyme 1-like [Saccoglossus kowalevskii]
BT_Q_SG_ZJU_Unigene550	gi|221126335|ref|XP_002166152.1|	1.00E-18	PREDICTED: similar to aldehyde dehydrogenase 2b [Hydra magnipapillata]
BT_Q_SG_ZJU_Unigene551	gi|156547061|ref|XP_001601694.1|	1.00E-132	PREDICTED: similar to ribosome biogenesis protein tsr1 (20S rrna accumulation protein 1) [Nasonia vitripennis]
BT_Q_SG_ZJU_Unigene554	gi|229577323|ref|NP_001153353.1|	3.00E-35	signal sequence receptor, alpha [Nasonia vitripennis]
BT_Q_SG_ZJU_Unigene555	gi|289740341|gb|ADD18918.1|	5.00E-07	mitochondrial 28S ribosomal protein S30 [Glossina morsitans morsitans]
BT_Q_SG_ZJU_Unigene561	gi|193591799|ref|XP_001948516.1|	1.00E-101	PREDICTED: similar to AGAP009961-PA [Acyrthosiphon pisum]
BT_Q_SG_ZJU_Unigene563	gi|67043769|gb|AAY63983.1|	5.00E-49	succinate dehydrogenase iron sulfur subunit B [Lysiphlebus testaceipes]
BT_Q_SG_ZJU_Unigene565	gi|189237843|ref|XP_974681.2|	4.00E-34	PREDICTED: similar to villin [Tribolium castaneum]
BT_Q_SG_ZJU_Unigene566	gi|263505243|sp|A7RFA1.1|PTER_NEMVE	4.00E-08	RecName: Full=Phosphotriesterase-related protein; AltName: Full=Parathion hydrolase-related protein
BT_Q_SG_ZJU_Unigene568	gi|63660228|ref|XP_484341.2|	1.00E-23	PREDICTED: similar to sid478p [Mus musculus]
BT_Q_SG_ZJU_Unigene570	gi|91077074|ref|XP_969460.1|	9.00E-18	PREDICTED: similar to CG3823 CG3823-PA [Tribolium castaneum]
BT_Q_SG_ZJU_Unigene574	gi|291415748|ref|XP_002724111.1|	3.00E-09	PREDICTED: rRNA promoter binding protein-like [Oryctolagus cuniculus]
BT_Q_SG_ZJU_Unigene578	gi|221124478|ref|XP_002165995.1|	2.00E-14	PREDICTED: similar to acyl-Coenzyme A dehydrogenase, long chain [Hydra magnipapillata]
BT_Q_SG_ZJU_Unigene580	gi|195455751|ref|XP_002074851.1|	6.00E-21	GK23278 [Drosophila willistoni] >gi|194170936|gb|EDW85837.1| GK23278 [Drosophila willistoni]
BT_Q_SG_ZJU_Unigene581	gi|225714944|gb|ACO13318.1|	1.00E-27	40S ribosomal protein S15a [Esox lucius]
BT_Q_SG_ZJU_Unigene583	gi|193625113|ref|XP_001949592.1|	9.00E-10	PREDICTED: similar to tumor suppressing subtransferable candidate 1 [Acyrthosiphon pisum]
BT_Q_SG_ZJU_Unigene586	gi|110776308|ref|XP_394910.3|	4.00E-07	PREDICTED: similar to UTP14, U3 small nucleolar ribonucleoprotein, homolog A, partial [Apis mellifera]
BT_Q_SG_ZJU_Unigene589	gi|91089827|ref|XP_969424.1|	1.00E-70	PREDICTED: similar to AGAP002956-PA [Tribolium castaneum]
BT_Q_SG_ZJU_Unigene590	gi|156554455|ref|XP_001604233.1|	3.00E-28	PREDICTED: similar to Srp54 protein [Nasonia vitripennis]
BT_Q_SG_ZJU_Unigene591	gi|58378948|ref|XP_309141.2|	5.00E-35	AGAP000951-PB [Anopheles gambiae str. PEST] >gi|158287089|ref|XP_001688166.1| AGAP000951-PA [Anopheles gambiae str. PEST] >gi|55245016|gb|EAA04925.2| AGAP000951-PB [Anopheles gambiae str. PEST] >gi|157019740|gb|EDO64476.1| AGAP000951-PA [Anopheles gambiae str. PEST]
BT_Q_SG_ZJU_Unigene593	gi|291237670|ref|XP_002738749.1|	2.00E-40	PREDICTED: ADP-ribosylation factor-like 2-like [Saccoglossus kowalevskii]
BT_Q_SG_ZJU_Unigene609	gi|14670256|gb|AAK72092.1|U64844_4	2.00E-11	Hypothetical protein T22F3.3a [Caenorhabditis elegans]
BT_Q_SG_ZJU_Unigene610	gi|301631729|ref|XP_002944948.1|	5.00E-19	PREDICTED: protein pmbA-like [Xenopus (Silurana) tropicalis]
BT_Q_SG_ZJU_Unigene611	gi|222052452|dbj|BAH15940.1|	1.00E-65	NADH dehydrogenase subunit 4 [Homo sapiens] >gi|222052578|dbj|BAH16057.1| NADH dehydrogenase subunit 4 [Homo sapiens]
BT_Q_SG_ZJU_Unigene616	gi|9972772|sp|P90682.2|CATA_ASCSU	3.00E-21	RecName: Full=Catalase >gi|2244746|emb|CAA71618.1| catalase [Ascaris suum]
BT_Q_SG_ZJU_Unigene617	gi|195108949|ref|XP_001999055.1|	2.00E-23	GI23283 [Drosophila mojavensis] >gi|193915649|gb|EDW14516.1| GI23283 [Drosophila mojavensis]
BT_Q_SG_ZJU_Unigene619	gi|194035236|ref|XP_001924454.1|	3.00E-09	PREDICTED: similar to Phosphoglucomutase 3 [Sus scrofa]
BT_Q_SG_ZJU_Unigene623	gi|193620179|ref|XP_001943709.1|	4.00E-21	PREDICTED: similar to phosphatidylserine decarboxylase [Acyrthosiphon pisum]
BT_Q_SG_ZJU_Unigene624	gi|156542947|ref|XP_001601923.1|	2.00E-29	PREDICTED: similar to GA19676-PA [Nasonia vitripennis]
BT_Q_SG_ZJU_Unigene626	gi|157123560|ref|XP_001660203.1|	2.00E-11	dimethyladenosine transferase [Aedes aegypti] >gi|108874371|gb|EAT38596.1| dimethyladenosine transferase [Aedes aegypti]
BT_Q_SG_ZJU_Unigene629	gi|189234953|ref|XP_973099.2|	3.00E-40	PREDICTED: similar to AGAP011327-PA [Tribolium castaneum]
BT_Q_SG_ZJU_Unigene632	gi|189238660|ref|XP_972432.2|	7.00E-66	PREDICTED: similar to CG10903 CG10903-PA [Tribolium castaneum]
BT_Q_SG_ZJU_Unigene639	gi|110456474|gb|ABG74714.1|	3.00E-17	Ac1147-like protein [Diaphorina citri]
BT_Q_SG_ZJU_Unigene641	gi|157123090|ref|XP_001660002.1|	1.00E-17	ccr4-associated factor [Aedes aegypti] >gi|108874495|gb|EAT38720.1| ccr4-associated factor [Aedes aegypti]
BT_Q_SG_ZJU_Unigene645	gi|110756927|ref|XP_394588.3|	1.00E-39	PREDICTED: similar to Synaptosomal-associated protein 25 (SNAP-25) (Synaptosomal-associated 25 kDa protein) isoform 1 [Apis mellifera]
BT_Q_SG_ZJU_Unigene653	gi|156553058|ref|XP_001599072.1|	6.00E-06	PREDICTED: similar to phosphodiesterase 6D, cGMP-specific, rod, delta (predicted) [Nasonia vitripennis]
BT_Q_SG_ZJU_Unigene660	gi|110761817|ref|XP_001122523.1|	6.00E-22	PREDICTED: similar to CG30476-PA [Apis mellifera]
BT_Q_SG_ZJU_Unigene663	gi|115951012|ref|XP_001192784.1|	2.00E-08	PREDICTED: similar to delta-adaptin [Strongylocentrotus purpuratus]
BT_Q_SG_ZJU_Unigene669	gi|239789427|dbj|BAH71339.1|	3.00E-57	ACYPI006329 [Acyrthosiphon pisum]
BT_Q_SG_ZJU_Unigene681	gi|239788992|dbj|BAH71146.1|	1.00E-12	ACYPI006840 [Acyrthosiphon pisum]
BT_Q_SG_ZJU_Unigene682	gi|193699891|ref|XP_001951272.1|	9.00E-52	PREDICTED: similar to Mitochondrial phosphate carrier protein CG4994-PA [Acyrthosiphon pisum]
BT_Q_SG_ZJU_Unigene683	gi|189241276|ref|XP_974567.2|	8.00E-17	PREDICTED: similar to CG3983 CG3983-PB [Tribolium castaneum]
BT_Q_SG_ZJU_Unigene684	gi|11466552|ref|NP_044801.1|	3.00E-17	NADH dehydrogenase subunit 4 [Reclinomonas americana] >gi|2258382|gb|AAD11916.1| NADH dehydrogenase subunit 4 [Reclinomonas americana]
BT_Q_SG_ZJU_Unigene687	gi|195393554|ref|XP_002055419.1|	3.00E-62	GJ18800 [Drosophila virilis] >gi|194149929|gb|EDW65620.1| GJ18800 [Drosophila virilis]
BT_Q_SG_ZJU_Unigene688	gi|18860073|ref|NP_572881.1|	7.00E-29	Tim9a [Drosophila melanogaster] >gi|12230175|sp|Q9VYD7.1|TIM9_DROME RecName: Full=Mitochondrial import inner membrane translocase subunit Tim9 >gi|7292873|gb|AAF48265.1| Tim9a [Drosophila melanogaster] >gi|108383231|gb|ABF85712.1| IP02031p [Drosophila melanogaster]
BT_Q_SG_ZJU_Unigene690	gi|91081125|ref|XP_975535.1|	1.00E-27	PREDICTED: similar to CG3652 CG3652-PA [Tribolium castaneum]
BT_Q_SG_ZJU_Unigene692	gi|193676660|ref|XP_001949828.1|	1.00E-09	PREDICTED: similar to zinc finger, AN1-type domain 1 [Acyrthosiphon pisum]
BT_Q_SG_ZJU_Unigene699	gi|195109763|ref|XP_001999451.1|	8.00E-08	GI23060 [Drosophila mojavensis] >gi|193916045|gb|EDW14912.1| GI23060 [Drosophila mojavensis]
BT_Q_SG_ZJU_Unigene700	gi|301130069|gb|ADK61887.1|	6.00E-54	cytochrome c oxidase subunit I [Homo sapiens] >gi|301130167|gb|ADK61978.1| cytochrome c oxidase subunit I [Homo sapiens]
BT_Q_SG_ZJU_Unigene701	gi|156538637|ref|XP_001607663.1|	4.00E-06	PREDICTED: similar to ENSANGP00000031544 [Nasonia vitripennis]
BT_Q_SG_ZJU_Unigene709	gi|189241712|ref|XP_968082.2|	1.00E-29	PREDICTED: similar to xaa-pro dipeptidase app(e.coli) [Tribolium castaneum]
BT_Q_SG_ZJU_Unigene713	gi|157134067|ref|XP_001663131.1|	1.00E-32	26S protease regulatory subunit [Aedes aegypti] >gi|108870627|gb|EAT34852.1| 26S protease regulatory subunit [Aedes aegypti]
BT_Q_SG_ZJU_Unigene715	gi|153791332|ref|NP_001093285.1|	4.00E-21	coiled-coil-helix-coiled-coil-helix domain-containing protein 2, mitochondrial-like [Bombyx mori] >gi|95103146|gb|ABF51514.1| GA18592-PA [Bombyx mori]
BT_Q_SG_ZJU_Unigene717	gi|242002550|ref|XP_002435918.1|	1.00E-10	hypothetical protein IscW_ISCW024385 [Ixodes scapularis] >gi|215499254|gb|EEC08748.1| hypothetical protein IscW_ISCW024385 [Ixodes scapularis]
BT_Q_SG_ZJU_Unigene720	gi|156549512|ref|XP_001604878.1|	6.00E-77	PREDICTED: similar to elongation factor tu (ef-tu) [Nasonia vitripennis]
BT_Q_SG_ZJU_Unigene724	gi|193678983|ref|XP_001943241.1|	4.00E-06	PREDICTED: similar to Gustatory receptor 43a CG1712-PA [Acyrthosiphon pisum]
BT_Q_SG_ZJU_Unigene726	gi|114052408|ref|NP_001040475.1|	2.00E-39	mitochondrial aldehyde dehydrogenase [Bombyx mori] >gi|95103046|gb|ABF51464.1| mitochondrial aldehyde dehydrogenase [Bombyx mori]
BT_Q_SG_ZJU_Unigene727	gi|301758420|ref|XP_002915056.1|	7.00E-09	PREDICTED: solute carrier family 28 member 3-like [Ailuropoda melanoleuca]
BT_Q_SG_ZJU_Unigene728	gi|91085997|ref|XP_972384.1|	3.00E-56	PREDICTED: similar to cyclin [Tribolium castaneum]
BT_Q_SG_ZJU_Unigene730	gi|158301533|ref|XP_321202.3|	1.00E-10	AGAP001865-PA [Anopheles gambiae str. PEST] >gi|157012518|gb|EAA01755.3| AGAP001865-PA [Anopheles gambiae str. PEST]
BT_Q_SG_ZJU_Unigene733	gi|156102256|ref|XP_001616821.1|	5.00E-09	Sperm-specific protein Don juan [Plasmodium vivax SaI-1]
BT_Q_SG_ZJU_Unigene738	gi|259122227|gb|ACV92248.1|	2.00E-27	cytochrome b [Homo sapiens]
BT_Q_SG_ZJU_Unigene739	gi|118777118|ref|XP_307499.3|	4.00E-41	Anopheles gambiae str. PEST CLIP-domain serine protease subfamily A (AGAP012591-PA) [Anopheles gambiae str. PEST] >gi|116133048|gb|EAA03300.3| CLIP-domain serine protease subfamily A (AGAP012591-PA) [Anopheles gambiae str. PEST]
BT_Q_SG_ZJU_Unigene740	gi|156375302|ref|XP_001630020.1|	8.00E-06	predicted protein [Nematostella vectensis] >gi|156217033|gb|EDO37957.1| predicted protein [Nematostella vectensis]
BT_Q_SG_ZJU_Unigene748	gi|221128031|ref|XP_002155059.1|	5.00E-46	PREDICTED: similar to Translation elongation factor, mitochondrial [Hydra magnipapillata]
BT_Q_SG_ZJU_Unigene766	gi|91091852|ref|XP_968503.1|	3.00E-21	PREDICTED: similar to innexin-1 [Tribolium castaneum]
BT_Q_SG_ZJU_Unigene767	gi|110768797|ref|XP_001122801.1|	1.00E-49	PREDICTED: similar to Transcription initiation factor IIF alpha subunit (TFIIF-alpha) (Transcription factor 5 large chain) (TF5A) [Apis mellifera]
BT_Q_SG_ZJU_Unigene773	gi|301629878|ref|XP_002944059.1|	7.00E-14	PREDICTED: sn-glycerol-3-phosphate transport system permease protein ugpA-like [Xenopus (Silurana) tropicalis]
BT_Q_SG_ZJU_Unigene774	gi|156543124|ref|XP_001605583.1|	4.00E-43	PREDICTED: similar to tpr repeat nuclear phosphoprotein [Nasonia vitripennis]
BT_Q_SG_ZJU_Unigene784	gi|114050941|ref|NP_001040329.1|	4.00E-54	receptor expression enhancing protein isoform 2 [Bombyx mori] >gi|87248617|gb|ABD36361.1| receptor expression enhancing protein isoform 2 [Bombyx mori]
BT_Q_SG_ZJU_Unigene786	gi|193587168|ref|XP_001946240.1|	1.00E-107	PREDICTED: similar to NADH-ubiquinone oxidoreductase flavoprotein 1 (ndufv1) [Acyrthosiphon pisum]
BT_Q_SG_ZJU_Unigene798	gi|193631875|ref|XP_001948035.1|	1.00E-16	PREDICTED: similar to AGAP001872-PA [Acyrthosiphon pisum]
BT_Q_SG_ZJU_Unigene800	gi|58383485|ref|XP_312570.2|	2.00E-54	AGAP002385-PA [Anopheles gambiae str. PEST] >gi|55242397|gb|EAA08080.2| AGAP002385-PA [Anopheles gambiae str. PEST]
BT_Q_SG_ZJU_Unigene803	gi|193690540|ref|XP_001942998.1|	1.00E-42	PREDICTED: similar to AGAP007698-PC [Acyrthosiphon pisum]
BT_Q_SG_ZJU_Unigene805	gi|110764940|ref|XP_001122019.1|	3.00E-47	PREDICTED: similar to Mitochondrial carrier homolog 1 CG6851-PA, isoform A [Apis mellifera]
BT_Q_SG_ZJU_Unigene808	gi|193669256|ref|XP_001951304.1|	6.00E-15	PREDICTED: similar to Brix domain-containing protein 1 [Acyrthosiphon pisum]
BT_Q_SG_ZJU_Unigene810	gi|110771256|ref|XP_001123184.1|	2.00E-50	PREDICTED: similar to CG33713-PB, isoform B [Apis mellifera]
BT_Q_SG_ZJU_Unigene811	gi|195114784|ref|XP_002001947.1|	5.00E-07	GI17113 [Drosophila mojavensis] >gi|193912522|gb|EDW11389.1| GI17113 [Drosophila mojavensis]
BT_Q_SG_ZJU_Unigene815	gi|110761088|ref|XP_393743.3|	3.00E-34	PREDICTED: similar to CG5558-PB, isoform B [Apis mellifera]
BT_Q_SG_ZJU_Unigene816	gi|48113496|ref|XP_393160.1|	2.00E-28	PREDICTED: similar to CG8057-PA, isoform A isoform 1 [Apis mellifera]
BT_Q_SG_ZJU_Unigene817	gi|195466336|ref|XP_002075984.1|	1.00E-08	GK21228 [Drosophila willistoni] >gi|194172069|gb|EDW86970.1| GK21228 [Drosophila willistoni]
BT_Q_SG_ZJU_Unigene819	gi|110766351|ref|XP_395869.3|	3.00E-48	PREDICTED: similar to CG1017-PA [Apis mellifera]
BT_Q_SG_ZJU_Unigene820	gi|91093058|ref|XP_967697.1|	4.00E-50	PREDICTED: similar to GrpE-like 1, mitochondrial [Tribolium castaneum]
BT_Q_SG_ZJU_Unigene834	gi|301630030|ref|XP_002944134.1|	7.00E-07	PREDICTED: long-chain-fatty-acid--CoA ligase-like [Xenopus (Silurana) tropicalis]
BT_Q_SG_ZJU_Unigene837	gi|224492639|emb|CAX17290.1|	1.00E-111	translation initiation factor 2, gamma subunit [Medauroidea extradentata]
BT_Q_SG_ZJU_Unigene839	gi|134085734|ref|NP_001076960.1|	8.00E-08	alpha-1,3-mannosyltransferase ALG2 [Bos taurus] >gi|133777525|gb|AAI14871.1| ALG2 protein [Bos taurus] >gi|296484643|gb|DAA26758.1| alpha-1,3-mannosyltransferase ALG2 [Bos taurus]
BT_Q_SG_ZJU_Unigene846	gi|66565839|ref|XP_395065.2|	2.00E-51	PREDICTED: similar to Clathrin light chain CG6948-PA [Apis mellifera]
BT_Q_SG_ZJU_Unigene847	gi|193676442|ref|XP_001946968.1|	1.00E-18	PREDICTED: similar to taz protein (tafazzin) [Acyrthosiphon pisum]
BT_Q_SG_ZJU_Unigene850	gi|189236619|ref|XP_001816527.1|	4.00E-80	PREDICTED: similar to n-acetyltransferase [Tribolium castaneum]
BT_Q_SG_ZJU_Unigene851	gi|301629973|ref|XP_002944106.1|	8.00E-14	PREDICTED: phenylalanyl-tRNA synthetase alpha chain-like [Xenopus (Silurana) tropicalis]
BT_Q_SG_ZJU_Unigene856	gi|193580286|ref|XP_001943259.1|	2.00E-08	PREDICTED: similar to alkaline phosphatase [Acyrthosiphon pisum]
BT_Q_SG_ZJU_Unigene858	gi|123439308|ref|XP_001310427.1|	2.00E-19	virulent strain associated lipoprotein [Trichomonas vaginalis G3]
BT_Q_SG_ZJU_Unigene860	gi|295916973|gb|ADG59800.1|	1.00E-12	cytochrome oxidase subunit I [Tetraleurodes acaciae] >gi|295916977|gb|ADG59802.1| cytochrome oxidase subunit I [Tetraleurodes acaciae] >gi|295916979|gb|ADG59803.1| cytochrome oxidase subunit I [Tetraleurodes acaciae] >gi|295916981|gb|ADG59804.1| cytochrome oxidase subunit I [Tetraleurodes acaciae]
BT_Q_SG_ZJU_Unigene861	gi|156548104|ref|XP_001606456.1|	6.00E-33	PREDICTED: similar to ENSANGP00000026211 [Nasonia vitripennis]
BT_Q_SG_ZJU_Unigene863	gi|195013840|ref|XP_001983915.1|	4.00E-25	GH16155 [Drosophila grimshawi] >gi|193897397|gb|EDV96263.1| GH16155 [Drosophila grimshawi]
BT_Q_SG_ZJU_Unigene865	gi|198422394|ref|XP_002130397.1|	5.00E-10	PREDICTED: similar to Conserved oligomeric Golgi complex subunit 4 (COG complex subunit 4) (Component of oligomeric golgi complex 4) [Ciona intestinalis]
BT_Q_SG_ZJU_Unigene866	gi|156547601|ref|XP_001603318.1|	2.00E-67	PREDICTED: similar to LD17927p [Nasonia vitripennis]
BT_Q_SG_ZJU_Unigene872	gi|110758879|ref|XP_393220.3|	3.00E-19	PREDICTED: similar to CG33950-PD, isoform D [Apis mellifera]
BT_Q_SG_ZJU_Unigene877	gi|110761395|ref|XP_624018.2|	1.00E-16	PREDICTED: similar to flavin adenine dinucleotide synthetase isoform 1 [Apis mellifera]
BT_Q_SG_ZJU_Unigene879	gi|193709429|ref|XP_001944009.1|	1.00E-08	PREDICTED: similar to CG7154 CG7154-PA, partial [Acyrthosiphon pisum]
BT_Q_SG_ZJU_Unigene886	gi|195127710|ref|XP_002008311.1|	9.00E-20	GI11883 [Drosophila mojavensis] >gi|193919920|gb|EDW18787.1| GI11883 [Drosophila mojavensis]
BT_Q_SG_ZJU_Unigene899	gi|156538841|ref|XP_001607999.1|	5.00E-64	PREDICTED: similar to glucosidase, alpha, acid [Nasonia vitripennis]
BT_Q_SG_ZJU_Unigene904	gi|66504551|ref|XP_392222.2|	2.00E-10	PREDICTED: similar to sequestosome 1 isoform 1 [Apis mellifera]
BT_Q_SG_ZJU_Unigene910	gi|195164502|ref|XP_002023086.1|	2.00E-13	GL21167 [Drosophila persimilis] >gi|194105171|gb|EDW27214.1| GL21167 [Drosophila persimilis]
BT_Q_SG_ZJU_Unigene916	gi|193713565|ref|XP_001945755.1|	9.00E-51	PREDICTED: similar to AGAP003856-PA [Acyrthosiphon pisum]
BT_Q_SG_ZJU_Unigene919	gi|221128031|ref|XP_002155059.1|	9.00E-34	PREDICTED: similar to Translation elongation factor, mitochondrial [Hydra magnipapillata]
BT_Q_SG_ZJU_Unigene920	gi|119584581|gb|EAW64177.1|	1.00E-08	hCG2042888, isoform CRA_a [Homo sapiens] >gi|119584582|gb|EAW64178.1| hCG2042888, isoform CRA_a [Homo sapiens] >gi|119584583|gb|EAW64179.1| hCG2042888, isoform CRA_a [Homo sapiens]
BT_Q_SG_ZJU_Unigene925	gi|110772336|ref|XP_395632.3|	5.00E-61	PREDICTED: similar to specifically Rac1-associated protein 1 CG4931-PA isoform 1 [Apis mellifera]
BT_Q_SG_ZJU_Unigene927	gi|125978519|ref|XP_001353292.1|	5.00E-13	GA19653 [Drosophila pseudoobscura pseudoobscura] >gi|195160299|ref|XP_002021013.1| GL25060 [Drosophila persimilis] >gi|54642046|gb|EAL30795.1| GA19653 [Drosophila pseudoobscura pseudoobscura] >gi|194118126|gb|EDW40169.1| GL25060 [Drosophila persimilis]
BT_Q_SG_ZJU_Unigene928	gi|66533242|ref|XP_624942.1|	2.00E-18	PREDICTED: similar to TBP-associated factor 7 CG2670-PA isoform 2 [Apis mellifera]
BT_Q_SG_ZJU_Unigene933	gi|195172784|ref|XP_002027176.1|	1.00E-20	GL20014 [Drosophila persimilis] >gi|198459487|ref|XP_001361397.2| GA15264 [Drosophila pseudoobscura pseudoobscura] >gi|194112989|gb|EDW35032.1| GL20014 [Drosophila persimilis] >gi|198136706|gb|EAL25975.2| GA15264 [Drosophila pseudoobscura pseudoobscura]
BT_Q_SG_ZJU_Unigene935	gi|110763686|ref|XP_001121108.1|	2.00E-24	PREDICTED: similar to yantar CG18426-PA [Apis mellifera]
BT_Q_SG_ZJU_Unigene936	gi|239742911|ref|XP_001714319.2|	4.00E-06	PREDICTED: similar to serine/threonine-protein kinase, putative [Homo sapiens] >gi|239748878|ref|XP_001727039.2| PREDICTED: similar to serine/threonine-protein kinase, putative [Homo sapiens]
BT_Q_SG_ZJU_Unigene937	gi|158285965|ref|XP_308543.4|	3.00E-29	AGAP007259-PA [Anopheles gambiae str. PEST] >gi|157020243|gb|EAA04310.4| AGAP007259-PA [Anopheles gambiae str. PEST]
BT_Q_SG_ZJU_Unigene938	gi|86560093|gb|ABD04400.1|	8.00E-30	beta-actin [Clarias fuscus]
BT_Q_SG_ZJU_Unigene939	gi|301629631|ref|XP_002943941.1|	1.00E-17	PREDICTED: malate synthase G-like [Xenopus (Silurana) tropicalis]
BT_Q_SG_ZJU_Unigene943	gi|291227356|ref|XP_002733652.1|	3.00E-13	PREDICTED: Down syndrome critical region protein 2-like [Saccoglossus kowalevskii]
BT_Q_SG_ZJU_Unigene959	gi|156546522|ref|XP_001606212.1|	1.00E-87	PREDICTED: similar to ENSANGP00000013285 [Nasonia vitripennis]
BT_Q_SG_ZJU_Unigene960	gi|156548496|ref|XP_001605639.1|	5.00E-77	PREDICTED: similar to CG5830-PA [Nasonia vitripennis]
BT_Q_SG_ZJU_Unigene965	gi|66515288|ref|XP_392511.2|	3.00E-34	PREDICTED: similar to eIF5 CG9177-PB, isoform B isoform 1 [Apis mellifera]
BT_Q_SG_ZJU_Unigene968	gi|48102797|ref|XP_395432.1|	1.00E-149	PREDICTED: similar to Transcription initiation factor IIB (General transcription factor TFIIB) isoform 1 [Apis mellifera]
BT_Q_SG_ZJU_Unigene995	gi|110763838|ref|XP_395927.3|	1.00E-137	PREDICTED: similar to Lk6 CG17342-PA, isoform A [Apis mellifera]
BT_Q_SG_ZJU_Unigene997	gi|66506849|ref|XP_394678.2|	1.00E-37	PREDICTED: similar to CG12333-PA [Apis mellifera]
BT_Q_SG_ZJU_Unigene998	gi|193594137|ref|XP_001952759.1|	5.00E-42	PREDICTED: similar to CG12341 CG12341-PA [Acyrthosiphon pisum] >gi|193598835|ref|XP_001951441.1| PREDICTED: similar to CG12341 CG12341-PA [Acyrthosiphon pisum]
BT_Q_SG_ZJU_Unigene1001	gi|115931431|ref|XP_001185218.1|	6.00E-13	PREDICTED: similar to Syne-1B [Strongylocentrotus purpuratus]
BT_Q_SG_ZJU_Unigene1004	gi|91081433|ref|XP_973525.1|	1.00E-34	PREDICTED: similar to CG6769 CG6769-PA [Tribolium castaneum]
BT_Q_SG_ZJU_Unigene1005	gi|189241794|ref|XP_976078.2|	3.00E-24	PREDICTED: similar to GA20484-PA isoform 2 [Tribolium castaneum]
BT_Q_SG_ZJU_Unigene1014	gi|66517499|ref|XP_624424.1|	2.00E-27	PREDICTED: similar to RAB, member of RAS oncogene family-like 3 [Apis mellifera]
BT_Q_SG_ZJU_Unigene1015	gi|29169172|gb|AAO66461.1|	2.00E-06	pG1 protein [Homo sapiens]
BT_Q_SG_ZJU_Unigene1021	gi|189239495|ref|XP_975513.2|	1.00E-101	PREDICTED: similar to CG3605 CG3605-PA [Tribolium castaneum]
BT_Q_SG_ZJU_Unigene1025	gi|239790426|dbj|BAH71777.1|	2.00E-18	ACYPI009248 [Acyrthosiphon pisum]
BT_Q_SG_ZJU_Unigene1035	gi|110759486|ref|XP_624668.2|	2.00E-49	PREDICTED: similar to CG11266-PB, isoform B [Apis mellifera]
BT_Q_SG_ZJU_Unigene1036	gi|66508517|ref|XP_624862.1|	2.00E-67	PREDICTED: similar to F-actin capping protein subunit alpha [Apis mellifera]
BT_Q_SG_ZJU_Unigene1037	gi|292629735|ref|XP_002667543.1|	9.00E-18	PREDICTED: organelle division protein FtsZ-like [Danio rerio]
BT_Q_SG_ZJU_Unigene1039	gi|225709874|gb|ACO10783.1|	9.00E-07	Viral IAP-associated factor homolog [Caligus rogercresseyi]
BT_Q_SG_ZJU_Unigene1040	gi|301630589|ref|XP_002944399.1|	1.00E-07	PREDICTED: enolase-like [Xenopus (Silurana) tropicalis]
BT_Q_SG_ZJU_Unigene1043	gi|291415306|ref|XP_002723895.1|	1.00E-11	PREDICTED: hypothetical protein [Oryctolagus cuniculus]
BT_Q_SG_ZJU_Unigene1048	gi|170040309|ref|XP_001847946.1|	3.00E-18	tyrosyl-dna phosphodiesterase [Culex quinquefasciatus] >gi|167863873|gb|EDS27256.1| tyrosyl-dna phosphodiesterase [Culex quinquefasciatus]
BT_Q_SG_ZJU_Unigene1049	gi|91094221|ref|XP_973281.1|	1.00E-131	PREDICTED: similar to COP9 complex homolog subunit 6 CG6932-PA [Tribolium castaneum]
BT_Q_SG_ZJU_Unigene1053	gi|156542122|ref|XP_001601774.1|	7.00E-53	PREDICTED: similar to metaxin [Nasonia vitripennis]
BT_Q_SG_ZJU_Unigene1054	gi|193654837|ref|XP_001951546.1|	1.00E-56	PREDICTED: similar to retinol dehydrogenase 11 [Acyrthosiphon pisum]
BT_Q_SG_ZJU_Unigene1062	gi|157105546|ref|XP_001648917.1|	2.00E-08	hypothetical protein AaeL_AAEL014517 [Aedes aegypti] >gi|108868998|gb|EAT33223.1| conserved hypothetical protein [Aedes aegypti]
BT_Q_SG_ZJU_Unigene1065	gi|156550346|ref|XP_001606975.1|	8.00E-85	PREDICTED: similar to 26S proteasome regulatory complex subunit RPN11 [Nasonia vitripennis]
BT_Q_SG_ZJU_Unigene1067	gi|91076160|ref|XP_966582.1|	4.00E-49	PREDICTED: similar to ubiquilin-1 isoform 1 [Tribolium castaneum]
BT_Q_SG_ZJU_Unigene1069	gi|242117896|ref|NP_001155980.1|	5.00E-31	growth arrest and DNA-damage-inducible, gamma interacting protein 1 [Acyrthosiphon pisum] >gi|239799470|dbj|BAH70654.1| ACYPI48967 [Acyrthosiphon pisum]
BT_Q_SG_ZJU_Unigene1070	gi|193666972|ref|XP_001944972.1|	1.00E-139	PREDICTED: similar to AGAP008881-PA [Acyrthosiphon pisum]
BT_Q_SG_ZJU_Unigene1071	gi|121511952|gb|ABM55427.1|	4.00E-23	conserved secreted salivary protein [Xenopsylla cheopis]
BT_Q_SG_ZJU_Unigene1075	gi|193624920|ref|XP_001948288.1|	4.00E-10	PREDICTED: similar to RAS and EF-hand domain-containing protein homolog [Acyrthosiphon pisum]
BT_Q_SG_ZJU_Unigene1078	gi|156553655|ref|XP_001600547.1|	1.00E-20	PREDICTED: similar to mitochondrial malate dehydrogenase [Nasonia vitripennis]
BT_Q_SG_ZJU_Unigene1080	gi|158296287|ref|XP_316706.4|	3.00E-13	AGAP006670-PA [Anopheles gambiae str. PEST] >gi|157016439|gb|EAA11416.4| AGAP006670-PA [Anopheles gambiae str. PEST]
BT_Q_SG_ZJU_Unigene1084	gi|239789494|dbj|BAH71369.1|	1.00E-22	ACYPI001023 [Acyrthosiphon pisum] >gi|239789496|dbj|BAH71370.1| ACYPI001023 [Acyrthosiphon pisum] >gi|239789498|dbj|BAH71371.1| ACYPI001023 [Acyrthosiphon pisum] >gi|239789500|dbj|BAH71372.1| ACYPI001023 [Acyrthosiphon pisum]
BT_Q_SG_ZJU_Unigene1088	gi|285310534|emb|CBJ25058.1|	3.00E-14	C. elegans protein C30H6.1d, partially confirmed by transcript evidence [Caenorhabditis elegans]
BT_Q_SG_ZJU_Unigene1090	gi|239791060|dbj|BAH72045.1|	2.00E-07	ACYPI004818 [Acyrthosiphon pisum]
BT_Q_SG_ZJU_Unigene1092	gi|224056975|ref|XP_002190837.1|	4.00E-10	PREDICTED: similar to Prg4 protein [Taeniopygia guttata]
BT_Q_SG_ZJU_Unigene1093	gi|301629924|ref|XP_002944082.1|	2.00E-20	PREDICTED: catalase-like [Xenopus (Silurana) tropicalis]
BT_Q_SG_ZJU_Unigene1098	gi|195054882|ref|XP_001994352.1|	2.00E-09	GH21987 [Drosophila grimshawi] >gi|193896222|gb|EDV95088.1| GH21987 [Drosophila grimshawi]
BT_Q_SG_ZJU_Unigene1099	gi|301631817|ref|XP_002944991.1|	4.00E-07	PREDICTED: glutathione import ATP-binding protein gsiA-like, partial [Xenopus (Silurana) tropicalis]
BT_Q_SG_ZJU_Unigene1101	gi|60678789|gb|AAX33729.1|	4.00E-58	Per a 5 allergen [Periplaneta americana]
BT_Q_SG_ZJU_Unigene1102	gi|193580206|ref|XP_001945038.1|	1.00E-56	PREDICTED: similar to mitochondrial 28S ribosomal protein S25 [Acyrthosiphon pisum]
BT_Q_SG_ZJU_Unigene1103	gi|91088257|ref|XP_966746.1|	1.00E-165	PREDICTED: similar to proteasome 26S non-ATPase subunit 12 [Tribolium castaneum]
BT_Q_SG_ZJU_Unigene1109	gi|295126671|gb|ADF80270.1|	4.00E-18	17-beta hydroxysteroid dehydrogenase 12 [Haliotis diversicolor supertexta]
BT_Q_SG_ZJU_Unigene1119	gi|193671783|ref|XP_001944699.1|	1.00E-123	PREDICTED: similar to UDP-glucose glycoprotein:glucosyltransferase [Acyrthosiphon pisum]
BT_Q_SG_ZJU_Unigene1121	gi|148231139|ref|NP_001088441.1|	2.00E-08	eukaryotic translation elongation factor 1 epsilon 1 [Xenopus laevis] >gi|54311191|gb|AAH84764.1| LOC495305 protein [Xenopus laevis]
BT_Q_SG_ZJU_Unigene1122	gi|189236937|ref|XP_970213.2|	8.00E-41	PREDICTED: similar to Uncharacterized protein C1orf149 homolog [Tribolium castaneum]
BT_Q_SG_ZJU_Unigene1123	gi|189235693|ref|XP_966630.2|	1.00E-112	PREDICTED: similar to AGAP005044-PA [Tribolium castaneum]
BT_Q_SG_ZJU_Unigene1126	gi|118793122|ref|XP_320694.3|	4.00E-26	AGAP011820-PA [Anopheles gambiae str. PEST] >gi|116117227|gb|EAA00792.3| AGAP011820-PA [Anopheles gambiae str. PEST]
BT_Q_SG_ZJU_Unigene1127	gi|193598923|ref|XP_001944299.1|	9.00E-39	PREDICTED: similar to eukaryotic translation initiation factor 5 [Acyrthosiphon pisum]
BT_Q_SG_ZJU_Unigene1132	gi|156537934|ref|XP_001608294.1|	1.00E-49	PREDICTED: similar to AT26381p [Nasonia vitripennis]
BT_Q_SG_ZJU_Unigene1133	gi|301629969|ref|XP_002944104.1|	4.00E-08	PREDICTED: threonyl-tRNA synthetase-like [Xenopus (Silurana) tropicalis]
BT_Q_SG_ZJU_Unigene1137	gi|91090033|ref|XP_967923.1|	1.00E-13	PREDICTED: similar to lethal (3) 87Df CG7620-PA [Tribolium castaneum]
BT_Q_SG_ZJU_Unigene1140	gi|66530114|ref|XP_624001.1|	2.00E-51	PREDICTED: similar to DNA-directed RNA polymerase II subunit J (DNA-directed RNA polymerase II 13.3 kDa polypeptide) (RPB11) [Apis mellifera]
BT_Q_SG_ZJU_Unigene1141	gi|114050819|ref|NP_001040347.1|	2.00E-32	salivary secreted ribonuclease [Bombyx mori] >gi|95102584|gb|ABF51230.1| salivary secreted ribonuclease [Bombyx mori]
BT_Q_SG_ZJU_Unigene1142	gi|193666982|ref|XP_001949198.1|	6.00E-68	PREDICTED: similar to AGAP010494-PA [Acyrthosiphon pisum]
BT_Q_SG_ZJU_Unigene1143	gi|292625235|ref|XP_002665935.1|	2.00E-29	PREDICTED: NOP56-like [Danio rerio]
BT_Q_SG_ZJU_Unigene1144	gi|156540278|ref|XP_001599352.1|	5.00E-22	PREDICTED: similar to ENSANGP00000014480 [Nasonia vitripennis]
BT_Q_SG_ZJU_Unigene1147	gi|193704588|ref|XP_001947656.1|	6.00E-45	PREDICTED: similar to zyg-ll homolog B [Acyrthosiphon pisum]
BT_Q_SG_ZJU_Unigene1148	gi|193711453|ref|XP_001950896.1|	2.00E-27	PREDICTED: similar to lola, partial [Acyrthosiphon pisum]
BT_Q_SG_ZJU_Unigene1150	gi|91083225|ref|XP_973597.1|	1.00E-50	PREDICTED: similar to CG7371 CG7371-PA [Tribolium castaneum]
BT_Q_SG_ZJU_Unigene1151	gi|195432545|ref|XP_002064277.1|	8.00E-08	GK19787 [Drosophila willistoni] >gi|194160362|gb|EDW75263.1| GK19787 [Drosophila willistoni]
BT_Q_SG_ZJU_Unigene1154	gi|2120083|pir||I38588	2.00E-78	reverse transcriptase homolog - human retrotransposon L1 >gi|483916|gb|AAB60345.1| ORF2 [Homo sapiens]
BT_Q_SG_ZJU_Unigene1168	gi|66540009|ref|XP_624438.1|	1.00E-113	PREDICTED: similar to CG5642-PA [Apis mellifera]
BT_Q_SG_ZJU_Unigene1171	gi|189235480|ref|XP_967613.2|	1.00E-20	PREDICTED: similar to CG11563 CG11563-PA [Tribolium castaneum]
BT_Q_SG_ZJU_Unigene1172	gi|156541240|ref|XP_001600736.1|	8.00E-75	PREDICTED: similar to proteasome beta 2 subunit-like protein [Nasonia vitripennis]
BT_Q_SG_ZJU_Unigene1175	gi|66520405|ref|XP_395262.2|	1.00E-16	PREDICTED: similar to CG9853-PA [Apis mellifera]
BT_Q_SG_ZJU_Unigene1176	gi|195430362|ref|XP_002063225.1|	4.00E-41	GK21505 [Drosophila willistoni] >gi|194159310|gb|EDW74211.1| GK21505 [Drosophila willistoni]
BT_Q_SG_ZJU_Unigene1177	gi|156549957|ref|XP_001603224.1|	1.00E-107	PREDICTED: similar to ENSANGP00000016848 [Nasonia vitripennis]
BT_Q_SG_ZJU_Unigene1179	gi|189234573|ref|XP_974489.2|	1.00E-107	PREDICTED: similar to Ankyrin repeat domain-containing protein 17 (Gene trap ankyrin repeat protein) (Serologically defined breast cancer antigen NY-BR-16) [Tribolium castaneum]
BT_Q_SG_ZJU_Unigene1183	gi|118099658|ref|XP_429506.2|	6.00E-44	PREDICTED: similar to SJCHGC03982 protein [Gallus gallus]
BT_Q_SG_ZJU_Unigene1196	gi|91080663|ref|XP_974713.1|	5.00E-72	PREDICTED: similar to Noa36 CG10009-PA [Tribolium castaneum]
BT_Q_SG_ZJU_Unigene1199	gi|73947650|ref|XP_867118.1|	1.00E-102	PREDICTED: similar to suppressor of Ty 5 homolog isoform 2 [Canis familiaris]
BT_Q_SG_ZJU_Unigene1201	gi|193580079|ref|XP_001952371.1|	3.00E-47	PREDICTED: similar to immature colon carcinoma [Acyrthosiphon pisum]
BT_Q_SG_ZJU_Unigene1203	gi|225711690|gb|ACO11691.1|	3.00E-09	ORF91 [Caligus rogercresseyi]
BT_Q_SG_ZJU_Unigene1204	gi|110749750|ref|XP_624152.2|	0	PREDICTED: similar to CG9977-PA [Apis mellifera]
BT_Q_SG_ZJU_Unigene1206	gi|195339170|ref|XP_002036193.1|	9.00E-27	GM16890 [Drosophila sechellia] >gi|194130073|gb|EDW52116.1| GM16890 [Drosophila sechellia]
BT_Q_SG_ZJU_Unigene1210	gi|158287481|ref|XP_309502.3|	4.00E-30	AGAP011146-PA [Anopheles gambiae str. PEST] >gi|157019671|gb|EAA05152.3| AGAP011146-PA [Anopheles gambiae str. PEST]
BT_Q_SG_ZJU_Unigene1213	gi|225708936|gb|ACO10314.1|	5.00E-15	CAAX prenyl protease 1 homolog [Caligus rogercresseyi]
BT_Q_SG_ZJU_Unigene1214	gi|66520070|ref|XP_625206.1|	6.00E-52	PREDICTED: similar to FRG1 protein homolog [Apis mellifera]
BT_Q_SG_ZJU_Unigene1219	gi|91090890|ref|XP_973414.1|	1.00E-98	PREDICTED: similar to RE62270p [Tribolium castaneum]
BT_Q_SG_ZJU_Unigene1221	gi|91083109|ref|XP_969777.1|	8.00E-44	PREDICTED: similar to CG33332 CG33332-PA [Tribolium castaneum]
BT_Q_SG_ZJU_Unigene1225	gi|118788778|ref|XP_316970.3|	3.00E-48	AGAP008475-PA [Anopheles gambiae str. PEST] >gi|116122909|gb|EAA12661.3| AGAP008475-PA [Anopheles gambiae str. PEST]
BT_Q_SG_ZJU_Unigene1229	gi|76253908|ref|NP_998277.2|	2.00E-71	geranylgeranyl transferase type-2 subunit beta [Danio rerio] >gi|66911331|gb|AAH97066.1| Rab geranylgeranyltransferase, beta subunit [Danio rerio] >gi|123235924|emb|CAM15111.1| novel protein similar to vertebrate Rab geranylgeranyltransferase, beta subunit (RABGGTB, zgc:56443) [Danio rerio] >gi|182891470|gb|AAI64578.1| Rabggtb protein [Danio rerio]
BT_Q_SG_ZJU_Unigene1231	gi|111380719|gb|ABH09735.1|	0	heat shock cognate 70 protein [Trichoplusia ni]
BT_Q_SG_ZJU_Unigene1232	gi|156538020|ref|XP_001608209.1|	5.00E-35	PREDICTED: similar to protease m1 zinc metalloprotease [Nasonia vitripennis]
BT_Q_SG_ZJU_Unigene1233	gi|193709150|ref|XP_001943581.1|	9.00E-83	PREDICTED: similar to GA18131-PA [Acyrthosiphon pisum]
BT_Q_SG_ZJU_Unigene1238	gi|239789950|dbj|BAH71568.1|	5.00E-21	ACYPI009559 [Acyrthosiphon pisum]
BT_Q_SG_ZJU_Unigene1241	gi|110755704|ref|XP_001122454.1|	1.00E-17	PREDICTED: similar to Cysteine-rich protein 1 (Cysteine-rich intestinal protein) (CRIP) [Apis mellifera]
BT_Q_SG_ZJU_Unigene1243	gi|239789736|dbj|BAH71471.1|	1.00E-115	ACYPI003384 [Acyrthosiphon pisum]
BT_Q_SG_ZJU_Unigene1249	gi|195019305|ref|XP_001984952.1|	9.00E-21	GH16775 [Drosophila grimshawi] >gi|193898434|gb|EDV97300.1| GH16775 [Drosophila grimshawi]
BT_Q_SG_ZJU_Unigene1250	gi|193678927|ref|XP_001951008.1|	2.00E-27	PREDICTED: similar to endoplasmic reticulum protein erp29 [Acyrthosiphon pisum]
BT_Q_SG_ZJU_Unigene1252	gi|156554467|ref|XP_001604369.1|	4.00E-42	PREDICTED: similar to RE09732p [Nasonia vitripennis]
BT_Q_SG_ZJU_Unigene1268	gi|157132710|ref|XP_001662622.1|	7.00E-83	ubiquitin-protein ligase [Aedes aegypti] >gi|108871099|gb|EAT35324.1| ubiquitin-protein ligase [Aedes aegypti]
BT_Q_SG_ZJU_Unigene1284	gi|112983332|ref|NP_001037648.1|	3.00E-33	eIF2B-alpha protein [Bombyx mori] >gi|110174935|gb|ABG54282.1| eIF2B-alpha protein [Bombyx mori]
BT_Q_SG_ZJU_Unigene1285	gi|291228011|ref|XP_002733974.1|	2.00E-17	PREDICTED: synaptotagmin IX-like, partial [Saccoglossus kowalevskii]
BT_Q_SG_ZJU_Unigene1289	gi|37654240|gb|AAQ96225.1|	3.00E-08	LRRGT00012 [Rattus norvegicus] >gi|149047838|gb|EDM00454.1| LRRGT00012 [Rattus norvegicus]
BT_Q_SG_ZJU_Unigene1296	gi|195135143|ref|XP_002011994.1|	6.00E-35	GI16716 [Drosophila mojavensis] >gi|193918258|gb|EDW17125.1| GI16716 [Drosophila mojavensis]
BT_Q_SG_ZJU_Unigene1299	gi|226533687|ref|NP_001152775.1|	2.00E-69	venom serine carboxypeptidase [Apis mellifera] >gi|224959857|gb|ACN71203.1| venom serine carboxypeptidase precursor [Apis mellifera]
BT_Q_SG_ZJU_Unigene1300	gi|193639987|ref|XP_001946399.1|	2.00E-47	PREDICTED: similar to LOC445827 protein [Acyrthosiphon pisum]
BT_Q_SG_ZJU_Unigene1302	gi|229487404|emb|CAY54138.1|	1.00E-111	DnaJ domain containing protein [Heliconius melpomene]
BT_Q_SG_ZJU_Unigene1306	gi|193582433|ref|XP_001943746.1|	2.00E-27	PREDICTED: similar to polyprotein [Acyrthosiphon pisum]
BT_Q_SG_ZJU_Unigene1314	gi|298204349|gb|ADI61823.1|	8.00E-30	endonuclease-reverse transcriptase [Bombyx mori]
BT_Q_SG_ZJU_Unigene1315	gi|156543660|ref|XP_001605104.1|	3.00E-38	PREDICTED: similar to DNA topoisomerase type I [Nasonia vitripennis]
BT_Q_SG_ZJU_Unigene1316	gi|190407685|gb|ACE78271.1|	4.00E-52	vacuolar ATPase B subunit [Bombyx mori]
BT_Q_SG_ZJU_Unigene1320	gi|115496001|ref|NP_001068939.1|	8.00E-28	ankyrin repeat domain-containing protein 39 [Bos taurus] >gi|122142175|sp|Q0P5B9.1|ANR39_BOVIN RecName: Full=Ankyrin repeat domain-containing protein 39 >gi|112362226|gb|AAI20255.1| Ankyrin repeat domain 39 [Bos taurus] >gi|296482796|gb|DAA24911.1| ankyrin repeat domain-containing protein 39 [Bos taurus]
BT_Q_SG_ZJU_Unigene1323	gi|167393978|ref|XP_001740788.1|	4.00E-06	hypothetical protein [Entamoeba dispar SAW760] >gi|165894878|gb|EDR22710.1| hypothetical protein, conserved [Entamoeba dispar SAW760]
BT_Q_SG_ZJU_Unigene1324	gi|91085931|ref|XP_970194.1|	1.00E-116	PREDICTED: similar to proteasome subunit beta type 5,8 [Tribolium castaneum]
BT_Q_SG_ZJU_Unigene1329	gi|187177323|ref|NP_001119639.1|	1.00E-52	Sec61 alpha 1 subunit [Acyrthosiphon pisum] >gi|52630957|gb|AAU84942.1| probable transport protein Sec61 alpha subunit [Toxoptera citricida]
BT_Q_SG_ZJU_Unigene1335	gi|193598879|ref|XP_001952077.1|	1.00E-110	PREDICTED: similar to enoyl-CoA hydratase precursor 1 [Acyrthosiphon pisum]
BT_Q_SG_ZJU_Unigene1340	gi|33285936|gb|AAQ01583.1|	6.00E-08	reverse transcriptase [Aedes albopictus]
BT_Q_SG_ZJU_Unigene1341	gi|110749260|ref|XP_001121239.1|	3.00E-17	PREDICTED: similar to WD repeat domain 23 isoform 2 [Apis mellifera]
BT_Q_SG_ZJU_Unigene1347	gi|91085589|ref|XP_968685.1|	1.00E-164	PREDICTED: similar to selenophosphate synthetase [Tribolium castaneum]
BT_Q_SG_ZJU_Unigene1348	gi|66363186|ref|XP_628559.1|	4.00E-22	cryptopsoridial mucin, large thr stretch, signal peptide sequence [Cryptosporidium parvum Iowa II] >gi|46229571|gb|EAK90389.1| cryptopsoridial mucin, large thr stretch, signal peptide sequence [Cryptosporidium parvum Iowa II]
BT_Q_SG_ZJU_Unigene1351	gi|239788503|dbj|BAH70927.1|	7.00E-44	ACYPI008939 [Acyrthosiphon pisum]
BT_Q_SG_ZJU_Unigene1355	gi|157106577|ref|XP_001649386.1|	7.00E-53	myo inositol monophosphatase [Aedes aegypti] >gi|108879805|gb|EAT44030.1| myo inositol monophosphatase [Aedes aegypti]
BT_Q_SG_ZJU_Unigene1357	gi|110757793|ref|XP_001120416.1|	6.00E-30	PREDICTED: similar to RNA polymerase I 135kD subunit CG4033-PA [Apis mellifera]
BT_Q_SG_ZJU_Unigene1358	gi|193657147|ref|XP_001952785.1|	4.00E-95	PREDICTED: similar to beta1,4 mannosyltransferase [Acyrthosiphon pisum]
BT_Q_SG_ZJU_Unigene1359	gi|194206404|ref|XP_001492337.2|	1.00E-15	PREDICTED: similar to cathepsin H transcript [Equus caballus]
BT_Q_SG_ZJU_Unigene1361	gi|193606203|ref|XP_001947841.1|	2.00E-31	PREDICTED: similar to zinc finger CCCH-type containing 10 [Acyrthosiphon pisum]
BT_Q_SG_ZJU_Unigene1362	gi|201023319|ref|NP_001128401.1|	4.00E-46	cathepsin B-10270 [Acyrthosiphon pisum] >gi|239788119|dbj|BAH70754.1| ACYPI000021 [Acyrthosiphon pisum]
BT_Q_SG_ZJU_Unigene1371	gi|110756457|ref|XP_623571.2|	2.00E-34	PREDICTED: similar to Suppressor of variegation 2-10 CG8068-PI, isoform I [Apis mellifera]
BT_Q_SG_ZJU_Unigene1373	gi|194902066|ref|XP_001980572.1|	4.00E-49	GG18100 [Drosophila erecta] >gi|190652275|gb|EDV49530.1| GG18100 [Drosophila erecta]
BT_Q_SG_ZJU_Unigene1375	gi|149716947|ref|XP_001501045.1|	2.00E-19	PREDICTED: trehalase (brush-border membrane glycoprotein) [Equus caballus]
BT_Q_SG_ZJU_Unigene1378	gi|91083309|ref|XP_974698.1|	5.00E-35	PREDICTED: similar to X-prolyl aminopeptidase (aminopeptidase P) 1, soluble [Tribolium castaneum]
BT_Q_SG_ZJU_Unigene1381	gi|74857292|sp|Q552S7.1|Y5913_DICDI	1.00E-49	RecName: Full=Putative acetyltransferase DDB_G0275913
BT_Q_SG_ZJU_Unigene1383	gi|91078880|ref|XP_972914.1|	9.00E-24	PREDICTED: similar to THUMP domain-containing protein 1 [Tribolium castaneum]
BT_Q_SG_ZJU_Unigene1384	gi|156551676|ref|XP_001601439.1|	1.00E-07	PREDICTED: similar to beclin [Nasonia vitripennis]
BT_Q_SG_ZJU_Unigene1385	gi|239788224|dbj|BAH70800.1|	1.00E-42	ACYPI007484 [Acyrthosiphon pisum] >gi|239788226|dbj|BAH70801.1| ACYPI007484 [Acyrthosiphon pisum]
BT_Q_SG_ZJU_Unigene1387	gi|110755004|ref|XP_001120009.1|	5.00E-34	PREDICTED: similar to lethal (2) k03203 CG3450-PA [Apis mellifera]
BT_Q_SG_ZJU_Unigene1390	gi|221112127|ref|XP_002159169.1|	2.00E-07	PREDICTED: similar to T20F10.4 [Hydra magnipapillata]
BT_Q_SG_ZJU_Unigene1392	gi|66520165|ref|XP_623053.1|	1.00E-154	PREDICTED: similar to 26S protease regulatory subunit 8 isoform 1 [Apis mellifera] >gi|66520175|ref|XP_623187.1| PREDICTED: similar to 26S protease regulatory subunit 8 isoform 2 [Apis mellifera]
BT_Q_SG_ZJU_Unigene1394	gi|48132928|ref|XP_393328.1|	1.00E-99	PREDICTED: similar to epsilon subunit of coatomer protein complex isoform a [Apis mellifera]
BT_Q_SG_ZJU_Unigene1395	gi|110757741|ref|XP_397089.3|	2.00E-29	PREDICTED: similar to CG31133-PA [Apis mellifera]
BT_Q_SG_ZJU_Unigene1396	gi|40795236|gb|AAR91274.1|	1.00E-116	cytochrome c oxidase subunit II [Homo sapiens]
BT_Q_SG_ZJU_Unigene1397	gi|239791210|dbj|BAH72103.1|	4.00E-68	ACYPI001532 [Acyrthosiphon pisum]
BT_Q_SG_ZJU_Unigene1398	gi|91083669|ref|XP_968061.1|	2.00E-41	PREDICTED: similar to transmembrane 9 superfamily protein member 4 [Tribolium castaneum]
BT_Q_SG_ZJU_Unigene1399	gi|91089945|ref|XP_973312.1|	2.00E-34	PREDICTED: similar to eukaryotic translation initiation factor 3, theta subunit [Tribolium castaneum]
BT_Q_SG_ZJU_Unigene1400	gi|283046736|ref|NP_001164315.1|	7.00E-85	NADH:ubiquinone reductase 23kD subunit precursor [Tribolium castaneum]
BT_Q_SG_ZJU_Unigene1403	gi|21068659|emb|CAD21558.1|	1.00E-67	HEL protein [Chironomus tentans]
BT_Q_SG_ZJU_Unigene1404	gi|189236122|ref|XP_974348.2|	1.00E-78	PREDICTED: similar to GA13736-PA [Tribolium castaneum]
BT_Q_SG_ZJU_Unigene1407	gi|91091374|ref|XP_973014.1|	1.00E-142	PREDICTED: similar to AGAP012335-PA [Tribolium castaneum]
BT_Q_SG_ZJU_Unigene1411	gi|91080725|ref|XP_975392.1|	1.00E-115	PREDICTED: similar to arginyl-tRNA synthetase [Tribolium castaneum]
BT_Q_SG_ZJU_Unigene1412	gi|195445019|ref|XP_002070135.1|	6.00E-15	GK11887 [Drosophila willistoni] >gi|194166220|gb|EDW81121.1| GK11887 [Drosophila willistoni]
BT_Q_SG_ZJU_Unigene1415	gi|157133635|ref|XP_001662951.1|	0	endoplasmin [Aedes aegypti] >gi|108870754|gb|EAT34979.1| endoplasmin [Aedes aegypti]
BT_Q_SG_ZJU_Unigene1416	gi|158302227|ref|XP_321827.4|	5.00E-10	AGAP001319-PA [Anopheles gambiae str. PEST] >gi|157012849|gb|EAA01774.4| AGAP001319-PA [Anopheles gambiae str. PEST]
BT_Q_SG_ZJU_Unigene1418	gi|239791178|dbj|BAH72091.1|	2.00E-39	ACYPI007817 [Acyrthosiphon pisum]
BT_Q_SG_ZJU_Unigene1420	gi|218436706|dbj|BAH03386.1|	5.00E-40	acetyltransferase 1 [Ostrinia scapulalis]
BT_Q_SG_ZJU_Unigene1421	gi|194762710|ref|XP_001963477.1|	1.00E-16	GF20422 [Drosophila ananassae] >gi|190629136|gb|EDV44553.1| GF20422 [Drosophila ananassae]
BT_Q_SG_ZJU_Unigene1422	gi|91078850|ref|XP_971848.1|	1.00E-109	PREDICTED: similar to tan CG12120-PA [Tribolium castaneum]
BT_Q_SG_ZJU_Unigene1423	gi|156547510|ref|XP_001603936.1|	0	PREDICTED: similar to 26S proteasome regulatory complex ATPase RPT4 [Nasonia vitripennis]
BT_Q_SG_ZJU_Unigene1424	gi|118786837|ref|XP_315690.3|	6.00E-66	AGAP005673-PA [Anopheles gambiae str. PEST] >gi|116126513|gb|EAA11809.3| AGAP005673-PA [Anopheles gambiae str. PEST]
BT_Q_SG_ZJU_Unigene1425	gi|215422331|ref|NP_001135855.1|	3.00E-41	adenosine deaminase, tRNA-specific 2, TAD2 homolog [Nasonia vitripennis]
BT_Q_SG_ZJU_Unigene1429	gi|118789164|ref|XP_317248.3|	6.00E-77	AGAP008224-PA [Anopheles gambiae str. PEST] >gi|45581691|tpg|DAA02245.1| TPA_exp: RAS-like family 11 member A [Anopheles gambiae] >gi|116123090|gb|EAA12476.3| AGAP008224-PA [Anopheles gambiae str. PEST]
BT_Q_SG_ZJU_Unigene1430	gi|170052104|ref|XP_001862070.1|	6.00E-32	ubiquitin-conjugating enzyme E2 C [Culex quinquefasciatus] >gi|167873095|gb|EDS36478.1| ubiquitin-conjugating enzyme E2 C [Culex quinquefasciatus]
BT_Q_SG_ZJU_Unigene1433	gi|115651374|ref|XP_001193565.1|	7.00E-25	PREDICTED: similar to Eukaryotic translation initiation factor 3, subunit 2 beta, partial [Strongylocentrotus purpuratus] >gi|115675839|ref|XP_794303.2| PREDICTED: similar to Eukaryotic translation initiation factor 3, subunit 2 beta, partial [Strongylocentrotus purpuratus]
BT_Q_SG_ZJU_Unigene1434	gi|272876767|gb|ACZ96371.1|	1.00E-40	ion transport protein isoform B [Rhodnius prolixus]
BT_Q_SG_ZJU_Unigene1436	gi|193713557|ref|XP_001948721.1|	4.00E-63	PREDICTED: similar to AGAP009694-PA [Acyrthosiphon pisum]
BT_Q_SG_ZJU_Unigene1437	gi|195345579|ref|XP_002039346.1|	2.00E-17	GM22931 [Drosophila sechellia] >gi|194134572|gb|EDW56088.1| GM22931 [Drosophila sechellia]
BT_Q_SG_ZJU_Unigene1438	gi|66509665|ref|XP_397030.2|	1.00E-143	PREDICTED: similar to bystin isoform 1 [Apis mellifera]
BT_Q_SG_ZJU_Unigene1439	gi|156550087|ref|XP_001605577.1|	2.00E-35	PREDICTED: similar to CG13348-PA [Nasonia vitripennis]
BT_Q_SG_ZJU_Unigene1440	gi|156543800|ref|XP_001606461.1|	7.00E-73	PREDICTED: similar to signal recognition particle [Nasonia vitripennis]
BT_Q_SG_ZJU_Unigene1442	gi|237874274|ref|NP_001153877.1|	1.00E-140	calpain-B [Apis mellifera]
BT_Q_SG_ZJU_Unigene1443	gi|189241794|ref|XP_976078.2|	1.00E-106	PREDICTED: similar to GA20484-PA isoform 2 [Tribolium castaneum]
BT_Q_SG_ZJU_Unigene1444	gi|156541126|ref|XP_001601669.1|	3.00E-83	PREDICTED: similar to ribophorin ii [Nasonia vitripennis]
BT_Q_SG_ZJU_Unigene1446	gi|194909828|ref|XP_001982018.1|	1.00E-147	GG12360 [Drosophila erecta] >gi|190656656|gb|EDV53888.1| GG12360 [Drosophila erecta]
BT_Q_SG_ZJU_Unigene1447	gi|193662250|ref|XP_001949956.1|	1.00E-90	PREDICTED: similar to translocation protein 1 [Acyrthosiphon pisum]
BT_Q_SG_ZJU_Unigene1450	gi|66518019|ref|XP_623848.1|	2.00E-60	PREDICTED: similar to Peptidyl-prolyl cis-trans isomerase E (PPIase E) (Rotamase E) (Cyclophilin E) (Cyclophilin 33) isoform 1 [Apis mellifera]
BT_Q_SG_ZJU_Unigene1452	gi|91090224|ref|XP_968385.1|	1.00E-08	PREDICTED: similar to UPF0466 protein CG17680, mitochondrial [Tribolium castaneum]
BT_Q_SG_ZJU_Unigene1454	gi|239799358|dbj|BAH70603.1|	5.00E-26	ACYPI005265 [Acyrthosiphon pisum]
BT_Q_SG_ZJU_Unigene1458	gi|209571484|ref|NP_001129372.1|	2.00E-30	ADP-ribosylation factor GTPase activating protein 2 [Acyrthosiphon pisum]
BT_Q_SG_ZJU_Unigene1459	gi|296207611|ref|XP_002750699.1|	1.00E-127	PREDICTED: CAAX prenyl protease 1 homolog [Callithrix jacchus]
BT_Q_SG_ZJU_Unigene1461	gi|20385030|gb|AAM21161.1|AF162672_1	6.00E-13	natural killer cell-specific antigen KLIP1 [Homo sapiens]
BT_Q_SG_ZJU_Unigene1463	gi|195445129|ref|XP_002070186.1|	4.00E-45	GK11918 [Drosophila willistoni] >gi|194166271|gb|EDW81172.1| GK11918 [Drosophila willistoni]
BT_Q_SG_ZJU_Unigene1465	gi|237761908|emb|CAR94540.1|	1.00E-61	baiser CG11785-PA protein [Blattella germanica]
BT_Q_SG_ZJU_Unigene1467	gi|156554395|ref|XP_001603456.1|	1.00E-161	PREDICTED: similar to dual specificity mitogen-activated protein kinase kinase 4 MAPKK4 [Nasonia vitripennis]
BT_Q_SG_ZJU_Unigene1472	gi|268578395|ref|XP_002644180.1|	6.00E-14	Hypothetical protein CBG17156 [Caenorhabditis briggsae] >gi|187025967|emb|CAP34960.1| Hypothetical protein CBG17156 [Caenorhabditis briggsae]
BT_Q_SG_ZJU_Unigene1473	gi|158285553|ref|XP_001687910.1|	6.00E-23	AGAP007507-PA [Anopheles gambiae str. PEST] >gi|157020047|gb|EDO64559.1| AGAP007507-PA [Anopheles gambiae str. PEST]
BT_Q_SG_ZJU_Unigene1475	gi|195330895|ref|XP_002032138.1|	7.00E-42	GM23676 [Drosophila sechellia] >gi|194121081|gb|EDW43124.1| GM23676 [Drosophila sechellia]
BT_Q_SG_ZJU_Unigene1476	gi|295393298|gb|ADG03469.1|	1.00E-117	heat shock protein 90 [Bemisia tabaci]
BT_Q_SG_ZJU_Unigene1477	gi|91084059|ref|XP_967515.1|	0	PREDICTED: similar to GTP-binding protein [Tribolium castaneum]
BT_Q_SG_ZJU_Unigene1478	gi|301753857|ref|XP_002912833.1|	2.00E-27	PREDICTED: DET1- and DDB1-associated protein 1-like [Ailuropoda melanoleuca]
BT_Q_SG_ZJU_Unigene1479	gi|91085239|ref|XP_973002.1|	1.00E-137	PREDICTED: similar to 26S proteasome subunit [Tribolium castaneum]
BT_Q_SG_ZJU_Unigene1481	gi|193582540|ref|XP_001946425.1|	1.00E-87	PREDICTED: similar to programmed cell death [Acyrthosiphon pisum]
BT_Q_SG_ZJU_Unigene1482	gi|66552210|ref|XP_625168.1|	1.00E-63	PREDICTED: similar to CG6859-PA [Apis mellifera]
BT_Q_SG_ZJU_Unigene1487	gi|91094669|ref|XP_972505.1|	5.00E-48	PREDICTED: similar to osm-1 CG13809-PA [Tribolium castaneum]
BT_Q_SG_ZJU_Unigene1488	gi|170052260|ref|XP_001862141.1|	1.00E-49	syntaxin-8 [Culex quinquefasciatus] >gi|167873166|gb|EDS36549.1| syntaxin-8 [Culex quinquefasciatus]
BT_Q_SG_ZJU_Unigene1489	gi|156541244|ref|XP_001600833.1|	2.00E-30	PREDICTED: similar to Ornithine decarboxylase antizyme (ODC-Az), partial [Nasonia vitripennis]
BT_Q_SG_ZJU_Unigene1491	gi|156553813|ref|XP_001604886.1|	0	PREDICTED: similar to 26S protease regulatory subunit 6a [Nasonia vitripennis]
BT_Q_SG_ZJU_Unigene1492	gi|14860969|gb|AAK72378.1|	7.00E-47	60S ribosomal protein L7/L12 precursor [Spodoptera frugiperda]
BT_Q_SG_ZJU_Unigene1493	gi|91084043|ref|XP_967085.1|	0	PREDICTED: similar to AGAP001884-PA [Tribolium castaneum]
BT_Q_SG_ZJU_Unigene1494	gi|66500931|ref|XP_624282.1|	2.00E-51	PREDICTED: similar to von Hippel-Lindau binding protein 1 [Apis mellifera]
BT_Q_SG_ZJU_Unigene1496	gi|110768098|ref|XP_395256.3|	0	PREDICTED: similar to eukaryotic initiation factor 5C CG2922-PG, isoform G [Apis mellifera]
BT_Q_SG_ZJU_Unigene1497	gi|229577115|ref|NP_001153430.1|	1.00E-166	casein kinase II alpha subunit [Nasonia vitripennis] >gi|229577119|ref|NP_001153431.1| casein kinase II alpha subunit [Nasonia vitripennis]
BT_Q_SG_ZJU_Unigene1498	gi|193654837|ref|XP_001951546.1|	7.00E-71	PREDICTED: similar to retinol dehydrogenase 11 [Acyrthosiphon pisum]
BT_Q_SG_ZJU_Unigene1499	gi|215820608|ref|NP_001135963.1|	9.00E-33	autophagy related protein Atg12-like protein [Bombyx mori] >gi|213390048|gb|ACJ46063.1| autophagy related protein Atg12-like protein [Bombyx mori]
BT_Q_SG_ZJU_Unigene1521	gi|301629813|ref|XP_002944028.1|	2.00E-12	PREDICTED: 50S ribosomal protein L28-like [Xenopus (Silurana) tropicalis]
BT_Q_SG_ZJU_Unigene1531	gi|296482303|gb|DAA24418.1|	9.00E-23	serine/threonine-protein phosphatase PP1-beta catalytic subunit [Bos taurus]
BT_Q_SG_ZJU_Unigene1532	gi|291229512|ref|XP_002734712.1|	2.00E-06	PREDICTED: alanyl-tRNA synthetase-like [Saccoglossus kowalevskii]
BT_Q_SG_ZJU_Unigene1546	gi|239793486|dbj|BAH72856.1|	6.00E-17	ACYPI007002 [Acyrthosiphon pisum]
BT_Q_SG_ZJU_Unigene1564	gi|82913692|ref|XP_728737.1|	4.00E-07	inorganic phosphate transporter [Plasmodium yoelii yoelii str. 17XNL] >gi|23485238|gb|EAA20302.1| inorganic phosphate transporter [Plasmodium yoelii yoelii]
BT_Q_SG_ZJU_Unigene1571	gi|91089713|ref|XP_974951.1|	2.00E-18	PREDICTED: similar to ubiquitin specific protease 7 [Tribolium castaneum]
BT_Q_SG_ZJU_Unigene1572	gi|157106533|ref|XP_001649366.1|	6.00E-08	lysyl-tRNA synthetase [Aedes aegypti] >gi|108868817|gb|EAT33042.1| lysyl-tRNA synthetase [Aedes aegypti]
BT_Q_SG_ZJU_Unigene1584	gi|2522237|dbj|BAA22791.1|	7.00E-07	vitellogenin [Athalia rosae]
BT_Q_SG_ZJU_Unigene1593	gi|225713318|gb|ACO12505.1|	4.00E-13	40S ribosomal protein S27 [Lepeophtheirus salmonis]
BT_Q_SG_ZJU_Unigene1609	gi|301631001|ref|XP_002944601.1|	3.00E-09	PREDICTED: uncharacterized protein At5g10860, mitochondrial-like [Xenopus (Silurana) tropicalis]
BT_Q_SG_ZJU_Unigene1614	gi|40457658|gb|AAR86855.1|	6.00E-13	p40 [Homo sapiens]
BT_Q_SG_ZJU_Unigene1625	gi|292629725|ref|XP_002667538.1|	7.00E-12	PREDICTED: lactate dehydrogenase D-like [Danio rerio]
BT_Q_SG_ZJU_Unigene1626	gi|262304917|gb|ACY45051.1|	2.00E-20	clathrin coat assembly protein [Polyzonium germanicum]
BT_Q_SG_ZJU_Unigene1634	gi|110768514|ref|XP_001121993.1|	2.00E-11	PREDICTED: similar to CG5027-PA, partial [Apis mellifera]
BT_Q_SG_ZJU_Unigene1638	gi|193603774|ref|XP_001950066.1|	3.00E-06	PREDICTED: similar to 4A11 antigen; sperm tail membrane antigen [Acyrthosiphon pisum]
BT_Q_SG_ZJU_Unigene1639	gi|221104394|ref|XP_002166485.1|	2.00E-06	PREDICTED: similar to predicted protein [Hydra magnipapillata]
BT_Q_SG_ZJU_Unigene1642	gi|241563357|ref|XP_002401670.1|	1.00E-13	hypothetical protein IscW_ISCW020751 [Ixodes scapularis] >gi|215501862|gb|EEC11356.1| hypothetical protein IscW_ISCW020751 [Ixodes scapularis]
BT_Q_SG_ZJU_Unigene1645	gi|296190199|ref|XP_002743098.1|	1.00E-18	PREDICTED: transitional endoplasmic reticulum ATPase-like [Callithrix jacchus]
BT_Q_SG_ZJU_Unigene1662	gi|83755202|gb|ABC46449.1|	2.00E-13	GST [Lygus lineolaris] >gi|83755204|gb|ABC46450.1| GST [Lygus lineolaris]
BT_Q_SG_ZJU_Unigene1666	gi|48096527|ref|XP_394704.1|	6.00E-10	PREDICTED: similar to Zpr1 CG9060-PA [Apis mellifera]
BT_Q_SG_ZJU_Unigene1667	gi|118382870|ref|XP_001024591.1|	2.00E-06	oxidoreductase, aldo/keto reductase family protein [Tetrahymena thermophila] >gi|89306358|gb|EAS04346.1| oxidoreductase, aldo/keto reductase family protein [Tetrahymena thermophila SB210]
BT_Q_SG_ZJU_Unigene1671	gi|193669092|ref|XP_001944635.1|	1.00E-18	PREDICTED: similar to mKIAA0609 protein [Acyrthosiphon pisum]
BT_Q_SG_ZJU_Unigene1681	gi|239787976|dbj|BAH70686.1|	6.00E-16	ACYPI004831 [Acyrthosiphon pisum]
BT_Q_SG_ZJU_Unigene1683	gi|301630305|ref|XP_002944262.1|	7.00E-07	PREDICTED: thioredoxin-like [Xenopus (Silurana) tropicalis]
BT_Q_SG_ZJU_Unigene1684	gi|225717770|gb|ACO14731.1|	7.00E-10	Cathepsin B precursor [Caligus clemensi]
BT_Q_SG_ZJU_Unigene1693	gi|297681047|ref|XP_002818294.1|	8.00E-24	PREDICTED: collagen alpha-2(I) chain-like [Pongo abelii]
BT_Q_SG_ZJU_Unigene1700	gi|301631401|ref|XP_002944786.1|	8.00E-06	PREDICTED: UPF0065 protein in tcbD-tcbE intergenic region-like [Xenopus (Silurana) tropicalis]
BT_Q_SG_ZJU_Unigene1701	gi|156553177|ref|XP_001602416.1|	8.00E-08	PREDICTED: similar to translational activator gcn1 [Nasonia vitripennis]
BT_Q_SG_ZJU_Unigene1708	gi|195425413|ref|XP_002061003.1|	1.00E-15	GK10712 [Drosophila willistoni] >gi|194157088|gb|EDW71989.1| GK10712 [Drosophila willistoni]
BT_Q_SG_ZJU_Unigene1711	gi|189239129|ref|XP_971353.2|	2.00E-11	PREDICTED: similar to Transmembrane protein 50B (HCV p7-trans-regulated protein 3) [Tribolium castaneum]
BT_Q_SG_ZJU_Unigene1724	gi|146167652|ref|XP_001016188.2|	5.00E-08	ABC transporter family protein [Tetrahymena thermophila] >gi|146145286|gb|EAR95943.2| ABC transporter family protein [Tetrahymena thermophila SB210]
BT_Q_SG_ZJU_Unigene1727	gi|297470483|ref|XP_002683978.1|	3.00E-06	PREDICTED: hypothetical protein, partial [Bos taurus] >gi|296491779|gb|DAA33812.1| hypothetical protein BOS_402 [Bos taurus]
BT_Q_SG_ZJU_Unigene1734	gi|296196619|ref|XP_002745917.1|	2.00E-22	PREDICTED: heterogeneous nuclear ribonucleoproteins A2/B1-like [Callithrix jacchus]
BT_Q_SG_ZJU_Unigene1737	gi|156543078|ref|XP_001605101.1|	1.00E-13	PREDICTED: similar to CG2212-PA [Nasonia vitripennis]
BT_Q_SG_ZJU_Unigene1745	gi|53681197|gb|AAU89724.1|	3.00E-19	cytochrome b [Sus scrofa]
BT_Q_SG_ZJU_Unigene1746	gi|157366840|gb|ABV45411.1|	1.00E-13	COE2 [Bemisia tabaci]
BT_Q_SG_ZJU_Unigene1747	gi|301630254|ref|XP_002944237.1|	4.00E-14	PREDICTED: 30S ribosomal protein S19-like [Xenopus (Silurana) tropicalis]
BT_Q_SG_ZJU_Unigene1748	gi|170032393|ref|XP_001844066.1|	3.00E-18	DNA-directed RNA polymerase I 135 kDa polypeptide [Culex quinquefasciatus] >gi|167872352|gb|EDS35735.1| DNA-directed RNA polymerase I 135 kDa polypeptide [Culex quinquefasciatus]
BT_Q_SG_ZJU_Unigene1758	gi|221128023|ref|XP_002154919.1|	4.00E-09	PREDICTED: similar to DNA-directed RNA polymerase beta subunit [Hydra magnipapillata]
BT_Q_SG_ZJU_Unigene1760	gi|237842341|ref|XP_002370468.1|	4.00E-07	toprim domain-containing protein [Toxoplasma gondii ME49] >gi|211968132|gb|EEB03328.1| toprim domain-containing protein [Toxoplasma gondii ME49]
BT_Q_SG_ZJU_Unigene1761	gi|110749105|ref|XP_396869.3|	1.00E-11	PREDICTED: similar to Phosphotidylinositol 3 kinase 68D CG11621-PA, isoform A [Apis mellifera]
BT_Q_SG_ZJU_Unigene1765	gi|291235941|ref|XP_002737907.1|	4.00E-14	PREDICTED: WD repeats and SOF1 domain containing-like [Saccoglossus kowalevskii]
BT_Q_SG_ZJU_Unigene1768	gi|221126309|ref|XP_002165478.1|	4.00E-06	PREDICTED: similar to transketolase [Hydra magnipapillata]
BT_Q_SG_ZJU_Unigene1787	gi|297467809|ref|XP_002705336.1|	2.00E-11	PREDICTED: ferrous iron transport protein B-like, partial [Bos taurus]
BT_Q_SG_ZJU_Unigene1803	gi|195583199|ref|XP_002081411.1|	5.00E-18	GD10997 [Drosophila simulans] >gi|194193420|gb|EDX06996.1| GD10997 [Drosophila simulans]
BT_Q_SG_ZJU_Unigene1804	gi|221124504|ref|XP_002166550.1|	9.00E-07	PREDICTED: similar to aspartate aminotransferase [Hydra magnipapillata]
BT_Q_SG_ZJU_Unigene1823	gi|289740605|gb|ADD19050.1|	8.00E-16	UDP-glucose pyrophosphorylase [Glossina morsitans morsitans]
BT_Q_SG_ZJU_Unigene1826	gi|301630293|ref|XP_002944256.1|	9.00E-07	PREDICTED: tRNA uridine 5-carboxymethylaminomethyl modification enzyme mnmG-like [Xenopus (Silurana) tropicalis]
BT_Q_SG_ZJU_Unigene1829	gi|193669457|ref|XP_001949530.1|	5.00E-16	PREDICTED: similar to L(b002) protein, partial [Acyrthosiphon pisum]
BT_Q_SG_ZJU_Unigene1845	gi|110749888|ref|XP_394154.3|	4.00E-14	PREDICTED: similar to dystrophin CG31175-PA, isoform A [Apis mellifera]
BT_Q_SG_ZJU_Unigene1849	gi|156089385|ref|XP_001612099.1|	7.00E-09	s-adenosylmethionine synthetase [Babesia bovis T2Bo]
BT_Q_SG_ZJU_Unigene1869	gi|118093103|ref|XP_426543.2|	4.00E-19	PREDICTED: similar to Prdx3 protein [Gallus gallus]
BT_Q_SG_ZJU_Unigene1875	gi|91087583|ref|XP_971811.1|	1.00E-08	PREDICTED: similar to MGC79091 protein [Tribolium castaneum]
BT_Q_SG_ZJU_Unigene1878	gi|156555079|ref|XP_001604234.1|	6.00E-08	PREDICTED: similar to CG2852-PA [Nasonia vitripennis]
BT_Q_SG_ZJU_Unigene1886	gi|221124476|ref|XP_002165966.1|	6.00E-09	PREDICTED: similar to acetyl-Coenzyme A acyltransferase 1 [Hydra magnipapillata]
BT_Q_SG_ZJU_Unigene1890	gi|170043874|ref|XP_001849594.1|	6.00E-17	ubiquitin-activating enzyme E1 [Culex quinquefasciatus] >gi|167867157|gb|EDS30540.1| ubiquitin-activating enzyme E1 [Culex quinquefasciatus]
BT_Q_SG_ZJU_Unigene1892	gi|301632871|ref|XP_002945503.1|	9.00E-12	PREDICTED: 3-demethylubiquinone-9 3-methyltransferase-like [Xenopus (Silurana) tropicalis]
BT_Q_SG_ZJU_Unigene1893	gi|156552485|ref|XP_001602004.1|	1.00E-11	PREDICTED: similar to hCG1735290 [Nasonia vitripennis]
BT_Q_SG_ZJU_Unigene1897	gi|260824746|ref|XP_002607328.1|	3.00E-06	hypothetical protein BRAFLDRAFT_261238 [Branchiostoma floridae] >gi|229292675|gb|EEN63338.1| hypothetical protein BRAFLDRAFT_261238 [Branchiostoma floridae]
BT_Q_SG_ZJU_Unigene1899	gi|156552384|ref|XP_001602726.1|	5.00E-12	PREDICTED: similar to arsenite-resistance protein [Nasonia vitripennis]
BT_Q_SG_ZJU_Unigene1903	gi|239789330|dbj|BAH71295.1|	1.00E-07	ACYPI008057 [Acyrthosiphon pisum]
BT_Q_SG_ZJU_Unigene1910	gi|66803052|ref|XP_635369.1|	2.00E-11	glycogen phosphorylase 2 [Dictyostelium discoideum AX4] >gi|166208493|sp|P34114.2|PHS2_DICDI RecName: Full=Glycogen phosphorylase 2; Short=GP2 >gi|60463663|gb|EAL61845.1| glycogen phosphorylase 2 [Dictyostelium discoideum AX4]
BT_Q_SG_ZJU_Unigene1912	gi|290998083|ref|XP_002681610.1|	2.00E-06	predicted protein [Naegleria gruberi] >gi|284095235|gb|EFC48866.1| predicted protein [Naegleria gruberi]
BT_Q_SG_ZJU_Unigene1915	gi|195393500|ref|XP_002055392.1|	3.00E-15	GJ19344 [Drosophila virilis] >gi|194149902|gb|EDW65593.1| GJ19344 [Drosophila virilis]
BT_Q_SG_ZJU_Unigene1918	gi|193603774|ref|XP_001950066.1|	1.00E-07	PREDICTED: similar to 4A11 antigen; sperm tail membrane antigen [Acyrthosiphon pisum]
BT_Q_SG_ZJU_Unigene1924	gi|187123196|ref|NP_001119699.1|	3.00E-15	ribosomal protein S26 [Acyrthosiphon pisum] >gi|239799338|dbj|BAH70595.1| ACYPI000091 [Acyrthosiphon pisum]
BT_Q_SG_ZJU_Unigene1946	gi|221108850|ref|XP_002163737.1|	3.00E-08	PREDICTED: similar to 2-hydroxyacyl-CoA lyase 1 [Hydra magnipapillata] >gi|124360613|gb|ABN08612.1| Thiamine pyrophosphate enzyme, central region [Medicago truncatula]
BT_Q_SG_ZJU_Unigene1970	gi|170595572|ref|XP_001902435.1|	1.00E-10	RNA recognition motif. [Brugia malayi] >gi|158589895|gb|EDP28716.1| RNA recognition motif. [Brugia malayi]
BT_Q_SG_ZJU_Unigene1971	gi|301631549|ref|XP_002944860.1|	5.00E-10	PREDICTED: elongation factor G-like, partial [Xenopus (Silurana) tropicalis]
BT_Q_SG_ZJU_Unigene1972	gi|301630819|ref|XP_002944514.1|	1.00E-17	PREDICTED: chaperone protein clpB-like, partial [Xenopus (Silurana) tropicalis]
BT_Q_SG_ZJU_Unigene1980	gi|221487024|gb|EEE25270.1|	6.00E-06	4-hydroxybenzoate octaprenyltransferase, putative [Toxoplasma gondii GT1]
BT_Q_SG_ZJU_Unigene1985	gi|110770160|ref|XP_623772.2|	1.00E-07	PREDICTED: similar to PHD finger protein 7, partial [Apis mellifera]
BT_Q_SG_ZJU_Unigene1995	gi|158298976|ref|XP_319107.3|	6.00E-13	AGAP009971-PA [Anopheles gambiae str. PEST] >gi|157014146|gb|EAA13916.4| AGAP009971-PA [Anopheles gambiae str. PEST]
BT_Q_SG_ZJU_Unigene1997	gi|301632116|ref|XP_002945137.1|	1.00E-06	PREDICTED: bis(5'-nucleosyl)-tetraphosphatase, symmetrical-like [Xenopus (Silurana) tropicalis]
BT_Q_SG_ZJU_Unigene2003	gi|301630603|ref|XP_002944406.1|	1.00E-09	PREDICTED: c4-dicarboxylate transport transcriptional regulatory protein dctD-like [Xenopus (Silurana) tropicalis]
BT_Q_SG_ZJU_Unigene2007	gi|221124498|ref|XP_002166299.1|	1.00E-17	PREDICTED: hypothetical protein [Hydra magnipapillata]
BT_Q_SG_ZJU_Unigene2014	gi|195565075|ref|XP_002106131.1|	6.00E-14	GD16696 [Drosophila simulans] >gi|194203503|gb|EDX17079.1| GD16696 [Drosophila simulans]
BT_Q_SG_ZJU_Unigene2021	gi|156545507|ref|XP_001607070.1|	2.00E-13	PREDICTED: similar to epoxide hydrolase [Nasonia vitripennis]
BT_Q_SG_ZJU_Unigene2029	gi|301632155|ref|XP_002945156.1|	7.00E-12	PREDICTED: uvrABC system protein A-like, partial [Xenopus (Silurana) tropicalis]
BT_Q_SG_ZJU_Unigene2037	gi|170034336|ref|XP_001845030.1|	3.00E-18	isocitrate dehydrogenase [Culex quinquefasciatus] >gi|167875663|gb|EDS39046.1| isocitrate dehydrogenase [Culex quinquefasciatus]
BT_Q_SG_ZJU_Unigene2049	gi|239790508|dbj|BAH71811.1|	3.00E-22	ACYPI006367 [Acyrthosiphon pisum]
BT_Q_SG_ZJU_Unigene2053	gi|195445795|ref|XP_002070488.1|	3.00E-07	GK11008 [Drosophila willistoni] >gi|194166573|gb|EDW81474.1| GK11008 [Drosophila willistoni]
BT_Q_SG_ZJU_Unigene2058	gi|193697645|ref|XP_001945574.1|	1.00E-06	PREDICTED: hypothetical protein [Acyrthosiphon pisum]
BT_Q_SG_ZJU_Unigene2065	gi|114053253|ref|NP_001040525.1|	6.00E-19	6-phosphogluconate dehydrogenase [Bombyx mori] >gi|95102844|gb|ABF51363.1| 6-phosphogluconate dehydrogenase [Bombyx mori]
BT_Q_SG_ZJU_Unigene2070	gi|296219230|ref|XP_002755784.1|	4.00E-06	PREDICTED: RNA pseudouridylate synthase domain-containing protein 1-like [Callithrix jacchus]
BT_Q_SG_ZJU_Unigene2084	gi|134948671|ref|NP_001077096.1|	3.00E-21	small nuclear ribonucleoprotein sm d2 [Bombyx mori] >gi|117606770|gb|ABK42005.1| small nuclear ribonucleoprotein sm d2 [Bombyx mori]
BT_Q_SG_ZJU_Unigene2089	gi|158297024|ref|XP_317327.4|	2.00E-06	AGAP008133-PA [Anopheles gambiae str. PEST] >gi|157014996|gb|EAA12417.4| AGAP008133-PA [Anopheles gambiae str. PEST]
BT_Q_SG_ZJU_Unigene2100	gi|301630819|ref|XP_002944514.1|	6.00E-13	PREDICTED: chaperone protein clpB-like, partial [Xenopus (Silurana) tropicalis]
BT_Q_SG_ZJU_Unigene2107	gi|301632060|ref|XP_002945109.1|	1.00E-17	PREDICTED: formyltetrahydrofolate deformylase-like [Xenopus (Silurana) tropicalis]
BT_Q_SG_ZJU_Unigene2115	gi|119611832|gb|EAW91426.1|	3.00E-22	hCG2027326 [Homo sapiens]
BT_Q_SG_ZJU_Unigene2117	gi|156548334|ref|XP_001603220.1|	1.00E-09	PREDICTED: similar to thioredoxin reductase [Nasonia vitripennis]
BT_Q_SG_ZJU_Unigene2120	gi|91093365|ref|XP_969666.1|	3.00E-17	PREDICTED: similar to AGAP005102-PA [Tribolium castaneum]
BT_Q_SG_ZJU_Unigene2127	gi|301630430|ref|XP_002944324.1|	2.00E-07	PREDICTED: chemotaxis protein cheA-like [Xenopus (Silurana) tropicalis]
BT_Q_SG_ZJU_Unigene2130	gi|296221671|ref|XP_002756851.1|	5.00E-18	PREDICTED: elongator complex protein 3 isoform 2 [Callithrix jacchus]
BT_Q_SG_ZJU_Unigene2136	gi|193603774|ref|XP_001950066.1|	5.00E-15	PREDICTED: similar to 4A11 antigen; sperm tail membrane antigen [Acyrthosiphon pisum]
BT_Q_SG_ZJU_Unigene2140	gi|66553024|ref|XP_623333.1|	2.00E-20	PREDICTED: similar to splicing factor 3b, subunit 3 isoform 1 [Apis mellifera]
BT_Q_SG_ZJU_Unigene2156	gi|225718234|gb|ACO14963.1|	1.00E-10	Glucosamine-6-phosphate isomerase [Caligus clemensi]
BT_Q_SG_ZJU_Unigene2167	gi|291415306|ref|XP_002723895.1|	7.00E-15	PREDICTED: hypothetical protein [Oryctolagus cuniculus]
BT_Q_SG_ZJU_Unigene2170	gi|170036759|ref|XP_001846229.1|	1.00E-13	conserved oligomeric Golgi complex component 4 [Culex quinquefasciatus] >gi|167879672|gb|EDS43055.1| conserved oligomeric Golgi complex component 4 [Culex quinquefasciatus]
BT_Q_SG_ZJU_Unigene2176	gi|301629778|ref|XP_002944011.1|	9.00E-07	PREDICTED: probable potassium transport system protein kup-like [Xenopus (Silurana) tropicalis]
BT_Q_SG_ZJU_Unigene2178	gi|301629455|ref|XP_002943855.1|	7.00E-07	PREDICTED: hypothetical protein LOC100488488 [Xenopus (Silurana) tropicalis]
BT_Q_SG_ZJU_Unigene2179	gi|193645742|ref|XP_001950910.1|	8.00E-21	PREDICTED: similar to ClpB ATP protease, partial [Acyrthosiphon pisum]
BT_Q_SG_ZJU_Unigene2184	gi|110756658|ref|XP_001121257.1|	5.00E-16	PREDICTED: similar to CG7274-PA [Apis mellifera]
BT_Q_SG_ZJU_Unigene2185	gi|301631139|ref|XP_002944664.1|	6.00E-13	PREDICTED: acriflavine resistance protein B-like, partial [Xenopus (Silurana) tropicalis]
BT_Q_SG_ZJU_Unigene2201	gi|170585968|ref|XP_001897753.1|	2.00E-10	2-oxoglutarate dehydrogenase E1 component, mitochondrial precursor [Brugia malayi]
BT_Q_SG_ZJU_Unigene2206	gi|115924174|ref|XP_001188526.1|	6.00E-06	PREDICTED: similar to Chromosome 7 open reading frame 30 [Strongylocentrotus purpuratus] >gi|115953035|ref|XP_797268.2| PREDICTED: similar to Chromosome 7 open reading frame 30 [Strongylocentrotus purpuratus]
BT_Q_SG_ZJU_Unigene2216	gi|193641284|ref|XP_001950427.1|	7.00E-09	PREDICTED: similar to 5-nucleotidase precursor, partial [Acyrthosiphon pisum]
BT_Q_SG_ZJU_Unigene2225	gi|301629455|ref|XP_002943855.1|	5.00E-08	PREDICTED: hypothetical protein LOC100488488 [Xenopus (Silurana) tropicalis]
BT_Q_SG_ZJU_Unigene2234	gi|115629241|ref|XP_783517.2|	4.00E-08	PREDICTED: similar to MGC139179 protein [Strongylocentrotus purpuratus] >gi|115945892|ref|XP_001186832.1| PREDICTED: similar to MGC139179 protein [Strongylocentrotus purpuratus]
BT_Q_SG_ZJU_Unigene2241	gi|156537209|ref|XP_001604879.1|	5.00E-13	PREDICTED: similar to ubiquitin-activating enzyme E1 [Nasonia vitripennis]
BT_Q_SG_ZJU_Unigene2253	gi|229366050|gb|ACQ58005.1|	1.00E-14	Pterin-4-alpha-carbinolamine dehydratase [Anoplopoma fimbria] >gi|229367706|gb|ACQ58833.1| Pterin-4-alpha-carbinolamine dehydratase [Anoplopoma fimbria]
BT_Q_SG_ZJU_Unigene2256	gi|195444874|ref|XP_002070069.1|	5.00E-18	GK11224 [Drosophila willistoni] >gi|194166154|gb|EDW81055.1| GK11224 [Drosophila willistoni]
BT_Q_SG_ZJU_Unigene2280	gi|48102389|ref|XP_395346.1|	4.00E-22	PREDICTED: similar to CG17293-PA [Apis mellifera]
BT_Q_SG_ZJU_Unigene2282	gi|189234124|ref|XP_968871.2|	2.00E-12	PREDICTED: similar to protease m1 zinc metalloprotease [Tribolium castaneum]
BT_Q_SG_ZJU_Unigene2283	gi|294717985|gb|ADF31833.1|	8.00E-21	arginine kinase [Lysiphlebus testaceipes]
BT_Q_SG_ZJU_Unigene2297	gi|189234051|ref|XP_001809969.1|	7.00E-09	PREDICTED: similar to Na-K-Cl cotransporter [Tribolium castaneum]
BT_Q_SG_ZJU_Unigene2300	gi|193639981|ref|XP_001944525.1|	3.00E-14	PREDICTED: similar to npdc-1 [Acyrthosiphon pisum]
BT_Q_SG_ZJU_Unigene2313	gi|193676500|ref|XP_001943118.1|	2.00E-13	PREDICTED: similar to protective antigen 4D8 [Acyrthosiphon pisum]
BT_Q_SG_ZJU_Unigene2328	gi|193671791|ref|XP_001945682.1|	8.00E-11	PREDICTED: similar to programmed cell death 2-like [Acyrthosiphon pisum]
BT_Q_SG_ZJU_Unigene2332	gi|114319093|gb|ABI63548.1|	2.00E-20	receptor for activated protein kinase C-like [Blattella germanica]
BT_Q_SG_ZJU_Unigene2344	gi|91092056|ref|XP_970271.1|	3.00E-17	PREDICTED: similar to dihydropyrimidine dehydrogenase [Tribolium castaneum]
BT_Q_SG_ZJU_Unigene2350	gi|91080447|ref|XP_969254.1|	2.00E-14	PREDICTED: similar to peroxiredoxin-like protein [Tribolium castaneum]
BT_Q_SG_ZJU_Unigene2367	gi|48100966|ref|XP_392639.1|	4.00E-21	PREDICTED: similar to bellwether CG3612-PA isoform 1 [Apis mellifera]
BT_Q_SG_ZJU_Unigene2368	gi|67084097|gb|AAY66983.1|	2.00E-14	chromobox protein-like 3 [Ixodes scapularis]
BT_Q_SG_ZJU_Unigene2375	gi|110768797|ref|XP_001122801.1|	3.00E-11	PREDICTED: similar to Transcription initiation factor IIF alpha subunit (TFIIF-alpha) (Transcription factor 5 large chain) (TF5A) [Apis mellifera]
BT_Q_SG_ZJU_Unigene2377	gi|157110513|ref|XP_001651134.1|	3.00E-09	mitochondrial ATP synthase b chain [Aedes aegypti] >gi|108878666|gb|EAT42891.1| mitochondrial ATP synthase b chain [Aedes aegypti]
BT_Q_SG_ZJU_Unigene2396	gi|66521456|ref|XP_623684.1|	4.00E-17	PREDICTED: similar to COP9 signalosome complex subunit 4 (Signalosome subunit 4) (SGN4) (JAB1-containing signalosome subunit 4) [Apis mellifera]
BT_Q_SG_ZJU_Unigene2402	gi|221124492|ref|XP_002166227.1|	3.00E-09	PREDICTED: hypothetical protein [Hydra magnipapillata]
BT_Q_SG_ZJU_Unigene2408	gi|110758650|ref|XP_397104.3|	1.00E-06	PREDICTED: similar to myotubularin-related protein 3 isoform c [Apis mellifera]
BT_Q_SG_ZJU_Unigene2414	gi|156549589|ref|XP_001603127.1|	2.00E-06	PREDICTED: similar to ENSANGP00000016987 [Nasonia vitripennis]
BT_Q_SG_ZJU_Unigene2416	gi|241257348|ref|XP_002404552.1|	1.00E-06	SAM dependent methyltransferase, putative [Ixodes scapularis] >gi|215496661|gb|EEC06301.1| SAM dependent methyltransferase, putative [Ixodes scapularis]
BT_Q_SG_ZJU_Unigene2433	gi|193692980|ref|XP_001948796.1|	1.00E-13	PREDICTED: similar to AGAP008074-PA [Acyrthosiphon pisum]
BT_Q_SG_ZJU_Unigene2438	gi|91094213|ref|XP_973050.1|	4.00E-19	PREDICTED: similar to Syt7 CG2381-PB, partial [Tribolium castaneum]
BT_Q_SG_ZJU_Unigene2454	gi|52220953|ref|YP_086814.1|	9.00E-12	NADH dehydrogenase subunit 2 [Bemisia tabaci] >gi|51944948|gb|AAU14204.1| NADH dehydrogenase subunit II [Bemisia tabaci]
BT_Q_SG_ZJU_Unigene2466	gi|268581941|ref|XP_002645954.1|	2.00E-06	C. briggsae CBR-GAS-1 protein [Caenorhabditis briggsae] >gi|187033200|emb|CAP27436.1| C. briggsae CBR-GAS-1 protein [Caenorhabditis briggsae]
BT_Q_SG_ZJU_Unigene2470	gi|300117076|ref|NP_001177866.1|	4.00E-07	ubiquitin carboxyl-terminal hydrolase 7 [Nasonia vitripennis]
BT_Q_SG_ZJU_Unigene2475	gi|66516821|ref|XP_396989.2|	3.00E-13	PREDICTED: similar to WD and tetratricopeptide repeats 1 [Apis mellifera]
BT_Q_SG_ZJU_Unigene2479	gi|291239739|ref|XP_002739776.1|	4.00E-08	PREDICTED: Mitochondrial import receptor subunit TOM20 homolog [Saccoglossus kowalevskii]
BT_Q_SG_ZJU_Unigene2480	gi|268306420|gb|ACY95331.1|	9.00E-20	ribosomal protein L8 [Manduca sexta]
BT_Q_SG_ZJU_Unigene2481	gi|91082695|ref|XP_971685.1|	7.00E-09	PREDICTED: similar to AGAP007393-PB [Tribolium castaneum]
BT_Q_SG_ZJU_Unigene2488	gi|160947856|gb|ABX54737.1|	4.00E-15	elongation factor 1 beta' [Spodoptera exigua]
BT_Q_SG_ZJU_Unigene2491	gi|189235813|ref|XP_971989.2|	5.00E-07	PREDICTED: similar to oligopeptidase [Tribolium castaneum]
BT_Q_SG_ZJU_Unigene2492	gi|301630154|ref|XP_002944192.1|	1.00E-16	PREDICTED: dihydrodipicolinate reductase-like [Xenopus (Silurana) tropicalis]
BT_Q_SG_ZJU_Unigene2508	gi|221128031|ref|XP_002155059.1|	4.00E-19	PREDICTED: similar to Translation elongation factor, mitochondrial [Hydra magnipapillata]
BT_Q_SG_ZJU_Unigene2510	gi|158302238|ref|XP_001689365.1|	1.00E-11	AGAP001315-PD [Anopheles gambiae str. PEST] >gi|157012854|gb|EDO63270.1| AGAP001315-PD [Anopheles gambiae str. PEST]
BT_Q_SG_ZJU_Unigene2511	gi|115906312|ref|XP_001190830.1|	4.00E-13	PREDICTED: similar to ENSANGP00000011378, partial [Strongylocentrotus purpuratus] >gi|115968717|ref|XP_001191118.1| PREDICTED: similar to ENSANGP00000011378, partial [Strongylocentrotus purpuratus]
BT_Q_SG_ZJU_Unigene2516	gi|110761280|ref|XP_623891.2|	6.00E-17	PREDICTED: similar to CG6841-PA [Apis mellifera]
BT_Q_SG_ZJU_Unigene2534	gi|198474085|ref|XP_001356555.2|	4.00E-18	GA18884 [Drosophila pseudoobscura pseudoobscura] >gi|198138240|gb|EAL33619.2| GA18884 [Drosophila pseudoobscura pseudoobscura]
BT_Q_SG_ZJU_Unigene2538	gi|156554078|ref|XP_001600059.1|	5.00E-13	PREDICTED: similar to zinc metalloprotease [Nasonia vitripennis]
BT_Q_SG_ZJU_Unigene2543	gi|66521121|ref|XP_392952.2|	1.00E-18	PREDICTED: similar to CG10882-PA [Apis mellifera]
BT_Q_SG_ZJU_Unigene2544	gi|156547735|ref|XP_001605466.1|	4.00E-13	PREDICTED: similar to vacuolar ATP synthase subunit h [Nasonia vitripennis]
BT_Q_SG_ZJU_Unigene2550	gi|156546876|ref|XP_001606680.1|	8.00E-08	PREDICTED: similar to LOC447949 protein [Nasonia vitripennis]
BT_Q_SG_ZJU_Unigene2561	gi|301298305|gb|ADK66538.1|	4.00E-17	NADH dehydrogenase subunit 4 [Homo sapiens]
BT_Q_SG_ZJU_Unigene2568	gi|195449369|ref|XP_002072044.1|	2.00E-09	GK22636 [Drosophila willistoni] >gi|194168129|gb|EDW83030.1| GK22636 [Drosophila willistoni]
BT_Q_SG_ZJU_Unigene2573	gi|91081359|ref|XP_971395.1|	2.00E-13	PREDICTED: similar to CG7830 CG7830-PA [Tribolium castaneum]
BT_Q_SG_ZJU_Unigene2577	gi|193613354|ref|XP_001943445.1|	2.00E-16	PREDICTED: similar to AGAP008127-PA [Acyrthosiphon pisum]
BT_Q_SG_ZJU_Unigene2578	gi|156546942|ref|XP_001604670.1|	3.00E-16	PREDICTED: similar to ribosomal protein S21 [Nasonia vitripennis]
BT_Q_SG_ZJU_Unigene2582	gi|193711493|ref|XP_001951913.1|	1.00E-11	PREDICTED: similar to CG18317 CG18317-PA [Acyrthosiphon pisum]
BT_Q_SG_ZJU_Unigene2583	gi|301630365|ref|XP_002944292.1|	9.00E-10	PREDICTED: acetoacetate metabolism regulatory protein AtoC-like, partial [Xenopus (Silurana) tropicalis]
BT_Q_SG_ZJU_Unigene2584	gi|170050200|ref|XP_001859639.1|	8.00E-14	deoxyribonuclease I [Culex quinquefasciatus] >gi|167871722|gb|EDS35105.1| deoxyribonuclease I [Culex quinquefasciatus]
BT_Q_SG_ZJU_Unigene2585	gi|297270868|ref|XP_001108646.2|	1.00E-05	PREDICTED: protein AF-9 isoform 2 [Macaca mulatta]
BT_Q_SG_ZJU_Unigene2592	gi|193599026|ref|XP_001952236.1|	5.00E-19	PREDICTED: similar to AGAP011504-PA [Acyrthosiphon pisum]
BT_Q_SG_ZJU_Unigene2594	gi|45826256|gb|AAS77768.1|	4.00E-21	NADH dehydrogenase subunit 3 [Bemisia argentifolii]
BT_Q_SG_ZJU_Unigene2603	gi|91081659|ref|XP_969257.1|	5.00E-19	PREDICTED: similar to Bekka CG4539-PA [Tribolium castaneum]
BT_Q_SG_ZJU_Unigene2604	gi|156543314|ref|XP_001604842.1|	1.00E-10	PREDICTED: similar to CG33113-PD, isoform 3 [Nasonia vitripennis]
BT_Q_SG_ZJU_Unigene2605	gi|91085813|ref|XP_974738.1|	2.00E-11	PREDICTED: similar to AGAP010288-PA [Tribolium castaneum]
BT_Q_SG_ZJU_Unigene2610	gi|193683491|ref|XP_001952406.1|	6.00E-06	PREDICTED: similar to thioglucosidase [Acyrthosiphon pisum]
BT_Q_SG_ZJU_Unigene2612	gi|157131620|ref|XP_001662281.1|	6.00E-17	npdc-1 [Aedes aegypti] >gi|108871481|gb|EAT35706.1| npdc-1 [Aedes aegypti]
BT_Q_SG_ZJU_Unigene2615	gi|301630028|ref|XP_002944133.1|	2.00E-07	PREDICTED: 3-oxoacyl-[acyl-carrier-protein] reductase-like [Xenopus (Silurana) tropicalis]
BT_Q_SG_ZJU_Unigene2620	gi|221126273|ref|XP_002164412.1|	6.00E-09	PREDICTED: similar to phosphoenol pyruvate carboxykinase [Hydra magnipapillata]
BT_Q_SG_ZJU_Unigene2631	gi|189240801|ref|XP_968845.2|	2.00E-08	PREDICTED: similar to rac-gtp binding protein [Tribolium castaneum]
BT_Q_SG_ZJU_Unigene2633	gi|157124767|ref|XP_001660514.1|	2.00E-15	lipocalin-1 interacting membrane receptor (limr) [Aedes aegypti] >gi|108873885|gb|EAT38110.1| lipocalin-1 interacting membrane receptor (limr) [Aedes aegypti]
BT_Q_SG_ZJU_Unigene2635	gi|91094443|ref|XP_970156.1|	1.00E-14	PREDICTED: similar to cytochrome c oxidase subunit Va [Tribolium castaneum]
BT_Q_SG_ZJU_Unigene2647	gi|170053155|ref|XP_001862544.1|	2.00E-06	mitochondrial ribosomal protein, S30 [Culex quinquefasciatus] >gi|167873799|gb|EDS37182.1| mitochondrial ribosomal protein, S30 [Culex quinquefasciatus]
BT_Q_SG_ZJU_Unigene2649	gi|37703929|gb|AAR01286.1|	3.00E-22	elongation factor-2 [Ctenolepisma lineata]
BT_Q_SG_ZJU_Unigene2656	gi|242247181|ref|NP_001156347.1|	5.00E-12	ZM-domain protein [Acyrthosiphon pisum]
BT_Q_SG_ZJU_Unigene2661	gi|195427395|ref|XP_002061762.1|	5.00E-10	GK17173 [Drosophila willistoni] >gi|194157847|gb|EDW72748.1| GK17173 [Drosophila willistoni]
BT_Q_SG_ZJU_Unigene2662	gi|282721114|ref|NP_001164229.1|	4.00E-12	mitochondrial acyl carrier protein 1 isoform A [Tribolium castaneum] >gi|270012711|gb|EFA09159.1| mitochondrial acyl carrier protein 1 isoform B [Tribolium castaneum]
BT_Q_SG_ZJU_Unigene2686	gi|158287288|ref|XP_309349.3|	2.00E-18	AGAP011298-PA [Anopheles gambiae str. PEST] >gi|157019579|gb|EAA05156.3| AGAP011298-PA [Anopheles gambiae str. PEST]
BT_Q_SG_ZJU_Unigene2715	gi|66552353|ref|XP_625204.1|	2.00E-17	PREDICTED: similar to CCR4-NOT transcription complex subunit 2 (CCR4-associated factor 2) [Apis mellifera]
BT_Q_SG_ZJU_Unigene2742	gi|301631139|ref|XP_002944664.1|	1.00E-15	PREDICTED: acriflavine resistance protein B-like, partial [Xenopus (Silurana) tropicalis]
BT_Q_SG_ZJU_Unigene2758	gi|195455795|ref|XP_002074870.1|	1.00E-17	GK22917 [Drosophila willistoni] >gi|194170955|gb|EDW85856.1| GK22917 [Drosophila willistoni]
BT_Q_SG_ZJU_Unigene2780	gi|221124414|ref|XP_002164112.1|	2.00E-18	PREDICTED: similar to ADP-forming, carbamate-phosphorylating [Hydra magnipapillata]
BT_Q_SG_ZJU_Unigene2784	gi|66513815|ref|XP_396838.2|	2.00E-18	PREDICTED: similar to CG7359-PA [Apis mellifera]
BT_Q_SG_ZJU_Unigene2797	gi|195585753|ref|XP_002082643.1|	1.00E-15	GD25116 [Drosophila simulans] >gi|194194652|gb|EDX08228.1| GD25116 [Drosophila simulans]
BT_Q_SG_ZJU_Unigene2808	gi|193713655|ref|XP_001950406.1|	5.00E-08	PREDICTED: similar to AGAP007393-PB [Acyrthosiphon pisum]
BT_Q_SG_ZJU_Unigene2812	gi|301628933|ref|XP_002943603.1|	9.00E-15	PREDICTED: DNA-directed RNA polymerase subunit alpha-like [Xenopus (Silurana) tropicalis]
BT_Q_SG_ZJU_Unigene2815	gi|193659548|ref|XP_001944048.1|	6.00E-11	PREDICTED: similar to CG11964 CG11964-PA [Acyrthosiphon pisum]
BT_Q_SG_ZJU_Unigene2819	gi|56118382|ref|NP_001008140.1|	4.00E-07	transforming growth factor beta regulator 1 [Xenopus (Silurana) tropicalis] >gi|82181179|sp|Q66IH2.1|TBRG1_XENTR RecName: Full=Transforming growth factor beta regulator 1 >gi|51703997|gb|AAH81351.1| MGC89629 protein [Xenopus (Silurana) tropicalis] >gi|89273788|emb|CAJ81813.1| novel protein similar to transforming growth factor beta regulator 1 [Xenopus tropicalis]
BT_Q_SG_ZJU_Unigene2825	gi|91077040|ref|XP_967879.1|	3.00E-11	PREDICTED: similar to signal recognition particle [Tribolium castaneum]
BT_Q_SG_ZJU_Unigene2837	gi|156551521|ref|XP_001605534.1|	2.00E-17	PREDICTED: similar to eIF3-S9 [Nasonia vitripennis]
BT_Q_SG_ZJU_Unigene2842	gi|110766309|ref|XP_001121902.1|	2.00E-09	PREDICTED: similar to Tubulin-specific chaperone B (Tubulin folding cofactor B) (Cytoskeleton-associated protein 1) (Cytoskeleton-associated protein CKAPI) [Apis mellifera]
BT_Q_SG_ZJU_Unigene2845	gi|91094127|ref|XP_968492.1|	6.00E-14	PREDICTED: similar to GA20276-PA [Tribolium castaneum]
BT_Q_SG_ZJU_Unigene2848	gi|156543800|ref|XP_001606461.1|	3.00E-07	PREDICTED: similar to signal recognition particle [Nasonia vitripennis]
BT_Q_SG_ZJU_Unigene2849	gi|157106351|ref|XP_001649284.1|	3.00E-23	eukaryotic translation elongation factor [Aedes aegypti] >gi|157106353|ref|XP_001649285.1| eukaryotic translation elongation factor [Aedes aegypti] >gi|108879885|gb|EAT44110.1| eukaryotic translation elongation factor [Aedes aegypti] >gi|108879886|gb|EAT44111.1| eukaryotic translation elongation factor [Aedes aegypti]
BT_Q_SG_ZJU_Unigene2851	gi|301630498|ref|XP_002944354.1|	4.00E-10	PREDICTED: protein bugT-like [Xenopus (Silurana) tropicalis]
BT_Q_SG_ZJU_Unigene2877	gi|193662091|ref|XP_001947404.1|	5.00E-21	PREDICTED: similar to adenylyl cyclase-associated protein [Acyrthosiphon pisum]
BT_Q_SG_ZJU_Unigene2885	gi|115928235|ref|XP_798116.2|	3.00E-09	PREDICTED: similar to galactokinase 1 [Strongylocentrotus purpuratus] >gi|115965341|ref|XP_001187174.1| PREDICTED: similar to galactokinase 1 [Strongylocentrotus purpuratus]
BT_Q_SG_ZJU_Unigene2886	gi|262400969|gb|ACY66387.1|	5.00E-16	28 kDa heat- and acid-stable phosphoprotein [Scylla paramamosain]
BT_Q_SG_ZJU_Unigene2899	gi|189241344|ref|XP_969865.2|	5.00E-21	PREDICTED: similar to GTP binding protein [Tribolium castaneum]
BT_Q_SG_ZJU_Unigene2911	gi|45826256|gb|AAS77768.1|	3.00E-13	NADH dehydrogenase subunit 3 [Bemisia argentifolii]
BT_Q_SG_ZJU_Unigene2914	gi|89148035|gb|ABD62774.1|	1.00E-06	esterase [Chilo suppressalis]
BT_Q_SG_ZJU_Unigene2921	gi|157139367|ref|XP_001647573.1|	5.00E-10	potassium-transporting atpase b chain (potassium- translocating atpase b chain) [Aedes aegypti] >gi|108865793|gb|EAT32241.1| potassium-transporting atpase b chain (potassium- translocating atpase b chain) [Aedes aegypti]
BT_Q_SG_ZJU_Unigene2928	gi|289742121|gb|ADD19808.1|	2.00E-18	ribosomal protein S15Aa [Glossina morsitans morsitans]
BT_Q_SG_ZJU_Unigene2929	gi|193598825|ref|XP_001951294.1|	7.00E-15	PREDICTED: similar to serine protease [Acyrthosiphon pisum]
BT_Q_SG_ZJU_Unigene2932	gi|295393292|gb|ADG03466.1|	7.00E-23	heat shock protein 90 [Bemisia tabaci]
BT_Q_SG_ZJU_Unigene2935	gi|170044840|ref|XP_001850039.1|	1.00E-10	twinfilin [Culex quinquefasciatus] >gi|167867964|gb|EDS31347.1| twinfilin [Culex quinquefasciatus]
BT_Q_SG_ZJU_Unigene2961	gi|195355598|ref|XP_002044278.1|	1.00E-17	GM15061 [Drosophila sechellia] >gi|194129579|gb|EDW51622.1| GM15061 [Drosophila sechellia]
BT_Q_SG_ZJU_Unigene2964	gi|282847467|ref|NP_001164282.1|	2.00E-10	ATP synthase subunit epsilon, mitochondrial [Tribolium castaneum]
BT_Q_SG_ZJU_Unigene2968	gi|297698627|ref|XP_002826425.1|	3.00E-12	PREDICTED: 60S ribosomal protein L38-like [Pongo abelii]
BT_Q_SG_ZJU_Unigene2973	gi|253744168|gb|EET00411.1|	8.00E-08	Carbamate kinase [Giardia intestinalis ATCC 50581]
BT_Q_SG_ZJU_Unigene2974	gi|66563290|ref|XP_392814.2|	1.00E-21	PREDICTED: similar to T-complex protein 1 subunit gamma (TCP-1-gamma) (CCT-gamma) [Apis mellifera]
BT_Q_SG_ZJU_Unigene2976	gi|70909843|emb|CAJ17408.1|	1.00E-06	ribosomal protein L30e [Meladema coriacea]
BT_Q_SG_ZJU_Unigene2980	gi|195377946|ref|XP_002047748.1|	2.00E-06	GJ13606 [Drosophila virilis] >gi|194154906|gb|EDW70090.1| GJ13606 [Drosophila virilis]
BT_Q_SG_ZJU_Unigene2981	gi|189234762|ref|XP_001814757.1|	8.00E-19	PREDICTED: similar to glycoprotein 25l [Tribolium castaneum]
BT_Q_SG_ZJU_Unigene2997	gi|157108693|ref|XP_001650345.1|	1.00E-09	n-myristoyl transferase [Aedes aegypti] >gi|108879244|gb|EAT43469.1| n-myristoyl transferase [Aedes aegypti]
BT_Q_SG_ZJU_Unigene2999	gi|56684881|gb|AAW22542.1|	5.00E-14	myosin light chain [Gryllotalpa orientalis]
BT_Q_SG_ZJU_Unigene3022	gi|156544080|ref|XP_001605370.1|	1.00E-20	PREDICTED: similar to ubiquitin fusion degradaton protein [Nasonia vitripennis]
BT_Q_SG_ZJU_Unigene3024	gi|189238122|ref|XP_001814185.1|	6.00E-08	PREDICTED: similar to CG14670 CG14670-PA [Tribolium castaneum]
BT_Q_SG_ZJU_Unigene3025	gi|195382288|ref|XP_002049862.1|	3.00E-09	GJ20513 [Drosophila virilis] >gi|194144659|gb|EDW61055.1| GJ20513 [Drosophila virilis]
BT_Q_SG_ZJU_Unigene3028	gi|224064512|ref|XP_002194872.1|	4.00E-13	PREDICTED: kelch domain containing 4 [Taeniopygia guttata]
BT_Q_SG_ZJU_Unigene3036	gi|66530192|ref|XP_623217.1|	2.00E-19	PREDICTED: similar to Nucleosome assembly protein 1-like 1 (NAP-1-related protein) (hNRP) isoform 1 [Apis mellifera] >gi|66530195|ref|XP_623275.1| PREDICTED: similar to Nucleosome assembly protein 1-like 1 (NAP-1-related protein) (hNRP) isoform 2 [Apis mellifera]
BT_Q_SG_ZJU_Unigene3038	gi|156542799|ref|XP_001607402.1|	3.00E-17	PREDICTED: similar to profilin [Nasonia vitripennis]
BT_Q_SG_ZJU_Unigene3053	gi|70909937|emb|CAJ17455.1|	2.00E-19	ribosomal protein L44e [Georissus sp. APV-2005]
BT_Q_SG_ZJU_Unigene3066	gi|195453364|ref|XP_002073756.1|	1.00E-10	GK12971 [Drosophila willistoni] >gi|194169841|gb|EDW84742.1| GK12971 [Drosophila willistoni]
BT_Q_SG_ZJU_Unigene3096	gi|193582612|ref|XP_001944230.1|	3.00E-17	PREDICTED: similar to gonadotropin inducible transcription factor [Acyrthosiphon pisum]
BT_Q_SG_ZJU_Unigene3103	gi|301631595|ref|XP_002944883.1|	8.00E-09	PREDICTED: ATP-dependent Clp protease ATP-binding subunit clpX-like [Xenopus (Silurana) tropicalis]
BT_Q_SG_ZJU_Unigene3104	gi|15811692|gb|AAL09065.1|AF420308_1	4.00E-07	aquaporin [Pyrocoelia rufa]
BT_Q_SG_ZJU_Unigene3111	gi|195035205|ref|XP_001989068.1|	1.00E-06	GH10244 [Drosophila grimshawi] >gi|224488055|sp|B4JB43.1|EIF3I_DROGR RecName: Full=Eukaryotic translation initiation factor 3 subunit I; Short=eIF3i; AltName: Full=Eukaryotic translation initiation factor 3 subunit 2; AltName: Full=TRIP-1 homolog >gi|193905068|gb|EDW03935.1| GH10244 [Drosophila grimshawi]
BT_Q_SG_ZJU_Unigene3121	gi|156542588|ref|XP_001603979.1|	2.00E-17	PREDICTED: similar to GA20103-PA [Nasonia vitripennis]
BT_Q_SG_ZJU_Unigene3122	gi|193631923|ref|XP_001947137.1|	4.00E-06	PREDICTED: similar to subtilisin-related protease SPC3, partial [Acyrthosiphon pisum]
BT_Q_SG_ZJU_Unigene3127	gi|112180419|gb|AAH30230.2|	4.00E-07	Aminolevulinate, delta-, synthase 2 [Homo sapiens]
BT_Q_SG_ZJU_Unigene3133	gi|268557292|ref|XP_002636635.1|	7.00E-10	C. briggsae CBR-CPR-1 protein [Caenorhabditis briggsae] >gi|187021092|emb|CAP39674.1| C. briggsae CBR-CPR-1 protein [Caenorhabditis briggsae]
BT_Q_SG_ZJU_Unigene3141	gi|193603534|ref|XP_001947836.1|	3.00E-20	PREDICTED: similar to AGAP009953-PA [Acyrthosiphon pisum]
BT_Q_SG_ZJU_Unigene3143	gi|170037323|ref|XP_001846508.1|	1.00E-20	growth hormone-inducible transmembrane protein [Culex quinquefasciatus] >gi|167880417|gb|EDS43800.1| growth hormone-inducible transmembrane protein [Culex quinquefasciatus]
BT_Q_SG_ZJU_Unigene3145	gi|193697490|ref|XP_001945902.1|	5.00E-23	PREDICTED: similar to protein phosphatase 1, catalytic subunit, alpha [Acyrthosiphon pisum]
BT_Q_SG_ZJU_Unigene3150	gi|156555652|ref|XP_001603746.1|	1.00E-20	PREDICTED: similar to nucleolar KKE/D repeat protein; DmNOP56 [Nasonia vitripennis]
BT_Q_SG_ZJU_Unigene3155	gi|281204852|gb|EFA79047.1|	3.00E-06	predicted protein [Polysphondylium pallidum PN500]
BT_Q_SG_ZJU_Unigene3159	gi|110761217|ref|XP_392825.3|	1.00E-17	PREDICTED: similar to radish CG4346-PA [Apis mellifera]
BT_Q_SG_ZJU_Unigene3160	gi|66547270|ref|XP_396642.2|	1.00E-14	PREDICTED: similar to CG6073-PA [Apis mellifera]
BT_Q_SG_ZJU_Unigene3165	gi|221101398|ref|XP_002170159.1|	8.00E-16	PREDICTED: similar to GI13269, partial [Hydra magnipapillata]
BT_Q_SG_ZJU_Unigene3181	gi|170038845|ref|XP_001847258.1|	5.00E-08	vacuolar proton ATPase [Culex quinquefasciatus] >gi|167862449|gb|EDS25832.1| vacuolar proton ATPase [Culex quinquefasciatus]
BT_Q_SG_ZJU_Unigene3182	gi|189240007|ref|XP_966693.2|	3.00E-13	PREDICTED: similar to vacuolar ATP synthase subunit h isoform 1 [Tribolium castaneum]
BT_Q_SG_ZJU_Unigene3187	gi|89213828|gb|ABD64222.1|	3.00E-22	adenine nucleotide translocator [Myzus persicae]
BT_Q_SG_ZJU_Unigene3192	gi|193627339|ref|XP_001945836.1|	2.00E-11	PREDICTED: similar to AGAP009080-PA [Acyrthosiphon pisum]
BT_Q_SG_ZJU_Unigene3193	gi|239792347|dbj|BAH72527.1|	4.00E-20	ACYPI008615 [Acyrthosiphon pisum]
BT_Q_SG_ZJU_Unigene3205	gi|156542803|ref|XP_001607568.1|	1.00E-24	PREDICTED: similar to lysyl-tRNA synthetase [Nasonia vitripennis]
BT_Q_SG_ZJU_Unigene3208	gi|195112475|ref|XP_002000798.1|	1.00E-19	GI22326 [Drosophila mojavensis] >gi|193917392|gb|EDW16259.1| GI22326 [Drosophila mojavensis]
BT_Q_SG_ZJU_Unigene3211	gi|156553206|ref|XP_001599732.1|	8.00E-16	PREDICTED: similar to CG8983-PA [Nasonia vitripennis]
BT_Q_SG_ZJU_Unigene3222	gi|193586911|ref|XP_001950325.1|	7.00E-21	PREDICTED: similar to neurotransmitter gated ion channel [Acyrthosiphon pisum]
BT_Q_SG_ZJU_Unigene3223	gi|301630603|ref|XP_002944406.1|	1.00E-07	PREDICTED: c4-dicarboxylate transport transcriptional regulatory protein dctD-like [Xenopus (Silurana) tropicalis]
BT_Q_SG_ZJU_Unigene3229	gi|215259681|gb|ACJ64332.1|	6.00E-16	heat shock cognate 70 [Culex tarsalis]
BT_Q_SG_ZJU_Unigene3230	gi|195448202|ref|XP_002071554.1|	2.00E-22	GK25859 [Drosophila willistoni] >gi|194167639|gb|EDW82540.1| GK25859 [Drosophila willistoni]
BT_Q_SG_ZJU_Unigene3236	gi|61654726|gb|AAX48889.1|	4.00E-15	S13 [Suberites domuncula]
BT_Q_SG_ZJU_Unigene3242	gi|195473607|ref|XP_002089084.1|	4.00E-13	GE18922 [Drosophila yakuba] >gi|194175185|gb|EDW88796.1| GE18922 [Drosophila yakuba]
BT_Q_SG_ZJU_Unigene3251	gi|156548046|ref|XP_001605937.1|	1.00E-06	PREDICTED: hypothetical protein [Nasonia vitripennis]
BT_Q_SG_ZJU_Unigene3259	gi|239792997|dbj|BAH72768.1|	6.00E-09	ACYPI009921 [Acyrthosiphon pisum]
BT_Q_SG_ZJU_Unigene3266	gi|90654517|gb|ABD96038.1|	3.00E-16	protein phosphatase type 1 [Toxoplasma gondii]
BT_Q_SG_ZJU_Unigene3275	gi|218526890|gb|ACK86644.1|	5.00E-15	transmembrane 9 superfamily protein member 4 [Lysiosquillina maculata]
BT_Q_SG_ZJU_Unigene3283	gi|125828659|ref|XP_001336136.1|	6.00E-12	PREDICTED: histidine triad nucleotide binding protein 1 [Danio rerio] >gi|51980436|gb|AAH81526.1| Zgc:103764 [Danio rerio] >gi|197247278|gb|AAI64932.1| Zgc:103764 protein [Danio rerio]
BT_Q_SG_ZJU_Unigene3288	gi|156348444|ref|XP_001621851.1|	2.00E-08	hypothetical protein NEMVEDRAFT_v1g221504 [Nematostella vectensis] >gi|156208152|gb|EDO29751.1| predicted protein [Nematostella vectensis]
BT_Q_SG_ZJU_Unigene3291	gi|170053622|ref|XP_001862760.1|	2.00E-18	ribose-phosphate pyrophosphokinase 1,2 [Culex quinquefasciatus] >gi|170071192|ref|XP_001869837.1| ribose-phosphate pyrophosphokinase 1,2 [Culex quinquefasciatus] >gi|167867118|gb|EDS30501.1| ribose-phosphate pyrophosphokinase 1,2 [Culex quinquefasciatus] >gi|167874069|gb|EDS37452.1| ribose-phosphate pyrophosphokinase 1,2 [Culex quinquefasciatus]
BT_Q_SG_ZJU_Unigene3296	gi|48095871|ref|XP_394536.1|	7.00E-21	PREDICTED: similar to Cyclin K CG15218-PA, isoform A [Apis mellifera]
BT_Q_SG_ZJU_Unigene3298	gi|91087369|ref|XP_975635.1|	3.00E-25	PREDICTED: similar to translation elongation factor 2 [Tribolium castaneum]
BT_Q_SG_ZJU_Unigene3314	gi|219911525|emb|CAX11688.1|	2.00E-18	pelota protein [Nilaparvata lugens]
BT_Q_SG_ZJU_Unigene3328	gi|289629216|ref|NP_001166192.1|	7.00E-21	coatomer protein complex subunit alpha [Bombyx mori] >gi|284027820|gb|ADB66734.1| coatomer protein complex subunit alpha [Bombyx mori]
BT_Q_SG_ZJU_Unigene3334	gi|24642872|ref|NP_573250.1|	9.00E-18	CG6762 [Drosophila melanogaster] >gi|30316301|sp|Q9VX10.1|SRX_DROME RecName: Full=Putative sulfiredoxin >gi|7293396|gb|AAF48773.1| CG6762 [Drosophila melanogaster] >gi|68051709|gb|AAY85118.1| GH18251p [Drosophila melanogaster]
BT_Q_SG_ZJU_Unigene3341	gi|109074007|ref|XP_001090341.1|	9.00E-07	PREDICTED: WD repeat-containing protein 19 [Macaca mulatta]
BT_Q_SG_ZJU_Unigene3348	gi|194765326|ref|XP_001964778.1|	5.00E-14	GF22866 [Drosophila ananassae] >gi|190615050|gb|EDV30574.1| GF22866 [Drosophila ananassae]
BT_Q_SG_ZJU_Unigene3352	gi|122107253|sp|Q17Q06.1|EIF3C_AEDAE	1.00E-08	RecName: Full=Eukaryotic translation initiation factor 3 subunit C; Short=eIF3c; AltName: Full=Eukaryotic translation initiation factor 3 subunit 8
BT_Q_SG_ZJU_Unigene3361	gi|110750879|ref|XP_001121596.1|	7.00E-13	PREDICTED: similar to CG14184-PA [Apis mellifera]
BT_Q_SG_ZJU_Unigene3362	gi|239788155|dbj|BAH70769.1|	2.00E-19	ACYPI005630 [Acyrthosiphon pisum] >gi|239788157|dbj|BAH70770.1| ACYPI005630 [Acyrthosiphon pisum] >gi|239788159|dbj|BAH70771.1| ACYPI005630 [Acyrthosiphon pisum] >gi|239788161|dbj|BAH70772.1| ACYPI005630 [Acyrthosiphon pisum]
BT_Q_SG_ZJU_Unigene3365	gi|158292622|ref|XP_314012.3|	4.00E-10	AGAP005130-PA [Anopheles gambiae str. PEST] >gi|157017078|gb|EAA09455.3| AGAP005130-PA [Anopheles gambiae str. PEST]
BT_Q_SG_ZJU_Unigene3374	gi|170572309|ref|XP_001892060.1|	8.00E-06	wnt family protein [Brugia malayi] >gi|158602959|gb|EDP39128.1| wnt family protein [Brugia malayi]
BT_Q_SG_ZJU_Unigene3393	gi|118404092|ref|NP_001072199.1|	2.00E-13	galactokinase 1 [Xenopus (Silurana) tropicalis]
BT_Q_SG_ZJU_Unigene3406	gi|193609437|ref|XP_001952606.1|	5.00E-10	PREDICTED: similar to trehalase [Acyrthosiphon pisum]
BT_Q_SG_ZJU_Unigene3409	gi|229577287|ref|NP_001153340.1|	8.00E-11	alpha-glucosidase-like [Nasonia vitripennis]
BT_Q_SG_ZJU_Unigene3415	gi|148298726|ref|NP_001091755.1|	2.00E-22	ADP-ribosylation factor [Bombyx mori] >gi|87248075|gb|ABD36090.1| ADP-ribosylation factor [Bombyx mori]
BT_Q_SG_ZJU_Unigene3422	gi|48138658|ref|XP_396912.1|	7.00E-26	PREDICTED: similar to ariadne CG5659-PA, isoform A [Apis mellifera] >gi|66499600|ref|XP_623344.1| PREDICTED: similar to ariadne CG5659-PA, isoform A [Apis mellifera]
BT_Q_SG_ZJU_Unigene3432	gi|91083819|ref|XP_973530.1|	8.00E-11	PREDICTED: similar to hydroxyacyl-coenzyme A dehydrogenase [Tribolium castaneum]
BT_Q_SG_ZJU_Unigene3442	gi|196018038|ref|XP_002118717.1|	4.00E-14	hypothetical protein TRIADDRAFT_62734 [Trichoplax adhaerens] >gi|190578390|gb|EDV18796.1| hypothetical protein TRIADDRAFT_62734 [Trichoplax adhaerens]
BT_Q_SG_ZJU_Unigene3444	gi|195376239|ref|XP_002046904.1|	1.00E-08	GJ13143 [Drosophila virilis] >gi|194154062|gb|EDW69246.1| GJ13143 [Drosophila virilis]
BT_Q_SG_ZJU_Unigene3448	gi|66519549|ref|XP_393737.2|	3.00E-15	PREDICTED: similar to RUN domain containing 1 [Apis mellifera]
BT_Q_SG_ZJU_Unigene3453	gi|118394913|ref|XP_001029816.1|	2.00E-07	Peptide methionine sulfoxide reductase family protein [Tetrahymena thermophila] >gi|89284085|gb|EAR82152.1| Peptide methionine sulfoxide reductase family protein [Tetrahymena thermophila SB210]
BT_Q_SG_ZJU_Unigene3455	gi|73962174|ref|XP_849800.1|	2.00E-15	PREDICTED: similar to Glyceraldehyde-3-phosphate dehydrogenase, liver (GAPDH) [Canis familiaris]
BT_Q_SG_ZJU_Unigene3461	gi|148233066|ref|NP_001080545.1|	2.00E-15	60S ribosomal protein L4-A [Xenopus laevis] >gi|292495031|sp|P08429.2|RL4A_XENLA RecName: Full=60S ribosomal protein L4-A; AltName: Full=L1A >gi|27882641|gb|AAH43895.1| Rpl-4 protein [Xenopus laevis] >gi|77748123|gb|AAI06316.1| Rpl-4 protein [Xenopus laevis] >gi|224828|prf||1202260A ribosomal protein L1a
BT_Q_SG_ZJU_Unigene3466	gi|195375267|ref|XP_002046423.1|	3.00E-20	GJ12512 [Drosophila virilis] >gi|194153581|gb|EDW68765.1| GJ12512 [Drosophila virilis]
BT_Q_SG_ZJU_Unigene3473	gi|118363284|ref|XP_001014794.1|	1.00E-06	ATP-NAD kinase family protein [Tetrahymena thermophila] >gi|89296634|gb|EAR94622.1| ATP-NAD kinase family protein [Tetrahymena thermophila SB210]
BT_Q_SG_ZJU_Unigene3487	gi|56462228|gb|AAV91397.1|	2.00E-22	ribosomal protein 25 [Lonomia obliqua]
BT_Q_SG_ZJU_Unigene3489	gi|170037865|ref|XP_001846775.1|	5.00E-14	transport protein sec23 [Culex quinquefasciatus] >gi|167881217|gb|EDS44600.1| transport protein sec23 [Culex quinquefasciatus]
BT_Q_SG_ZJU_Unigene3491	gi|66516821|ref|XP_396989.2|	5.00E-15	PREDICTED: similar to WD and tetratricopeptide repeats 1 [Apis mellifera]
BT_Q_SG_ZJU_Unigene3492	gi|194687929|ref|XP_001257222.2|	1.00E-10	PREDICTED: 1-deoxyxylulose 5-phosphate synthase-like, partial [Bos taurus]
BT_Q_SG_ZJU_Unigene3496	gi|467292|gb|AAA17387.1|	4.00E-10	glutamine-asparagine rich protein [Dictyostelium discoideum]
BT_Q_SG_ZJU_Unigene3498	gi|294896294|ref|XP_002775485.1|	4.00E-07	glucose transport protein, putative [Perkinsus marinus ATCC 50983] >gi|239881708|gb|EER07301.1| glucose transport protein, putative [Perkinsus marinus ATCC 50983]
BT_Q_SG_ZJU_Unigene3508	gi|239792364|dbj|BAH72534.1|	3.00E-12	ACYPI002040 [Acyrthosiphon pisum]
BT_Q_SG_ZJU_Unigene3509	gi|91089781|ref|XP_967683.1|	4.00E-12	PREDICTED: similar to AGAP004985-PA [Tribolium castaneum] >gi|91094701|ref|XP_969519.1| PREDICTED: similar to AGAP004985-PA [Tribolium castaneum]
BT_Q_SG_ZJU_Unigene3510	gi|193627234|ref|XP_001952147.1|	8.00E-14	PREDICTED: similar to NAD-dependent methanol dehydrogenase [Acyrthosiphon pisum]
BT_Q_SG_ZJU_Unigene3514	gi|110764956|ref|XP_395540.3|	2.00E-13	PREDICTED: similar to Probable cation-transporting ATPase 13A3 (ATPase family homolog up-regulated in senescence cells 1) [Apis mellifera]
BT_Q_SG_ZJU_Unigene3526	gi|242013215|ref|XP_002427310.1|	6.00E-12	Bromodomain-containing protein, putative [Pediculus humanus corporis] >gi|212511651|gb|EEB14572.1| Bromodomain-containing protein, putative [Pediculus humanus corporis]
BT_Q_SG_ZJU_Unigene3538	gi|193669389|ref|XP_001951091.1|	4.00E-25	PREDICTED: similar to pre-mrna splicing factor [Acyrthosiphon pisum]
BT_Q_SG_ZJU_Unigene3541	gi|170043665|ref|XP_001849498.1|	2.00E-18	RNA and export factor binding protein [Culex quinquefasciatus] >gi|167867015|gb|EDS30398.1| RNA and export factor binding protein [Culex quinquefasciatus]
BT_Q_SG_ZJU_Unigene3550	gi|195585815|ref|XP_002082674.1|	4.00E-23	GD11704 [Drosophila simulans] >gi|194194683|gb|EDX08259.1| GD11704 [Drosophila simulans]
BT_Q_SG_ZJU_Unigene3554	gi|91093216|ref|XP_966931.1|	1.00E-25	PREDICTED: similar to pre-mrna splicing factor prp8 [Tribolium castaneum]
BT_Q_SG_ZJU_Unigene3559	gi|66514532|ref|XP_624335.1|	9.00E-18	PREDICTED: similar to G protein -subunit 76C CG8770-PA [Apis mellifera]
BT_Q_SG_ZJU_Unigene3566	gi|118794370|ref|XP_321441.3|	2.00E-13	AGAP001654-PA [Anopheles gambiae str. PEST] >gi|160358749|sp|Q7PXY4.3|SAP30_ANOGA RecName: Full=Histone deacetylase complex subunit SAP30 homolog >gi|116116264|gb|EAA00919.3| AGAP001654-PA [Anopheles gambiae str. PEST]
BT_Q_SG_ZJU_Unigene3569	gi|66523748|ref|XP_624861.1|	9.00E-13	PREDICTED: similar to N-myristoyltransferase 1 [Apis mellifera]
BT_Q_SG_ZJU_Unigene3576	gi|193582540|ref|XP_001946425.1|	9.00E-18	PREDICTED: similar to programmed cell death [Acyrthosiphon pisum]
BT_Q_SG_ZJU_Unigene3585	gi|156538447|ref|XP_001606398.1|	2.00E-13	PREDICTED: similar to hCG22358 [Nasonia vitripennis]
BT_Q_SG_ZJU_Unigene3586	gi|66547675|ref|XP_623833.1|	8.00E-08	PREDICTED: similar to CG13397-PA [Apis mellifera]
BT_Q_SG_ZJU_Unigene3591	gi|166952267|gb|ABZ04216.1|	1.00E-19	ribosomal protein rpl3 [Lineus viridis]
BT_Q_SG_ZJU_Unigene3594	gi|217426000|gb|ACK44331.1|	5.00E-21	mitochondrial ATP synthase subunit alpha [Drosophila silvestris]
BT_Q_SG_ZJU_Unigene3607	gi|156550634|ref|XP_001604682.1|	3.00E-07	PREDICTED: similar to CG9143-PA [Nasonia vitripennis]
BT_Q_SG_ZJU_Unigene3624	gi|193699903|ref|XP_001950973.1|	7.00E-12	PREDICTED: similar to zinc finger protein 294 [Acyrthosiphon pisum]
BT_Q_SG_ZJU_Unigene3628	gi|29169172|gb|AAO66461.1|	2.00E-09	pG1 protein [Homo sapiens]
BT_Q_SG_ZJU_Unigene3630	gi|91078856|ref|XP_972007.1|	6.00E-09	PREDICTED: similar to ribosomal protein L36e [Tribolium castaneum]
BT_Q_SG_ZJU_Unigene3632	gi|110776401|ref|XP_001122601.1|	2.00E-15	PREDICTED: hypothetical protein, partial [Apis mellifera]
BT_Q_SG_ZJU_Unigene3636	gi|193657401|ref|XP_001950833.1|	2.00E-09	PREDICTED: similar to LOC495980 protein [Acyrthosiphon pisum]
BT_Q_SG_ZJU_Unigene3638	gi|291223306|ref|XP_002731646.1|	1.00E-08	PREDICTED: THO complex 4-like [Saccoglossus kowalevskii]
BT_Q_SG_ZJU_Unigene3640	gi|291240847|ref|XP_002740329.1|	1.00E-12	PREDICTED: ADP-ribosylation factor GTPase activating protein 2-like [Saccoglossus kowalevskii]
BT_Q_SG_ZJU_Unigene3646	gi|156551219|ref|XP_001602185.1|	4.00E-13	PREDICTED: similar to ribosomal protein S27a [Nasonia vitripennis]
BT_Q_SG_ZJU_Unigene3664	gi|195433098|ref|XP_002064552.1|	4.00E-08	GK23910 [Drosophila willistoni] >gi|194160637|gb|EDW75538.1| GK23910 [Drosophila willistoni]
BT_Q_SG_ZJU_Unigene3666	gi|195149385|ref|XP_002015638.1|	2.00E-16	GL10916 [Drosophila persimilis] >gi|198456162|ref|XP_001360237.2| GA17643 [Drosophila pseudoobscura pseudoobscura] >gi|221222437|sp|Q292Q0.2|ATC1_DROPS RecName: Full=Calcium-transporting ATPase sarcoplasmic/endoplasmic reticulum type; AltName: Full=Calcium pump >gi|194109485|gb|EDW31528.1| GL10916 [Drosophila persimilis] >gi|198135518|gb|EAL24811.2| GA17643 [Drosophila pseudoobscura pseudoobscura]
BT_Q_SG_ZJU_Unigene3668	gi|212549686|ref|NP_001131134.1|	4.00E-09	neuroendocrine convertase 1 [Danio rerio] >gi|209981345|gb|ACJ05352.1| prohormone convertase 1 [Danio rerio]
BT_Q_SG_ZJU_Unigene3675	gi|189240931|ref|XP_001810068.1|	3.00E-17	PREDICTED: similar to NADH dehydrogenase 1 alpha subcomplex subunit 5 [Tribolium castaneum]
BT_Q_SG_ZJU_Unigene3683	gi|66548257|ref|XP_393409.2|	4.00E-11	PREDICTED: similar to Cullin-associated NEDD8-dissociated protein 1 (Cullin-associated and neddylation-dissociated protein 1) (p120 CAND1) isoform 1 [Apis mellifera]
BT_Q_SG_ZJU_Unigene3689	gi|156538745|ref|XP_001607870.1|	1.00E-06	PREDICTED: similar to tankyrase [Nasonia vitripennis]
BT_Q_SG_ZJU_Unigene3704	gi|301298305|gb|ADK66538.1|	6.00E-22	NADH dehydrogenase subunit 4 [Homo sapiens]
BT_Q_SG_ZJU_Unigene3705	gi|221128021|ref|XP_002154898.1|	2.00E-13	PREDICTED: similar to DNA-directed RNA polymerase beta chain [Hydra magnipapillata]
BT_Q_SG_ZJU_Unigene3709	gi|283135218|ref|NP_001164364.1|	5.00E-11	fumarylacetoacetase [Nasonia vitripennis]
BT_Q_SG_ZJU_Unigene3712	gi|198453330|ref|XP_001359153.2|	3.00E-24	GA19329 [Drosophila pseudoobscura pseudoobscura] >gi|198132313|gb|EAL28297.2| GA19329 [Drosophila pseudoobscura pseudoobscura]
BT_Q_SG_ZJU_Unigene3725	gi|156538611|ref|XP_001607571.1|	2.00E-07	PREDICTED: similar to Amyloid beta precursor protein binding protein 1 [Nasonia vitripennis]
BT_Q_SG_ZJU_Unigene3726	gi|66509962|ref|XP_396921.2|	1.00E-10	PREDICTED: similar to CG5986-PA [Apis mellifera]
BT_Q_SG_ZJU_Unigene3727	gi|91090806|ref|XP_970749.1|	7.00E-13	PREDICTED: similar to ubiquitin-protein ligase [Tribolium castaneum]
BT_Q_SG_ZJU_Unigene3732	gi|71404075|ref|XP_804776.1|	2.00E-10	asparagine synthetase A [Trypanosoma cruzi strain CL Brener] >gi|71424438|ref|XP_812804.1| asparagine synthetase A [Trypanosoma cruzi strain CL Brener]
BT_Q_SG_ZJU_Unigene3737	gi|290981496|ref|XP_002673466.1|	3.00E-15	glutamine amidotransferase [Naegleria gruberi] >gi|284087050|gb|EFC40722.1| glutamine amidotransferase [Naegleria gruberi]
BT_Q_SG_ZJU_Unigene3738	gi|242003562|ref|XP_002422774.1|	8.00E-08	lysosomal-associated transmembrane protein, putative [Pediculus humanus corporis] >gi|212505632|gb|EEB10036.1| lysosomal-associated transmembrane protein, putative [Pediculus humanus corporis]
BT_Q_SG_ZJU_Unigene3754	gi|156550891|ref|XP_001602432.1|	4.00E-06	PREDICTED: similar to GA12584-PA [Nasonia vitripennis]
BT_Q_SG_ZJU_Unigene3756	gi|241563457|ref|XP_002401712.1|	1.00E-06	conserved hypothetical protein [Ixodes scapularis] >gi|215501904|gb|EEC11398.1| conserved hypothetical protein [Ixodes scapularis]
BT_Q_SG_ZJU_Unigene3760	gi|301631003|ref|XP_002944602.1|	4.00E-15	PREDICTED: 3-dehydroquinate synthase-like [Xenopus (Silurana) tropicalis]
BT_Q_SG_ZJU_Unigene3769	gi|293340501|ref|XP_002724689.1|	6.00E-06	PREDICTED: hypothetical protein [Rattus norvegicus]
BT_Q_SG_ZJU_Unigene3772	gi|297278556|ref|XP_002808261.1|	1.00E-16	PREDICTED: LOW QUALITY PROTEIN: uroporphyrinogen decarboxylase-like [Macaca mulatta]
BT_Q_SG_ZJU_Unigene3773	gi|91082265|ref|XP_973328.1|	3.00E-21	PREDICTED: similar to CG4495 CG4495-PB [Tribolium castaneum]
BT_Q_SG_ZJU_Unigene3780	gi|297284295|ref|XP_001098709.2|	8.00E-09	PREDICTED: group XV phospholipase A2 isoform 5 [Macaca mulatta]
BT_Q_SG_ZJU_Unigene3786	gi|83405744|gb|AAI11291.1|	2.00E-08	ADH1C protein [Bos taurus]
BT_Q_SG_ZJU_Unigene3789	gi|195038901|ref|XP_001990831.1|	2.00E-15	GH19579 [Drosophila grimshawi] >gi|193895027|gb|EDV93893.1| GH19579 [Drosophila grimshawi]
BT_Q_SG_ZJU_Unigene3795	gi|195436541|ref|XP_002066226.1|	2.00E-08	GK22248 [Drosophila willistoni] >gi|194162311|gb|EDW77212.1| GK22248 [Drosophila willistoni]
BT_Q_SG_ZJU_Unigene3803	gi|157136051|ref|XP_001656746.1|	1.00E-11	signal recognition particle [Aedes aegypti] >gi|108881114|gb|EAT45339.1| signal recognition particle [Aedes aegypti]
BT_Q_SG_ZJU_Unigene3810	gi|71662415|ref|XP_818215.1|	2.00E-09	UDP-galactose 4-epimerase [Trypanosoma cruzi strain CL Brener] >gi|70883452|gb|EAN96364.1| UDP-galactose 4-epimerase [Trypanosoma cruzi]
BT_Q_SG_ZJU_Unigene3819	gi|118781950|ref|XP_311967.3|	5.00E-14	AGAP002935-PA [Anopheles gambiae str. PEST] >gi|224488077|sp|Q7QD36.3|EIF3F_ANOGA RecName: Full=Eukaryotic translation initiation factor 3 subunit F; Short=eIF3f; AltName: Full=Eukaryotic translation initiation factor 3 subunit 5 >gi|116129338|gb|EAA07604.3| AGAP002935-PA [Anopheles gambiae str. PEST]
BT_Q_SG_ZJU_Unigene3822	gi|91085787|ref|XP_974503.1|	1.00E-13	PREDICTED: similar to thioredoxin-like protein [Tribolium castaneum]
BT_Q_SG_ZJU_Unigene3827	gi|110758611|ref|XP_001120393.1|	4.00E-19	PREDICTED: similar to YL-1 CG4621-PA [Apis mellifera]
BT_Q_SG_ZJU_Unigene3854	gi|189235094|ref|XP_969176.2|	3.00E-17	PREDICTED: similar to CG32699 CG32699-PB [Tribolium castaneum]
BT_Q_SG_ZJU_Unigene3866	gi|296213061|ref|XP_002753112.1|	8.00E-08	PREDICTED: serine/arginine repetitive matrix protein 4-like [Callithrix jacchus]
BT_Q_SG_ZJU_Unigene3875	gi|213032425|emb|CAS05791.1|	4.00E-19	60S acidic ribosomal protein P0 [Blaptica dubia]
BT_Q_SG_ZJU_Unigene3899	gi|156551445|ref|XP_001605926.1|	9.00E-18	PREDICTED: similar to translocon-associated protein gamma [Nasonia vitripennis]
BT_Q_SG_ZJU_Unigene3904	gi|157130319|ref|XP_001655659.1|	8.00E-14	mrna capping enzyme [Aedes aegypti] >gi|108871911|gb|EAT36136.1| mrna capping enzyme [Aedes aegypti]
BT_Q_SG_ZJU_Unigene3927	gi|170594285|ref|XP_001901894.1|	1.00E-20	NADH-ubiquinone oxidoreductase 75 kDa subunit, mitochondrial precursor [Brugia malayi]
BT_Q_SG_ZJU_Unigene3929	gi|70909667|emb|CAJ17256.1|	6.00E-24	ribosomal protein L10Ae [Biphyllus lunatus]
BT_Q_SG_ZJU_Unigene3937	gi|242022075|ref|XP_002431467.1|	4.00E-20	succinate dehydrogenase, flavoprotein subunit [Pediculus humanus corporis] >gi|212516755|gb|EEB18729.1| succinate dehydrogenase, flavoprotein subunit [Pediculus humanus corporis]
BT_Q_SG_ZJU_Unigene3941	gi|193617984|ref|XP_001944852.1|	2.00E-09	PREDICTED: similar to Argonaute-2b [Acyrthosiphon pisum]
BT_Q_SG_ZJU_Unigene3943	gi|134303247|gb|ABO70952.1|	4.00E-23	NADH dehydrogenase subunit 3 [Homo sapiens]
BT_Q_SG_ZJU_Unigene3947	gi|110749389|ref|XP_397439.3|	2.00E-12	PREDICTED: similar to eIF3-S10 CG9805-PA [Apis mellifera]
BT_Q_SG_ZJU_Unigene3948	gi|301631545|ref|XP_002944858.1|	2.00E-17	PREDICTED: 30S ribosomal protein S12-like [Xenopus (Silurana) tropicalis]
BT_Q_SG_ZJU_Unigene3949	gi|170044218|ref|XP_001849752.1|	3.00E-22	dynein heavy chain [Culex quinquefasciatus] >gi|167867449|gb|EDS30832.1| dynein heavy chain [Culex quinquefasciatus]
BT_Q_SG_ZJU_Unigene3959	gi|91084587|ref|XP_974100.1|	1.00E-12	PREDICTED: similar to AGAP004049-PA [Tribolium castaneum]
BT_Q_SG_ZJU_Unigene3962	gi|194745510|ref|XP_001955231.1|	6.00E-09	GF18656 [Drosophila ananassae] >gi|190628268|gb|EDV43792.1| GF18656 [Drosophila ananassae]
BT_Q_SG_ZJU_Unigene3963	gi|289740405|gb|ADD18950.1|	1.00E-20	inorganic pyrophosphatase/nucleosome remodeling factor subunit NURF38 [Glossina morsitans morsitans]
BT_Q_SG_ZJU_Unigene3985	gi|110755373|ref|XP_396540.3|	9.00E-18	PREDICTED: similar to spinster CG8428-PD, isoform D isoform 1 [Apis mellifera]
BT_Q_SG_ZJU_Unigene4003	gi|118783118|ref|XP_312776.3|	3.00E-25	AGAP003089-PA [Anopheles gambiae str. PEST] >gi|116129059|gb|EAA08469.4| AGAP003089-PA [Anopheles gambiae str. PEST]
BT_Q_SG_ZJU_Unigene4015	gi|301629268|ref|XP_002943766.1|	3.00E-06	PREDICTED: a-type flagellin-like [Xenopus (Silurana) tropicalis]
BT_Q_SG_ZJU_Unigene4025	gi|157127164|ref|XP_001661064.1|	9.00E-20	translation elongation factor g [Aedes aegypti] >gi|122117047|sp|Q16S14.1|EFGM_AEDAE RecName: Full=Elongation factor G, mitochondrial; Short=EF-Gmt; AltName: Full=Elongation factor G 1, mitochondrial; Short=mEF-G 1; AltName: Full=Elongation factor G1; Flags: Precursor >gi|108873029|gb|EAT37254.1| translation elongation factor g [Aedes aegypti]
BT_Q_SG_ZJU_Unigene4028	gi|116833117|gb|ABK29471.1|	6.00E-09	CHK1 checkpoint-like protein [Helicoverpa armigera]
BT_Q_SG_ZJU_Unigene4033	gi|72009127|ref|XP_784614.1|	2.00E-16	PREDICTED: similar to Vac14 homolog (S. cerevisiae) [Strongylocentrotus purpuratus] >gi|115946315|ref|XP_001181269.1| PREDICTED: similar to Vac14 homolog (S. cerevisiae) [Strongylocentrotus purpuratus]
BT_Q_SG_ZJU_Unigene4036	gi|193676215|ref|XP_001942529.1|	2.00E-08	PREDICTED: similar to mitochondrial ribosomal protein L30 CG7038-PA [Acyrthosiphon pisum]
BT_Q_SG_ZJU_Unigene4043	gi|153792609|ref|NP_001093277.1|	3.00E-07	tropomyosin-2 isoform 4 [Bombyx mori] >gi|95103006|gb|ABF51444.1| tropomyosin isoform 4 [Bombyx mori]
BT_Q_SG_ZJU_Unigene4048	gi|221059211|ref|XP_002260251.1|	7.00E-12	valine-tRNA ligase [Plasmodium knowlesi strain H]
BT_Q_SG_ZJU_Unigene4051	gi|291412313|ref|XP_002722423.1|	3.00E-09	PREDICTED: ribosomal protein P1-like [Oryctolagus cuniculus]
BT_Q_SG_ZJU_Unigene4061	gi|225711062|gb|ACO11377.1|	3.00E-23	NFU1 iron-sulfur cluster scaffold homolog [Caligus rogercresseyi]
BT_Q_SG_ZJU_Unigene4062	gi|110776820|ref|XP_624980.2|	2.00E-09	PREDICTED: similar to KDEL (Lys-Asp-Glu-Leu) containing 1 [Apis mellifera]
BT_Q_SG_ZJU_Unigene4064	gi|193573527|ref|XP_001946019.1|	3.00E-09	PREDICTED: similar to oligopeptide transporter [Acyrthosiphon pisum]
BT_Q_SG_ZJU_Unigene4066	gi|66533169|ref|XP_395809.2|	1.00E-21	PREDICTED: similar to Mediator complex subunit 19 CG5546-PA [Apis mellifera]
BT_Q_SG_ZJU_Unigene4074	gi|157110229|ref|XP_001651011.1|	1.00E-06	anterior fat body protein [Aedes aegypti] >gi|108883962|gb|EAT48187.1| anterior fat body protein [Aedes aegypti]
BT_Q_SG_ZJU_Unigene4075	gi|239948212|ref|ZP_04699965.1|	2.00E-17	GTP-binding protein YchF [Rickettsia endosymbiont of Ixodes scapularis] >gi|239922488|gb|EER22512.1| GTP-binding protein YchF [Rickettsia endosymbiont of Ixodes scapularis]
BT_Q_SG_ZJU_Unigene4081	gi|189237685|ref|XP_969117.2|	1.00E-26	PREDICTED: similar to proteasome beta-subunit [Tribolium castaneum]
BT_Q_SG_ZJU_Unigene4082	gi|91083817|ref|XP_973463.1|	2.00E-11	PREDICTED: similar to cationic amino acid transporter [Tribolium castaneum]
BT_Q_SG_ZJU_Unigene4098	gi|66548257|ref|XP_393409.2|	2.00E-20	PREDICTED: similar to Cullin-associated NEDD8-dissociated protein 1 (Cullin-associated and neddylation-dissociated protein 1) (p120 CAND1) isoform 1 [Apis mellifera]
BT_Q_SG_ZJU_Unigene4114	gi|289743105|gb|ADD20300.1|	3.00E-25	heat shock protein cognate 3 [Glossina morsitans morsitans]
BT_Q_SG_ZJU_Unigene4118	gi|91089959|ref|XP_973580.1|	1.00E-22	PREDICTED: similar to nicotinamide mononucleotide adenylyltransferase 1 [Tribolium castaneum]
BT_Q_SG_ZJU_Unigene4120	gi|156548336|ref|XP_001603267.1|	2.00E-14	PREDICTED: similar to CG10964-PA [Nasonia vitripennis]
BT_Q_SG_ZJU_Unigene4127	gi|45826255|gb|AAS77767.1|	6.00E-12	NADH dehydrogenase subunit 1 [Bemisia argentifolii]
BT_Q_SG_ZJU_Unigene4130	gi|259016158|sp|Q17RH7.2|TPRXL_HUMAN	2.00E-06	RecName: Full=Putative protein TPRXL
BT_Q_SG_ZJU_Unigene4132	gi|209151440|gb|ACI33076.1|	2.00E-25	ATP synthase subunit alpha, mitochondrial precursor [Salmo salar] >gi|223648354|gb|ACN10935.1| ATP synthase subunit alpha, mitochondrial precursor [Salmo salar]
BT_Q_SG_ZJU_Unigene4146	gi|66508439|ref|XP_392691.2|	3.00E-26	PREDICTED: similar to Elongation factor 2 (EF-2) isoform 1 [Apis mellifera]
BT_Q_SG_ZJU_Unigene4151	gi|72139805|ref|XP_791124.1|	1.00E-13	PREDICTED: similar to Ras homolog gene family, member T1 [Strongylocentrotus purpuratus] >gi|115949561|ref|XP_001179278.1| PREDICTED: similar to Ras homolog gene family, member T1 [Strongylocentrotus purpuratus]
BT_Q_SG_ZJU_Unigene4159	gi|48097418|ref|XP_393779.1|	9.00E-10	PREDICTED: similar to CG1968-PA, isoform A [Apis mellifera]
BT_Q_SG_ZJU_Unigene4165	gi|193610539|ref|XP_001949649.1|	2.00E-25	PREDICTED: similar to AGAP000195-PA [Acyrthosiphon pisum]
BT_Q_SG_ZJU_Unigene4167	gi|195577494|ref|XP_002078605.1|	2.00E-08	GD23513 [Drosophila simulans] >gi|194190614|gb|EDX04190.1| GD23513 [Drosophila simulans]
BT_Q_SG_ZJU_Unigene4179	gi|221117906|ref|XP_002160162.1|	2.00E-10	PREDICTED: similar to expressed protein, partial [Hydra magnipapillata]
BT_Q_SG_ZJU_Unigene4184	gi|156555574|ref|XP_001604950.1|	2.00E-11	PREDICTED: similar to ENSANGP00000019247 [Nasonia vitripennis]
BT_Q_SG_ZJU_Unigene4188	gi|118785000|ref|XP_314243.3|	2.00E-23	AGAP003344-PA [Anopheles gambiae str. PEST] >gi|116128145|gb|EAA09663.3| AGAP003344-PA [Anopheles gambiae str. PEST]
BT_Q_SG_ZJU_Unigene4200	gi|156543927|ref|XP_001607193.1|	9.00E-15	PREDICTED: similar to UDP-galactose transporter [Nasonia vitripennis]
BT_Q_SG_ZJU_Unigene4204	gi|291225917|ref|XP_002732945.1|	5.00E-15	PREDICTED: Methyltransferase-like protein 5-like [Saccoglossus kowalevskii]
BT_Q_SG_ZJU_Unigene4213	gi|56412194|gb|AAV88596.1|	2.00E-23	Sparc [Schistocerca gregaria]
BT_Q_SG_ZJU_Unigene4215	gi|170033411|ref|XP_001844571.1|	4.00E-15	FACT complex subunit Ssrp1 [Culex quinquefasciatus] >gi|167874309|gb|EDS37692.1| FACT complex subunit Ssrp1 [Culex quinquefasciatus]
BT_Q_SG_ZJU_Unigene4218	gi|156536985|ref|XP_001608281.1|	5.00E-15	PREDICTED: similar to tetratricopeptide repeat protein [Nasonia vitripennis]
BT_Q_SG_ZJU_Unigene4221	gi|193603776|ref|XP_001950144.1|	9.00E-10	PREDICTED: similar to cell division protein ftsj [Acyrthosiphon pisum]
BT_Q_SG_ZJU_Unigene4222	gi|156551601|ref|XP_001602632.1|	1.00E-11	PREDICTED: similar to LOC496040 protein [Nasonia vitripennis]
BT_Q_SG_ZJU_Unigene4224	gi|242019352|ref|XP_002430125.1|	2.00E-07	tripartite motif-containing protein, putative [Pediculus humanus corporis] >gi|212515216|gb|EEB17387.1| tripartite motif-containing protein, putative [Pediculus humanus corporis]
BT_Q_SG_ZJU_Unigene4226	gi|110756127|ref|XP_001120958.1|	3.00E-17	PREDICTED: similar to mitochondrial ribosomal protein L4 CG5818-PA [Apis mellifera]
BT_Q_SG_ZJU_Unigene4230	gi|156543695|ref|XP_001605601.1|	2.00E-22	PREDICTED: similar to GA18707-PA [Nasonia vitripennis]
BT_Q_SG_ZJU_Unigene4235	gi|156552139|ref|XP_001605562.1|	1.00E-17	PREDICTED: similar to ENSANGP00000018366 [Nasonia vitripennis]
BT_Q_SG_ZJU_Unigene4236	gi|158299186|ref|XP_319306.4|	1.00E-07	AGAP010145-PA [Anopheles gambiae str. PEST] >gi|157014245|gb|EAA13892.5| AGAP010145-PA [Anopheles gambiae str. PEST]
BT_Q_SG_ZJU_Unigene4237	gi|193591985|ref|XP_001948129.1|	2.00E-16	PREDICTED: similar to structural maintenance of chromosomes smc1 [Acyrthosiphon pisum]
BT_Q_SG_ZJU_Unigene4244	gi|289740001|gb|ADD18748.1|	5.00E-14	CDK9 kinase-activating protein cyclin T [Glossina morsitans morsitans]
BT_Q_SG_ZJU_Unigene4247	gi|110762775|ref|XP_001120160.1|	2.00E-11	PREDICTED: similar to phosphatidylinositol glycan, class Q [Apis mellifera]
BT_Q_SG_ZJU_Unigene4252	gi|221128021|ref|XP_002154898.1|	9.00E-18	PREDICTED: similar to DNA-directed RNA polymerase beta chain [Hydra magnipapillata]
BT_Q_SG_ZJU_Unigene4259	gi|301631375|ref|XP_002944773.1|	7.00E-15	PREDICTED: uncharacterized oxidoreductase czcO-like [Xenopus (Silurana) tropicalis]
BT_Q_SG_ZJU_Unigene4263	gi|289743313|gb|ADD20404.1|	9.00E-13	annexin [Glossina morsitans morsitans]
BT_Q_SG_ZJU_Unigene4270	gi|296224682|ref|XP_002758156.1|	8.00E-06	PREDICTED: presenilins-associated rhomboid-like protein, mitochondrial-like isoform 2 [Callithrix jacchus]
BT_Q_SG_ZJU_Unigene4273	gi|193671783|ref|XP_001944699.1|	4.00E-18	PREDICTED: similar to UDP-glucose glycoprotein:glucosyltransferase [Acyrthosiphon pisum]
BT_Q_SG_ZJU_Unigene4278	gi|291243200|ref|XP_002741491.1|	5.00E-24	PREDICTED: proteasome (prosome, macropain) 26S subunit, non-ATPase, 7-like [Saccoglossus kowalevskii]
BT_Q_SG_ZJU_Unigene4280	gi|194880441|ref|XP_001974437.1|	6.00E-12	GG21092 [Drosophila erecta] >gi|190657624|gb|EDV54837.1| GG21092 [Drosophila erecta]
BT_Q_SG_ZJU_Unigene4285	gi|91095067|ref|XP_972655.1|	8.00E-17	PREDICTED: similar to succinyl-coa synthetase beta chain [Tribolium castaneum]
BT_Q_SG_ZJU_Unigene4309	gi|241725531|ref|XP_002412211.1|	3.00E-11	ammonium transporter, putative [Ixodes scapularis] >gi|215505420|gb|EEC14914.1| ammonium transporter, putative [Ixodes scapularis]
BT_Q_SG_ZJU_Unigene4311	gi|118794259|ref|XP_321390.3|	3.00E-08	AGAP001701-PA [Anopheles gambiae str. PEST] >gi|116116209|gb|EAA00879.3| AGAP001701-PA [Anopheles gambiae str. PEST]
BT_Q_SG_ZJU_Unigene4316	gi|156539571|ref|XP_001601646.1|	2.00E-09	PREDICTED: similar to f14p3.9 protein (auxin transport protein) [Nasonia vitripennis]
BT_Q_SG_ZJU_Unigene4340	gi|193594179|ref|XP_001946474.1|	5.00E-08	PREDICTED: similar to AGAP008833-PA [Acyrthosiphon pisum]
BT_Q_SG_ZJU_Unigene4359	gi|156311446|ref|XP_001617786.1|	6.00E-09	hypothetical protein NEMVEDRAFT_v1g225793 [Nematostella vectensis] >gi|156195796|gb|EDO25686.1| predicted protein [Nematostella vectensis]
BT_Q_SG_ZJU_Unigene4360	gi|156543026|ref|XP_001603923.1|	4.00E-07	PREDICTED: similar to AMP dependent ligase [Nasonia vitripennis]
BT_Q_SG_ZJU_Unigene4363	gi|112983392|ref|NP_001036991.1|	4.00E-12	HSP90 cochaperone CDC37 homologue [Bombyx mori] >gi|60592745|dbj|BAD90847.1| HSP90 cochaperone CDC37 homologue [Bombyx mori]
BT_Q_SG_ZJU_Unigene4373	gi|156542594|ref|XP_001604079.1|	7.00E-15	PREDICTED: similar to GA20489-PA [Nasonia vitripennis]
BT_Q_SG_ZJU_Unigene4374	gi|156539697|ref|XP_001602312.1|	3.00E-13	PREDICTED: similar to polyprotein [Nasonia vitripennis]
BT_Q_SG_ZJU_Unigene4423	gi|156552507|ref|XP_001602781.1|	1.00E-10	PREDICTED: similar to equilibrative nucleoside transporter [Nasonia vitripennis]
BT_Q_SG_ZJU_Unigene4424	gi|158299174|ref|XP_319293.4|	1.00E-22	AGAP010138-PA [Anopheles gambiae str. PEST] >gi|157014239|gb|EAA14029.5| AGAP010138-PA [Anopheles gambiae str. PEST]
BT_Q_SG_ZJU_Unigene4433	gi|110766932|ref|XP_624628.2|	4.00E-12	PREDICTED: similar to CG6206-PB, isoform B [Apis mellifera]
BT_Q_SG_ZJU_Unigene4436	gi|215272402|ref|NP_001135804.1|	2.00E-17	CTP synthase [Nasonia vitripennis]
BT_Q_SG_ZJU_Unigene4442	gi|67084081|gb|AAY66975.1|	1.00E-20	mitochondrial malate dehydrogenase [Ixodes scapularis]
BT_Q_SG_ZJU_Unigene4454	gi|198432537|ref|XP_002131641.1|	3.00E-20	PREDICTED: similar to signal recognition particle 54 [Ciona intestinalis]
BT_Q_SG_ZJU_Unigene4473	gi|91088135|ref|XP_970927.1|	4.00E-15	PREDICTED: similar to nuclear protein localization [Tribolium castaneum]
BT_Q_SG_ZJU_Unigene4475	gi|189241159|ref|XP_974566.2|	5.00E-08	PREDICTED: similar to receptor-type tyrosine-protein phosphatase N2 [Tribolium castaneum]
BT_Q_SG_ZJU_Unigene4476	gi|148229264|ref|NP_001086961.1|	9.00E-10	zinc finger CCCH domain-containing protein 15 [Xenopus laevis] >gi|82182343|sp|Q6DD06.1|ZC3HF_XENLA RecName: Full=Zinc finger CCCH domain-containing protein 15; AltName: Full=DRG family-regulatory protein 1 >gi|50417682|gb|AAH77826.1| MGC80486 protein [Xenopus laevis] >gi|58530626|dbj|BAD89267.1| DRG family regulatory protein 1 [Xenopus laevis]
BT_Q_SG_ZJU_Unigene4480	gi|91081223|ref|XP_975626.1|	2.00E-09	PREDICTED: similar to AGAP003014-PA [Tribolium castaneum]
BT_Q_SG_ZJU_Unigene4487	gi|301629441|ref|XP_002943848.1|	4.00E-10	PREDICTED: nicotinate phosphoribosyltransferase-like [Xenopus (Silurana) tropicalis]
BT_Q_SG_ZJU_Unigene4499	gi|260908288|gb|ACX53865.1|	3.00E-23	40S ribosomal protein S13 [Rhipicephalus sanguineus]
BT_Q_SG_ZJU_Unigene4501	gi|193573500|ref|XP_001943319.1|	3.00E-16	PREDICTED: similar to Autophagy-specific gene 7 CG5489-PA [Acyrthosiphon pisum]
BT_Q_SG_ZJU_Unigene4513	gi|118490660|ref|XP_001238639.1|	3.00E-06	hypothetical protein [Eimeria tenella] >gi|109238422|emb|CAK51386.1| hypothetical protein [Eimeria tenella]
BT_Q_SG_ZJU_Unigene4517	gi|291243428|ref|XP_002741599.1|	2.00E-17	PREDICTED: mitochondrial processing peptidase beta subunit-like [Saccoglossus kowalevskii]
BT_Q_SG_ZJU_Unigene4529	gi|156547972|ref|XP_001605127.1|	2.00E-09	PREDICTED: similar to nuclear pore complex protein nup154 [Nasonia vitripennis]
BT_Q_SG_ZJU_Unigene4547	gi|256773186|ref|NP_001157948.1|	2.00E-26	sarco/endoplasmic reticulum calcium ATPase [Bombyx mori] >gi|255661412|gb|ACU25861.1| sarco/endoplasmic reticulum calcium ATPase [Bombyx mori]
BT_Q_SG_ZJU_Unigene4555	gi|91077292|ref|XP_974520.1|	6.00E-28	PREDICTED: similar to Splicing factor 3A subunit 3 (Spliceosome-associated protein 61) (SAP 61) (SF3a60) [Tribolium castaneum]
BT_Q_SG_ZJU_Unigene4574	gi|157133556|ref|XP_001662930.1|	4.00E-09	lipase [Aedes aegypti] >gi|108870787|gb|EAT35012.1| lipase [Aedes aegypti]
BT_Q_SG_ZJU_Unigene4577	gi|295393298|gb|ADG03469.1|	8.00E-24	heat shock protein 90 [Bemisia tabaci]
BT_Q_SG_ZJU_Unigene4583	gi|158285765|ref|XP_308450.4|	6.00E-20	AGAP007381-PA [Anopheles gambiae str. PEST] >gi|157020150|gb|EAA04452.4| AGAP007381-PA [Anopheles gambiae str. PEST]
BT_Q_SG_ZJU_Unigene4585	gi|193700116|ref|XP_001943361.1|	1.00E-17	PREDICTED: similar to AGAP000261-PA [Acyrthosiphon pisum]
BT_Q_SG_ZJU_Unigene4587	gi|157107456|ref|XP_001649787.1|	2.00E-11	alpha-amylase [Aedes aegypti] >gi|108884073|gb|EAT48298.1| alpha-amylase [Aedes aegypti]
BT_Q_SG_ZJU_Unigene4590	gi|110755068|ref|XP_625025.2|	1.00E-21	PREDICTED: similar to CG10542-PA [Apis mellifera]
BT_Q_SG_ZJU_Unigene4591	gi|193627171|ref|XP_001948611.1|	2.00E-21	PREDICTED: similar to ATP-binding cassette transporter, subfamily B, member 14, group MDR/PGP protein PpABCB14, partial [Acyrthosiphon pisum]
BT_Q_SG_ZJU_Unigene4604	gi|299834811|gb|ADJ56549.1|	3.00E-23	NADH dehydrogenase subunit 2 [Homo sapiens]
BT_Q_SG_ZJU_Unigene4609	gi|301775280|ref|XP_002923048.1|	2.00E-24	PREDICTED: proteasome subunit alpha type-4-like [Ailuropoda melanoleuca]
BT_Q_SG_ZJU_Unigene4619	gi|269784695|ref|NP_001161449.1|	4.00E-07	ATP synthase subunit alpha, mitochondrial precursor [Nasonia vitripennis]
BT_Q_SG_ZJU_Unigene4622	gi|91076410|ref|XP_969526.1|	8.00E-24	PREDICTED: similar to AGAP011050-PA [Tribolium castaneum]
BT_Q_SG_ZJU_Unigene4648	gi|239789205|dbj|BAH71242.1|	5.00E-13	ACYPI010154 [Acyrthosiphon pisum]
BT_Q_SG_ZJU_Unigene4649	gi|91081701|ref|XP_970909.1|	2.00E-06	PREDICTED: similar to Pvf3 CG34378-PD [Tribolium castaneum] >gi|270006461|gb|EFA02909.1| PDGF- and VEGF-related factor 3 [Tribolium castaneum]
BT_Q_SG_ZJU_Unigene4654	gi|91077766|ref|XP_968426.1|	8.00E-14	PREDICTED: similar to WD repeat domain 45 [Tribolium castaneum]
BT_Q_SG_ZJU_Unigene4656	gi|66819033|ref|XP_643176.1|	9.00E-10	AMP-dependent synthetase and ligase domain-containing protein [Dictyostelium discoideum AX4] >gi|60471287|gb|EAL69249.1| AMP-dependent synthetase and ligase domain-containing protein [Dictyostelium discoideum AX4]
BT_Q_SG_ZJU_Unigene4670	gi|189234161|ref|XP_967052.2|	4.00E-25	PREDICTED: similar to jumonji domain containing 1A [Tribolium castaneum]
BT_Q_SG_ZJU_Unigene4671	gi|110769648|ref|XP_001123143.1|	1.00E-10	PREDICTED: similar to TR4 orphan receptor associated protein TRA16 [Apis mellifera]
BT_Q_SG_ZJU_Unigene4673	gi|241157065|ref|XP_002407939.1|	7.00E-09	mRNA capping enzyme, putative [Ixodes scapularis] >gi|215494253|gb|EEC03894.1| mRNA capping enzyme, putative [Ixodes scapularis]
BT_Q_SG_ZJU_Unigene4676	gi|296485891|gb|DAA28006.1|	8.00E-08	SWI/SNF-related matrix-associated actin-dependent regulator of chromatin a4 [Bos taurus]
BT_Q_SG_ZJU_Unigene4683	gi|289739793|gb|ADD18644.1|	2.00E-22	vacuolar H+-ATPase v1 sector subunit D [Glossina morsitans morsitans]
BT_Q_SG_ZJU_Unigene4684	gi|170052143|ref|XP_001862088.1|	1.00E-14	WD repeat protein 23 [Culex quinquefasciatus] >gi|167873113|gb|EDS36496.1| WD repeat protein 23 [Culex quinquefasciatus]
BT_Q_SG_ZJU_Unigene4686	gi|114696905|ref|XP_001150275.1|	1.00E-16	PREDICTED: similar to TPA_inf: HDC02932 [Pan troglodytes]
BT_Q_SG_ZJU_Unigene4690	gi|110757793|ref|XP_001120416.1|	2.00E-24	PREDICTED: similar to RNA polymerase I 135kD subunit CG4033-PA [Apis mellifera]
BT_Q_SG_ZJU_Unigene4699	gi|115676880|ref|XP_793285.2|	6.00E-19	PREDICTED: similar to topoisomerase I beta [Strongylocentrotus purpuratus] >gi|115930041|ref|XP_001196536.1| PREDICTED: similar to topoisomerase I beta [Strongylocentrotus purpuratus]
BT_Q_SG_ZJU_Unigene4705	gi|193610539|ref|XP_001949649.1|	1.00E-10	PREDICTED: similar to AGAP000195-PA [Acyrthosiphon pisum]
BT_Q_SG_ZJU_Unigene4714	gi|118778116|ref|XP_001238802.1|	1.00E-07	AGAP007366-PA [Anopheles gambiae str. PEST] >gi|118778118|ref|XP_001237084.1| AGAP007366-PB [Anopheles gambiae str. PEST] >gi|116132227|gb|EAU77628.1| AGAP007366-PA [Anopheles gambiae str. PEST] >gi|116132228|gb|EAU77629.1| AGAP007366-PB [Anopheles gambiae str. PEST]
BT_Q_SG_ZJU_Unigene4717	gi|91076876|ref|XP_976197.1|	7.00E-18	PREDICTED: similar to Bmsqd-2 isoform 3 [Tribolium castaneum]
BT_Q_SG_ZJU_Unigene4725	gi|290756748|gb|ADD52940.1|	2.00E-29	glyceraldhyde-3-phosphate dehydrogenase [Angerona prunaria]
BT_Q_SG_ZJU_Unigene4726	gi|262303379|gb|ACY44282.1|	6.00E-29	translational elongation factor-2 [Acheta domesticus]
BT_Q_SG_ZJU_Unigene4740	gi|256092287|ref|XP_002581890.1|	5.00E-07	hypothetical protein [Schistosoma mansoni] >gi|238668207|emb|CAZ38130.1| hypothetical protein [Schistosoma mansoni]
BT_Q_SG_ZJU_Unigene4750	gi|193610472|ref|XP_001943443.1|	6.00E-17	PREDICTED: similar to calbindin-32 [Acyrthosiphon pisum]
BT_Q_SG_ZJU_Unigene4755	gi|195592412|ref|XP_002085929.1|	1.00E-16	GD12059 [Drosophila simulans] >gi|194197938|gb|EDX11514.1| GD12059 [Drosophila simulans]
BT_Q_SG_ZJU_Unigene4760	gi|242004660|ref|XP_002423198.1|	2.00E-07	conserved hypothetical protein [Pediculus humanus corporis] >gi|212506163|gb|EEB10460.1| conserved hypothetical protein [Pediculus humanus corporis]
BT_Q_SG_ZJU_Unigene4761	gi|238683705|gb|ACR54131.1|	3.00E-11	NADH dehydrogenase [Palaemonetes varians]
BT_Q_SG_ZJU_Unigene4766	gi|301629908|ref|XP_002944070.1|	3.00E-06	PREDICTED: UPF0246 protein Aave_1172-like [Xenopus (Silurana) tropicalis]
BT_Q_SG_ZJU_Unigene4771	gi|195375170|ref|XP_002046376.1|	2.00E-09	GJ12865 [Drosophila virilis] >gi|194153534|gb|EDW68718.1| GJ12865 [Drosophila virilis]
BT_Q_SG_ZJU_Unigene4773	gi|193657443|ref|XP_001945387.1|	1.00E-10	PREDICTED: similar to alpha-aminoadipate aminotransferase [Acyrthosiphon pisum]
BT_Q_SG_ZJU_Unigene4784	gi|195111811|ref|XP_002000470.1|	2.00E-06	GI10247 [Drosophila mojavensis] >gi|193917064|gb|EDW15931.1| GI10247 [Drosophila mojavensis]
BT_Q_SG_ZJU_Unigene4788	gi|281201653|gb|EFA75861.1|	2.00E-06	Glycolate oxidase subunit D-like protein [Polysphondylium pallidum PN500]
BT_Q_SG_ZJU_Unigene4792	gi|91089465|ref|XP_968623.1|	7.00E-10	PREDICTED: similar to CG9246 CG9246-PA [Tribolium castaneum]
BT_Q_SG_ZJU_Unigene4794	gi|3282366|gb|AAC24972.1|	4.00E-07	reverse transcriptase [Drosophila yakuba]
BT_Q_SG_ZJU_Unigene4795	gi|66524764|ref|XP_623518.1|	9.00E-07	PREDICTED: similar to Proline synthetase co-transcribed bacterial homolog protein [Apis mellifera]
BT_Q_SG_ZJU_Unigene4808	gi|189237681|ref|XP_001813148.1|	2.00E-10	PREDICTED: similar to growth factor receptor-bound protein 14 [Tribolium castaneum]
BT_Q_SG_ZJU_Unigene4809	gi|193636713|ref|XP_001949730.1|	7.00E-10	PREDICTED: similar to cortactin [Acyrthosiphon pisum]
BT_Q_SG_ZJU_Unigene4825	gi|195472823|ref|XP_002088698.1|	5.00E-06	GE11277 [Drosophila yakuba] >gi|194174799|gb|EDW88410.1| GE11277 [Drosophila yakuba]
BT_Q_SG_ZJU_Unigene4830	gi|292621347|ref|XP_002664626.1|	3.00E-10	PREDICTED: BRCA1 interacting protein C-terminal helicase 1-like [Danio rerio]
BT_Q_SG_ZJU_Unigene4832	gi|301632088|ref|XP_002945123.1|	1.00E-12	PREDICTED: copia protein-like [Xenopus (Silurana) tropicalis]
BT_Q_SG_ZJU_Unigene4840	gi|156540772|ref|XP_001600265.1|	8.00E-19	PREDICTED: similar to LP09268p [Nasonia vitripennis]
BT_Q_SG_ZJU_Unigene4843	gi|189239891|ref|XP_969420.2|	3.00E-18	PREDICTED: similar to zinc finger protein 650 [Tribolium castaneum]
BT_Q_SG_ZJU_Unigene4845	gi|118792106|ref|XP_320159.3|	2.00E-08	AGAP012399-PA [Anopheles gambiae str. PEST] >gi|116116741|gb|EAA00357.4| AGAP012399-PA [Anopheles gambiae str. PEST]
BT_Q_SG_ZJU_Unigene4849	gi|110763899|ref|XP_001119916.1|	8.00E-08	PREDICTED: similar to CG3983-PB, isoform B [Apis mellifera]
BT_Q_SG_ZJU_Unigene4856	gi|115636696|ref|XP_001190437.1|	9.00E-15	PREDICTED: similar to UBX domain containing 1 [Strongylocentrotus purpuratus] >gi|115650724|ref|XP_001198732.1| PREDICTED: similar to UBX domain containing 1 [Strongylocentrotus purpuratus]
BT_Q_SG_ZJU_Unigene4859	gi|91084687|ref|XP_968830.1|	3.00E-09	PREDICTED: similar to myotubularin [Tribolium castaneum]
BT_Q_SG_ZJU_Unigene4869	gi|118097032|ref|XP_414409.2|	1.00E-10	PREDICTED: similar to member of the histidine triad (HIT) gene family [Gallus gallus]
BT_Q_SG_ZJU_Unigene4876	gi|207367174|dbj|BAG72107.1|	5.00E-22	chaperonin zeta subunit [Delia antiqua]
BT_Q_SG_ZJU_Unigene4887	gi|270014238|gb|EFA10686.1|	2.00E-26	Syntaxin 1A [Tribolium castaneum]
BT_Q_SG_ZJU_Unigene4896	gi|170050950|ref|XP_001861542.1|	3.00E-20	phosphoglucomutase [Culex quinquefasciatus] >gi|167872419|gb|EDS35802.1| phosphoglucomutase [Culex quinquefasciatus]
BT_Q_SG_ZJU_Unigene4897	gi|193580230|ref|XP_001947055.1|	4.00E-08	PREDICTED: similar to eukaryotic translation initiation factor 2B, subunit 5 epsilon [Acyrthosiphon pisum]
BT_Q_SG_ZJU_Unigene4903	gi|2108222|gb|AAB72001.1|	2.00E-07	vitellogenin [Riptortus clavatus]
BT_Q_SG_ZJU_Unigene4906	gi|91086195|ref|XP_971475.1|	4.00E-26	PREDICTED: similar to protein transport protein sec23 [Tribolium castaneum]
BT_Q_SG_ZJU_Unigene4909	gi|195454119|ref|XP_002074095.1|	1.00E-21	GK12802 [Drosophila willistoni] >gi|194170180|gb|EDW85081.1| GK12802 [Drosophila willistoni]
BT_Q_SG_ZJU_Unigene4911	gi|238053975|ref|NP_001153908.1|	3.00E-11	piwi-like protein 1 [Oryzias latipes] >gi|171673168|gb|ACB47463.1| piwi-like protein 1 [Oryzias latipes]
BT_Q_SG_ZJU_Unigene4912	gi|193683680|ref|XP_001946412.1|	3.00E-23	PREDICTED: similar to AGAP005175-PA [Acyrthosiphon pisum]
BT_Q_SG_ZJU_Unigene4917	gi|121543821|gb|ABM55575.1|	9.00E-20	ribosomal protein L31-like protein [Maconellicoccus hirsutus]
BT_Q_SG_ZJU_Unigene4930	gi|48095590|ref|XP_392325.1|	2.00E-29	PREDICTED: similar to Dead-box-1 CG9054-PA isoform 1 [Apis mellifera]
BT_Q_SG_ZJU_Unigene4934	gi|194745915|ref|XP_001955430.1|	3.00E-09	GF18761 [Drosophila ananassae] >gi|190628467|gb|EDV43991.1| GF18761 [Drosophila ananassae]
BT_Q_SG_ZJU_Unigene4935	gi|189235274|ref|XP_973290.2|	3.00E-22	PREDICTED: similar to bat5 hla-b-associated transcript [Tribolium castaneum]
BT_Q_SG_ZJU_Unigene4956	gi|193688247|ref|XP_001945403.1|	2.00E-18	PREDICTED: similar to solute carrier family 23 member 2, partial [Acyrthosiphon pisum]
BT_Q_SG_ZJU_Unigene4957	gi|299834811|gb|ADJ56549.1|	1.00E-24	NADH dehydrogenase subunit 2 [Homo sapiens]
BT_Q_SG_ZJU_Unigene4962	gi|156549234|ref|XP_001605558.1|	2.00E-20	PREDICTED: similar to eIF2B-alpha protein [Nasonia vitripennis]
BT_Q_SG_ZJU_Unigene4969	gi|7415513|dbj|BAA93433.1|	5.00E-16	glutathione reductase [Physarum polycephalum]
BT_Q_SG_ZJU_Unigene4980	gi|110764564|ref|XP_623807.2|	9.00E-15	PREDICTED: similar to Pomp CG9324-PA [Apis mellifera]
BT_Q_SG_ZJU_Unigene4989	gi|110751156|ref|XP_001121513.1|	9.00E-10	PREDICTED: similar to CG10955-PA [Apis mellifera]
BT_Q_SG_ZJU_Unigene4996	gi|238477329|gb|ACR43476.1|	5.00E-07	triosephosphate isomerase [Crangon crangon]
BT_Q_SG_ZJU_Unigene5012	gi|167392316|ref|XP_001740099.1|	1.00E-10	dipeptidyl-peptidase 5 precursor [Entamoeba dispar SAW760]
BT_Q_SG_ZJU_Unigene5015	gi|158294602|ref|XP_315706.4|	2.00E-18	AGAP005699-PA [Anopheles gambiae str. PEST] >gi|157015640|gb|EAA10732.5| AGAP005699-PA [Anopheles gambiae str. PEST]
BT_Q_SG_ZJU_Unigene5018	gi|156543082|ref|XP_001605136.1|	1.00E-25	PREDICTED: similar to uridine cytidine kinase i [Nasonia vitripennis]
BT_Q_SG_ZJU_Unigene5027	gi|158300807|ref|XP_320636.4|	3.00E-09	AGAP011889-PA [Anopheles gambiae str. PEST] >gi|157013339|gb|EAA00148.4| AGAP011889-PA [Anopheles gambiae str. PEST]
BT_Q_SG_ZJU_Unigene5034	gi|189236792|ref|XP_966417.2|	6.00E-32	PREDICTED: similar to protein phosphatase 1, catalytic subunit, beta isoform 1 [Tribolium castaneum]
BT_Q_SG_ZJU_Unigene5035	gi|242021654|ref|XP_002431259.1|	4.00E-11	conserved hypothetical protein [Pediculus humanus corporis] >gi|212516513|gb|EEB18521.1| conserved hypothetical protein [Pediculus humanus corporis]
BT_Q_SG_ZJU_Unigene5049	gi|225714056|gb|ACO12874.1|	2.00E-10	DNA polymerase epsilon subunit 4 [Lepeophtheirus salmonis]
BT_Q_SG_ZJU_Unigene5052	gi|198460254|ref|XP_002138796.1|	5.00E-07	GA24192 [Drosophila pseudoobscura pseudoobscura] >gi|198136951|gb|EDY69354.1| GA24192 [Drosophila pseudoobscura pseudoobscura]
BT_Q_SG_ZJU_Unigene5054	gi|12034854|gb|AAG46031.1|AF309637_1	2.00E-26	6-phospho-beta-glucosidase-like protein [Leishmania infantum]
BT_Q_SG_ZJU_Unigene5071	gi|110748957|ref|XP_001121270.1|	2.00E-07	PREDICTED: similar to ADP-ribosylation factor-like 6 interacting protein 4 [Apis mellifera]
BT_Q_SG_ZJU_Unigene5099	gi|291224375|ref|XP_002732180.1|	3.00E-17	PREDICTED: arginyltransferase 1-like [Saccoglossus kowalevskii]
BT_Q_SG_ZJU_Unigene5103	gi|193688300|ref|XP_001943122.1|	7.00E-17	PREDICTED: similar to nad dehydrogenase [Acyrthosiphon pisum]
BT_Q_SG_ZJU_Unigene5107	gi|91078722|ref|XP_967156.1|	4.00E-08	PREDICTED: similar to ubiquitin carboxyl-terminal hydrolase 5 [Tribolium castaneum]
BT_Q_SG_ZJU_Unigene5112	gi|198463156|ref|XP_001352716.2|	4.00E-17	GA22158 [Drosophila pseudoobscura pseudoobscura] >gi|198151136|gb|EAL30216.2| GA22158 [Drosophila pseudoobscura pseudoobscura]
BT_Q_SG_ZJU_Unigene5120	gi|193685998|ref|XP_001943516.1|	1.00E-22	PREDICTED: similar to guanine nucleotide-binding protein beta 2 (g protein beta2) [Acyrthosiphon pisum]
BT_Q_SG_ZJU_Unigene5121	gi|194742644|ref|XP_001953811.1|	8.00E-08	GF17952 [Drosophila ananassae] >gi|190626848|gb|EDV42372.1| GF17952 [Drosophila ananassae]
BT_Q_SG_ZJU_Unigene5122	gi|148298695|ref|NP_001091823.1|	3.00E-21	poly A binding protein [Bombyx mori] >gi|111608107|gb|ABH10797.1| poly A binding protein [Bombyx mori]
BT_Q_SG_ZJU_Unigene5130	gi|199584541|gb|ACH90395.1|	6.00E-21	glutathione-S-transferase [Bemisia tabaci]
BT_Q_SG_ZJU_Unigene5131	gi|259906587|gb|ACW84383.1|	1.00E-26	GTPase [Fenneropenaeus chinensis]
BT_Q_SG_ZJU_Unigene5141	gi|156456450|gb|ABU65393.1|	2.00E-27	ATP synthase F0 subunit 8 [Homo sapiens] >gi|223012305|gb|ACM74228.1| ATP synthase F0 subunit 8 [Homo sapiens]
BT_Q_SG_ZJU_Unigene5150	gi|224051233|ref|XP_002200433.1|	2.00E-15	PREDICTED: similar to RNA binding motif protein 25 [Taeniopygia guttata]
BT_Q_SG_ZJU_Unigene5154	gi|110758672|ref|XP_395581.3|	7.00E-15	PREDICTED: similar to APG9 autophagy 9-like 1 [Apis mellifera]
BT_Q_SG_ZJU_Unigene5157	gi|114051584|ref|NP_001040309.1|	3.00E-09	ATP binding protein [Bombyx mori] >gi|87248267|gb|ABD36186.1| ATP binding protein [Bombyx mori]
BT_Q_SG_ZJU_Unigene5162	gi|193676215|ref|XP_001942529.1|	6.00E-08	PREDICTED: similar to mitochondrial ribosomal protein L30 CG7038-PA [Acyrthosiphon pisum]
BT_Q_SG_ZJU_Unigene5166	gi|193669332|ref|XP_001945128.1|	1.00E-09	PREDICTED: similar to phosphoglucomutase [Acyrthosiphon pisum]
BT_Q_SG_ZJU_Unigene5167	gi|66529825|ref|XP_624000.1|	2.00E-08	PREDICTED: similar to Exosome complex exonuclease RRP43 (Ribosomal RNA-processing protein 43) (Exosome component 8) (p9) (Opa-interacting protein 2) [Apis mellifera]
BT_Q_SG_ZJU_Unigene5172	gi|110758954|ref|XP_392763.2|	4.00E-24	PREDICTED: similar to CG4617-PA [Apis mellifera]
BT_Q_SG_ZJU_Unigene5174	gi|242021006|ref|XP_002430938.1|	8.00E-08	conserved hypothetical protein [Pediculus humanus corporis] >gi|212516156|gb|EEB18200.1| conserved hypothetical protein [Pediculus humanus corporis]
BT_Q_SG_ZJU_Unigene5183	gi|198429088|ref|XP_002120307.1|	1.00E-15	PREDICTED: similar to cathepsin B [Ciona intestinalis]
BT_Q_SG_ZJU_Unigene5184	gi|148695736|gb|EDL27683.1|	3.00E-20	APAF1 interacting protein, isoform CRA_a [Mus musculus]
BT_Q_SG_ZJU_Unigene5185	gi|195442794|ref|XP_002069131.1|	9.00E-07	GK23844 [Drosophila willistoni] >gi|194165216|gb|EDW80117.1| GK23844 [Drosophila willistoni]
BT_Q_SG_ZJU_Unigene5201	gi|48100966|ref|XP_392639.1|	7.00E-28	PREDICTED: similar to bellwether CG3612-PA isoform 1 [Apis mellifera]
BT_Q_SG_ZJU_Unigene5202	gi|291227543|ref|XP_002733743.1|	3.00E-26	PREDICTED: adhesion regulating molecule 1-like [Saccoglossus kowalevskii]
BT_Q_SG_ZJU_Unigene5203	gi|156538356|ref|XP_001604761.1|	5.00E-11	PREDICTED: similar to GA15227-PA [Nasonia vitripennis]
BT_Q_SG_ZJU_Unigene5207	gi|156549603|ref|XP_001603500.1|	3.00E-20	PREDICTED: similar to glycosyl transferase [Nasonia vitripennis]
BT_Q_SG_ZJU_Unigene5209	gi|91083101|ref|XP_969476.1|	4.00E-12	PREDICTED: similar to MGC88883 protein [Tribolium castaneum]
BT_Q_SG_ZJU_Unigene5210	gi|194914069|ref|XP_001982791.1|	1.00E-10	GG16479 [Drosophila erecta] >gi|190659940|gb|EDV57148.1| GG16479 [Drosophila erecta]
BT_Q_SG_ZJU_Unigene5213	gi|195020101|ref|XP_001985121.1|	6.00E-13	GH14686 [Drosophila grimshawi] >gi|193898603|gb|EDV97469.1| GH14686 [Drosophila grimshawi]
BT_Q_SG_ZJU_Unigene5227	gi|66515291|ref|XP_394767.2|	2.00E-13	PREDICTED: similar to CG6769-PA isoform 1 [Apis mellifera]
BT_Q_SG_ZJU_Unigene5232	gi|193645779|ref|XP_001950683.1|	7.00E-15	PREDICTED: similar to AGAP012703-PA [Acyrthosiphon pisum]
BT_Q_SG_ZJU_Unigene5233	gi|156542829|ref|XP_001608109.1|	3.00E-31	PREDICTED: similar to Cbp20 [Nasonia vitripennis]
BT_Q_SG_ZJU_Unigene5237	gi|91082013|ref|XP_969905.1|	1.00E-21	PREDICTED: similar to coatomer [Tribolium castaneum]
BT_Q_SG_ZJU_Unigene5242	gi|193669334|ref|XP_001945180.1|	1.00E-14	PREDICTED: similar to exo70 CG7127-PA [Acyrthosiphon pisum]
BT_Q_SG_ZJU_Unigene5253	gi|225581061|gb|ACN94638.1|	2.00E-16	GA17568 [Drosophila miranda]
BT_Q_SG_ZJU_Unigene5268	gi|91082581|ref|XP_967080.1|	2.00E-26	PREDICTED: similar to CG17271 CG17271-PA [Tribolium castaneum]
BT_Q_SG_ZJU_Unigene5277	gi|91077726|ref|XP_975075.1|	2.00E-07	PREDICTED: similar to rCG41584 [Tribolium castaneum]
BT_Q_SG_ZJU_Unigene5282	gi|156553129|ref|XP_001599839.1|	2.00E-27	PREDICTED: similar to eukaryotic translation initiation factor 4A [Nasonia vitripennis]
BT_Q_SG_ZJU_Unigene5284	gi|63365252|gb|AAY40757.1|	2.00E-10	TIMELESS [Aedes aegypti]
BT_Q_SG_ZJU_Unigene5291	gi|157131950|ref|XP_001662376.1|	3.00E-09	survival motor neuron protein [Aedes aegypti] >gi|94469142|gb|ABF18420.1| splicing factor SPF30 [Aedes aegypti] >gi|108871341|gb|EAT35566.1| survival motor neuron protein [Aedes aegypti]
BT_Q_SG_ZJU_Unigene5292	gi|301630589|ref|XP_002944399.1|	5.00E-21	PREDICTED: enolase-like [Xenopus (Silurana) tropicalis]
BT_Q_SG_ZJU_Unigene5294	gi|193669115|ref|XP_001950156.1|	2.00E-13	PREDICTED: similar to 28S ribosomal protein S5 [Acyrthosiphon pisum]
BT_Q_SG_ZJU_Unigene5299	gi|292613347|ref|XP_002661892.1|	1.00E-12	PREDICTED: LReO_3-like [Danio rerio]
BT_Q_SG_ZJU_Unigene5310	gi|301632399|ref|XP_002945274.1|	5.00E-15	PREDICTED: histone H3.2-like, partial [Xenopus (Silurana) tropicalis]
BT_Q_SG_ZJU_Unigene5312	gi|170064956|ref|XP_001867741.1|	6.00E-14	prolyl 4-hydroxylase alpha subunit 1 [Culex quinquefasciatus] >gi|167882144|gb|EDS45527.1| prolyl 4-hydroxylase alpha subunit 1 [Culex quinquefasciatus]
BT_Q_SG_ZJU_Unigene5314	gi|195056178|ref|XP_001994989.1|	4.00E-26	GH22904 [Drosophila grimshawi] >gi|193899195|gb|EDV98061.1| GH22904 [Drosophila grimshawi]
BT_Q_SG_ZJU_Unigene5317	gi|170048382|ref|XP_001852243.1|	5.00E-07	anon-35F/36A [Culex quinquefasciatus] >gi|167870526|gb|EDS33909.1| anon-35F/36A [Culex quinquefasciatus]
BT_Q_SG_ZJU_Unigene5329	gi|66509421|ref|XP_624702.1|	2.00E-19	PREDICTED: similar to CG12082-PA [Apis mellifera]
BT_Q_SG_ZJU_Unigene5331	gi|156542829|ref|XP_001608109.1|	1.00E-31	PREDICTED: similar to Cbp20 [Nasonia vitripennis]
BT_Q_SG_ZJU_Unigene5334	gi|156545156|ref|XP_001602949.1|	1.00E-12	PREDICTED: hypothetical protein [Nasonia vitripennis]
BT_Q_SG_ZJU_Unigene5343	gi|209489211|gb|ACI48996.1|	8.00E-06	hypothetical protein Cbre_JD01.003 [Caenorhabditis brenneri]
BT_Q_SG_ZJU_Unigene5351	gi|198453837|ref|XP_001359359.2|	2.00E-06	GA15248 [Drosophila pseudoobscura pseudoobscura] >gi|198132536|gb|EAL28505.2| GA15248 [Drosophila pseudoobscura pseudoobscura]
BT_Q_SG_ZJU_Unigene5355	gi|156552804|ref|XP_001599148.1|	1.00E-16	PREDICTED: similar to signal recognition particle 14 kDa protein-like protein [Nasonia vitripennis]
BT_Q_SG_ZJU_Unigene5359	gi|193636613|ref|XP_001945935.1|	2.00E-08	PREDICTED: similar to mKIAA1530 protein [Acyrthosiphon pisum]
BT_Q_SG_ZJU_Unigene5361	gi|156185986|gb|ABU55311.1|	7.00E-18	excinuclease ABC subunit B [Callosobruchus chinensis]
BT_Q_SG_ZJU_Unigene5373	gi|195108665|ref|XP_001998913.1|	3.00E-21	GI23366 [Drosophila mojavensis] >gi|193915507|gb|EDW14374.1| GI23366 [Drosophila mojavensis]
BT_Q_SG_ZJU_Unigene5375	gi|239791004|dbj|BAH72024.1|	7.00E-07	ACYPI27259 [Acyrthosiphon pisum]
BT_Q_SG_ZJU_Unigene5377	gi|91077850|ref|XP_971897.1|	4.00E-18	PREDICTED: similar to metalloprotease [Tribolium castaneum]
BT_Q_SG_ZJU_Unigene5393	gi|158289324|ref|XP_311074.4|	8.00E-14	AGAP000078-PA [Anopheles gambiae str. PEST] >gi|157019000|gb|EAA06223.4| AGAP000078-PA [Anopheles gambiae str. PEST]
BT_Q_SG_ZJU_Unigene5395	gi|193690926|ref|XP_001950257.1|	2.00E-07	PREDICTED: similar to suppressor of ty [Acyrthosiphon pisum]
BT_Q_SG_ZJU_Unigene5396	gi|73972594|ref|XP_532112.2|	8.00E-06	PREDICTED: similar to 40S ribosomal protein S10 [Canis familiaris]
BT_Q_SG_ZJU_Unigene5399	gi|156552384|ref|XP_001602726.1|	1.00E-20	PREDICTED: similar to arsenite-resistance protein [Nasonia vitripennis]
BT_Q_SG_ZJU_Unigene5405	gi|221091014|ref|XP_002169996.1|	2.00E-08	PREDICTED: similar to conserved hypothetical protein [Hydra magnipapillata]
BT_Q_SG_ZJU_Unigene5411	gi|110762101|ref|XP_001121860.1|	3.00E-08	PREDICTED: similar to CG6621-PA [Apis mellifera]
BT_Q_SG_ZJU_Unigene5412	gi|289740333|gb|ADD18914.1|	2.00E-20	RNA polymerase I transcription factor subunit Spp27 [Glossina morsitans morsitans]
BT_Q_SG_ZJU_Unigene5423	gi|110763142|ref|XP_001122170.1|	1.00E-08	PREDICTED: similar to CG5434-PA [Apis mellifera]
BT_Q_SG_ZJU_Unigene5429	gi|289739717|gb|ADD18606.1|	2.00E-24	multifunctional chaperone [Glossina morsitans morsitans]
BT_Q_SG_ZJU_Unigene5435	gi|219911523|emb|CAX11687.1|	2.00E-15	adenylosuccinate lyase [Nilaparvata lugens]
BT_Q_SG_ZJU_Unigene5445	gi|110763919|ref|XP_624824.2|	4.00E-28	PREDICTED: similar to ADP-ribosylation factor-like 10C [Apis mellifera]
BT_Q_SG_ZJU_Unigene5454	gi|239788565|dbj|BAH70957.1|	1.00E-24	ACYPI005157 [Acyrthosiphon pisum]
BT_Q_SG_ZJU_Unigene5467	gi|242022075|ref|XP_002431467.1|	5.00E-16	succinate dehydrogenase, flavoprotein subunit [Pediculus humanus corporis] >gi|212516755|gb|EEB18729.1| succinate dehydrogenase, flavoprotein subunit [Pediculus humanus corporis]
BT_Q_SG_ZJU_Unigene5469	gi|126324300|ref|XP_001374549.1|	1.00E-06	PREDICTED: similar to KIAA1520 splice [Monodelphis domestica]
BT_Q_SG_ZJU_Unigene5471	gi|301630819|ref|XP_002944514.1|	4.00E-10	PREDICTED: chaperone protein clpB-like, partial [Xenopus (Silurana) tropicalis]
BT_Q_SG_ZJU_Unigene5488	gi|282400160|ref|NP_001164203.1|	3.00E-17	cannonball [Tribolium castaneum] >gi|270008125|gb|EFA04573.1| cannonball [Tribolium castaneum]
BT_Q_SG_ZJU_Unigene5492	gi|189236890|ref|XP_967583.2|	1.00E-07	PREDICTED: similar to ring finger [Tribolium castaneum]
BT_Q_SG_ZJU_Unigene5498	gi|301630809|ref|XP_002944509.1|	1.00E-16	PREDICTED: acriflavine resistance protein B-like [Xenopus (Silurana) tropicalis]
BT_Q_SG_ZJU_Unigene5501	gi|193669092|ref|XP_001944635.1|	4.00E-19	PREDICTED: similar to mKIAA0609 protein [Acyrthosiphon pisum]
BT_Q_SG_ZJU_Unigene5507	gi|110761008|ref|XP_393830.3|	1.00E-08	PREDICTED: similar to angio-associated, migratory cell protein [Apis mellifera]
BT_Q_SG_ZJU_Unigene5513	gi|66508222|ref|XP_623854.1|	1.00E-12	PREDICTED: similar to CG5484-PC, isoform C [Apis mellifera]
BT_Q_SG_ZJU_Unigene5521	gi|295901419|dbj|BAJ07366.1|	5.00E-29	alpha-tubulin [Taenia taeniaeformis]
BT_Q_SG_ZJU_Unigene5523	gi|239799256|dbj|BAH70558.1|	2.00E-18	ACYPI007065 [Acyrthosiphon pisum]
BT_Q_SG_ZJU_Unigene5526	gi|110761589|ref|XP_393406.3|	7.00E-07	PREDICTED: similar to cutaneous T-cell lymphoma tumor antigen se70-2 [Apis mellifera]
BT_Q_SG_ZJU_Unigene5532	gi|167524819|ref|XP_001746745.1|	8.00E-08	hypothetical protein [Monosiga brevicollis MX1] >gi|163775015|gb|EDQ88641.1| predicted protein [Monosiga brevicollis MX1]
BT_Q_SG_ZJU_Unigene5536	gi|193596733|ref|XP_001950923.1|	3.00E-09	PREDICTED: similar to beclin-1 [Acyrthosiphon pisum]
BT_Q_SG_ZJU_Unigene5538	gi|157103517|ref|XP_001648014.1|	2.00E-24	aldehyde dehydrogenase [Aedes aegypti] >gi|108869413|gb|EAT33638.1| aldehyde dehydrogenase [Aedes aegypti]
BT_Q_SG_ZJU_Unigene5547	gi|91089707|ref|XP_974909.1|	3.00E-18	PREDICTED: similar to AGAP000598-PA [Tribolium castaneum]
BT_Q_SG_ZJU_Unigene5551	gi|158285109|ref|XP_308148.3|	2.00E-13	AGAP007728-PA [Anopheles gambiae str. PEST] >gi|157019834|gb|EAA04703.3| AGAP007728-PA [Anopheles gambiae str. PEST]
BT_Q_SG_ZJU_Unigene5554	gi|119618596|gb|EAW98190.1|	7.00E-31	cytochrome c oxidase subunit VIa polypeptide 1, isoform CRA_a [Homo sapiens] >gi|119618597|gb|EAW98191.1| cytochrome c oxidase subunit VIa polypeptide 1, isoform CRA_a [Homo sapiens]
BT_Q_SG_ZJU_Unigene5574	gi|262303321|gb|ACY44253.1|	7.00E-25	alpha-spectrin [Neogonodactylus oerstedii]
BT_Q_SG_ZJU_Unigene5579	gi|195056055|ref|XP_001994928.1|	5.00E-23	GH17505 [Drosophila grimshawi] >gi|193892691|gb|EDV91557.1| GH17505 [Drosophila grimshawi]
BT_Q_SG_ZJU_Unigene5582	gi|194771252|ref|XP_001967653.1|	2.00E-08	GF19976 [Drosophila ananassae] >gi|190617400|gb|EDV32924.1| GF19976 [Drosophila ananassae]
BT_Q_SG_ZJU_Unigene5591	gi|66522710|ref|XP_393939.2|	5.00E-12	PREDICTED: similar to Cyclin H CG7405-PA [Apis mellifera]
BT_Q_SG_ZJU_Unigene5598	gi|195443422|ref|XP_002069416.1|	4.00E-10	GK18744 [Drosophila willistoni] >gi|194165501|gb|EDW80402.1| GK18744 [Drosophila willistoni]
BT_Q_SG_ZJU_Unigene5600	gi|193664630|ref|XP_001945072.1|	3.00E-19	PREDICTED: similar to GA18135-PA [Acyrthosiphon pisum]
BT_Q_SG_ZJU_Unigene5613	gi|193652448|ref|XP_001948200.1|	3.00E-16	PREDICTED: similar to GA10436-PA [Acyrthosiphon pisum]
BT_Q_SG_ZJU_Unigene5617	gi|189241276|ref|XP_974567.2|	5.00E-10	PREDICTED: similar to CG3983 CG3983-PB [Tribolium castaneum]
BT_Q_SG_ZJU_Unigene5619	gi|110765998|ref|XP_001120366.1|	6.00E-06	PREDICTED: similar to fau CG6544-PB, isoform B isoform 1 [Apis mellifera]
BT_Q_SG_ZJU_Unigene5624	gi|193586911|ref|XP_001950325.1|	1.00E-13	PREDICTED: similar to neurotransmitter gated ion channel [Acyrthosiphon pisum]
BT_Q_SG_ZJU_Unigene5632	gi|195452524|ref|XP_002073391.1|	1.00E-25	GK13178 [Drosophila willistoni] >gi|194169476|gb|EDW84377.1| GK13178 [Drosophila willistoni]
BT_Q_SG_ZJU_Unigene5654	gi|156545740|ref|XP_001605233.1|	3.00E-11	PREDICTED: similar to ENSANGP00000009396 [Nasonia vitripennis]
BT_Q_SG_ZJU_Unigene5655	gi|156554964|ref|XP_001602302.1|	2.00E-16	PREDICTED: similar to ENSANGP00000015396, partial [Nasonia vitripennis]
BT_Q_SG_ZJU_Unigene5658	gi|193715980|ref|XP_001950264.1|	1.00E-10	PREDICTED: similar to trehalase [Acyrthosiphon pisum]
BT_Q_SG_ZJU_Unigene5668	gi|291225416|ref|XP_002732696.1|	5.00E-10	PREDICTED: RAS-associated protein RAB13-like [Saccoglossus kowalevskii]
BT_Q_SG_ZJU_Unigene5670	gi|193627234|ref|XP_001952147.1|	1.00E-26	PREDICTED: similar to NAD-dependent methanol dehydrogenase [Acyrthosiphon pisum]
BT_Q_SG_ZJU_Unigene5677	gi|301632219|ref|XP_002945187.1|	3.00E-14	PREDICTED: 60 kDa chaperonin-like [Xenopus (Silurana) tropicalis]
BT_Q_SG_ZJU_Unigene5683	gi|193678855|ref|XP_001943997.1|	2.00E-11	PREDICTED: similar to mixed-lineage leukemia protein, mll [Acyrthosiphon pisum]
BT_Q_SG_ZJU_Unigene5685	gi|48101875|ref|XP_392719.1|	2.00E-23	PREDICTED: similar to CG30152-PA [Apis mellifera]
BT_Q_SG_ZJU_Unigene5689	gi|197260728|gb|ACH56864.1|	5.00E-16	salivary alpha-amylase [Simulium vittatum]
BT_Q_SG_ZJU_Unigene5691	gi|242018198|ref|XP_002429567.1|	3.00E-06	PHD finger domain, putative [Pediculus humanus corporis] >gi|212514521|gb|EEB16829.1| PHD finger domain, putative [Pediculus humanus corporis]
BT_Q_SG_ZJU_Unigene5696	gi|91079166|ref|XP_967495.1|	3.00E-09	PREDICTED: similar to bap28 [Tribolium castaneum]
BT_Q_SG_ZJU_Unigene5701	gi|199584539|gb|ACH90394.1|	2.00E-23	glutathione-S-transferase [Bemisia tabaci] >gi|199584543|gb|ACH90396.1| glutathione-S-transferase [Bemisia tabaci]
BT_Q_SG_ZJU_Unigene5706	gi|70780262|gb|AAZ08382.1|	1.00E-17	delta-aminolevulinic acid synthetase [Toxoplasma gondii]
BT_Q_SG_ZJU_Unigene5707	gi|195054951|ref|XP_001994386.1|	4.00E-06	GH16607 [Drosophila grimshawi] >gi|193892149|gb|EDV91015.1| GH16607 [Drosophila grimshawi]
BT_Q_SG_ZJU_Unigene5720	gi|156550181|ref|XP_001604681.1|	7.00E-07	PREDICTED: similar to ribosomal protein S2 [Nasonia vitripennis]
BT_Q_SG_ZJU_Unigene5723	gi|193713722|ref|XP_001942734.1|	8.00E-06	PREDICTED: hypothetical protein [Acyrthosiphon pisum]
BT_Q_SG_ZJU_Unigene5725	gi|221129655|ref|XP_002153822.1|	1.00E-08	PREDICTED: similar to DHDPS-like protein [Hydra magnipapillata]
BT_Q_SG_ZJU_Unigene5726	gi|66517558|ref|XP_624836.1|	2.00E-32	PREDICTED: similar to RNA polymerase II 33kD subunit CG7885-PA, isoform A [Apis mellifera]
BT_Q_SG_ZJU_Unigene5733	gi|156358789|ref|XP_001624697.1|	1.00E-13	predicted protein [Nematostella vectensis] >gi|156211492|gb|EDO32597.1| predicted protein [Nematostella vectensis]
BT_Q_SG_ZJU_Unigene5745	gi|195123123|ref|XP_002006059.1|	1.00E-05	GI20823 [Drosophila mojavensis] >gi|193911127|gb|EDW09994.1| GI20823 [Drosophila mojavensis]
BT_Q_SG_ZJU_Unigene5754	gi|149053626|gb|EDM05443.1|	3.00E-20	rCG33492 [Rattus norvegicus]
BT_Q_SG_ZJU_Unigene5768	gi|193639985|ref|XP_001944684.1|	6.00E-14	PREDICTED: similar to CG7927 CG7927-PA [Acyrthosiphon pisum]
BT_Q_SG_ZJU_Unigene5773	gi|157109295|ref|XP_001650609.1|	3.00E-12	ubiquinol-cytochrome c reductase complex core protein [Aedes aegypti] >gi|157109297|ref|XP_001650610.1| ubiquinol-cytochrome c reductase complex core protein [Aedes aegypti] >gi|157109299|ref|XP_001650611.1| ubiquinol-cytochrome c reductase complex core protein [Aedes aegypti] >gi|108879066|gb|EAT43291.1| ubiquinol-cytochrome c reductase complex core protein [Aedes aegypti] >gi|108879067|gb|EAT43…
BT_Q_SG_ZJU_Unigene5775	gi|193662263|ref|XP_001950664.1|	4.00E-10	PREDICTED: similar to Mannose-6-phosphate isomerase (Phosphomannose isomerase) (PMI) (Phosphohexomutase) [Acyrthosiphon pisum]
BT_Q_SG_ZJU_Unigene5776	gi|66499068|ref|XP_394882.2|	2.00E-26	PREDICTED: similar to CG9245-PA, isoform A [Apis mellifera]
BT_Q_SG_ZJU_Unigene5782	gi|296214070|ref|XP_002753551.1|	2.00E-24	PREDICTED: 40S ribosomal protein S18-like [Callithrix jacchus]
BT_Q_SG_ZJU_Unigene5789	gi|158293133|ref|XP_314472.4|	7.00E-23	AGAP010499-PA [Anopheles gambiae str. PEST] >gi|157016812|gb|EAA09898.4| AGAP010499-PA [Anopheles gambiae str. PEST]
BT_Q_SG_ZJU_Unigene5795	gi|158300413|ref|XP_320341.4|	1.00E-23	AGAP012191-PA [Anopheles gambiae str. PEST] >gi|157013147|gb|EAA00134.4| AGAP012191-PA [Anopheles gambiae str. PEST]
BT_Q_SG_ZJU_Unigene5799	gi|291241774|ref|XP_002740786.1|	3.00E-15	PREDICTED: CG10098-like [Saccoglossus kowalevskii]
BT_Q_SG_ZJU_Unigene5806	gi|195394027|ref|XP_002055647.1|	7.00E-10	GJ19475 [Drosophila virilis] >gi|194150157|gb|EDW65848.1| GJ19475 [Drosophila virilis]
BT_Q_SG_ZJU_Unigene5808	gi|118794372|ref|XP_321442.3|	2.00E-29	AGAP001653-PA [Anopheles gambiae str. PEST] >gi|116116265|gb|EAA00921.3| AGAP001653-PA [Anopheles gambiae str. PEST]
BT_Q_SG_ZJU_Unigene5811	gi|158296789|ref|XP_317137.3|	4.00E-06	AGAP008326-PA [Anopheles gambiae str. PEST] >gi|157014880|gb|EAA12425.3| AGAP008326-PA [Anopheles gambiae str. PEST]
BT_Q_SG_ZJU_Unigene5823	gi|110759003|ref|XP_001122061.1|	6.00E-08	PREDICTED: similar to CG8885-PA [Apis mellifera]
BT_Q_SG_ZJU_Unigene5824	gi|109086975|ref|XP_001090361.1|	1.00E-08	PREDICTED: UPF0551 protein C8orf38, mitochondrial [Macaca mulatta]
BT_Q_SG_ZJU_Unigene5826	gi|86198335|ref|NP_079815.2|	3.00E-17	bis(5'-nucleosyl)-tetraphosphatase [asymmetrical] [Mus musculus] >gi|67476788|sp|P56380.3|AP4A_MOUSE RecName: Full=Bis(5'-nucleosyl)-tetraphosphatase [asymmetrical]; AltName: Full=Diadenosine 5',5'''-P1,P4-tetraphosphate asymmetrical hydrolase; Short=Diadenosine tetraphosphatase; Short=Ap4A hydrolase; Short=Ap4Aase; AltName: Full=Nucleoside diphosphate-linked moiety X motif 2; Short=Nudix motif 2…
BT_Q_SG_ZJU_Unigene5833	gi|284506739|dbj|BAI67363.1|	8.00E-19	cryptochrome [Bactrocera cucurbitae]
BT_Q_SG_ZJU_Unigene5846	gi|224552881|gb|ACN54680.1|	6.00E-19	heat shock protein 90 kDa beta member 1 [Scylla paramamosain]
BT_Q_SG_ZJU_Unigene5852	gi|256773186|ref|NP_001157948.1|	6.00E-24	sarco/endoplasmic reticulum calcium ATPase [Bombyx mori] >gi|255661412|gb|ACU25861.1| sarco/endoplasmic reticulum calcium ATPase [Bombyx mori]
BT_Q_SG_ZJU_Unigene5854	gi|17544396|ref|NP_502997.1|	3.00E-17	Methionine AminoPeptidase family member (map-2) [Caenorhabditis elegans] >gi|5832829|emb|CAB55167.1| C. elegans protein Y116A8A.9, confirmed by transcript evidence [Caenorhabditis elegans]
BT_Q_SG_ZJU_Unigene5856	gi|121512030|gb|ABM55466.1|	5.00E-13	ribosomal protein L35 [Xenopsylla cheopis]
BT_Q_SG_ZJU_Unigene5883	gi|115910860|ref|XP_001177628.1|	2.00E-13	PREDICTED: similar to DEAD-box RNA-dependent helicase p68 [Strongylocentrotus purpuratus] >gi|115968720|ref|XP_001178951.1| PREDICTED: similar to DEAD-box RNA-dependent helicase p68 isoform 1 [Strongylocentrotus purpuratus]
BT_Q_SG_ZJU_Unigene5886	gi|193584719|ref|XP_001952537.1|	1.00E-11	PREDICTED: similar to Pseudouridylate synthase 7 homolog [Acyrthosiphon pisum]
BT_Q_SG_ZJU_Unigene5890	gi|156541174|ref|XP_001599321.1|	4.00E-10	PREDICTED: similar to Peptidase, cysteine peptidase active site; Zinc finger, CCHC-type; Peptidase aspartic, catalytic; Polynucleotidyl transferase, Ribonuclease H fold [Nasonia vitripennis]
BT_Q_SG_ZJU_Unigene5899	gi|91093129|ref|XP_968930.1|	8.00E-16	PREDICTED: similar to low molecular weight protein-tyrosine-phosphatase [Tribolium castaneum]
BT_Q_SG_ZJU_Unigene5905	gi|259089631|gb|ACV91671.1|	8.00E-13	AT31783p [Drosophila melanogaster]
BT_Q_SG_ZJU_Unigene5906	gi|66509659|ref|XP_395945.2|	8.00E-16	PREDICTED: similar to CG11164-PA [Apis mellifera]
BT_Q_SG_ZJU_Unigene5919	gi|190663305|gb|ACE81250.1|	5.00E-07	glutathione S-transferase zeta [Tigriopus japonicus]
BT_Q_SG_ZJU_Unigene5920	gi|193643557|ref|XP_001948937.1|	3.00E-24	PREDICTED: similar to endoplasmin [Acyrthosiphon pisum]
BT_Q_SG_ZJU_Unigene5923	gi|7332251|gb|AAF60938.1|	2.00E-11	Hypothetical protein Y9C9A.16 [Caenorhabditis elegans]
BT_Q_SG_ZJU_Unigene5928	gi|193652456|ref|XP_001946503.1|	1.00E-09	PREDICTED: similar to Farnesyltransferase, CAAX box, beta [Acyrthosiphon pisum]
BT_Q_SG_ZJU_Unigene5935	gi|156538589|ref|XP_001607504.1|	1.00E-12	PREDICTED: similar to nad dehydrogenase [Nasonia vitripennis]
BT_Q_SG_ZJU_Unigene5938	gi|91090282|ref|XP_971174.1|	5.00E-15	PREDICTED: similar to nadph cytochrome P450 [Tribolium castaneum]
BT_Q_SG_ZJU_Unigene5944	gi|91078216|ref|XP_969175.1|	8.00E-21	PREDICTED: similar to surfeit 4-like protein [Tribolium castaneum]
BT_Q_SG_ZJU_Unigene5950	gi|45709126|gb|AAH67663.1|	4.00E-07	Zgc:85858 [Danio rerio]
BT_Q_SG_ZJU_Unigene5955	gi|301753993|ref|XP_002912867.1|	5.00E-27	PREDICTED: probable cation-transporting ATPase 13A1-like [Ailuropoda melanoleuca]
BT_Q_SG_ZJU_Unigene5968	gi|156306186|ref|XP_001617560.1|	1.00E-14	hypothetical protein NEMVEDRAFT_v1g225983 [Nematostella vectensis] >gi|156194563|gb|EDO25460.1| predicted protein [Nematostella vectensis]
BT_Q_SG_ZJU_Unigene5973	gi|239789964|dbj|BAH71574.1|	5.00E-11	ACYPI000995 [Acyrthosiphon pisum]
BT_Q_SG_ZJU_Unigene5977	gi|193580091|ref|XP_001944658.1|	7.00E-23	PREDICTED: similar to lethal (2) k05713 CG8256-PD [Acyrthosiphon pisum]
BT_Q_SG_ZJU_Unigene5979	gi|156548141|ref|XP_001606707.1|	2.00E-20	PREDICTED: similar to ENSANGP00000022750 [Nasonia vitripennis]
BT_Q_SG_ZJU_Unigene5984	gi|156554116|ref|XP_001602967.1|	2.00E-24	PREDICTED: similar to protein disulfide isomerase [Nasonia vitripennis]
BT_Q_SG_ZJU_Unigene5990	gi|301630910|ref|XP_002944558.1|	3.00E-14	PREDICTED: dipeptide transport system permease protein dppB-like [Xenopus (Silurana) tropicalis]
BT_Q_SG_ZJU_Unigene6007	gi|156542799|ref|XP_001607402.1|	2.00E-23	PREDICTED: similar to profilin [Nasonia vitripennis]
BT_Q_SG_ZJU_Unigene6010	gi|296317319|ref|NP_001171746.1|	1.00E-13	histone acetyltransferase type B catalytic subunit [Saccoglossus kowalevskii]
BT_Q_SG_ZJU_Unigene6017	gi|1835656|gb|AAC47465.1|	2.00E-06	oligopeptide transporter 1 [Drosophila melanogaster]
BT_Q_SG_ZJU_Unigene6020	gi|91094479|ref|XP_970762.1|	5.00E-26	PREDICTED: similar to cleavage stimulation factor 64-kDa subunit [Tribolium castaneum]
BT_Q_SG_ZJU_Unigene6022	gi|225708580|gb|ACO10136.1|	3.00E-09	Cathepsin B precursor [Osmerus mordax]
BT_Q_SG_ZJU_Unigene6028	gi|221124298|ref|XP_002160876.1|	4.00E-20	PREDICTED: similar to SQuashed Vulva family member (sqv-4) [Hydra magnipapillata]
BT_Q_SG_ZJU_Unigene6033	gi|195037457|ref|XP_001990177.1|	2.00E-25	GH18375 [Drosophila grimshawi] >gi|193894373|gb|EDV93239.1| GH18375 [Drosophila grimshawi]
BT_Q_SG_ZJU_Unigene6038	gi|264667383|gb|ACY71277.1|	2.00E-08	ribosomal protein S12 [Chrysomela tremulae]
BT_Q_SG_ZJU_Unigene6049	gi|193692994|ref|XP_001949960.1|	5.00E-26	PREDICTED: similar to Coatomer protein complex, subunit beta 1 [Acyrthosiphon pisum]
BT_Q_SG_ZJU_Unigene6053	gi|239791844|dbj|BAH72335.1|	1.00E-25	ACYPI008293 [Acyrthosiphon pisum]
BT_Q_SG_ZJU_Unigene6054	gi|195119953|ref|XP_002004493.1|	3.00E-22	GI19964 [Drosophila mojavensis] >gi|193909561|gb|EDW08428.1| GI19964 [Drosophila mojavensis]
BT_Q_SG_ZJU_Unigene6062	gi|170048860|ref|XP_001870810.1|	9.00E-18	cullin [Culex quinquefasciatus] >gi|167870809|gb|EDS34192.1| cullin [Culex quinquefasciatus]
BT_Q_SG_ZJU_Unigene6072	gi|301629758|ref|XP_002944001.1|	4.00E-10	PREDICTED: ABC transporter protein AbcA-like [Xenopus (Silurana) tropicalis]
BT_Q_SG_ZJU_Unigene6078	gi|66535957|ref|XP_624293.1|	2.00E-24	PREDICTED: similar to lethal (2) k05713 CG8256-PC, isoform C [Apis mellifera]
BT_Q_SG_ZJU_Unigene6080	gi|291242821|ref|XP_002741304.1|	2.00E-14	PREDICTED: succinate dehydrogenase-like [Saccoglossus kowalevskii]
BT_Q_SG_ZJU_Unigene6088	gi|110755385|ref|XP_395718.3|	1.00E-24	PREDICTED: similar to Enhancer of bithorax CG32346-PB, isoform B isoform 1 [Apis mellifera]
BT_Q_SG_ZJU_Unigene6095	gi|189234367|ref|XP_974344.2|	1.00E-17	PREDICTED: similar to fibrillin 2 [Tribolium castaneum]
BT_Q_SG_ZJU_Unigene6096	gi|239788326|dbj|BAH70851.1|	1.00E-12	ACYPI007021 [Acyrthosiphon pisum]
BT_Q_SG_ZJU_Unigene6101	gi|195575955|ref|XP_002077842.1|	2.00E-06	GD22860 [Drosophila simulans] >gi|194189851|gb|EDX03427.1| GD22860 [Drosophila simulans]
BT_Q_SG_ZJU_Unigene6102	gi|91093943|ref|XP_967116.1|	3.00E-19	PREDICTED: similar to splicing factor 3b, subunit 5 [Tribolium castaneum]
BT_Q_SG_ZJU_Unigene6103	gi|170048439|ref|XP_001852902.1|	2.00E-11	GLP_748_1200_211 [Culex quinquefasciatus] >gi|167870569|gb|EDS33952.1| GLP_748_1200_211 [Culex quinquefasciatus]
BT_Q_SG_ZJU_Unigene6104	gi|270014227|gb|EFA10675.1|	1.00E-29	kinesin heavy chain [Tribolium castaneum]
BT_Q_SG_ZJU_Unigene6105	gi|264667423|gb|ACY71297.1|	4.00E-20	ribosomal protein L13 [Chrysomela tremulae]
BT_Q_SG_ZJU_Unigene6111	gi|239793557|dbj|BAH72890.1|	5.00E-11	ACYPI006050 [Acyrthosiphon pisum]
BT_Q_SG_ZJU_Unigene6113	gi|91089831|ref|XP_969724.1|	2.00E-10	PREDICTED: similar to formin 1,2/cappuccino [Tribolium castaneum] >gi|270014279|gb|EFA10727.1| cappuccino [Tribolium castaneum]
BT_Q_SG_ZJU_Unigene6128	gi|301629425|ref|XP_002943840.1|	2.00E-08	PREDICTED: ubiquinol oxidase subunit 1-like, partial [Xenopus (Silurana) tropicalis]
BT_Q_SG_ZJU_Unigene6135	gi|187111150|ref|NP_001119676.1|	8.00E-16	phosphoglycerate mutase [Acyrthosiphon pisum]
BT_Q_SG_ZJU_Unigene6138	gi|154419098|ref|XP_001582566.1|	7.00E-12	glycosyl hydrolase [Trichomonas vaginalis G3] >gi|121916802|gb|EAY21580.1| Glycosyl hydrolase family 3 N terminal domain containing protein [Trichomonas vaginalis G3]
BT_Q_SG_ZJU_Unigene6142	gi|193671564|ref|XP_001950687.1|	7.00E-17	PREDICTED: similar to CG8306 CG8306-PA [Acyrthosiphon pisum]
BT_Q_SG_ZJU_Unigene6149	gi|193587201|ref|XP_001947058.1|	3.00E-17	PREDICTED: similar to acyl-CoA oxidase [Acyrthosiphon pisum]
BT_Q_SG_ZJU_Unigene6155	gi|291393949|ref|XP_002713465.1|	1.00E-15	PREDICTED: desmocollin 2-like [Oryctolagus cuniculus]
BT_Q_SG_ZJU_Unigene6166	gi|262400967|gb|ACY66386.1|	1.00E-26	histone H2AV [Scylla paramamosain]
BT_Q_SG_ZJU_Unigene6170	gi|156545998|ref|XP_001607743.1|	8.00E-29	PREDICTED: similar to DNA repair protein xp-e [Nasonia vitripennis]
BT_Q_SG_ZJU_Unigene6180	gi|50745282|ref|XP_420055.1|	5.00E-24	PREDICTED: similar to Methylmalonyl Coenzyme A mutase [Gallus gallus]
BT_Q_SG_ZJU_Unigene6185	gi|48129273|ref|XP_396646.1|	2.00E-19	PREDICTED: similar to Shwachman-Bodian-Diamond syndrome protein [Apis mellifera]
BT_Q_SG_ZJU_Unigene6195	gi|110770638|ref|XP_001123090.1|	4.00E-16	PREDICTED: similar to tRNA phosphotransferase 1 isoform 1 [Apis mellifera]
BT_Q_SG_ZJU_Unigene6196	gi|195429543|ref|XP_002062817.1|	7.00E-07	GK19653 [Drosophila willistoni] >gi|194158902|gb|EDW73803.1| GK19653 [Drosophila willistoni]
BT_Q_SG_ZJU_Unigene6198	gi|118782673|ref|XP_312425.3|	3.00E-20	AGAP002513-PA [Anopheles gambiae str. PEST] >gi|116129679|gb|EAA44922.3| AGAP002513-PA [Anopheles gambiae str. PEST]
BT_Q_SG_ZJU_Unigene6200	gi|195394898|ref|XP_002056076.1|	1.00E-05	GJ10741 [Drosophila virilis] >gi|194142785|gb|EDW59188.1| GJ10741 [Drosophila virilis]
BT_Q_SG_ZJU_Unigene6209	gi|66819998|ref|XP_643654.1|	2.00E-12	Rab GTPase [Dictyostelium discoideum AX4] >gi|74857403|sp|Q553R6.1|RABX_DICDI RecName: Full=Ras-related protein RabX >gi|60471774|gb|EAL69729.1| Rab GTPase [Dictyostelium discoideum AX4]
BT_Q_SG_ZJU_Unigene6217	gi|195972534|emb|CAQ16893.1|	7.00E-10	MAM-containing astacin-like metalloprotease [Limulus polyphemus]
BT_Q_SG_ZJU_Unigene6220	gi|189238118|ref|XP_001814132.1|	7.00E-12	PREDICTED: similar to zinc finger protein 84 [Tribolium castaneum]
BT_Q_SG_ZJU_Unigene6223	gi|91083527|ref|XP_973110.1|	2.00E-25	PREDICTED: similar to AGAP007646-PA [Tribolium castaneum]
BT_Q_SG_ZJU_Unigene6229	gi|301632444|ref|XP_002945295.1|	2.00E-09	PREDICTED: phosphate import ATP-binding protein pstB-like [Xenopus (Silurana) tropicalis]
BT_Q_SG_ZJU_Unigene6235	gi|292623640|ref|XP_002665374.1|	2.00E-11	PREDICTED: polymerase (RNA) III (DNA directed) polypeptide B [Danio rerio]
BT_Q_SG_ZJU_Unigene6236	gi|220679161|emb|CAX14174.1|	9.00E-15	DNA methyltransferase 1 associated protein 1 [Danio rerio]
BT_Q_SG_ZJU_Unigene6241	gi|182890738|gb|AAI65240.1|	4.00E-06	Ranbp9 protein [Danio rerio]
BT_Q_SG_ZJU_Unigene6242	gi|66519549|ref|XP_393737.2|	5.00E-14	PREDICTED: similar to RUN domain containing 1 [Apis mellifera]
BT_Q_SG_ZJU_Unigene6246	gi|91083047|ref|XP_966461.1|	2.00E-13	PREDICTED: similar to anterior pharynx defective 1 CG2855-PA [Tribolium castaneum]
BT_Q_SG_ZJU_Unigene6249	gi|147899336|ref|NP_001079373.1|	1.00E-09	calcium activated nucleotidase 1 [Xenopus laevis] >gi|27370858|gb|AAH41215.1| MGC52693 protein [Xenopus laevis] >gi|57282934|emb|CAG15247.1| apyrase [Xenopus laevis]
BT_Q_SG_ZJU_Unigene6261	gi|198464319|ref|XP_002134750.1|	4.00E-18	GA23623 [Drosophila pseudoobscura pseudoobscura] >gi|198149665|gb|EDY73377.1| GA23623 [Drosophila pseudoobscura pseudoobscura]
BT_Q_SG_ZJU_Unigene6264	gi|110757994|ref|XP_392480.3|	6.00E-28	PREDICTED: similar to Oxysterol binding protein CG6708-PA isoform 1, partial [Apis mellifera]
BT_Q_SG_ZJU_Unigene6269	gi|301631772|ref|XP_002944969.1|	5.00E-06	PREDICTED: monofunctional biosynthetic peptidoglycan transglycosylase-like [Xenopus (Silurana) tropicalis]
BT_Q_SG_ZJU_Unigene6282	gi|77628045|ref|NP_001029317.1|	8.00E-19	elongator complex protein 2 [Rattus norvegicus] >gi|83305835|sp|Q496Z0.1|ELP2_RAT RecName: Full=Elongator complex protein 2; Short=ELP2; AltName: Full=STAT3-interacting protein 1; Short=StIP1; AltName: Full=SHINC-2 >gi|72679582|gb|AAI00662.1| Elongation protein 2 homolog (S. cerevisiae) [Rattus norvegicus] >gi|149017089|gb|EDL76140.1| signal transducer and activator of transcription interacting p…
BT_Q_SG_ZJU_Unigene6296	gi|193617869|ref|XP_001944035.1|	5.00E-13	PREDICTED: similar to CG9149 CG9149-PA [Acyrthosiphon pisum]
BT_Q_SG_ZJU_Unigene6304	gi|241172447|ref|XP_002410754.1|	3.00E-07	zinc finger protein, putative [Ixodes scapularis] >gi|215494970|gb|EEC04611.1| zinc finger protein, putative [Ixodes scapularis]
BT_Q_SG_ZJU_Unigene6308	gi|189237079|ref|XP_968890.2|	2.00E-17	PREDICTED: similar to alpha-1,3-mannosyltransferase [Tribolium castaneum]
BT_Q_SG_ZJU_Unigene6309	gi|156542409|ref|XP_001601196.1|	1.00E-21	PREDICTED: similar to ENSANGP00000023686 [Nasonia vitripennis]
BT_Q_SG_ZJU_Unigene6310	gi|193713621|ref|XP_001946799.1|	3.00E-08	PREDICTED: similar to GA19566-PA [Acyrthosiphon pisum]
BT_Q_SG_ZJU_Unigene6314	gi|187175303|ref|NP_001119668.1|	3.00E-28	ribosomal protein L37A [Acyrthosiphon pisum] >gi|89473752|gb|ABD72688.1| ribosomal protein L37A-like [Acyrthosiphon pisum]
BT_Q_SG_ZJU_Unigene6320	gi|193711453|ref|XP_001950896.1|	6.00E-06	PREDICTED: similar to lola, partial [Acyrthosiphon pisum]
BT_Q_SG_ZJU_Unigene6321	gi|149737367|ref|XP_001490453.1|	3.00E-09	PREDICTED: similar to methylmalonate-semialdehyde dehydrogenase [Equus caballus]
BT_Q_SG_ZJU_Unigene6330	gi|189237234|ref|XP_970515.2|	1.00E-29	PREDICTED: similar to eukaryotic initiation factor 4A [Tribolium castaneum]
BT_Q_SG_ZJU_Unigene6335	gi|301630871|ref|XP_002944539.1|	6.00E-06	PREDICTED: transcriptional regulatory protein ompR-like [Xenopus (Silurana) tropicalis]
BT_Q_SG_ZJU_Unigene6343	gi|156553998|ref|XP_001603365.1|	1.00E-10	PREDICTED: similar to eIF2 alpha subunit [Nasonia vitripennis]
BT_Q_SG_ZJU_Unigene6345	gi|93003154|tpd|FAA00160.1|	1.00E-07	TPA: zinc finger protein [Ciona intestinalis]
BT_Q_SG_ZJU_Unigene6352	gi|193591676|ref|XP_001952114.1|	3.00E-25	PREDICTED: similar to ribosome biogenesis protein bop1 (block of proliferation 1 protein) [Acyrthosiphon pisum]
BT_Q_SG_ZJU_Unigene6369	gi|189240808|ref|XP_001811424.1|	3.00E-14	PREDICTED: similar to fetal alzheimer antigen, falz [Tribolium castaneum]
BT_Q_SG_ZJU_Unigene6370	gi|91091294|ref|XP_970147.1|	3.00E-24	PREDICTED: similar to AGAP001802-PA [Tribolium castaneum]
BT_Q_SG_ZJU_Unigene6371	gi|110751169|ref|XP_392839.3|	2.00E-06	PREDICTED: similar to lethal (2) k08015 CG10228-PA [Apis mellifera]
BT_Q_SG_ZJU_Unigene6373	gi|269996533|gb|ACZ57601.1|	1.00E-08	ENSANGP00000013532-like protein [Nasonia giraulti] >gi|269996535|gb|ACZ57602.1| ENSANGP00000013532-like protein [Nasonia giraulti] >gi|269996537|gb|ACZ57603.1| ENSANGP00000013532-like protein [Nasonia giraulti] >gi|269996539|gb|ACZ57604.1| ENSANGP00000013532-like protein [Nasonia giraulti] >gi|269996541|gb|ACZ57605.1| ENSANGP00000013532-like protein [Nasonia giraulti] >gi|269996543|gb|ACZ57606.1|…
BT_Q_SG_ZJU_Unigene6374	gi|156552426|ref|XP_001600534.1|	2.00E-07	PREDICTED: similar to ENSANGP00000005493 [Nasonia vitripennis]
BT_Q_SG_ZJU_Unigene6375	gi|83658840|gb|ABC40570.1|	6.00E-11	putative antimicrobial knottin protein Btk-2 [Bemisia tabaci]
BT_Q_SG_ZJU_Unigene6377	gi|301757681|ref|XP_002914682.1|	4.00E-07	PREDICTED: villin-like protein-like [Ailuropoda melanoleuca]
BT_Q_SG_ZJU_Unigene6381	gi|110760333|ref|XP_395048.3|	1.00E-17	PREDICTED: similar to GERp95 [Apis mellifera]
BT_Q_SG_ZJU_Unigene6385	gi|193631925|ref|XP_001947236.1|	3.00E-22	PREDICTED: similar to subtilisin-related protease SPC3 [Acyrthosiphon pisum]
BT_Q_SG_ZJU_Unigene6388	gi|170036495|ref|XP_001846099.1|	3.00E-28	AMPK-beta subunit [Culex quinquefasciatus] >gi|167879167|gb|EDS42550.1| AMPK-beta subunit [Culex quinquefasciatus]
BT_Q_SG_ZJU_Unigene6393	gi|66535613|ref|XP_395909.2|	9.00E-26	PREDICTED: similar to transcription factor-like 4 [Apis mellifera]
BT_Q_SG_ZJU_Unigene6403	gi|198423638|ref|XP_002128510.1|	5.00E-16	PREDICTED: similar to Glutamate-rich WD repeat containing 1 [Ciona intestinalis]
BT_Q_SG_ZJU_Unigene6404	gi|52220946|ref|YP_086806.1|	4.00E-11	NADH dehydrogenase subunit 5 [Bemisia tabaci] >gi|51944941|gb|AAU14197.1| NADH dehydrogenase subunit 5 [Bemisia tabaci]
BT_Q_SG_ZJU_Unigene6408	gi|297470442|ref|XP_002683952.1|	1.00E-19	PREDICTED: MGC84259 protein-like [Bos taurus] >gi|296491799|gb|DAA33832.1| MGC84259 protein-like [Bos taurus]
BT_Q_SG_ZJU_Unigene6412	gi|300487873|gb|ACT68012.1|	3.00E-15	cytochrome P450 CYP6CX1v1 [Bemisia tabaci]
BT_Q_SG_ZJU_Unigene6422	gi|194742728|ref|XP_001953853.1|	1.00E-11	GF17974 [Drosophila ananassae] >gi|190626890|gb|EDV42414.1| GF17974 [Drosophila ananassae]
BT_Q_SG_ZJU_Unigene6428	gi|91078198|ref|XP_968342.1|	9.00E-18	PREDICTED: similar to aquaporin [Tribolium castaneum]
BT_Q_SG_ZJU_Unigene6429	gi|195390893|ref|XP_002054102.1|	2.00E-09	GJ22975 [Drosophila virilis] >gi|194152188|gb|EDW67622.1| GJ22975 [Drosophila virilis]
BT_Q_SG_ZJU_Unigene6436	gi|239788752|dbj|BAH71041.1|	1.00E-13	ACYPI007441 [Acyrthosiphon pisum]
BT_Q_SG_ZJU_Unigene6457	gi|110755704|ref|XP_001122454.1|	1.00E-12	PREDICTED: similar to Cysteine-rich protein 1 (Cysteine-rich intestinal protein) (CRIP) [Apis mellifera]
BT_Q_SG_ZJU_Unigene6466	gi|66545506|ref|XP_392689.2|	9.00E-34	PREDICTED: similar to Calreticulin CG9429-PA isoform 1 [Apis mellifera]
BT_Q_SG_ZJU_Unigene6469	gi|156538338|ref|XP_001604472.1|	4.00E-18	PREDICTED: similar to protein phosphatase 1 [Nasonia vitripennis]
BT_Q_SG_ZJU_Unigene6470	gi|221124408|ref|XP_002163947.1|	1.00E-20	PREDICTED: similar to ribosomal protein S2 [Hydra magnipapillata]
BT_Q_SG_ZJU_Unigene6476	gi|239791199|dbj|BAH72099.1|	4.00E-13	ACYPI002719 [Acyrthosiphon pisum]
BT_Q_SG_ZJU_Unigene6479	gi|156536885|ref|XP_001606843.1|	7.00E-28	PREDICTED: similar to phosphoglycerate kinase [Nasonia vitripennis]
BT_Q_SG_ZJU_Unigene6497	gi|289741809|gb|ADD19652.1|	1.00E-07	RNA polymerase C 37 kDa subunit III [Glossina morsitans morsitans]
BT_Q_SG_ZJU_Unigene6498	gi|195442698|ref|XP_002069083.1|	6.00E-19	GK24075 [Drosophila willistoni] >gi|194165168|gb|EDW80069.1| GK24075 [Drosophila willistoni]
BT_Q_SG_ZJU_Unigene6507	gi|105969663|gb|ABF81668.1|	4.00E-08	ribosomal protein S6 [Chaoborus sp. AF-2006]
BT_Q_SG_ZJU_Unigene6511	gi|170070165|ref|XP_001869487.1|	6.00E-08	dihydropteridine reductase [Culex quinquefasciatus] >gi|167866056|gb|EDS29439.1| dihydropteridine reductase [Culex quinquefasciatus]
BT_Q_SG_ZJU_Unigene6512	gi|239791906|dbj|BAH72358.1|	2.00E-09	ACYPI005219 [Acyrthosiphon pisum]
BT_Q_SG_ZJU_Unigene6518	gi|110776820|ref|XP_624980.2|	6.00E-14	PREDICTED: similar to KDEL (Lys-Asp-Glu-Leu) containing 1 [Apis mellifera]
BT_Q_SG_ZJU_Unigene6520	gi|141795905|gb|AAI34991.1|	4.00E-09	Si:dkey-56d12.4 protein [Danio rerio]
BT_Q_SG_ZJU_Unigene6522	gi|195496642|ref|XP_002095779.1|	3.00E-06	GE22590 [Drosophila yakuba] >gi|194181880|gb|EDW95491.1| GE22590 [Drosophila yakuba]
BT_Q_SG_ZJU_Unigene6526	gi|225713082|gb|ACO12387.1|	8.00E-27	Signal peptidase complex subunit 3 [Lepeophtheirus salmonis] >gi|290561441|gb|ADD38121.1| Signal peptidase complex subunit 3 [Lepeophtheirus salmonis]
BT_Q_SG_ZJU_Unigene6529	gi|91087483|ref|XP_967991.1|	9.00E-18	PREDICTED: similar to dehydrogenase E1 and transketolase domain containing 1 [Tribolium castaneum]
BT_Q_SG_ZJU_Unigene6541	gi|156546996|ref|XP_001600316.1|	8.00E-08	PREDICTED: similar to ENSANGP00000015743 [Nasonia vitripennis]
BT_Q_SG_ZJU_Unigene6542	gi|66529639|ref|XP_624926.1|	7.00E-10	PREDICTED: similar to CG10721-PA [Apis mellifera]
BT_Q_SG_ZJU_Unigene6548	gi|46561740|gb|AAT01075.1|	4.00E-29	glyceraldehyde 3-phosphate dehydrogenase [Homalodisca vitripennis]
BT_Q_SG_ZJU_Unigene6550	gi|156553950|ref|XP_001602521.1|	3.00E-11	PREDICTED: similar to IP14914p [Nasonia vitripennis]
BT_Q_SG_ZJU_Unigene6551	gi|61654660|gb|AAX48856.1|	3.00E-15	L23a [Suberites domuncula]
BT_Q_SG_ZJU_Unigene6557	gi|29612581|gb|AAH49478.1|	8.00E-25	Zgc:66168 protein [Danio rerio]
BT_Q_SG_ZJU_Unigene6562	gi|91080327|ref|XP_974524.1|	3.00E-31	PREDICTED: similar to S-phase kinase-associated protein [Tribolium castaneum] >gi|270006399|gb|EFA02847.1| S-phase kinase-associated protein 1 [Tribolium castaneum]
BT_Q_SG_ZJU_Unigene6563	gi|156548456|ref|XP_001605128.1|	2.00E-08	PREDICTED: hypothetical protein [Nasonia vitripennis]
BT_Q_SG_ZJU_Unigene6568	gi|194035431|ref|XP_001928696.1|	3.00E-10	PREDICTED: similar to tRNA guanosine-2-O-methyltransferase TRM11 homolog [Sus scrofa]
BT_Q_SG_ZJU_Unigene6575	gi|167234457|ref|NP_001107844.1|	9.00E-23	eukaryotic translation initiation factor 5 [Tribolium castaneum]
BT_Q_SG_ZJU_Unigene6577	gi|158289324|ref|XP_311074.4|	4.00E-18	AGAP000078-PA [Anopheles gambiae str. PEST] >gi|157019000|gb|EAA06223.4| AGAP000078-PA [Anopheles gambiae str. PEST]
BT_Q_SG_ZJU_Unigene6588	gi|195485854|ref|XP_002091261.1|	1.00E-34	GE13554 [Drosophila yakuba] >gi|194177362|gb|EDW90973.1| GE13554 [Drosophila yakuba]
BT_Q_SG_ZJU_Unigene6591	gi|91084583|ref|XP_974020.1|	2.00E-25	PREDICTED: similar to ARP2/3 complex 21 kDa subunit [Tribolium castaneum]
BT_Q_SG_ZJU_Unigene6594	gi|253314474|ref|NP_001156604.1|	8.00E-16	syntaxin 16 [Acyrthosiphon pisum]
BT_Q_SG_ZJU_Unigene6600	gi|54020904|ref|NP_001005697.1|	6.00E-17	DDB1 and CUL4 associated factor 11 [Xenopus (Silurana) tropicalis] >gi|49670626|gb|AAH75264.1| WD repeat domain 23 [Xenopus (Silurana) tropicalis]
BT_Q_SG_ZJU_Unigene6604	gi|32264609|gb|AAP78751.1|	2.00E-09	Ac1147 [Rattus norvegicus] >gi|32492558|gb|AAP85367.1| Aa1011 [Rattus norvegicus] >gi|32492570|gb|AAP85373.1| Aa1262 [Rattus norvegicus] >gi|33086544|gb|AAP92584.1| Ab2-057 [Rattus norvegicus]
BT_Q_SG_ZJU_Unigene6605	gi|161899171|ref|XP_001712812.1|	1.00E-12	SufB involved in iron sulfur protein biogenesis [Bigelowiella natans] >gi|75756305|gb|ABA27200.1| SufB involved in iron sulfur protein biogenesis [Bigelowiella natans]
BT_Q_SG_ZJU_Unigene6606	gi|110757458|ref|XP_396382.2|	4.00E-14	PREDICTED: similar to CG3071-PA [Apis mellifera]
BT_Q_SG_ZJU_Unigene6615	gi|193647913|ref|XP_001951890.1|	3.00E-14	PREDICTED: similar to DEAD box ATP-dependent RNA helicase [Acyrthosiphon pisum]
BT_Q_SG_ZJU_Unigene6620	gi|292630134|ref|XP_002667743.1|	7.00E-10	PREDICTED: predicted protein-like [Danio rerio]
BT_Q_SG_ZJU_Unigene6625	gi|91095139|ref|XP_973052.1|	2.00E-19	PREDICTED: similar to methyltransferase 10 domain containing [Tribolium castaneum]
BT_Q_SG_ZJU_Unigene6631	gi|156542971|ref|XP_001602606.1|	8.00E-25	PREDICTED: similar to wd-repeat protein [Nasonia vitripennis]
BT_Q_SG_ZJU_Unigene6635	gi|112984002|ref|NP_001037414.1|	7.00E-23	asparagine synthetase [Bombyx mori] >gi|85062656|gb|ABC69171.1| asparagine synthetase [Bombyx mori]
BT_Q_SG_ZJU_Unigene6654	gi|91081359|ref|XP_971395.1|	4.00E-24	PREDICTED: similar to CG7830 CG7830-PA [Tribolium castaneum]
BT_Q_SG_ZJU_Unigene6659	gi|156545980|ref|XP_001607273.1|	3.00E-11	PREDICTED: similar to Bm44 [Nasonia vitripennis]
BT_Q_SG_ZJU_Unigene6675	gi|193657413|ref|XP_001951584.1|	1.00E-30	PREDICTED: similar to AGAP000832-PA [Acyrthosiphon pisum]
BT_Q_SG_ZJU_Unigene6677	gi|110756139|ref|XP_395050.2|	6.00E-08	PREDICTED: similar to CG6133-PA [Apis mellifera]
BT_Q_SG_ZJU_Unigene6683	gi|195116945|ref|XP_002003011.1|	2.00E-21	GI24716 [Drosophila mojavensis] >gi|193913586|gb|EDW12453.1| GI24716 [Drosophila mojavensis]
BT_Q_SG_ZJU_Unigene6688	gi|170037222|ref|XP_001846458.1|	8.00E-30	chloride channel protein 3 [Culex quinquefasciatus] >gi|167880292|gb|EDS43675.1| chloride channel protein 3 [Culex quinquefasciatus]
BT_Q_SG_ZJU_Unigene6695	gi|301782731|ref|XP_002926782.1|	3.00E-31	PREDICTED: serine/threonine-protein phosphatase 2A 56 kDa regulatory subunit gamma isoform-like isoform 2 [Ailuropoda melanoleuca]
BT_Q_SG_ZJU_Unigene6698	gi|281202576|gb|EFA76778.1|	4.00E-16	regulator of chromosome condensation domain-containing protein [Polysphondylium pallidum PN500]
BT_Q_SG_ZJU_Unigene6699	gi|110762938|ref|XP_394028.3|	6.00E-16	PREDICTED: similar to CG30157-PA [Apis mellifera]
BT_Q_SG_ZJU_Unigene6704	gi|221124408|ref|XP_002163947.1|	7.00E-12	PREDICTED: similar to ribosomal protein S2 [Hydra magnipapillata]
BT_Q_SG_ZJU_Unigene6715	gi|156536893|ref|XP_001607092.1|	1.00E-18	PREDICTED: similar to IP03424p [Nasonia vitripennis]
BT_Q_SG_ZJU_Unigene6725	gi|156552414|ref|XP_001600355.1|	2.00E-23	PREDICTED: similar to ENSANGP00000006836 [Nasonia vitripennis]
BT_Q_SG_ZJU_Unigene6726	gi|195108155|ref|XP_001998658.1|	8.00E-24	GI24092 [Drosophila mojavensis] >gi|193915252|gb|EDW14119.1| GI24092 [Drosophila mojavensis]
BT_Q_SG_ZJU_Unigene6734	gi|66524926|ref|XP_393212.2|	2.00E-15	PREDICTED: similar to hu li tai shao CG9325-PB, isoform B [Apis mellifera]
BT_Q_SG_ZJU_Unigene6741	gi|189236380|ref|XP_969324.2|	5.00E-23	PREDICTED: similar to IP3K2 CG34359-PC [Tribolium castaneum]
BT_Q_SG_ZJU_Unigene6754	gi|66552353|ref|XP_625204.1|	2.00E-18	PREDICTED: similar to CCR4-NOT transcription complex subunit 2 (CCR4-associated factor 2) [Apis mellifera]
BT_Q_SG_ZJU_Unigene6764	gi|301789295|ref|XP_002930069.1|	2.00E-36	PREDICTED: casein kinase II subunit beta-like isoform 1 [Ailuropoda melanoleuca]
BT_Q_SG_ZJU_Unigene6769	gi|239789357|dbj|BAH71308.1|	3.00E-26	ACYPI001601 [Acyrthosiphon pisum]
BT_Q_SG_ZJU_Unigene6771	gi|194758315|ref|XP_001961407.1|	2.00E-12	GF14946 [Drosophila ananassae] >gi|190615104|gb|EDV30628.1| GF14946 [Drosophila ananassae]
BT_Q_SG_ZJU_Unigene6778	gi|91092970|ref|XP_967107.1|	2.00E-07	PREDICTED: similar to GA15915-PA [Tribolium castaneum]
BT_Q_SG_ZJU_Unigene6792	gi|289742121|gb|ADD19808.1|	2.00E-19	ribosomal protein S15Aa [Glossina morsitans morsitans]
BT_Q_SG_ZJU_Unigene6796	gi|91088023|ref|XP_974181.1|	1.00E-26	PREDICTED: similar to glyceraldehyde 3-phosphate dehydrogenase [Tribolium castaneum]
BT_Q_SG_ZJU_Unigene6804	gi|162507|gb|AAA30323.1|	1.00E-12	trypanothione reductase [Crithidia fasciculata]
BT_Q_SG_ZJU_Unigene6809	gi|156552085|ref|XP_001604861.1|	7.00E-18	PREDICTED: similar to GA17686-PA [Nasonia vitripennis]
BT_Q_SG_ZJU_Unigene6810	gi|281202358|gb|EFA76563.1|	2.00E-10	3-hydroxyisobutyrate dehydrogenase [Polysphondylium pallidum PN500]
BT_Q_SG_ZJU_Unigene6811	gi|195502018|ref|XP_002098041.1|	4.00E-06	GE24156 [Drosophila yakuba] >gi|194184142|gb|EDW97753.1| GE24156 [Drosophila yakuba]
BT_Q_SG_ZJU_Unigene6813	gi|112983802|ref|NP_001037299.1|	9.00E-23	Mn superoxide dismutase [Bombyx mori] >gi|52421187|dbj|BAD51413.1| Mn superoxide dismutase [Bombyx mori] >gi|58429979|gb|AAW78358.1| Mn superoxide dismutase [Bombyx mori]
BT_Q_SG_ZJU_Unigene6822	gi|193657359|ref|XP_001948582.1|	5.00E-24	PREDICTED: similar to fucosidase, alpha-L-1, tissue [Acyrthosiphon pisum]
BT_Q_SG_ZJU_Unigene6823	gi|33089106|gb|AAP93582.1|	9.00E-18	Mn superoxide dismutase [Apis mellifera ligustica]
BT_Q_SG_ZJU_Unigene6834	gi|221115690|ref|XP_002155514.1|	1.00E-14	PREDICTED: similar to GK25017 [Hydra magnipapillata]
BT_Q_SG_ZJU_Unigene6836	gi|193624960|ref|XP_001944360.1|	1.00E-13	PREDICTED: similar to DJ-1 [Acyrthosiphon pisum]
BT_Q_SG_ZJU_Unigene6837	gi|11466215|ref|NP_066538.1|	3.00E-12	NADH dehydrogenase subunit 7 [Naegleria gruberi] >gi|10444250|gb|AAG17816.1|AF288092_41 NADH dehydrogenase subunit 7 [Naegleria gruberi]
BT_Q_SG_ZJU_Unigene6838	gi|193589606|ref|XP_001947667.1|	1.00E-10	PREDICTED: similar to LD22885p [Acyrthosiphon pisum]
BT_Q_SG_ZJU_Unigene6842	gi|158299741|ref|XP_319783.4|	6.00E-17	AGAP009032-PA [Anopheles gambiae str. PEST] >gi|157013663|gb|EAA14766.4| AGAP009032-PA [Anopheles gambiae str. PEST]
BT_Q_SG_ZJU_Unigene6853	gi|193641030|ref|XP_001951087.1|	5.00E-10	PREDICTED: similar to CG1572 CG1572-PA [Acyrthosiphon pisum]
BT_Q_SG_ZJU_Unigene6861	gi|193652640|ref|XP_001943100.1|	6.00E-28	PREDICTED: similar to ergic53 CG6822-PA [Acyrthosiphon pisum]
BT_Q_SG_ZJU_Unigene6865	gi|66554156|ref|XP_625078.1|	1.00E-15	PREDICTED: similar to ATP synthase gamma chain, mitochondrial precursor [Apis mellifera]
BT_Q_SG_ZJU_Unigene6868	gi|170064664|ref|XP_001867620.1|	9.00E-15	signal peptidase complex subunit 3 [Culex quinquefasciatus] >gi|170071966|ref|XP_001870059.1| signal peptidase complex subunit 3 [Culex quinquefasciatus] >gi|167868055|gb|EDS31438.1| signal peptidase complex subunit 3 [Culex quinquefasciatus] >gi|167881969|gb|EDS45352.1| signal peptidase complex subunit 3 [Culex quinquefasciatus]
BT_Q_SG_ZJU_Unigene6870	gi|66519267|ref|XP_625217.1|	3.00E-10	PREDICTED: similar to 26S proteasome non-ATPase regulatory subunit 8 (26S proteasome regulatory subunit S14) (p31) [Apis mellifera]
BT_Q_SG_ZJU_Unigene6871	gi|52220946|ref|YP_086806.1|	6.00E-12	NADH dehydrogenase subunit 5 [Bemisia tabaci] >gi|51944941|gb|AAU14197.1| NADH dehydrogenase subunit 5 [Bemisia tabaci]
BT_Q_SG_ZJU_Unigene6877	gi|193716016|ref|XP_001951334.1|	2.00E-07	PREDICTED: similar to protease, reverse transcriptase and RNase H [Acyrthosiphon pisum]
BT_Q_SG_ZJU_Unigene6879	gi|19921528|ref|NP_609948.1|	3.00E-27	Asparaginyl-tRNA synthetase [Drosophila melanogaster] >gi|5901824|gb|AAD55420.1|AF181634_1 BcDNA.GH06451 [Drosophila melanogaster] >gi|7298549|gb|AAF53768.1| Asparaginyl-tRNA synthetase [Drosophila melanogaster] >gi|220943736|gb|ACL84411.1| Aats-asn-PA [synthetic construct] >gi|220953642|gb|ACL89364.1| Aats-asn-PA [synthetic construct]
BT_Q_SG_ZJU_Unigene6890	gi|195120614|ref|XP_002004819.1|	3.00E-06	GI20125 [Drosophila mojavensis] >gi|193909887|gb|EDW08754.1| GI20125 [Drosophila mojavensis]
BT_Q_SG_ZJU_Unigene6891	gi|221124436|ref|XP_002164623.1|	1.00E-11	PREDICTED: hypothetical protein [Hydra magnipapillata]
BT_Q_SG_ZJU_Unigene6900	gi|193657097|ref|XP_001951445.1|	7.00E-15	PREDICTED: similar to GA15333-PA [Acyrthosiphon pisum]
BT_Q_SG_ZJU_Unigene6901	gi|157135164|ref|XP_001656552.1|	7.00E-13	cyclin h [Aedes aegypti] >gi|157135166|ref|XP_001656553.1| cyclin h [Aedes aegypti] >gi|157135168|ref|XP_001656554.1| cyclin h [Aedes aegypti] >gi|157135170|ref|XP_001656555.1| cyclin h [Aedes aegypti] >gi|108870282|gb|EAT34507.1| cyclin h [Aedes aegypti] >gi|108870283|gb|EAT34508.1| cyclin h [Aedes aegypti] >gi|108870284|gb|EAT34509.1| cyclin h [Aedes aegypti] >gi|108870285|gb|EAT34510.1| cyclin…
BT_Q_SG_ZJU_Unigene6904	gi|297693554|ref|XP_002824081.1|	2.00E-35	PREDICTED: LOW QUALITY PROTEIN: tubulin alpha-3C/D chain-like [Pongo abelii]
BT_Q_SG_ZJU_Unigene6915	gi|156393394|ref|XP_001636313.1|	8.00E-08	predicted protein [Nematostella vectensis] >gi|156223415|gb|EDO44250.1| predicted protein [Nematostella vectensis]
BT_Q_SG_ZJU_Unigene6923	gi|91078880|ref|XP_972914.1|	2.00E-10	PREDICTED: similar to THUMP domain-containing protein 1 [Tribolium castaneum]
BT_Q_SG_ZJU_Unigene6924	gi|91090664|ref|XP_974342.1|	3.00E-11	PREDICTED: similar to GA11261-PA [Tribolium castaneum]
BT_Q_SG_ZJU_Unigene6934	gi|239948350|ref|ZP_04700103.1|	1.00E-18	chaperonin GroL [Rickettsia endosymbiont of Ixodes scapularis] >gi|239922626|gb|EER22650.1| chaperonin GroL [Rickettsia endosymbiont of Ixodes scapularis]
BT_Q_SG_ZJU_Unigene6936	gi|221124466|ref|XP_002165533.1|	1.00E-06	PREDICTED: similar to dihydrolipoamide S-succinyltransferase (E2 component of 2-oxo-glutarate complex) [Hydra magnipapillata]
BT_Q_SG_ZJU_Unigene6941	gi|195454007|ref|XP_002074043.1|	2.00E-08	GK14429 [Drosophila willistoni] >gi|194170128|gb|EDW85029.1| GK14429 [Drosophila willistoni]
BT_Q_SG_ZJU_Unigene6947	gi|189233711|ref|XP_968604.2|	8.00E-19	PREDICTED: similar to CG18304 CG18304-PA [Tribolium castaneum]
BT_Q_SG_ZJU_Unigene6960	gi|2353183|gb|AAB69390.1|	7.00E-15	CtrA [Dictyostelium discoideum]
BT_Q_SG_ZJU_Unigene6968	gi|241116892|ref|XP_002401659.1|	2.00E-08	conserved hypothetical protein [Ixodes scapularis] >gi|215493203|gb|EEC02844.1| conserved hypothetical protein [Ixodes scapularis]
BT_Q_SG_ZJU_Unigene6970	gi|281361102|ref|NP_001162795.1|	7.00E-28	giant fibre A, isoform E [Drosophila melanogaster] >gi|272506168|gb|ACZ95329.1| giant fibre A, isoform E [Drosophila melanogaster]
BT_Q_SG_ZJU_Unigene6977	gi|193636713|ref|XP_001949730.1|	6.00E-17	PREDICTED: similar to cortactin [Acyrthosiphon pisum]
BT_Q_SG_ZJU_Unigene6991	gi|91085437|ref|XP_968834.1|	3.00E-09	PREDICTED: similar to early embryogenesis protein zyg-11 like, ZYGote defective : embryonic lethal ZYG-11 (90.8 kD) (zyg-11) [Tribolium castaneum]
BT_Q_SG_ZJU_Unigene6992	gi|110760633|ref|XP_001120134.1|	2.00E-14	PREDICTED: similar to CG6179-PA [Apis mellifera]
BT_Q_SG_ZJU_Unigene7002	gi|91089633|ref|XP_973579.1|	4.00E-15	PREDICTED: similar to receptor for activated protein kinase C-like [Tribolium castaneum]
BT_Q_SG_ZJU_Unigene7003	gi|239789841|dbj|BAH71519.1|	1.00E-07	ACYPI007195 [Acyrthosiphon pisum]
BT_Q_SG_ZJU_Unigene7015	gi|48108726|ref|XP_393098.1|	9.00E-07	PREDICTED: similar to CG13868-PA [Apis mellifera]
BT_Q_SG_ZJU_Unigene7017	gi|193683329|ref|XP_001949000.1|	1.00E-18	PREDICTED: similar to Protein ADRM1 homolog (p42E) [Acyrthosiphon pisum]
BT_Q_SG_ZJU_Unigene7018	gi|110759005|ref|XP_393491.3|	4.00E-07	PREDICTED: similar to CG11148-PA, isoform A isoform 1 [Apis mellifera]
BT_Q_SG_ZJU_Unigene7022	gi|91087021|ref|XP_974228.1|	5.00E-30	PREDICTED: similar to peptidyl-prolyl cis-trans isomerase [Tribolium castaneum]
BT_Q_SG_ZJU_Unigene7030	gi|239789492|dbj|BAH71368.1|	2.00E-11	ACYPI006238 [Acyrthosiphon pisum]
BT_Q_SG_ZJU_Unigene7031	gi|156540734|ref|XP_001599525.1|	3.00E-31	PREDICTED: similar to CG8542-PA [Nasonia vitripennis]
BT_Q_SG_ZJU_Unigene7034	gi|66513683|ref|XP_394878.2|	1.00E-09	PREDICTED: similar to CG2875-PB, isoform B [Apis mellifera]
BT_Q_SG_ZJU_Unigene7038	gi|109497962|ref|XP_001065345.1|	6.00E-17	PREDICTED: ribosomal protein L23a-like [Rattus norvegicus] >gi|293341371|ref|XP_002724918.1| PREDICTED: ribosomal protein L23a-like [Rattus norvegicus]
BT_Q_SG_ZJU_Unigene7055	gi|290994380|ref|XP_002679810.1|	3.00E-21	60S ribosomal protein L9 [Naegleria gruberi] >gi|284093428|gb|EFC47066.1| 60S ribosomal protein L9 [Naegleria gruberi]
BT_Q_SG_ZJU_Unigene7060	gi|126314283|ref|XP_001373422.1|	5.00E-13	PREDICTED: similar to ubiquitin [Monodelphis domestica]
BT_Q_SG_ZJU_Unigene7065	gi|149409041|ref|XP_001507225.1|	9.00E-10	PREDICTED: similar to RP1-20N2.5 [Ornithorhynchus anatinus]
BT_Q_SG_ZJU_Unigene7068	gi|197245406|ref|NP_001127797.1|	1.00E-15	translocase of inner mitochondrial membrane 50 homolog [Nasonia vitripennis]
BT_Q_SG_ZJU_Unigene7069	gi|221126341|ref|XP_002166321.1|	3.00E-13	PREDICTED: similar to Nicotinamide Nucleotide Transhydrogenase family member (nnt-1) [Hydra magnipapillata]
BT_Q_SG_ZJU_Unigene7073	gi|195114340|ref|XP_002001725.1|	2.00E-16	GI17007 [Drosophila mojavensis] >gi|193912300|gb|EDW11167.1| GI17007 [Drosophila mojavensis]
BT_Q_SG_ZJU_Unigene7074	gi|156537550|ref|XP_001607578.1|	5.00E-13	PREDICTED: similar to LOC100049755 protein [Nasonia vitripennis]
BT_Q_SG_ZJU_Unigene7095	gi|110776388|ref|XP_001122442.1|	3.00E-26	PREDICTED: hypothetical protein [Apis mellifera]
BT_Q_SG_ZJU_Unigene7100	gi|120538253|gb|AAI29585.1|	7.00E-10	LOC100036881 protein [Xenopus laevis]
BT_Q_SG_ZJU_Unigene7109	gi|239799267|dbj|BAH70563.1|	3.00E-13	ACYPI005854 [Acyrthosiphon pisum]
BT_Q_SG_ZJU_Unigene7116	gi|54289289|gb|AAV31928.1|	3.00E-09	vitellogenin C [Ochlerotatus atropalpus]
BT_Q_SG_ZJU_Unigene7120	gi|156543060|ref|XP_001604662.1|	2.00E-21	PREDICTED: similar to alpha-glucosidase [Nasonia vitripennis]
BT_Q_SG_ZJU_Unigene7125	gi|193641068|ref|XP_001945783.1|	3.00E-28	PREDICTED: similar to spinster CG8428-PD [Acyrthosiphon pisum]
BT_Q_SG_ZJU_Unigene7128	gi|91094819|ref|XP_970889.1|	1.00E-26	PREDICTED: similar to GA14966-PA [Tribolium castaneum]
BT_Q_SG_ZJU_Unigene7132	gi|66512450|ref|XP_396261.2|	2.00E-09	PREDICTED: similar to CG14516-PA, isoform A isoform 1 [Apis mellifera]
BT_Q_SG_ZJU_Unigene7133	gi|301631597|ref|XP_002944884.1|	4.00E-16	PREDICTED: ATP-dependent protease La-like, partial [Xenopus (Silurana) tropicalis]
BT_Q_SG_ZJU_Unigene7135	gi|241563450|ref|XP_002401709.1|	2.00E-10	kynurenine aminotransferase, putative [Ixodes scapularis] >gi|215501901|gb|EEC11395.1| kynurenine aminotransferase, putative [Ixodes scapularis]
BT_Q_SG_ZJU_Unigene7138	gi|291231647|ref|XP_002735775.1|	6.00E-38	PREDICTED: chromatin assembly factor 1 subunit-like [Saccoglossus kowalevskii]
BT_Q_SG_ZJU_Unigene7140	gi|156552012|ref|XP_001603429.1|	3.00E-25	PREDICTED: similar to Hsc70/Hsp90-organizing protein HOP [Nasonia vitripennis]
BT_Q_SG_ZJU_Unigene7143	gi|91086195|ref|XP_971475.1|	3.00E-32	PREDICTED: similar to protein transport protein sec23 [Tribolium castaneum]
BT_Q_SG_ZJU_Unigene7146	gi|21730329|pdb|1H6Z|A	3.00E-17	Chain A, 3.0 A Resolution Crystal Structure Of Glycosomal Pyruvate Phosphate Dikinase From Trypanosoma Brucei >gi|282403609|pdb|2X0S|A Chain A, 3.0 A Resolution Crystal Structure Of Glycosomal Pyruvate Phosphate Dikinase From Trypanosoma Brucei >gi|14583259|gb|AAC39128.2| pyruvate phosphate dikinase [Trypanosoma brucei]
BT_Q_SG_ZJU_Unigene7152	gi|195453362|ref|XP_002073755.1|	4.00E-21	GK12972 [Drosophila willistoni] >gi|194169840|gb|EDW84741.1| GK12972 [Drosophila willistoni]
BT_Q_SG_ZJU_Unigene7160	gi|195477202|ref|XP_002100129.1|	4.00E-09	EG:EG0007.9 [Drosophila yakuba] >gi|194187653|gb|EDX01237.1| EG:EG0007.9 [Drosophila yakuba]
BT_Q_SG_ZJU_Unigene7163	gi|189234428|ref|XP_001816488.1|	2.00E-15	PREDICTED: similar to coatomer subunit beta [Tribolium castaneum]
BT_Q_SG_ZJU_Unigene7164	gi|156542793|ref|XP_001605959.1|	2.00E-20	PREDICTED: similar to 26S proteasome regulatory subunit S3 [Nasonia vitripennis]
BT_Q_SG_ZJU_Unigene7169	gi|193631871|ref|XP_001944418.1|	1.00E-19	PREDICTED: similar to CG6006 CG6006-PC [Acyrthosiphon pisum]
BT_Q_SG_ZJU_Unigene7172	gi|91086955|ref|XP_972968.1|	4.00E-21	PREDICTED: similar to leukotriene a-4 hydrolase [Tribolium castaneum] >gi|270011076|gb|EFA07524.1| aminopeptidase-like protein [Tribolium castaneum]
BT_Q_SG_ZJU_Unigene7177	gi|170049370|ref|XP_001855817.1|	2.00E-20	mannose-1-phosphate guanyltransferase [Culex quinquefasciatus] >gi|167871239|gb|EDS34622.1| mannose-1-phosphate guanyltransferase [Culex quinquefasciatus]
BT_Q_SG_ZJU_Unigene7181	gi|66501010|ref|XP_392587.2|	2.00E-30	PREDICTED: similar to alien CG9556-PB, isoform B isoform 1 [Apis mellifera]
BT_Q_SG_ZJU_Unigene7190	gi|62241290|dbj|BAD93613.1|	2.00E-21	protein disulfide-isomerase like protein ERp57 [Bombyx mori]
BT_Q_SG_ZJU_Unigene7193	gi|66523748|ref|XP_624861.1|	2.00E-21	PREDICTED: similar to N-myristoyltransferase 1 [Apis mellifera]
BT_Q_SG_ZJU_Unigene7210	gi|195485110|ref|XP_002090954.1|	4.00E-17	GE13396 [Drosophila yakuba] >gi|194177055|gb|EDW90666.1| GE13396 [Drosophila yakuba]
BT_Q_SG_ZJU_Unigene7213	gi|110761676|ref|XP_395787.3|	3.00E-21	PREDICTED: similar to T16G1.9 [Apis mellifera]
BT_Q_SG_ZJU_Unigene7223	gi|91094895|ref|XP_973250.1|	2.00E-07	PREDICTED: similar to CG9967 CG9967-PA [Tribolium castaneum]
BT_Q_SG_ZJU_Unigene7224	gi|189235276|ref|XP_973489.2|	8.00E-11	PREDICTED: similar to mmr1/hsr1 GTP binding protein [Tribolium castaneum]
BT_Q_SG_ZJU_Unigene7226	gi|90080596|dbj|BAE89779.1|	5.00E-08	unnamed protein product [Macaca fascicularis]
BT_Q_SG_ZJU_Unigene7243	gi|91081785|ref|XP_973657.1|	2.00E-22	PREDICTED: similar to mlo2 [Tribolium castaneum]
BT_Q_SG_ZJU_Unigene7255	gi|193613262|ref|XP_001952282.1|	1.00E-23	PREDICTED: similar to suppressor of ty [Acyrthosiphon pisum]
BT_Q_SG_ZJU_Unigene7283	gi|91088997|ref|XP_967529.1|	2.00E-07	PREDICTED: similar to Cytochrome c oxidase copper chaperone [Tribolium castaneum]
BT_Q_SG_ZJU_Unigene7287	gi|170050841|ref|XP_001861493.1|	8.00E-30	leukotriene A-4 hydrolase [Culex quinquefasciatus] >gi|167872295|gb|EDS35678.1| leukotriene A-4 hydrolase [Culex quinquefasciatus]
BT_Q_SG_ZJU_Unigene7289	gi|242117902|ref|NP_001155983.1|	9.00E-07	odorant-binding protein 11 [Acyrthosiphon pisum] >gi|240247183|emb|CAX63068.1| odorant-binding protein 11 [Acyrthosiphon pisum]
BT_Q_SG_ZJU_Unigene7290	gi|301628951|ref|XP_002943612.1|	1.00E-16	PREDICTED: 50S ribosomal protein L5-like [Xenopus (Silurana) tropicalis]
BT_Q_SG_ZJU_Unigene7293	gi|193706842|ref|XP_001944709.1|	6.00E-08	PREDICTED: similar to CREB 8 protein [Acyrthosiphon pisum]
BT_Q_SG_ZJU_Unigene7299	gi|193587085|ref|XP_001947872.1|	4.00E-13	PREDICTED: similar to helicase [Acyrthosiphon pisum]
BT_Q_SG_ZJU_Unigene7314	gi|221458995|ref|NP_001138105.1|	5.00E-27	CG6364, isoform B [Drosophila melanogaster] >gi|220903190|gb|ACL83561.1| CG6364, isoform B [Drosophila melanogaster]
BT_Q_SG_ZJU_Unigene7315	gi|91086209|ref|XP_971922.1|	5.00E-31	PREDICTED: similar to Sel1l protein [Tribolium castaneum]
BT_Q_SG_ZJU_Unigene7330	gi|193664424|ref|XP_001950126.1|	2.00E-23	PREDICTED: similar to solute carrier family 35 member B1 [Acyrthosiphon pisum]
BT_Q_SG_ZJU_Unigene7331	gi|66499429|ref|XP_392111.2|	2.00E-13	PREDICTED: similar to CG12262-PA [Apis mellifera]
BT_Q_SG_ZJU_Unigene7332	gi|156543561|ref|XP_001603514.1|	3.00E-27	PREDICTED: similar to CG10682-PA [Nasonia vitripennis]
BT_Q_SG_ZJU_Unigene7344	gi|148228965|ref|NP_001088679.1|	6.00E-20	exosome component 4 [Xenopus laevis] >gi|56270437|gb|AAH87307.1| LOC495942 protein [Xenopus laevis]
BT_Q_SG_ZJU_Unigene7346	gi|221112522|ref|XP_002165342.1|	2.00E-10	PREDICTED: similar to metalloproteinase 2, partial [Hydra magnipapillata]
BT_Q_SG_ZJU_Unigene7353	gi|189233838|ref|XP_001808952.1|	2.00E-23	PREDICTED: similar to sodium/hydrogen exchanger 7, 9 (nhe7, nhe9) [Tribolium castaneum]
BT_Q_SG_ZJU_Unigene7356	gi|301632088|ref|XP_002945123.1|	1.00E-13	PREDICTED: copia protein-like [Xenopus (Silurana) tropicalis]
BT_Q_SG_ZJU_Unigene7358	gi|156538068|ref|XP_001607498.1|	2.00E-31	PREDICTED: similar to ENSANGP00000022464 [Nasonia vitripennis]
BT_Q_SG_ZJU_Unigene7359	gi|157112032|ref|XP_001657383.1|	5.00E-22	coatomer [Aedes aegypti] >gi|108878214|gb|EAT42439.1| coatomer [Aedes aegypti]
BT_Q_SG_ZJU_Unigene7360	gi|66508222|ref|XP_623854.1|	3.00E-06	PREDICTED: similar to CG5484-PC, isoform C [Apis mellifera]
BT_Q_SG_ZJU_Unigene7361	gi|121543851|gb|ABM55590.1|	4.00E-15	nucleoplasmin isoform 1-like protein [Maconellicoccus hirsutus]
BT_Q_SG_ZJU_Unigene7379	gi|78714404|gb|ABB51129.1|	4.00E-13	cytochrome p450 family 4 [Brontispa longissima]
BT_Q_SG_ZJU_Unigene7381	gi|156549292|ref|XP_001600155.1|	2.00E-20	PREDICTED: similar to LOC398480 protein [Nasonia vitripennis]
BT_Q_SG_ZJU_Unigene7386	gi|156541044|ref|XP_001603420.1|	3.00E-34	PREDICTED: similar to sodium bicarbonate cotransporter [Nasonia vitripennis]
BT_Q_SG_ZJU_Unigene7393	gi|158285109|ref|XP_308148.3|	6.00E-16	AGAP007728-PA [Anopheles gambiae str. PEST] >gi|157019834|gb|EAA04703.3| AGAP007728-PA [Anopheles gambiae str. PEST]
BT_Q_SG_ZJU_Unigene7407	gi|91088621|ref|XP_967480.1|	3.00E-21	PREDICTED: similar to voltage-dependent anion-selective channel isoform 1 [Tribolium castaneum]
BT_Q_SG_ZJU_Unigene7410	gi|118782673|ref|XP_312425.3|	3.00E-27	AGAP002513-PA [Anopheles gambiae str. PEST] >gi|116129679|gb|EAA44922.3| AGAP002513-PA [Anopheles gambiae str. PEST]
BT_Q_SG_ZJU_Unigene7420	gi|195049154|ref|XP_001992662.1|	2.00E-34	GH24087 [Drosophila grimshawi] >gi|193893503|gb|EDV92369.1| GH24087 [Drosophila grimshawi]
BT_Q_SG_ZJU_Unigene7424	gi|156549535|ref|XP_001602657.1|	1.00E-15	PREDICTED: similar to GA19430-PA [Nasonia vitripennis]
BT_Q_SG_ZJU_Unigene7425	gi|156544668|ref|XP_001605143.1|	9.00E-13	PREDICTED: similar to CG15863-PA [Nasonia vitripennis]
BT_Q_SG_ZJU_Unigene7441	gi|156545796|ref|XP_001605798.1|	3.00E-31	PREDICTED: similar to ENSANGP00000012220 [Nasonia vitripennis]
BT_Q_SG_ZJU_Unigene7442	gi|193620151|ref|XP_001952691.1|	8.00E-08	PREDICTED: similar to alpha-glucosidase [Acyrthosiphon pisum]
BT_Q_SG_ZJU_Unigene7443	gi|91081755|ref|XP_972918.1|	1.00E-20	PREDICTED: similar to translation initiation factor eIF-2B subunit epsilon [Tribolium castaneum]
BT_Q_SG_ZJU_Unigene7444	gi|34481604|emb|CAE46445.1|	1.00E-18	79 kDa salivary apyrase precursor [Triatoma infestans]
BT_Q_SG_ZJU_Unigene7446	gi|126290370|ref|XP_001368263.1|	1.00E-22	PREDICTED: similar to Stress-70 protein, mitochondrial precursor (75 kDa glucose-regulated protein) (GRP 75) (Peptide-binding protein 74) (PBP74) (Mortalin) (MOT) [Monodelphis domestica]
BT_Q_SG_ZJU_Unigene7450	gi|170067697|ref|XP_001868584.1|	1.00E-06	truncated ER mannose-binding lectin [Culex quinquefasciatus] >gi|167863787|gb|EDS27170.1| truncated ER mannose-binding lectin [Culex quinquefasciatus]
BT_Q_SG_ZJU_Unigene7456	gi|193659604|ref|XP_001952720.1|	3.00E-10	PREDICTED: similar to KRAB-A domain containing 2 [Acyrthosiphon pisum]
BT_Q_SG_ZJU_Unigene7470	gi|148283774|gb|ABQ57387.1|	2.00E-19	alpha glucosidase III [Apis florea]
BT_Q_SG_ZJU_Unigene7475	gi|283135226|ref|NP_001164368.1|	2.00E-08	lipase-like protein [Nasonia vitripennis]
BT_Q_SG_ZJU_Unigene7476	gi|157954039|ref|NP_001103252.1|	2.00E-24	nicotinic acetylcholine receptor alpha 5 subunit isoform 1 [Tribolium castaneum] >gi|154810977|gb|ABS86907.1| nicotinic acetylcholine receptor subunit alpha5 [Tribolium castaneum] >gi|270006448|gb|EFA02896.1| nicotinic acetylcholine receptor subunit alpha5 [Tribolium castaneum]
BT_Q_SG_ZJU_Unigene7486	gi|194854230|ref|XP_001968312.1|	3.00E-31	GG24579 [Drosophila erecta] >gi|190660179|gb|EDV57371.1| GG24579 [Drosophila erecta]
BT_Q_SG_ZJU_Unigene7487	gi|170030269|ref|XP_001843012.1|	2.00E-24	ubiquitin-protein ligase E3A [Culex quinquefasciatus] >gi|167866448|gb|EDS29831.1| ubiquitin-protein ligase E3A [Culex quinquefasciatus]
BT_Q_SG_ZJU_Unigene7490	gi|195584866|ref|XP_002082225.1|	1.00E-36	GD25325 [Drosophila simulans] >gi|194194234|gb|EDX07810.1| GD25325 [Drosophila simulans]
BT_Q_SG_ZJU_Unigene7491	gi|71422952|ref|XP_812294.1|	6.00E-12	dihydrolipoyl dehydrogenase [Trypanosoma cruzi strain CL Brener]
BT_Q_SG_ZJU_Unigene7495	gi|193580260|ref|XP_001951369.1|	3.00E-35	PREDICTED: similar to GA14484-PA [Acyrthosiphon pisum]
BT_Q_SG_ZJU_Unigene7508	gi|193620207|ref|XP_001945314.1|	4.00E-08	PREDICTED: similar to CG13096 CG13096-PA, partial [Acyrthosiphon pisum]
BT_Q_SG_ZJU_Unigene7512	gi|110775866|ref|XP_001121855.1|	2.00E-09	PREDICTED: similar to Excitatory amino acid transporter 3 (Sodium-dependent glutamate/aspartate transporter 3) (Excitatory amino-acid carrier 1), partial [Apis mellifera]
BT_Q_SG_ZJU_Unigene7519	gi|110756306|ref|XP_394455.3|	5.00E-34	PREDICTED: similar to SAC domain-containing protein 3 [Apis mellifera]
BT_Q_SG_ZJU_Unigene7526	gi|157366840|gb|ABV45411.1|	2.00E-35	COE2 [Bemisia tabaci]
BT_Q_SG_ZJU_Unigene7534	gi|91077766|ref|XP_968426.1|	4.00E-18	PREDICTED: similar to WD repeat domain 45 [Tribolium castaneum]
BT_Q_SG_ZJU_Unigene7536	gi|187097096|ref|NP_001119608.1|	5.00E-08	cathepsin B-348 [Acyrthosiphon pisum] >gi|161343833|tpg|DAA06097.1| TPA_inf: cathepsin B [Acyrthosiphon pisum]
BT_Q_SG_ZJU_Unigene7541	gi|193606015|ref|XP_001942911.1|	7.00E-12	PREDICTED: similar to Choline/ethanolamine kinase [Acyrthosiphon pisum]
BT_Q_SG_ZJU_Unigene7542	gi|193591676|ref|XP_001952114.1|	3.00E-23	PREDICTED: similar to ribosome biogenesis protein bop1 (block of proliferation 1 protein) [Acyrthosiphon pisum]
BT_Q_SG_ZJU_Unigene7572	gi|110764013|ref|XP_624077.2|	2.00E-15	PREDICTED: similar to Apoptosis inhibitor 5 (API-5) (AAC-11) [Apis mellifera]
BT_Q_SG_ZJU_Unigene7579	gi|156550807|ref|XP_001600649.1|	1.00E-18	PREDICTED: similar to eukaryotic translation initiation factor 4 gamma, 2 [Nasonia vitripennis]
BT_Q_SG_ZJU_Unigene7600	gi|91091270|ref|XP_969358.1|	5.00E-10	PREDICTED: similar to Sb:cb283 protein [Tribolium castaneum]
BT_Q_SG_ZJU_Unigene7605	gi|118789512|ref|XP_317471.3|	1.00E-18	AGAP007998-PA [Anopheles gambiae str. PEST] >gi|116123253|gb|EAA12403.3| AGAP007998-PA [Anopheles gambiae str. PEST]
BT_Q_SG_ZJU_Unigene7608	gi|193575675|ref|XP_001945965.1|	1.00E-10	PREDICTED: similar to sucrase, partial [Acyrthosiphon pisum]
BT_Q_SG_ZJU_Unigene7613	gi|269973460|emb|CBE66657.1|	5.00E-13	CG12276-PA [Drosophila ananassae]
BT_Q_SG_ZJU_Unigene7614	gi|149689198|gb|ABR27967.1|	3.00E-25	signal recognition particle [Triatoma infestans]
BT_Q_SG_ZJU_Unigene7616	gi|91088569|ref|XP_973042.1|	1.00E-08	PREDICTED: similar to 3-hydroxyacyl-coa dehyrogenase [Tribolium castaneum]
BT_Q_SG_ZJU_Unigene7620	gi|159792926|gb|ABW98683.1|	4.00E-09	alpha-glucosidase binding-toxin receptor [Anopheles gambiae]
BT_Q_SG_ZJU_Unigene7631	gi|158106387|gb|AAP90608.2|	1.00E-32	cytochrome b [Homo sapiens]
BT_Q_SG_ZJU_Unigene7633	gi|91085807|ref|XP_974668.1|	2.00E-10	PREDICTED: similar to UBX domain-containing protein 1 [Tribolium castaneum]
BT_Q_SG_ZJU_Unigene7638	gi|157366840|gb|ABV45411.1|	1.00E-36	COE2 [Bemisia tabaci]
BT_Q_SG_ZJU_Unigene7643	gi|91084493|ref|XP_971912.1|	3.00E-23	PREDICTED: similar to AGAP002331-PA [Tribolium castaneum]
BT_Q_SG_ZJU_Unigene7646	gi|10720059|sp|Q9XYN0.1|INX1_SCHAM	2.00E-36	RecName: Full=Innexin inx1; Short=Innexin-1; AltName: Full=G-Inx1 >gi|4761286|gb|AAD29305.1|AF115853_1 innexin-1 [Schistocerca americana]
BT_Q_SG_ZJU_Unigene7650	gi|195445589|ref|XP_002070394.1|	7.00E-23	GK11052 [Drosophila willistoni] >gi|194166479|gb|EDW81380.1| GK11052 [Drosophila willistoni]
BT_Q_SG_ZJU_Unigene7653	gi|66533242|ref|XP_624942.1|	2.00E-30	PREDICTED: similar to TBP-associated factor 7 CG2670-PA isoform 2 [Apis mellifera]
BT_Q_SG_ZJU_Unigene7671	gi|239788372|dbj|BAH70872.1|	2.00E-27	ACYPI004343 [Acyrthosiphon pisum]
BT_Q_SG_ZJU_Unigene7672	gi|84999112|ref|XP_954277.1|	6.00E-14	phosphoenolpyruvate carboxykinase [Theileria annulata]
BT_Q_SG_ZJU_Unigene7687	gi|156548328|ref|XP_001603122.1|	3.00E-09	PREDICTED: similar to ENSANGP00000028744 [Nasonia vitripennis]
BT_Q_SG_ZJU_Unigene7691	gi|115955204|ref|XP_001188810.1|	3.00E-27	PREDICTED: similar to MGC142779 protein [Strongylocentrotus purpuratus]
BT_Q_SG_ZJU_Unigene7709	gi|61403162|gb|AAH91804.1|	3.00E-08	Zgc:113227 [Danio rerio]
BT_Q_SG_ZJU_Unigene7716	gi|195438112|ref|XP_002066981.1|	2.00E-09	GK24264 [Drosophila willistoni] >gi|194163066|gb|EDW77967.1| GK24264 [Drosophila willistoni]
BT_Q_SG_ZJU_Unigene7717	gi|193636411|ref|XP_001949488.1|	1.00E-12	PREDICTED: similar to AGAP010572-PA [Acyrthosiphon pisum]
BT_Q_SG_ZJU_Unigene7722	gi|170062742|ref|XP_001866801.1|	2.00E-06	probable ER retained protein [Culex quinquefasciatus] >gi|167880566|gb|EDS43949.1| probable ER retained protein [Culex quinquefasciatus]
BT_Q_SG_ZJU_Unigene7724	gi|170031994|ref|XP_001843868.1|	6.00E-14	vesicle associated protein [Culex quinquefasciatus] >gi|167871448|gb|EDS34831.1| vesicle associated protein [Culex quinquefasciatus]
BT_Q_SG_ZJU_Unigene7725	gi|193669489|ref|XP_001951640.1|	2.00E-22	PREDICTED: similar to angiotensin converting enzyme, partial [Acyrthosiphon pisum]
BT_Q_SG_ZJU_Unigene7738	gi|118781983|ref|XP_311987.3|	6.00E-08	AGAP002917-PA [Anopheles gambiae str. PEST] >gi|116129354|gb|EAA07565.3| AGAP002917-PA [Anopheles gambiae str. PEST]
BT_Q_SG_ZJU_Unigene7743	gi|195055147|ref|XP_001994482.1|	1.00E-07	GH15949 [Drosophila grimshawi] >gi|193892245|gb|EDV91111.1| GH15949 [Drosophila grimshawi]
BT_Q_SG_ZJU_Unigene7754	gi|156542987|ref|XP_001602994.1|	1.00E-14	PREDICTED: similar to rac-gtp binding protein [Nasonia vitripennis]
BT_Q_SG_ZJU_Unigene7756	gi|193586979|ref|XP_001952482.1|	7.00E-31	PREDICTED: similar to GA14452-PA [Acyrthosiphon pisum]
BT_Q_SG_ZJU_Unigene7762	gi|193715980|ref|XP_001950264.1|	9.00E-15	PREDICTED: similar to trehalase [Acyrthosiphon pisum]
BT_Q_SG_ZJU_Unigene7764	gi|189237400|ref|XP_001815071.1|	2.00E-19	PREDICTED: similar to AGAP008043-PA [Tribolium castaneum]
BT_Q_SG_ZJU_Unigene7778	gi|189234656|ref|XP_968585.2|	2.00E-19	PREDICTED: similar to tomosyn [Tribolium castaneum]
BT_Q_SG_ZJU_Unigene7782	gi|301629778|ref|XP_002944011.1|	1.00E-17	PREDICTED: probable potassium transport system protein kup-like [Xenopus (Silurana) tropicalis]
BT_Q_SG_ZJU_Unigene7791	gi|156545846|ref|XP_001606331.1|	1.00E-24	PREDICTED: similar to cpg binding protein [Nasonia vitripennis]
BT_Q_SG_ZJU_Unigene7792	gi|50344952|ref|NP_001002148.1|	3.00E-07	ribonuclease P protein subunit p40 [Danio rerio] >gi|47939372|gb|AAH71381.1| Ribonuclease P 40 subunit like [Danio rerio]
BT_Q_SG_ZJU_Unigene7794	gi|126334788|ref|XP_001373199.1|	7.00E-26	PREDICTED: similar to Prickle2 [Monodelphis domestica]
BT_Q_SG_ZJU_Unigene7804	gi|239736502|gb|ACS12990.1|	9.00E-07	14-3-3zeta [Helicoverpa armigera]
BT_Q_SG_ZJU_Unigene7807	gi|239788242|dbj|BAH70809.1|	9.00E-39	ACYPI002632 [Acyrthosiphon pisum]
BT_Q_SG_ZJU_Unigene7820	gi|170571521|ref|XP_001891758.1|	5.00E-18	Transcription factor [Brugia malayi] >gi|170571879|ref|XP_001891903.1| Transcription factor [Brugia malayi] >gi|170572518|ref|XP_001892139.1| Transcription factor [Brugia malayi] >gi|170575826|ref|XP_001893399.1| Transcription factor [Brugia malayi] >gi|170576611|ref|XP_001893699.1| Transcription factor [Brugia malayi] >gi|170577944|ref|XP_001894197.1| Transcription factor [Brugia malayi] >gi|170…
BT_Q_SG_ZJU_Unigene7829	gi|170057370|ref|XP_001864454.1|	7.00E-13	phosphoglucomutase [Culex quinquefasciatus] >gi|167876776|gb|EDS40159.1| phosphoglucomutase [Culex quinquefasciatus]
BT_Q_SG_ZJU_Unigene7831	gi|91093979|ref|XP_969006.1|	1.00E-29	PREDICTED: similar to Tryptophanyl-tRNA synthetase, cytoplasmic (Tryptophan--tRNA ligase) (TrpRS) (Interferon-induced protein 53) (IFP53) (hWRS) [Tribolium castaneum]
BT_Q_SG_ZJU_Unigene7832	gi|66529875|ref|XP_624578.1|	4.00E-30	PREDICTED: similar to CG1796-PA [Apis mellifera]
BT_Q_SG_ZJU_Unigene7834	gi|149581545|ref|XP_001508192.1|	4.00E-07	PREDICTED: similar to HSPC005, partial [Ornithorhynchus anatinus]
BT_Q_SG_ZJU_Unigene7838	gi|66560996|ref|XP_624918.1|	2.00E-24	PREDICTED: similar to CG9099-PA [Apis mellifera]
BT_Q_SG_ZJU_Unigene7841	gi|66517659|ref|XP_625100.1|	7.00E-25	PREDICTED: similar to CG1532-PA [Apis mellifera]
BT_Q_SG_ZJU_Unigene7845	gi|195110541|ref|XP_001999838.1|	6.00E-17	GI24746 [Drosophila mojavensis] >gi|193916432|gb|EDW15299.1| GI24746 [Drosophila mojavensis]
BT_Q_SG_ZJU_Unigene7852	gi|48097418|ref|XP_393779.1|	2.00E-12	PREDICTED: similar to CG1968-PA, isoform A [Apis mellifera]
BT_Q_SG_ZJU_Unigene7853	gi|301629268|ref|XP_002943766.1|	2.00E-09	PREDICTED: a-type flagellin-like [Xenopus (Silurana) tropicalis]
BT_Q_SG_ZJU_Unigene7855	gi|193673918|ref|XP_001949424.1|	2.00E-11	PREDICTED: similar to CG5867 CG5867-PA [Acyrthosiphon pisum]
BT_Q_SG_ZJU_Unigene7859	gi|91086285|ref|XP_967226.1|	9.00E-15	PREDICTED: similar to CG6178 CG6178-PA isoform 1 [Tribolium castaneum]
BT_Q_SG_ZJU_Unigene7863	gi|211830470|gb|AAH32191.2|	1.00E-08	Cherp protein [Mus musculus]
BT_Q_SG_ZJU_Unigene7872	gi|193697424|ref|XP_001952725.1|	9.00E-07	PREDICTED: similar to methyl-CpG binding domain protein 6 [Acyrthosiphon pisum]
BT_Q_SG_ZJU_Unigene7877	gi|110760342|ref|XP_397483.3|	2.00E-30	PREDICTED: similar to CG7728-PA [Apis mellifera]
BT_Q_SG_ZJU_Unigene7881	gi|187281665|ref|NP_001119722.1|	3.00E-29	serine/threonine kinase LKB1 [Bombyx mori] >gi|183448420|gb|ACC62888.1| serine/threonine kinase LKB1 [Bombyx mori]
BT_Q_SG_ZJU_Unigene7884	gi|156542831|ref|XP_001608123.1|	6.00E-09	PREDICTED: similar to ENSANGP00000015665 [Nasonia vitripennis]
BT_Q_SG_ZJU_Unigene7889	gi|195395288|ref|XP_002056268.1|	6.00E-29	GJ10851 [Drosophila virilis] >gi|194142977|gb|EDW59380.1| GJ10851 [Drosophila virilis]
BT_Q_SG_ZJU_Unigene7900	gi|156545557|ref|XP_001606463.1|	2.00E-37	PREDICTED: similar to ENSANGP00000012893 [Nasonia vitripennis]
BT_Q_SG_ZJU_Unigene7913	gi|229608905|ref|NP_001153475.1|	5.00E-27	moca cyclophilin [Nasonia vitripennis]
BT_Q_SG_ZJU_Unigene7914	gi|239791786|dbj|BAH72313.1|	3.00E-14	ACYPI004786 [Acyrthosiphon pisum]
BT_Q_SG_ZJU_Unigene7922	gi|195456962|ref|XP_002075365.1|	2.00E-12	GK17644 [Drosophila willistoni] >gi|194171450|gb|EDW86351.1| GK17644 [Drosophila willistoni]
BT_Q_SG_ZJU_Unigene7927	gi|156538291|ref|XP_001603481.1|	3.00E-19	PREDICTED: similar to RE59650p [Nasonia vitripennis]
BT_Q_SG_ZJU_Unigene7939	gi|239788395|dbj|BAH70882.1|	4.00E-36	ACYPI003183 [Acyrthosiphon pisum]
BT_Q_SG_ZJU_Unigene7943	gi|194747868|ref|XP_001956371.1|	3.00E-15	GF25175 [Drosophila ananassae] >gi|190623653|gb|EDV39177.1| GF25175 [Drosophila ananassae]
BT_Q_SG_ZJU_Unigene7945	gi|193662122|ref|XP_001950215.1|	2.00E-19	PREDICTED: similar to testis enhanced gene transcript-like protein [Acyrthosiphon pisum]
BT_Q_SG_ZJU_Unigene7948	gi|291244128|ref|XP_002741951.1|	4.00E-25	PREDICTED: Fas-associated factor-like [Saccoglossus kowalevskii]
BT_Q_SG_ZJU_Unigene7951	gi|291391581|ref|XP_002712235.1|	6.00E-30	PREDICTED: glycerol-3-phosphate dehydrogenase 2, mitochondrial [Oryctolagus cuniculus]
BT_Q_SG_ZJU_Unigene7953	gi|170052591|ref|XP_001862291.1|	2.00E-23	GTP-binding protein SAR2 [Culex quinquefasciatus] >gi|167873446|gb|EDS36829.1| GTP-binding protein SAR2 [Culex quinquefasciatus]
BT_Q_SG_ZJU_Unigene7965	gi|110671512|gb|ABG82007.1|	1.00E-07	putative ribosomal protein L13 [Diaphorina citri]
BT_Q_SG_ZJU_Unigene7980	gi|268532588|ref|XP_002631422.1|	4.00E-07	Hypothetical protein CBG03276 [Caenorhabditis briggsae] >gi|187036738|emb|CAP23402.1| Hypothetical protein CBG03276 [Caenorhabditis briggsae]
BT_Q_SG_ZJU_Unigene7987	gi|114052344|ref|NP_001040237.1|	5.00E-07	calcitonin gene-related peptide-receptor component protein [Bombyx mori] >gi|87248471|gb|ABD36288.1| calcitonin gene-related peptide-receptor component protein [Bombyx mori]
BT_Q_SG_ZJU_Unigene7991	gi|153792609|ref|NP_001093277.1|	9.00E-31	tropomyosin-2 isoform 4 [Bombyx mori] >gi|95103006|gb|ABF51444.1| tropomyosin isoform 4 [Bombyx mori]
BT_Q_SG_ZJU_Unigene7994	gi|193716185|ref|XP_001946691.1|	4.00E-10	PREDICTED: similar to GH03753p [Acyrthosiphon pisum]
BT_Q_SG_ZJU_Unigene8008	gi|195469711|ref|XP_002099780.1|	2.00E-29	GE16533 [Drosophila yakuba] >gi|194187304|gb|EDX00888.1| GE16533 [Drosophila yakuba]
BT_Q_SG_ZJU_Unigene8009	gi|58384361|ref|XP_313256.2|	2.00E-23	AGAP003517-PA [Anopheles gambiae str. PEST] >gi|55240977|gb|EAA08937.2| AGAP003517-PA [Anopheles gambiae str. PEST]
BT_Q_SG_ZJU_Unigene8011	gi|170045138|ref|XP_001850177.1|	2.00E-24	sorcin [Culex quinquefasciatus] >gi|167868150|gb|EDS31533.1| sorcin [Culex quinquefasciatus]
BT_Q_SG_ZJU_Unigene8017	gi|198459887|ref|XP_002136038.1|	3.00E-14	GA23193 [Drosophila pseudoobscura pseudoobscura] >gi|198140190|gb|EDY70977.1| GA23193 [Drosophila pseudoobscura pseudoobscura]
BT_Q_SG_ZJU_Unigene8022	gi|238231783|ref|NP_001154078.1|	2.00E-06	Prefoldin subunit 4 [Oncorhynchus mykiss] >gi|225703894|gb|ACO07793.1| Prefoldin subunit 4 [Oncorhynchus mykiss]
BT_Q_SG_ZJU_Unigene8023	gi|170030259|ref|XP_001843007.1|	2.00E-34	platelet-activating factor acetylhydrolase 1b alpha subunit [Culex quinquefasciatus] >gi|167866443|gb|EDS29826.1| platelet-activating factor acetylhydrolase 1b alpha subunit [Culex quinquefasciatus]
BT_Q_SG_ZJU_Unigene8024	gi|21356301|ref|NP_651363.1|	7.00E-12	CG10425 [Drosophila melanogaster] >gi|7301303|gb|AAF56432.1| CG10425 [Drosophila melanogaster] >gi|17862082|gb|AAL39518.1| LD07939p [Drosophila melanogaster] >gi|220942950|gb|ACL84018.1| CG10425-PA [synthetic construct] >gi|220953168|gb|ACL89127.1| CG10425-PA [synthetic construct]
BT_Q_SG_ZJU_Unigene8035	gi|119584581|gb|EAW64177.1|	1.00E-12	hCG2042888, isoform CRA_a [Homo sapiens] >gi|119584582|gb|EAW64178.1| hCG2042888, isoform CRA_a [Homo sapiens] >gi|119584583|gb|EAW64179.1| hCG2042888, isoform CRA_a [Homo sapiens]
BT_Q_SG_ZJU_Unigene8039	gi|156542347|ref|XP_001600061.1|	8.00E-06	PREDICTED: similar to ENSANGP00000010758 [Nasonia vitripennis]
BT_Q_SG_ZJU_Unigene8044	gi|110749888|ref|XP_394154.3|	8.00E-35	PREDICTED: similar to dystrophin CG31175-PA, isoform A [Apis mellifera]
BT_Q_SG_ZJU_Unigene8048	gi|48097366|ref|XP_393761.1|	3.00E-29	PREDICTED: similar to ran CG1404-PA, isoform A [Apis mellifera]
BT_Q_SG_ZJU_Unigene8052	gi|301629566|ref|XP_002943909.1|	6.00E-27	PREDICTED: UPF0313 protein PA4928-like [Xenopus (Silurana) tropicalis]
BT_Q_SG_ZJU_Unigene8056	gi|158300861|ref|XP_320678.4|	6.00E-29	AGAP011839-PA [Anopheles gambiae str. PEST] >gi|157013365|gb|EAA00326.4| AGAP011839-PA [Anopheles gambiae str. PEST]
BT_Q_SG_ZJU_Unigene8057	gi|297300421|ref|XP_001118631.2|	3.00E-16	PREDICTED: aldo-keto reductase family 1 member C4 [Macaca mulatta]
BT_Q_SG_ZJU_Unigene8059	gi|156542369|ref|XP_001600536.1|	1.00E-20	PREDICTED: similar to CG2767-PA [Nasonia vitripennis]
BT_Q_SG_ZJU_Unigene8062	gi|195119973|ref|XP_002004503.1|	7.00E-26	GI19579 [Drosophila mojavensis] >gi|193909571|gb|EDW08438.1| GI19579 [Drosophila mojavensis]
BT_Q_SG_ZJU_Unigene8074	gi|156538693|ref|XP_001607780.1|	8.00E-22	PREDICTED: similar to spermidine synthase [Nasonia vitripennis]
BT_Q_SG_ZJU_Unigene8080	gi|38328396|gb|AAH62283.1|	1.00E-08	Zgc:77808 [Danio rerio]
BT_Q_SG_ZJU_Unigene8091	gi|193594230|ref|XP_001951127.1|	1.00E-20	PREDICTED: similar to AGAP010575-PA [Acyrthosiphon pisum]
BT_Q_SG_ZJU_Unigene8097	gi|110762477|ref|XP_625082.2|	2.00E-13	PREDICTED: similar to CG18041-PA [Apis mellifera]
BT_Q_SG_ZJU_Unigene8098	gi|66812350|ref|XP_640354.1|	2.00E-06	protein phosphatase 2C [Dictyostelium discoideum AX4] >gi|74897139|sp|Q54T01.1|Y2105_DICDI RecName: Full=Probable protein phosphatase DDB_G0282105 >gi|60468372|gb|EAL66378.1| protein phosphatase 2C [Dictyostelium discoideum AX4]
BT_Q_SG_ZJU_Unigene8102	gi|193716217|ref|XP_001949010.1|	3.00E-18	PREDICTED: similar to protein-tyrosine phosphatase, non-receptor type nt5 [Acyrthosiphon pisum]
BT_Q_SG_ZJU_Unigene8104	gi|193652476|ref|XP_001947296.1|	1.00E-17	PREDICTED: similar to AGAP008497-PA [Acyrthosiphon pisum]
BT_Q_SG_ZJU_Unigene8106	gi|118098350|ref|XP_424611.2|	2.00E-06	PREDICTED: similar to ubiquinol--cytochrome c reductase [Gallus gallus]
BT_Q_SG_ZJU_Unigene8115	gi|242013215|ref|XP_002427310.1|	6.00E-08	Bromodomain-containing protein, putative [Pediculus humanus corporis] >gi|212511651|gb|EEB14572.1| Bromodomain-containing protein, putative [Pediculus humanus corporis]
BT_Q_SG_ZJU_Unigene8116	gi|198476336|ref|XP_001357338.2|	1.00E-09	GA16525 [Drosophila pseudoobscura pseudoobscura] >gi|198137648|gb|EAL34407.2| GA16525 [Drosophila pseudoobscura pseudoobscura]
BT_Q_SG_ZJU_Unigene8120	gi|110763559|ref|XP_001120044.1|	7.00E-20	PREDICTED: similar to Sarcoglycan CG7851-PA [Apis mellifera]
BT_Q_SG_ZJU_Unigene8126	gi|301632444|ref|XP_002945295.1|	1.00E-23	PREDICTED: phosphate import ATP-binding protein pstB-like [Xenopus (Silurana) tropicalis]
BT_Q_SG_ZJU_Unigene8141	gi|208657805|gb|ACI30196.1|	1.00E-07	emp24/gp25L/p24 family of membrane trafficking protein [Anopheles darlingi]
BT_Q_SG_ZJU_Unigene8144	gi|148698380|gb|EDL30327.1|	4.00E-15	RIKEN cDNA 2310005N01, isoform CRA_d [Mus musculus]
BT_Q_SG_ZJU_Unigene8145	gi|189235571|ref|XP_001812213.1|	1.00E-38	PREDICTED: similar to wd-repeat protein [Tribolium castaneum]
BT_Q_SG_ZJU_Unigene8147	gi|91094849|ref|XP_971994.1|	1.00E-08	PREDICTED: similar to queuine tRNA-ribosyltransferase [Tribolium castaneum]
BT_Q_SG_ZJU_Unigene8149	gi|110757619|ref|XP_001120141.1|	3.00E-33	PREDICTED: similar to Arflike at 72A CG6025-PA [Apis mellifera]
BT_Q_SG_ZJU_Unigene8151	gi|110763851|ref|XP_393444.3|	5.00E-35	PREDICTED: similar to CG11870-PA, isoform A isoform 1 [Apis mellifera]
BT_Q_SG_ZJU_Unigene8158	gi|170035496|ref|XP_001845605.1|	1.00E-25	saccharopine dehydrogenase domain-containing protein [Culex quinquefasciatus] >gi|167877517|gb|EDS40900.1| saccharopine dehydrogenase domain-containing protein [Culex quinquefasciatus]
BT_Q_SG_ZJU_Unigene8161	gi|239790504|dbj|BAH71809.1|	3.00E-12	ACYPI000473 [Acyrthosiphon pisum]
BT_Q_SG_ZJU_Unigene8165	gi|66556682|ref|XP_395304.2|	7.00E-18	PREDICTED: similar to TatD DNase domain containing 1 [Apis mellifera]
BT_Q_SG_ZJU_Unigene8168	gi|110755194|ref|XP_001119862.1|	1.00E-07	PREDICTED: similar to CG4364-PA [Apis mellifera]
BT_Q_SG_ZJU_Unigene8169	gi|251823681|dbj|BAH83704.1|	3.00E-13	copper zinc superoxide dismutase [Diaphorina citri]
BT_Q_SG_ZJU_Unigene8174	gi|1513061|dbj|BAA13323.1|	2.00E-12	cyanoprotein alpha subunit precursor [Riptortus clavatus]
BT_Q_SG_ZJU_Unigene8176	gi|201861695|ref|NP_001128462.1|	3.00E-15	N(6)-adenine-specific DNA methyltransferase 2 [Rattus norvegicus] >gi|197245794|gb|AAI68660.1| N6amt2 protein [Rattus norvegicus]
BT_Q_SG_ZJU_Unigene8180	gi|283046718|ref|NP_001164305.1|	5.00E-39	NADH dehydrogenase [ubiquinone] flavoprotein 1, mitochondrial [Tribolium castaneum]
BT_Q_SG_ZJU_Unigene8184	gi|195389911|ref|XP_002053615.1|	1.00E-13	GJ23993 [Drosophila virilis] >gi|194151701|gb|EDW67135.1| GJ23993 [Drosophila virilis]
BT_Q_SG_ZJU_Unigene8188	gi|300116730|ref|NP_001177858.1|	2.00E-07	small nuclear ribonucleoprotein F [Nasonia vitripennis]
BT_Q_SG_ZJU_Unigene8194	gi|301630430|ref|XP_002944324.1|	3.00E-23	PREDICTED: chemotaxis protein cheA-like [Xenopus (Silurana) tropicalis]
BT_Q_SG_ZJU_Unigene8196	gi|91086893|ref|XP_970527.1|	6.00E-09	PREDICTED: similar to CG3760 CG3760-PB [Tribolium castaneum]
BT_Q_SG_ZJU_Unigene8220	gi|149018820|gb|EDL77461.1|	2.00E-36	coatomer protein complex, subunit beta 2 (beta prime) [Rattus norvegicus]
BT_Q_SG_ZJU_Unigene8241	gi|110762612|ref|XP_391996.3|	1.00E-15	PREDICTED: similar to Protein C12orf11 (Sarcoma antigen NY-SAR-95) [Apis mellifera]
BT_Q_SG_ZJU_Unigene8243	gi|110775792|ref|XP_396987.3|	1.00E-08	PREDICTED: similar to CG8949-PA [Apis mellifera]
BT_Q_SG_ZJU_Unigene8248	gi|221124474|ref|XP_002165936.1|	4.00E-09	PREDICTED: similar to mitochondrial trifunctional protein, alpha subunit [Hydra magnipapillata]
BT_Q_SG_ZJU_Unigene8251	gi|110759435|ref|XP_392783.3|	2.00E-10	PREDICTED: similar to CG5274-PA, isoform A [Apis mellifera]
BT_Q_SG_ZJU_Unigene8252	gi|91086915|ref|XP_971472.1|	7.00E-09	PREDICTED: similar to Dihydroxyacetone phosphate acyltransferase CG4625-PA [Tribolium castaneum]
BT_Q_SG_ZJU_Unigene8253	gi|66564353|ref|XP_623465.1|	1.00E-30	PREDICTED: similar to CG8841-PA, isoform A isoform 1 [Apis mellifera]
BT_Q_SG_ZJU_Unigene8256	gi|110762477|ref|XP_625082.2|	2.00E-14	PREDICTED: similar to CG18041-PA [Apis mellifera]
BT_Q_SG_ZJU_Unigene8257	gi|195118578|ref|XP_002003813.1|	5.00E-35	GI18107 [Drosophila mojavensis] >gi|193914388|gb|EDW13255.1| GI18107 [Drosophila mojavensis]
BT_Q_SG_ZJU_Unigene8267	gi|193624682|ref|XP_001943160.1|	1.00E-09	PREDICTED: similar to cirhin [Acyrthosiphon pisum]
BT_Q_SG_ZJU_Unigene8270	gi|213688423|ref|NP_001094241.1|	9.00E-10	ESF1 homolog [Rattus norvegicus] >gi|81864960|sp|Q76MT4.1|ESF1_RAT RecName: Full=ESF1 homolog; AltName: Full=ABT1-associated protein >gi|42491219|dbj|BAD10946.1| ABTAP [Rattus rattus] >gi|149023426|gb|EDL80320.1| similar to chromosome 20 open reading frame 6 [Rattus norvegicus]
BT_Q_SG_ZJU_Unigene8281	gi|195539327|ref|NP_001124190.1|	8.00E-08	argonaute 1 [Strongylocentrotus purpuratus] >gi|190151807|gb|ACE63524.1| argonaute 1 [Strongylocentrotus purpuratus]
BT_Q_SG_ZJU_Unigene8283	gi|113205580|ref|NP_001037895.1|	3.00E-06	ubiquinol-cytochrome c reductase complex [Xenopus (Silurana) tropicalis] >gi|89269531|emb|CAJ82412.1| ubiquinol-cytochrome c reductase complex (7.2 kD) (ucrc) [Xenopus tropicalis] >gi|160774282|gb|AAI55049.1| ubiquinol-cytochrome c reductase complex (7.2 kD) (ucrc) [Xenopus (Silurana) tropicalis]
BT_Q_SG_ZJU_Unigene8290	gi|158288301|ref|XP_310183.4|	1.00E-23	AGAP009512-PA [Anopheles gambiae str. PEST] >gi|157019184|gb|EAA05935.4| AGAP009512-PA [Anopheles gambiae str. PEST]
BT_Q_SG_ZJU_Unigene8295	gi|91090562|ref|XP_971599.1|	2.00E-29	PREDICTED: similar to CG31522 CG31522-PB [Tribolium castaneum]
BT_Q_SG_ZJU_Unigene8308	gi|239791366|dbj|BAH72158.1|	1.00E-08	ACYPI001055 [Acyrthosiphon pisum]
BT_Q_SG_ZJU_Unigene8314	gi|156555646|ref|XP_001603631.1|	5.00E-39	PREDICTED: similar to coproporphyrinogen iii oxidase [Nasonia vitripennis]
BT_Q_SG_ZJU_Unigene8316	gi|66521734|ref|XP_623433.1|	4.00E-33	PREDICTED: similar to CG7197-PA [Apis mellifera]
BT_Q_SG_ZJU_Unigene8321	gi|91079340|ref|XP_969318.1|	6.00E-29	PREDICTED: similar to CG5703 CG5703-PA [Tribolium castaneum] >gi|270004890|gb|EFA01338.1| NADH dehydrogenase (ubiquinone) flavoprotein 2 [Tribolium castaneum]
BT_Q_SG_ZJU_Unigene8322	gi|193685871|ref|XP_001943243.1|	6.00E-13	PREDICTED: similar to sucrase, partial [Acyrthosiphon pisum]
BT_Q_SG_ZJU_Unigene8323	gi|198429457|ref|XP_002129806.1|	4.00E-08	PREDICTED: similar to MGC82375 protein [Ciona intestinalis]
BT_Q_SG_ZJU_Unigene8329	gi|239793557|dbj|BAH72890.1|	1.00E-23	ACYPI006050 [Acyrthosiphon pisum]
BT_Q_SG_ZJU_Unigene8333	gi|194867436|ref|XP_001972071.1|	8.00E-22	GG14088 [Drosophila erecta] >gi|190653854|gb|EDV51097.1| GG14088 [Drosophila erecta]
BT_Q_SG_ZJU_Unigene8340	gi|301630809|ref|XP_002944509.1|	1.00E-25	PREDICTED: acriflavine resistance protein B-like [Xenopus (Silurana) tropicalis]
BT_Q_SG_ZJU_Unigene8349	gi|156540123|ref|XP_001600481.1|	7.00E-23	PREDICTED: similar to polyprotein [Nasonia vitripennis]
BT_Q_SG_ZJU_Unigene8350	gi|21426853|ref|NP_079605.1|	2.00E-20	tctex1 domain-containing protein 2 [Mus musculus] >gi|81903528|sp|Q9CQ66.1|TC1D2_MOUSE RecName: Full=Tctex1 domain-containing protein 2 >gi|37589872|gb|AAH59716.1| Tctex1 domain containing 2 [Mus musculus] >gi|148665371|gb|EDK97787.1| RIKEN cDNA 0610012D17, isoform CRA_a [Mus musculus]
BT_Q_SG_ZJU_Unigene8355	gi|195114602|ref|XP_002001856.1|	1.00E-12	GI14725 [Drosophila mojavensis] >gi|193912431|gb|EDW11298.1| GI14725 [Drosophila mojavensis]
BT_Q_SG_ZJU_Unigene8370	gi|156105469|gb|ABU49220.1|	2.00E-20	mitochondrial malate-dehydrogenase [Toxoplasma gondii]
BT_Q_SG_ZJU_Unigene8371	gi|193582439|ref|XP_001944719.1|	1.00E-05	PREDICTED: similar to AGAP004049-PA [Acyrthosiphon pisum]
BT_Q_SG_ZJU_Unigene8375	gi|170037145|ref|XP_001846420.1|	3.00E-18	NADH dehydrogenase [Culex quinquefasciatus] >gi|167880174|gb|EDS43557.1| NADH dehydrogenase [Culex quinquefasciatus]
BT_Q_SG_ZJU_Unigene8378	gi|115721580|ref|XP_001195305.1|	1.00E-05	PREDICTED: similar to pinin [Strongylocentrotus purpuratus] >gi|115813389|ref|XP_785510.2| PREDICTED: similar to pinin [Strongylocentrotus purpuratus]
BT_Q_SG_ZJU_Unigene8392	gi|157133341|ref|XP_001656210.1|	2.00E-30	citrate synthase [Aedes aegypti] >gi|122095223|sp|Q17GM7.1|CISY1_AEDAE RecName: Full=Probable citrate synthase 1, mitochondrial; Flags: Precursor >gi|108881547|gb|EAT45772.1| citrate synthase [Aedes aegypti]
BT_Q_SG_ZJU_Unigene8393	gi|254972104|gb|ACT98280.1|	2.00E-21	msh-like protein [Schmidtea mediterranea]
BT_Q_SG_ZJU_Unigene8398	gi|72004937|ref|XP_782391.1|	2.00E-07	PREDICTED: similar to Nucleolar protein family A, member 2 [Strongylocentrotus purpuratus] >gi|115924861|ref|XP_001191180.1| PREDICTED: similar to Nucleolar protein family A, member 2 [Strongylocentrotus purpuratus]
BT_Q_SG_ZJU_Unigene8401	gi|110764207|ref|XP_001123355.1|	5.00E-12	PREDICTED: similar to acylpeptide hydrolase [Apis mellifera]
BT_Q_SG_ZJU_Unigene8405	gi|66524360|ref|XP_393963.2|	4.00E-16	PREDICTED: similar to Trehalase precursor (Alpha,alpha-trehalase) (Alpha,alpha-trehalose glucohydrolase) [Apis mellifera]
BT_Q_SG_ZJU_Unigene8412	gi|170030791|ref|XP_001843271.1|	4.00E-16	NAD-dependent deacetylase sirtuin-4 [Culex quinquefasciatus] >gi|167868390|gb|EDS31773.1| NAD-dependent deacetylase sirtuin-4 [Culex quinquefasciatus]
BT_Q_SG_ZJU_Unigene8425	gi|158293175|ref|XP_314511.4|	1.00E-11	AGAP010543-PA [Anopheles gambiae str. PEST] >gi|157016832|gb|EAA09869.4| AGAP010543-PA [Anopheles gambiae str. PEST]
BT_Q_SG_ZJU_Unigene8433	gi|169219461|dbj|BAG12118.1|	2.00E-06	vitellogenin [Lethocerus deyrollei]
BT_Q_SG_ZJU_Unigene8436	gi|193643359|ref|XP_001944573.1|	6.00E-06	PREDICTED: similar to UPF0493 protein KIAA1632 homolog [Acyrthosiphon pisum]
BT_Q_SG_ZJU_Unigene8455	gi|157105484|ref|XP_001648889.1|	5.00E-32	fk506-binding protein [Aedes aegypti] >gi|108880073|gb|EAT44298.1| fk506-binding protein [Aedes aegypti]
BT_Q_SG_ZJU_Unigene8458	gi|110756000|ref|XP_392332.3|	3.00E-09	PREDICTED: similar to six-banded CG13598-PB, isoform B [Apis mellifera]
BT_Q_SG_ZJU_Unigene8460	gi|66522931|ref|XP_623191.1|	4.00E-18	PREDICTED: similar to ergic53 CG6822-PA, isoform A isoform 1 [Apis mellifera]
BT_Q_SG_ZJU_Unigene8472	gi|268607518|ref|NP_001161331.1|	1.00E-20	eukaryotic translation initiation factor 4 gamma [Nasonia vitripennis]
BT_Q_SG_ZJU_Unigene8474	gi|156619401|gb|ABU88380.1|	5.00E-11	serine carboxypeptidase SCP-2 [Triatoma brasiliensis]
BT_Q_SG_ZJU_Unigene8480	gi|221127715|ref|XP_002165509.1|	4.00E-08	PREDICTED: similar to predicted protein [Hydra magnipapillata]
BT_Q_SG_ZJU_Unigene8481	gi|34979797|gb|AAQ83887.1|	6.00E-14	cathepsin B [Branchiostoma belcheri tsingtauense]
BT_Q_SG_ZJU_Unigene8482	gi|108742504|gb|ABG01888.1|	3.00E-14	fasciclin-like protein [Gryllus rubens]
BT_Q_SG_ZJU_Unigene8493	gi|193699929|ref|XP_001951096.1|	7.00E-15	PREDICTED: similar to SEC14 (S. cerevisiae)-like 1 [Acyrthosiphon pisum]
BT_Q_SG_ZJU_Unigene8504	gi|254679590|gb|ACT78498.1|	2.00E-22	actin 1 [Ditylenchus destructor]
BT_Q_SG_ZJU_Unigene8505	gi|157168003|ref|XP_001663281.1|	8.00E-11	protein phsophatase-2a [Aedes aegypti] >gi|108870494|gb|EAT34719.1| protein phsophatase-2a [Aedes aegypti]
BT_Q_SG_ZJU_Unigene8506	gi|156537359|ref|XP_001607555.1|	2.00E-20	PREDICTED: similar to mitochondrial ribosomal protein S12 [Nasonia vitripennis]
BT_Q_SG_ZJU_Unigene8508	gi|156553534|ref|XP_001602068.1|	2.00E-22	PREDICTED: similar to GA11007-PA [Nasonia vitripennis]
BT_Q_SG_ZJU_Unigene8512	gi|91092888|ref|XP_970625.1|	4.00E-06	PREDICTED: similar to tRNA isopentenyltransferase 1 [Tribolium castaneum]
BT_Q_SG_ZJU_Unigene8514	gi|239790789|dbj|BAH71932.1|	4.00E-16	ACYPI002449 [Acyrthosiphon pisum]
BT_Q_SG_ZJU_Unigene8515	gi|193652525|ref|XP_001942924.1|	2.00E-07	PREDICTED: similar to CG4848 CG4848-PA [Acyrthosiphon pisum]
BT_Q_SG_ZJU_Unigene8522	gi|73992740|ref|XP_855343.1|	5.00E-31	PREDICTED: similar to statin-like [Canis familiaris]
BT_Q_SG_ZJU_Unigene8523	gi|94468998|gb|ABF18348.1|	1.00E-34	mitochondrial phosphate carrier protein [Aedes aegypti]
BT_Q_SG_ZJU_Unigene8530	gi|189235527|ref|XP_972097.2|	3.00E-12	PREDICTED: similar to mitochondrial inner membrane protein translocase, 13kD-subunit [Tribolium castaneum]
BT_Q_SG_ZJU_Unigene8536	gi|110760212|ref|XP_393171.3|	9.00E-15	PREDICTED: similar to DNA polymerase CG6768-PA [Apis mellifera]
BT_Q_SG_ZJU_Unigene8548	gi|193631915|ref|XP_001946888.1|	3.00E-12	PREDICTED: similar to brca1-associated protein (brap2) [Acyrthosiphon pisum]
BT_Q_SG_ZJU_Unigene8555	gi|193652361|ref|XP_001949600.1|	4.00E-17	PREDICTED: similar to fumarylacetoacetate hydrolase [Acyrthosiphon pisum]
BT_Q_SG_ZJU_Unigene8557	gi|91081817|ref|XP_974377.1|	7.00E-10	PREDICTED: similar to AGAP011803-PA [Tribolium castaneum]
BT_Q_SG_ZJU_Unigene8560	gi|20151909|gb|AAM11314.1|	3.00E-21	SD03319p [Drosophila melanogaster]
BT_Q_SG_ZJU_Unigene8564	gi|154091250|gb|ABS57435.1|	1.00E-19	ribosomal protein S25 [Heliconius melpomene]
BT_Q_SG_ZJU_Unigene8565	gi|157118913|ref|XP_001659245.1|	5.00E-10	apl5 protein (spac144.06 protein) [Aedes aegypti] >gi|108875528|gb|EAT39753.1| apl5 protein (spac144.06 protein) [Aedes aegypti]
BT_Q_SG_ZJU_Unigene8572	gi|110756146|ref|XP_392643.3|	9.00E-26	PREDICTED: similar to eIF2B- CG7883-PA [Apis mellifera]
BT_Q_SG_ZJU_Unigene8581	gi|289740483|gb|ADD18989.1|	7.00E-28	chaperonin complex component TcP-1 beta subunit CCT2 [Glossina morsitans morsitans]
BT_Q_SG_ZJU_Unigene8584	gi|58389688|ref|XP_317207.2|	2.00E-35	AGAP008265-PA [Anopheles gambiae str. PEST] >gi|55237426|gb|EAA12316.2| AGAP008265-PA [Anopheles gambiae str. PEST]
BT_Q_SG_ZJU_Unigene8586	gi|295393298|gb|ADG03469.1|	2.00E-35	heat shock protein 90 [Bemisia tabaci]
BT_Q_SG_ZJU_Unigene8587	gi|91077026|ref|XP_967151.1|	5.00E-29	PREDICTED: similar to AGAP000682-PA [Tribolium castaneum]
BT_Q_SG_ZJU_Unigene8598	gi|158299918|ref|XP_001689222.1|	8.00E-06	AGAP009163-PA [Anopheles gambiae str. PEST] >gi|157013749|gb|EDO63400.1| AGAP009163-PA [Anopheles gambiae str. PEST]
BT_Q_SG_ZJU_Unigene8601	gi|66512193|ref|XP_392437.2|	4.00E-23	PREDICTED: similar to CG9172-PA, isoform A [Apis mellifera]
BT_Q_SG_ZJU_Unigene8611	gi|193676424|ref|XP_001945893.1|	3.00E-12	PREDICTED: similar to establishment of cohesion 1 homolog 2 [Acyrthosiphon pisum]
BT_Q_SG_ZJU_Unigene8615	gi|195496197|ref|XP_002095591.1|	2.00E-10	GE22482 [Drosophila yakuba] >gi|194181692|gb|EDW95303.1| GE22482 [Drosophila yakuba]
BT_Q_SG_ZJU_Unigene8619	gi|189234848|ref|XP_972516.2|	1.00E-16	PREDICTED: similar to CG14903 CG14903-PA [Tribolium castaneum]
BT_Q_SG_ZJU_Unigene8623	gi|195107325|ref|XP_001998264.1|	5.00E-29	GI23728 [Drosophila mojavensis] >gi|193914858|gb|EDW13725.1| GI23728 [Drosophila mojavensis]
BT_Q_SG_ZJU_Unigene8625	gi|229892214|ref|NP_001153524.1|	5.00E-37	heat shock protein cognate 3 [Apis mellifera]
BT_Q_SG_ZJU_Unigene8629	gi|110756927|ref|XP_394588.3|	9.00E-15	PREDICTED: similar to Synaptosomal-associated protein 25 (SNAP-25) (Synaptosomal-associated 25 kDa protein) isoform 1 [Apis mellifera]
BT_Q_SG_ZJU_Unigene8635	gi|189236196|ref|XP_970307.2|	2.00E-17	PREDICTED: similar to glucosyl/glucuronosyl transferases [Tribolium castaneum]
BT_Q_SG_ZJU_Unigene8637	gi|289739717|gb|ADD18606.1|	2.00E-32	multifunctional chaperone [Glossina morsitans morsitans]
BT_Q_SG_ZJU_Unigene8641	gi|91090980|ref|XP_974800.1|	1.00E-20	PREDICTED: similar to AGAP002364-PA [Tribolium castaneum]
BT_Q_SG_ZJU_Unigene8642	gi|45360759|ref|NP_989053.1|	3.00E-07	protein-kinase, interferon-inducible double stranded RNA dependent inhibitor, repressor of (P58 repressor) [Xenopus (Silurana) tropicalis] >gi|38174068|gb|AAH61337.1| protein-kinase, interferon-inducible double stranded RNA dependent inhibitor, repressor of (P58 repressor) [Xenopus (Silurana) tropicalis]
BT_Q_SG_ZJU_Unigene8645	gi|221487509|gb|EEE25741.1|	4.00E-06	conserved hypothetical protein [Toxoplasma gondii GT1]
BT_Q_SG_ZJU_Unigene8652	gi|189236353|ref|XP_001807129.1|	5.00E-31	PREDICTED: similar to signal recognition particle receptor alpha subunit (sr-alpha) [Tribolium castaneum]
BT_Q_SG_ZJU_Unigene8653	gi|301630256|ref|XP_002944238.1|	2.00E-07	PREDICTED: 50S ribosomal protein L22-like, partial [Xenopus (Silurana) tropicalis]
BT_Q_SG_ZJU_Unigene8654	gi|110755313|ref|XP_001121186.1|	2.00E-08	PREDICTED: similar to CG7042-PA [Apis mellifera]
BT_Q_SG_ZJU_Unigene8656	gi|66561865|ref|XP_395793.2|	3.00E-24	PREDICTED: similar to CRSP complex subunit 3 (Cofactor required for Sp1 transcriptional activation subunit 3) (Transcriptional coactivator CRSP130) (Vitamin D3 receptor-interacting protein complex 130 kDa component) (DRIP130) (Activator-recruited cofactor 130... isoform 1 [Apis mellifera]
BT_Q_SG_ZJU_Unigene8660	gi|66522335|ref|XP_391960.2|	9.00E-31	PREDICTED: similar to Mov34 CG3416-PA [Apis mellifera]
BT_Q_SG_ZJU_Unigene8662	gi|156555534|ref|XP_001603205.1|	6.00E-33	PREDICTED: similar to ferrochelatase [Nasonia vitripennis]
BT_Q_SG_ZJU_Unigene8668	gi|156542532|ref|XP_001599934.1|	2.00E-14	PREDICTED: similar to anterior fat body protein [Nasonia vitripennis]
BT_Q_SG_ZJU_Unigene8671	gi|189239068|ref|XP_971434.2|	2.00E-13	PREDICTED: similar to zinc finger protein [Tribolium castaneum]
BT_Q_SG_ZJU_Unigene8677	gi|62722856|gb|AAX94729.1|	6.00E-17	ferritin light chain [Trichoplusia ni]
BT_Q_SG_ZJU_Unigene8680	gi|110763240|ref|XP_001121481.1|	8.00E-14	PREDICTED: similar to mitochondrial ribosomal protein L35 CG13410-PA [Apis mellifera]
BT_Q_SG_ZJU_Unigene8681	gi|193617645|ref|XP_001951109.1|	8.00E-16	PREDICTED: similar to Sas10 CG4202-PA [Acyrthosiphon pisum]
BT_Q_SG_ZJU_Unigene8683	gi|158294912|ref|XP_315898.4|	4.00E-18	AGAP005871-PA [Anopheles gambiae str. PEST] >gi|157015785|gb|EAA11627.4| AGAP005871-PA [Anopheles gambiae str. PEST]
BT_Q_SG_ZJU_Unigene8687	gi|110766155|ref|XP_395739.3|	5.00E-24	PREDICTED: similar to tuberous sclerosis 2 isoform 3 [Apis mellifera]
BT_Q_SG_ZJU_Unigene8688	gi|170051510|ref|XP_001861796.1|	1.00E-15	heat shock factor binding protein [Culex quinquefasciatus] >gi|167872733|gb|EDS36116.1| heat shock factor binding protein [Culex quinquefasciatus]
BT_Q_SG_ZJU_Unigene8694	gi|193704668|ref|XP_001946332.1|	3.00E-38	PREDICTED: similar to spectrin [Acyrthosiphon pisum]
BT_Q_SG_ZJU_Unigene8700	gi|148683290|gb|EDL15237.1|	3.00E-10	mCG17565 [Mus musculus]
BT_Q_SG_ZJU_Unigene8702	gi|157118004|ref|XP_001658961.1|	8.00E-09	cytidylate kinase [Aedes aegypti] >gi|108875897|gb|EAT40122.1| cytidylate kinase [Aedes aegypti]
BT_Q_SG_ZJU_Unigene8708	gi|193620179|ref|XP_001943709.1|	6.00E-12	PREDICTED: similar to phosphatidylserine decarboxylase [Acyrthosiphon pisum]
BT_Q_SG_ZJU_Unigene8710	gi|193678955|ref|XP_001949988.1|	1.00E-19	PREDICTED: similar to Sec61p gamma subunit [Acyrthosiphon pisum]
BT_Q_SG_ZJU_Unigene8714	gi|289741877|gb|ADD19686.1|	9.00E-29	mitochondrial inner membrane protease subunit IMP2 [Glossina morsitans morsitans]
BT_Q_SG_ZJU_Unigene8715	gi|195376263|ref|XP_002046916.1|	1.00E-32	GJ12226 [Drosophila virilis] >gi|194154074|gb|EDW69258.1| GJ12226 [Drosophila virilis]
BT_Q_SG_ZJU_Unigene8717	gi|91081471|ref|XP_967871.1|	5.00E-39	PREDICTED: similar to muscle LIM protein isoform 1 [Tribolium castaneum]
BT_Q_SG_ZJU_Unigene8725	gi|110751363|ref|XP_623196.2|	2.00E-26	PREDICTED: similar to CG8036-PB, isoform B isoform 1 [Apis mellifera]
BT_Q_SG_ZJU_Unigene8732	gi|193699897|ref|XP_001950892.1|	1.00E-23	PREDICTED: similar to CG31694 CG31694-PA [Acyrthosiphon pisum]
BT_Q_SG_ZJU_Unigene8735	gi|301632611|ref|XP_002945375.1|	3.00E-13	PREDICTED: protein tolB-like, partial [Xenopus (Silurana) tropicalis]
BT_Q_SG_ZJU_Unigene8737	gi|170028176|ref|XP_001841972.1|	2.00E-15	glycerol kinase [Culex quinquefasciatus] >gi|167871797|gb|EDS35180.1| glycerol kinase [Culex quinquefasciatus]
BT_Q_SG_ZJU_Unigene8738	gi|156552567|ref|XP_001599465.1|	2.00E-23	PREDICTED: similar to programmed cell death protein 11 (pre-rrna processing protein rrp5) [Nasonia vitripennis]
BT_Q_SG_ZJU_Unigene8744	gi|110765976|ref|XP_623942.2|	2.00E-19	PREDICTED: similar to CG7945-PB, isoform B [Apis mellifera]
BT_Q_SG_ZJU_Unigene8746	gi|118794372|ref|XP_321442.3|	3.00E-36	AGAP001653-PA [Anopheles gambiae str. PEST] >gi|116116265|gb|EAA00921.3| AGAP001653-PA [Anopheles gambiae str. PEST]
BT_Q_SG_ZJU_Unigene8747	gi|110755296|ref|XP_623650.2|	2.00E-24	PREDICTED: similar to CG40191-PB.3 [Apis mellifera]
BT_Q_SG_ZJU_Unigene8752	gi|195381197|ref|XP_002049341.1|	5.00E-22	GJ21531 [Drosophila virilis] >gi|194144138|gb|EDW60534.1| GJ21531 [Drosophila virilis]
BT_Q_SG_ZJU_Unigene8757	gi|118094545|ref|XP_422430.2|	2.00E-20	PREDICTED: similar to LOC496978 protein [Gallus gallus]
BT_Q_SG_ZJU_Unigene8758	gi|91092056|ref|XP_970271.1|	3.00E-18	PREDICTED: similar to dihydropyrimidine dehydrogenase [Tribolium castaneum]
BT_Q_SG_ZJU_Unigene8759	gi|71982926|ref|NP_001021367.1|	1.00E-23	GEX Interacting protein family member (gei-7) [Caenorhabditis elegans] >gi|26251682|gb|AAN84883.1| Gex interacting protein protein 7, isoform b [Caenorhabditis elegans]
BT_Q_SG_ZJU_Unigene8766	gi|195485854|ref|XP_002091261.1|	7.00E-07	GE13554 [Drosophila yakuba] >gi|194177362|gb|EDW90973.1| GE13554 [Drosophila yakuba]
BT_Q_SG_ZJU_Unigene8778	gi|198471193|ref|XP_001355529.2|	2.00E-31	GA15173 [Drosophila pseudoobscura pseudoobscura] >gi|198145808|gb|EAL32588.2| GA15173 [Drosophila pseudoobscura pseudoobscura]
BT_Q_SG_ZJU_Unigene8790	gi|193662232|ref|XP_001948537.1|	1.00E-18	PREDICTED: similar to actin-related protein 2/3 complex subunit 1A [Acyrthosiphon pisum]
BT_Q_SG_ZJU_Unigene8791	gi|156543186|ref|XP_001606131.1|	2.00E-32	PREDICTED: similar to GA18599-PA [Nasonia vitripennis]
BT_Q_SG_ZJU_Unigene8793	gi|119570944|gb|EAW50559.1|	3.00E-26	hCG2042723 [Homo sapiens]
BT_Q_SG_ZJU_Unigene8796	gi|260908522|gb|ACX53980.1|	2.00E-10	acyl-CoA-binding protein [Rhipicephalus sanguineus]
BT_Q_SG_ZJU_Unigene8803	gi|242020915|ref|XP_002430896.1|	4.00E-08	Tuftelin-interacting protein, putative [Pediculus humanus corporis] >gi|212516107|gb|EEB18158.1| Tuftelin-interacting protein, putative [Pediculus humanus corporis]
BT_Q_SG_ZJU_Unigene8804	gi|66566203|ref|XP_623341.1|	3.00E-30	PREDICTED: similar to ataxin 3 isoform 1 isoform 2 [Apis mellifera]
BT_Q_SG_ZJU_Unigene8814	gi|66523748|ref|XP_624861.1|	2.00E-39	PREDICTED: similar to N-myristoyltransferase 1 [Apis mellifera]
BT_Q_SG_ZJU_Unigene8818	gi|121543851|gb|ABM55590.1|	1.00E-24	nucleoplasmin isoform 1-like protein [Maconellicoccus hirsutus]
BT_Q_SG_ZJU_Unigene8821	gi|242016589|ref|XP_002428861.1|	1.00E-07	conserved hypothetical protein [Pediculus humanus corporis] >gi|212513604|gb|EEB16123.1| conserved hypothetical protein [Pediculus humanus corporis]
BT_Q_SG_ZJU_Unigene8825	gi|156537524|ref|XP_001607478.1|	6.00E-17	PREDICTED: similar to ENSANGP00000013869 [Nasonia vitripennis]
BT_Q_SG_ZJU_Unigene8829	gi|91092934|ref|XP_971990.1|	3.00E-32	PREDICTED: similar to CG40042 CG40042-PA [Tribolium castaneum]
BT_Q_SG_ZJU_Unigene8830	gi|94469348|gb|ABF18523.1|	2.00E-26	ferric reductase-like protein [Aedes aegypti]
BT_Q_SG_ZJU_Unigene8839	gi|170059355|ref|XP_001865327.1|	3.00E-10	transforming growth factor beta regulated gene 1 [Culex quinquefasciatus] >gi|167878155|gb|EDS41538.1| transforming growth factor beta regulated gene 1 [Culex quinquefasciatus]
BT_Q_SG_ZJU_Unigene8840	gi|195566355|ref|XP_002106749.1|	7.00E-10	GD17060 [Drosophila simulans] >gi|194204138|gb|EDX17714.1| GD17060 [Drosophila simulans]
BT_Q_SG_ZJU_Unigene8847	gi|148229443|ref|NP_001087677.1|	3.00E-12	lecithin-cholesterol acyltransferase [Xenopus laevis] >gi|51703633|gb|AAH81072.1| MGC82035 protein [Xenopus laevis]
BT_Q_SG_ZJU_Unigene8848	gi|221485770|gb|EEE24040.1|	7.00E-12	16S pseudouridylate synthase, putative [Toxoplasma gondii GT1] >gi|221503852|gb|EEE29536.1| 16S pseudouridylate synthase, putative [Toxoplasma gondii VEG]
BT_Q_SG_ZJU_Unigene8857	gi|194745065|ref|XP_001955013.1|	7.00E-20	GF16461 [Drosophila ananassae] >gi|190628050|gb|EDV43574.1| GF16461 [Drosophila ananassae]
BT_Q_SG_ZJU_Unigene8859	gi|157106535|ref|XP_001649367.1|	4.00E-27	U3 small nucleolar RNA (U3 snorna) associated protein [Aedes aegypti] >gi|108868818|gb|EAT33043.1| U3 small nucleolar RNA (U3 snorna) associated protein [Aedes aegypti]
BT_Q_SG_ZJU_Unigene8861	gi|193636534|ref|XP_001951735.1|	8.00E-11	PREDICTED: similar to CG15432 CG15432-PA [Acyrthosiphon pisum]
BT_Q_SG_ZJU_Unigene8862	gi|157130325|ref|XP_001655662.1|	5.00E-39	peptidyl-prolyl cis-trans isomerase f, ppif [Aedes aegypti] >gi|108871914|gb|EAT36139.1| peptidyl-prolyl cis-trans isomerase f, ppif [Aedes aegypti]
BT_Q_SG_ZJU_Unigene8863	gi|66515345|ref|XP_624761.1|	3.00E-17	PREDICTED: similar to COP9 constitutive photomorphogenic homolog subunit 3 [Apis mellifera]
BT_Q_SG_ZJU_Unigene8864	gi|170047098|ref|XP_001851073.1|	1.00E-16	serine/threonine protein kinase [Culex quinquefasciatus] >gi|167869636|gb|EDS33019.1| serine/threonine protein kinase [Culex quinquefasciatus]
BT_Q_SG_ZJU_Unigene8868	gi|110756904|ref|XP_395309.3|	8.00E-32	PREDICTED: similar to nop5 CG10206-PA [Apis mellifera]
BT_Q_SG_ZJU_Unigene8870	gi|198438337|ref|XP_002126973.1|	1.00E-15	PREDICTED: similar to WD and tetratricopeptide repeats 1 [Ciona intestinalis]
BT_Q_SG_ZJU_Unigene8887	gi|11466531|ref|NP_044780.1|	4.00E-18	ATP synthase F1 subunit alpha [Reclinomonas americana] >gi|2258361|gb|AAD11895.1| ATP synthase F1 subunit alpha [Reclinomonas americana]
BT_Q_SG_ZJU_Unigene8893	gi|229892203|ref|NP_001153520.1|	3.00E-38	heat shock protein cognate 5 [Apis mellifera]
BT_Q_SG_ZJU_Unigene8896	gi|239791517|dbj|BAH72213.1|	6.00E-06	ACYPI004212 [Acyrthosiphon pisum]
BT_Q_SG_ZJU_Unigene8898	gi|156538118|ref|XP_001608230.1|	5.00E-35	PREDICTED: similar to 26S proteasome regulatory subunit rpn2 isoform 2 [Nasonia vitripennis]
BT_Q_SG_ZJU_Unigene8910	gi|193610484|ref|XP_001944733.1|	6.00E-08	PREDICTED: similar to SMEK homolog 1, suppressor of mek1 [Acyrthosiphon pisum]
BT_Q_SG_ZJU_Unigene8926	gi|239790835|dbj|BAH71952.1|	1.00E-16	ACYPI006028 [Acyrthosiphon pisum]
BT_Q_SG_ZJU_Unigene8946	gi|91085843|ref|XP_974961.1|	5.00E-08	PREDICTED: similar to lunapark [Tribolium castaneum]
BT_Q_SG_ZJU_Unigene8953	gi|193715980|ref|XP_001950264.1|	9.00E-15	PREDICTED: similar to trehalase [Acyrthosiphon pisum]
BT_Q_SG_ZJU_Unigene8957	gi|156553745|ref|XP_001601332.1|	1.00E-10	PREDICTED: similar to beta1,4 mannosyltransferase [Nasonia vitripennis]
BT_Q_SG_ZJU_Unigene8958	gi|189234367|ref|XP_974344.2|	9.00E-29	PREDICTED: similar to fibrillin 2 [Tribolium castaneum]
BT_Q_SG_ZJU_Unigene8962	gi|189237047|ref|XP_971519.2|	4.00E-15	PREDICTED: similar to CG14881 CG14881-PA [Tribolium castaneum]
BT_Q_SG_ZJU_Unigene8963	gi|91077850|ref|XP_971897.1|	3.00E-25	PREDICTED: similar to metalloprotease [Tribolium castaneum]
BT_Q_SG_ZJU_Unigene8970	gi|291242221|ref|XP_002741008.1|	1.00E-27	PREDICTED: probable ATP-dependent RNA helicase DDX52-like [Saccoglossus kowalevskii]
BT_Q_SG_ZJU_Unigene8982	gi|156544349|ref|XP_001607337.1|	3.00E-06	PREDICTED: similar to fms interacting protein [Nasonia vitripennis]
BT_Q_SG_ZJU_Unigene8988	gi|170062547|ref|XP_001866716.1|	4.00E-07	HemK methyltransferase family member 1 [Culex quinquefasciatus] >gi|167880450|gb|EDS43833.1| HemK methyltransferase family member 1 [Culex quinquefasciatus]
BT_Q_SG_ZJU_Unigene8992	gi|156551676|ref|XP_001601439.1|	1.00E-40	PREDICTED: similar to beclin [Nasonia vitripennis]
BT_Q_SG_ZJU_Unigene8995	gi|221113525|ref|XP_002168895.1|	2.00E-13	PREDICTED: similar to F59H6.5 [Hydra magnipapillata]
BT_Q_SG_ZJU_Unigene9000	gi|118785995|ref|XP_315053.3|	2.00E-10	AGAP004955-PA [Anopheles gambiae str. PEST] >gi|116127674|gb|EAA10357.3| AGAP004955-PA [Anopheles gambiae str. PEST]
BT_Q_SG_ZJU_Unigene9003	gi|237843017|ref|XP_002370806.1|	4.00E-08	1-deoxy-D-xylulose 5-phosphate reductoisomerase, putative [Toxoplasma gondii ME49] >gi|211968470|gb|EEB03666.1| 1-deoxy-D-xylulose 5-phosphate reductoisomerase, putative [Toxoplasma gondii ME49]
BT_Q_SG_ZJU_Unigene9005	gi|156539959|ref|XP_001599129.1|	9.00E-23	PREDICTED: similar to ENSANGP00000013457 [Nasonia vitripennis]
BT_Q_SG_ZJU_Unigene9006	gi|66504340|ref|XP_623690.1|	1.00E-24	PREDICTED: similar to Cathepsin O precursor [Apis mellifera]
BT_Q_SG_ZJU_Unigene9013	gi|291228224|ref|XP_002734079.1|	2.00E-07	PREDICTED: CT054 protein-like [Saccoglossus kowalevskii]
BT_Q_SG_ZJU_Unigene9017	gi|189237111|ref|XP_971520.2|	2.00E-30	PREDICTED: similar to glycyl-tRNA synthetase [Tribolium castaneum]
BT_Q_SG_ZJU_Unigene9021	gi|156542355|ref|XP_001600328.1|	7.00E-20	PREDICTED: similar to ENSANGP00000014283 [Nasonia vitripennis]
BT_Q_SG_ZJU_Unigene9024	gi|189094119|gb|ACD75887.1|	5.00E-31	enolase [Chauliognathus opacus]
BT_Q_SG_ZJU_Unigene9030	gi|110763449|ref|XP_395195.3|	1.00E-27	PREDICTED: similar to bromodomain containing 8 [Apis mellifera]
BT_Q_SG_ZJU_Unigene9050	gi|189237082|ref|XP_001810630.1|	1.00E-18	PREDICTED: similar to CG14722 CG14722-PA [Tribolium castaneum]
BT_Q_SG_ZJU_Unigene9052	gi|158300099|ref|XP_320089.2|	3.00E-36	AGAP009291-PA [Anopheles gambiae str. PEST] >gi|157013838|gb|EAA14827.2| AGAP009291-PA [Anopheles gambiae str. PEST]
BT_Q_SG_ZJU_Unigene9053	gi|170044466|ref|XP_001849867.1|	9.00E-10	F-box and leucine-rich repeat protein 11 [Culex quinquefasciatus] >gi|167867607|gb|EDS30990.1| F-box and leucine-rich repeat protein 11 [Culex quinquefasciatus]
BT_Q_SG_ZJU_Unigene9056	gi|170028512|ref|XP_001842139.1|	5.00E-13	aq_284 [Culex quinquefasciatus] >gi|167876261|gb|EDS39644.1| aq_284 [Culex quinquefasciatus]
BT_Q_SG_ZJU_Unigene9059	gi|91078482|ref|XP_975769.1|	7.00E-10	PREDICTED: similar to AGAP006099-PA isoform 2 [Tribolium castaneum]
BT_Q_SG_ZJU_Unigene9060	gi|193645819|ref|XP_001943033.1|	5.00E-06	PREDICTED: similar to GA21079-PA [Acyrthosiphon pisum]
BT_Q_SG_ZJU_Unigene9066	gi|221128021|ref|XP_002154898.1|	8.00E-14	PREDICTED: similar to DNA-directed RNA polymerase beta chain [Hydra magnipapillata]
BT_Q_SG_ZJU_Unigene9067	gi|110767770|ref|XP_624812.2|	1.00E-41	PREDICTED: similar to CG5682-PA, partial [Apis mellifera]
BT_Q_SG_ZJU_Unigene9068	gi|62869876|gb|AAY18083.1|	4.00E-16	interleukin enhancer binding factor 2 [Tetraodon nigroviridis]
BT_Q_SG_ZJU_Unigene9071	gi|48109169|ref|XP_396222.1|	3.00E-09	PREDICTED: similar to CG6353-PA [Apis mellifera]
BT_Q_SG_ZJU_Unigene9072	gi|291461573|dbj|BAI83421.1|	1.00E-11	sugar transporter 7 [Nilaparvata lugens]
BT_Q_SG_ZJU_Unigene9086	gi|195132841|ref|XP_002010848.1|	5.00E-22	GI21480 [Drosophila mojavensis] >gi|193907636|gb|EDW06503.1| GI21480 [Drosophila mojavensis]
BT_Q_SG_ZJU_Unigene9087	gi|239789843|dbj|BAH71520.1|	2.00E-30	ACYPI001763 [Acyrthosiphon pisum]
BT_Q_SG_ZJU_Unigene9095	gi|193584719|ref|XP_001952537.1|	2.00E-23	PREDICTED: similar to Pseudouridylate synthase 7 homolog [Acyrthosiphon pisum]
BT_Q_SG_ZJU_Unigene9096	gi|91091652|ref|XP_971071.1|	1.00E-24	PREDICTED: similar to mitochondrial processing peptidase alpha subunit [Tribolium castaneum]
BT_Q_SG_ZJU_Unigene9101	gi|291398713|ref|XP_002715973.1|	8.00E-14	PREDICTED: leucine rich repeat containing 40 [Oryctolagus cuniculus]
BT_Q_SG_ZJU_Unigene9107	gi|94469022|gb|ABF18360.1|	1.00E-16	mitochondrial NADH-ubiquinone oxidoreductase 9 kDa subunit-like protein [Aedes aegypti]
BT_Q_SG_ZJU_Unigene9109	gi|222087973|gb|ACM41849.1|	5.00E-10	DnaJ subfamily C member 2 [Epinephelus coioides]
BT_Q_SG_ZJU_Unigene9111	gi|194758487|ref|XP_001961493.1|	1.00E-26	GF14996 [Drosophila ananassae] >gi|292630671|sp|B3MLC5.1|DRE2_DROAN RecName: Full=Anamorsin homolog; AltName: Full=Fe-S cluster assembly protein DRE2 homolog >gi|190615190|gb|EDV30714.1| GF14996 [Drosophila ananassae]
BT_Q_SG_ZJU_Unigene9114	gi|218083874|ref|NP_001136160.1|	3.00E-11	vesicle transport through interaction with t-SNAREs homolog 1A-like [Nasonia vitripennis]
BT_Q_SG_ZJU_Unigene9115	gi|237874213|ref|NP_001153863.1|	4.00E-35	Obg-like ATPase 1 [Acyrthosiphon pisum] >gi|239788262|dbj|BAH70819.1| ACYPI52009 [Acyrthosiphon pisum] >gi|239788264|dbj|BAH70820.1| ACYPI52009 [Acyrthosiphon pisum] >gi|239788266|dbj|BAH70821.1| ACYPI52009 [Acyrthosiphon pisum] >gi|239788268|dbj|BAH70822.1| ACYPI52009 [Acyrthosiphon pisum] >gi|239788270|dbj|BAH70823.1| ACYPI52009 [Acyrthosiphon pisum] >gi|239788272|dbj|BAH70824.1| ACYPI52009 [Ac…
BT_Q_SG_ZJU_Unigene9116	gi|239947120|ref|ZP_04698873.1|	5.00E-34	succinate dehydrogenase, flavoprotein subunit [Rickettsia endosymbiont of Ixodes scapularis] >gi|239921396|gb|EER21420.1| succinate dehydrogenase, flavoprotein subunit [Rickettsia endosymbiont of Ixodes scapularis]
BT_Q_SG_ZJU_Unigene9117	gi|118795048|ref|XP_321892.3|	7.00E-34	AGAP001257-PA [Anopheles gambiae str. PEST] >gi|116116589|gb|EAA43227.3| AGAP001257-PA [Anopheles gambiae str. PEST]
BT_Q_SG_ZJU_Unigene9120	gi|193662291|ref|XP_001946780.1|	9.00E-10	PREDICTED: similar to CG8366 CG8366-PA [Acyrthosiphon pisum]
BT_Q_SG_ZJU_Unigene9130	gi|162952028|ref|NP_001106141.1|	9.00E-18	trehalase precursor [Apis mellifera] >gi|166231328|sp|A8J4S9.1|TREA_APIME RecName: Full=Trehalase; AltName: Full=Alpha,alpha-trehalase; AltName: Full=Alpha,alpha-trehalose glucohydrolase; Flags: Precursor >gi|157940209|dbj|BAF81545.1| trehalase [Apis mellifera]
BT_Q_SG_ZJU_Unigene9140	gi|239788029|dbj|BAH70711.1|	7.00E-31	ACYPI002479 [Acyrthosiphon pisum]
BT_Q_SG_ZJU_Unigene9143	gi|193587410|ref|XP_001947666.1|	4.00E-17	PREDICTED: similar to AGAP007665-PA [Acyrthosiphon pisum]
BT_Q_SG_ZJU_Unigene9150	gi|239789592|dbj|BAH71411.1|	2.00E-07	ACYPI007390 [Acyrthosiphon pisum]
BT_Q_SG_ZJU_Unigene9157	gi|193606015|ref|XP_001942911.1|	8.00E-27	PREDICTED: similar to Choline/ethanolamine kinase [Acyrthosiphon pisum]
BT_Q_SG_ZJU_Unigene9159	gi|114051710|ref|NP_001040326.1|	3.00E-12	mitochondrial prohibitin complex protein 2 [Bombyx mori] >gi|87248567|gb|ABD36336.1| mitochondrial prohibitin complex protein 2 [Bombyx mori]
BT_Q_SG_ZJU_Unigene9161	gi|195397581|ref|XP_002057407.1|	2.00E-19	GJ16359 [Drosophila virilis] >gi|194147174|gb|EDW62893.1| GJ16359 [Drosophila virilis]
BT_Q_SG_ZJU_Unigene9168	gi|51010917|ref|NP_001003413.1|	6.00E-06	tryptophan-rich protein [Danio rerio] >gi|292621287|ref|XP_002664598.1| PREDICTED: tryptophan-rich protein-like [Danio rerio] >gi|82085457|sp|Q6DRM0.1|WRB_DANRE RecName: Full=Tryptophan-rich protein >gi|49618945|gb|AAT68057.1| pinball wizard [Danio rerio] >gi|152012609|gb|AAI50354.1| Tryptophan rich basic protein [Danio rerio]
BT_Q_SG_ZJU_Unigene9172	gi|110757630|ref|XP_394861.3|	1.00E-12	PREDICTED: similar to CG3106-PA [Apis mellifera]
BT_Q_SG_ZJU_Unigene9180	gi|91081717|ref|XP_971518.1|	4.00E-13	PREDICTED: similar to F35D11.4 [Tribolium castaneum]
BT_Q_SG_ZJU_Unigene9185	gi|91086455|ref|XP_969418.1|	1.00E-13	PREDICTED: similar to CG18041 CG18041-PA [Tribolium castaneum]
BT_Q_SG_ZJU_Unigene9189	gi|189237595|ref|XP_966729.2|	7.00E-31	PREDICTED: similar to 5-aminolevulinic acid synthase [Tribolium castaneum]
BT_Q_SG_ZJU_Unigene9192	gi|195131953|ref|XP_002010408.1|	1.00E-10	GI14698 [Drosophila mojavensis] >gi|193908858|gb|EDW07725.1| GI14698 [Drosophila mojavensis]
BT_Q_SG_ZJU_Unigene9209	gi|91085437|ref|XP_968834.1|	7.00E-18	PREDICTED: similar to early embryogenesis protein zyg-11 like, ZYGote defective : embryonic lethal ZYG-11 (90.8 kD) (zyg-11) [Tribolium castaneum]
BT_Q_SG_ZJU_Unigene9212	gi|190702506|gb|ACE75391.1|	5.00E-18	cation-transporting ATPase [Glyptapanteles indiensis]
BT_Q_SG_ZJU_Unigene9224	gi|156545277|ref|XP_001605193.1|	4.00E-20	PREDICTED: similar to calpain [Nasonia vitripennis]
BT_Q_SG_ZJU_Unigene9225	gi|193587428|ref|XP_001949780.1|	9.00E-31	PREDICTED: similar to gamma-coatomer protein CG1528-PA [Acyrthosiphon pisum]
BT_Q_SG_ZJU_Unigene9226	gi|156542793|ref|XP_001605959.1|	7.00E-20	PREDICTED: similar to 26S proteasome regulatory subunit S3 [Nasonia vitripennis]
BT_Q_SG_ZJU_Unigene9228	gi|110763455|ref|XP_001120410.1|	1.00E-16	PREDICTED: similar to anaphase promoting complex subunit 13 [Apis mellifera]
BT_Q_SG_ZJU_Unigene9238	gi|291386173|ref|XP_002710050.1|	4.00E-07	PREDICTED: major facilitator superfamily domain containing 9-like [Oryctolagus cuniculus]
BT_Q_SG_ZJU_Unigene9239	gi|156547665|ref|XP_001604514.1|	4.00E-28	PREDICTED: similar to ENSANGP00000010644 [Nasonia vitripennis]
BT_Q_SG_ZJU_Unigene9242	gi|125743142|gb|ABN54493.1|	7.00E-12	conserved protein [Oncopeltus fasciatus]
BT_Q_SG_ZJU_Unigene9248	gi|291234185|ref|XP_002737027.1|	6.00E-22	PREDICTED: CG15141-like [Saccoglossus kowalevskii]
BT_Q_SG_ZJU_Unigene9250	gi|156555010|ref|XP_001603083.1|	2.00E-26	PREDICTED: similar to sorting nexin [Nasonia vitripennis]
BT_Q_SG_ZJU_Unigene9251	gi|291239071|ref|XP_002739449.1|	1.00E-16	PREDICTED: hypothetical protein [Saccoglossus kowalevskii]
BT_Q_SG_ZJU_Unigene9252	gi|193584719|ref|XP_001952537.1|	4.00E-08	PREDICTED: similar to Pseudouridylate synthase 7 homolog [Acyrthosiphon pisum]
BT_Q_SG_ZJU_Unigene9254	gi|195030452|ref|XP_001988082.1|	1.00E-12	GH10973 [Drosophila grimshawi] >gi|193904082|gb|EDW02949.1| GH10973 [Drosophila grimshawi]
BT_Q_SG_ZJU_Unigene9256	gi|301298989|gb|ADK66838.1|	2.00E-45	actin [Hypsibius klebelsbergi]
BT_Q_SG_ZJU_Unigene9267	gi|241568978|ref|XP_002402619.1|	1.00E-06	conserved hypothetical protein [Ixodes scapularis] >gi|215500060|gb|EEC09554.1| conserved hypothetical protein [Ixodes scapularis]
BT_Q_SG_ZJU_Unigene9280	gi|91078414|ref|XP_974638.1|	1.00E-16	PREDICTED: similar to huntingtin-interacting protein HYPK [Tribolium castaneum]
BT_Q_SG_ZJU_Unigene9285	gi|156538144|ref|XP_001608266.1|	2.00E-11	PREDICTED: similar to 16 kDa salivary protein [Nasonia vitripennis]
BT_Q_SG_ZJU_Unigene9289	gi|189235835|ref|XP_967696.2|	9.00E-29	PREDICTED: similar to AGAP005431-PA [Tribolium castaneum]
BT_Q_SG_ZJU_Unigene9294	gi|15292611|gb|AAK93574.1|	8.00E-30	SD10981p [Drosophila melanogaster]
BT_Q_SG_ZJU_Unigene9296	gi|156554978|ref|XP_001602553.1|	2.00E-26	PREDICTED: similar to ENSANGP00000028298 [Nasonia vitripennis]
BT_Q_SG_ZJU_Unigene9297	gi|66558942|ref|XP_623672.1|	5.00E-13	PREDICTED: similar to CG5525-PA isoform 1 [Apis mellifera]
BT_Q_SG_ZJU_Unigene9302	gi|118777462|ref|XP_308086.3|	7.00E-17	AGAP011050-PA [Anopheles gambiae str. PEST] >gi|116132724|gb|EAA45511.3| AGAP011050-PA [Anopheles gambiae str. PEST]
BT_Q_SG_ZJU_Unigene9308	gi|91091362|ref|XP_972603.1|	7.00E-13	PREDICTED: similar to lethal 35Di [Tribolium castaneum]
BT_Q_SG_ZJU_Unigene9311	gi|209730800|gb|ACI66269.1|	9.00E-34	Glyceraldehyde-3-phosphate dehydrogenase [Salmo salar]
BT_Q_SG_ZJU_Unigene9315	gi|189235888|ref|XP_966890.2|	6.00E-06	PREDICTED: similar to fidipidine [Tribolium castaneum]
BT_Q_SG_ZJU_Unigene9318	gi|198453330|ref|XP_001359153.2|	4.00E-33	GA19329 [Drosophila pseudoobscura pseudoobscura] >gi|198132313|gb|EAL28297.2| GA19329 [Drosophila pseudoobscura pseudoobscura]
BT_Q_SG_ZJU_Unigene9324	gi|193603340|ref|XP_001942960.1|	2.00E-11	PREDICTED: similar to TBC domain-containing protein kinase-like protein [Acyrthosiphon pisum]
BT_Q_SG_ZJU_Unigene9330	gi|225708574|gb|ACO10133.1|	6.00E-20	NADP-dependent leukotriene B4 12-hydroxydehydrogenase [Osmerus mordax]
BT_Q_SG_ZJU_Unigene9332	gi|66566223|ref|XP_397449.2|	9.00E-15	PREDICTED: similar to CG7015-PA [Apis mellifera]
BT_Q_SG_ZJU_Unigene9349	gi|193575625|ref|XP_001942849.1|	4.00E-25	PREDICTED: similar to zinc finger protein 403 [Acyrthosiphon pisum]
BT_Q_SG_ZJU_Unigene9356	gi|221128031|ref|XP_002155059.1|	1.00E-40	PREDICTED: similar to Translation elongation factor, mitochondrial [Hydra magnipapillata]
BT_Q_SG_ZJU_Unigene9361	gi|157817386|ref|NP_001101685.1|	2.00E-11	major facilitator superfamily domain-containing protein 9 [Rattus norvegicus]
BT_Q_SG_ZJU_Unigene9367	gi|195056231|ref|XP_001995015.1|	8.00E-22	GH22871 [Drosophila grimshawi] >gi|193899221|gb|EDV98087.1| GH22871 [Drosophila grimshawi]
BT_Q_SG_ZJU_Unigene9369	gi|194756878|ref|XP_001960697.1|	3.00E-06	GF13482 [Drosophila ananassae] >gi|190621995|gb|EDV37519.1| GF13482 [Drosophila ananassae]
BT_Q_SG_ZJU_Unigene9375	gi|48097144|ref|XP_393701.1|	5.00E-22	PREDICTED: similar to Signal peptidase complex subunit 2 (Microsomal signal peptidase 25 kDa subunit) (SPase 25 kDa subunit) [Apis mellifera]
BT_Q_SG_ZJU_Unigene9376	gi|193603681|ref|XP_001949325.1|	6.00E-35	PREDICTED: similar to AGAP007784-PA [Acyrthosiphon pisum]
BT_Q_SG_ZJU_Unigene9380	gi|91076194|ref|XP_971998.1|	8.00E-24	PREDICTED: similar to caseinolytic protease, ATP-dependent, proteolytic subunit homolog [Tribolium castaneum]
BT_Q_SG_ZJU_Unigene9388	gi|301631835|ref|XP_002945000.1|	1.00E-30	PREDICTED: cytochrome o ubiquinol oxidase subunit 3-like [Xenopus (Silurana) tropicalis]
BT_Q_SG_ZJU_Unigene9390	gi|193586911|ref|XP_001950325.1|	6.00E-32	PREDICTED: similar to neurotransmitter gated ion channel [Acyrthosiphon pisum]
BT_Q_SG_ZJU_Unigene9396	gi|91077026|ref|XP_967151.1|	2.00E-27	PREDICTED: similar to AGAP000682-PA [Tribolium castaneum]
BT_Q_SG_ZJU_Unigene9397	gi|193613354|ref|XP_001943445.1|	2.00E-42	PREDICTED: similar to AGAP008127-PA [Acyrthosiphon pisum]
BT_Q_SG_ZJU_Unigene9398	gi|157132474|ref|XP_001662580.1|	2.00E-13	organic cation transporter [Aedes aegypti] >gi|108871164|gb|EAT35389.1| organic cation transporter [Aedes aegypti]
BT_Q_SG_ZJU_Unigene9399	gi|110764331|ref|XP_392880.3|	3.00E-30	PREDICTED: similar to acid alpha-glucosidase [Apis mellifera]
BT_Q_SG_ZJU_Unigene9402	gi|157112332|ref|XP_001657500.1|	1.00E-18	elongation factor 1-beta2 [Aedes aegypti] >gi|108883773|gb|EAT47998.1| elongation factor 1-beta2 [Aedes aegypti]
BT_Q_SG_ZJU_Unigene9409	gi|66509994|ref|XP_625200.1|	5.00E-18	PREDICTED: similar to Nedd8 CG10679-PA [Apis mellifera] >gi|156541904|ref|XP_001599314.1| PREDICTED: similar to ENSANGP00000010151 [Nasonia vitripennis]
BT_Q_SG_ZJU_Unigene9411	gi|256070554|ref|XP_002571608.1|	5.00E-18	leucyl-tRNA synthetase [Schistosoma mansoni]
BT_Q_SG_ZJU_Unigene9412	gi|193664416|ref|XP_001949762.1|	3.00E-12	PREDICTED: similar to Lipid storage droplet-1 CG10374-PC [Acyrthosiphon pisum]
BT_Q_SG_ZJU_Unigene9414	gi|91077554|ref|XP_972108.1|	2.00E-23	PREDICTED: similar to AGAP010450-PA [Tribolium castaneum]
BT_Q_SG_ZJU_Unigene9422	gi|156543772|ref|XP_001606233.1|	1.00E-20	PREDICTED: similar to CG7888-PB [Nasonia vitripennis]
BT_Q_SG_ZJU_Unigene9431	gi|91091294|ref|XP_970147.1|	1.00E-34	PREDICTED: similar to AGAP001802-PA [Tribolium castaneum]
BT_Q_SG_ZJU_Unigene9446	gi|183231155|ref|XP_648734.2|	4.00E-19	Orn/Arg/Lys decarboxylase [Entamoeba histolytica HM-1:IMSS]
BT_Q_SG_ZJU_Unigene9448	gi|156549292|ref|XP_001600155.1|	1.00E-30	PREDICTED: similar to LOC398480 protein [Nasonia vitripennis]
BT_Q_SG_ZJU_Unigene9453	gi|66551405|ref|XP_396624.2|	3.00E-16	PREDICTED: similar to THO complex 3 [Apis mellifera]
BT_Q_SG_ZJU_Unigene9459	gi|193580043|ref|XP_001945586.1|	6.00E-06	PREDICTED: hypothetical protein [Acyrthosiphon pisum]
BT_Q_SG_ZJU_Unigene9460	gi|148271075|ref|NP_032692.2|	2.00E-08	myelin transcription factor 1-like protein isoform 2 [Mus musculus] >gi|148271079|ref|NP_001087245.1| myelin transcription factor 1-like protein isoform 2 [Mus musculus]
BT_Q_SG_ZJU_Unigene9461	gi|38047779|gb|AAR09792.1|	3.00E-14	similar to Drosophila melanogaster eIF-5A [Drosophila yakuba]
BT_Q_SG_ZJU_Unigene9464	gi|219524769|gb|ACL14949.1|	6.00E-27	nicotinic acetylcholine receptor Nla6 subunit [Nilaparvata lugens]
BT_Q_SG_ZJU_Unigene9468	gi|66507476|ref|XP_392350.2|	5.00E-15	PREDICTED: similar to Hexokinase A CG3001-PA, isoform A [Apis mellifera]
BT_Q_SG_ZJU_Unigene9480	gi|198420753|ref|XP_002124790.1|	8.00E-06	PREDICTED: similar to transmembrane protein 214 [Ciona intestinalis]
BT_Q_SG_ZJU_Unigene9483	gi|66519672|ref|XP_393828.2|	9.00E-07	PREDICTED: similar to katanin p80 (WD40-containing) subunit B 1 [Apis mellifera]
BT_Q_SG_ZJU_Unigene9485	gi|193610690|ref|XP_001950359.1|	3.00E-13	PREDICTED: similar to juvenile hormone esterase [Acyrthosiphon pisum]
BT_Q_SG_ZJU_Unigene9491	gi|263173488|gb|ACY69952.1|	8.00E-24	uncharacterized conserved protein [Cimex lectularius]
BT_Q_SG_ZJU_Unigene9495	gi|193716086|ref|XP_001952519.1|	4.00E-08	PREDICTED: similar to gamma-glutamyltranspeptidase-like protein [Acyrthosiphon pisum]
BT_Q_SG_ZJU_Unigene9497	gi|112984362|ref|NP_001037516.1|	4.00E-15	eukaryotic translation initiation factor 2 alpha subunit [Bombyx mori] >gi|66736329|gb|AAY54260.1| eukaryotic translation initiation factor 2 alpha subunit [Bombyx mori]
BT_Q_SG_ZJU_Unigene9505	gi|289743371|gb|ADD20433.1|	4.00E-24	eukaryotic translation initiation factor 3 subunit 2 beta [Glossina morsitans morsitans]
BT_Q_SG_ZJU_Unigene9506	gi|193697490|ref|XP_001945902.1|	4.00E-40	PREDICTED: similar to protein phosphatase 1, catalytic subunit, alpha [Acyrthosiphon pisum]
BT_Q_SG_ZJU_Unigene9515	gi|198139671|gb|ACH81781.1|	1.00E-13	fructose 1,6-bisphosphate aldolase [Artemia franciscana]
BT_Q_SG_ZJU_Unigene9516	gi|263173502|gb|ACY69956.1|	6.00E-37	mitochondrial phosphate carrier protein [Cimex lectularius]
BT_Q_SG_ZJU_Unigene9522	gi|53828415|dbj|BAD54748.1|	2.00E-23	ABC membrane transporter [Athalia rosae]
BT_Q_SG_ZJU_Unigene9525	gi|91094389|ref|XP_971252.1|	6.00E-09	PREDICTED: similar to NC2alpha CG10318-PA [Tribolium castaneum]
BT_Q_SG_ZJU_Unigene9530	gi|301629969|ref|XP_002944104.1|	6.00E-38	PREDICTED: threonyl-tRNA synthetase-like [Xenopus (Silurana) tropicalis]
BT_Q_SG_ZJU_Unigene9533	gi|270011090|gb|EFA07538.1|	5.00E-26	Fas (TNFRSF6) associated factor 1 [Tribolium castaneum]
BT_Q_SG_ZJU_Unigene9534	gi|110760718|ref|XP_001120607.1|	2.00E-18	PREDICTED: similar to LSM5 homolog, U6 small nuclear RNA associated [Apis mellifera]
BT_Q_SG_ZJU_Unigene9540	gi|195129173|ref|XP_002009033.1|	8.00E-16	GI13825 [Drosophila mojavensis] >gi|193920642|gb|EDW19509.1| GI13825 [Drosophila mojavensis]
BT_Q_SG_ZJU_Unigene9550	gi|91081659|ref|XP_969257.1|	9.00E-13	PREDICTED: similar to Bekka CG4539-PA [Tribolium castaneum]
BT_Q_SG_ZJU_Unigene9556	gi|193587085|ref|XP_001947872.1|	5.00E-14	PREDICTED: similar to helicase [Acyrthosiphon pisum]
BT_Q_SG_ZJU_Unigene9559	gi|156554114|ref|XP_001601087.1|	9.00E-10	PREDICTED: similar to cAMP-dependent protein kinase type II regulatory chain [Nasonia vitripennis]
BT_Q_SG_ZJU_Unigene9563	gi|34484231|gb|AAQ72750.1|	1.00E-45	sodium/potassium ATPase alpha subunit [Doru lineare]
BT_Q_SG_ZJU_Unigene9576	gi|193671530|ref|XP_001950255.1|	1.00E-39	PREDICTED: similar to eukaryotic translation initiation factor 3 subunit 7, partial [Acyrthosiphon pisum]
BT_Q_SG_ZJU_Unigene9577	gi|224046949|ref|XP_002199564.1|	4.00E-10	PREDICTED: similar to tRNA methyltransferase 6 [Taeniopygia guttata]
BT_Q_SG_ZJU_Unigene9585	gi|193606183|ref|XP_001948183.1|	1.00E-22	PREDICTED: similar to GA21044-PA [Acyrthosiphon pisum]
BT_Q_SG_ZJU_Unigene9589	gi|189237082|ref|XP_001810630.1|	9.00E-18	PREDICTED: similar to CG14722 CG14722-PA [Tribolium castaneum]
BT_Q_SG_ZJU_Unigene9593	gi|301631547|ref|XP_002944859.1|	3.00E-16	PREDICTED: 30S ribosomal protein S7-like [Xenopus (Silurana) tropicalis]
BT_Q_SG_ZJU_Unigene9598	gi|121543811|gb|ABM55570.1|	3.00E-23	Bax inhibitor 1-like protein [Maconellicoccus hirsutus]
BT_Q_SG_ZJU_Unigene9604	gi|156548362|ref|XP_001603752.1|	2.00E-21	PREDICTED: similar to SJCHGC05576 protein [Nasonia vitripennis]
BT_Q_SG_ZJU_Unigene9605	gi|156543060|ref|XP_001604662.1|	5.00E-32	PREDICTED: similar to alpha-glucosidase [Nasonia vitripennis]
BT_Q_SG_ZJU_Unigene9614	gi|156542785|ref|XP_001605379.1|	7.00E-26	PREDICTED: similar to Bax inhibitor-1-like protein [Nasonia vitripennis]
BT_Q_SG_ZJU_Unigene9616	gi|260908182|gb|ACX54094.1|	1.00E-20	CREB isoform 2 [Lariophagus distinguendus] >gi|260908187|gb|ACX54097.1| CREB isoform 2 [Lariophagus distinguendus]
BT_Q_SG_ZJU_Unigene9625	gi|301632277|ref|XP_002945217.1|	2.00E-11	PREDICTED: peptide deformylase 1-like [Xenopus (Silurana) tropicalis]
BT_Q_SG_ZJU_Unigene9632	gi|91079883|ref|XP_967733.1|	3.00E-17	PREDICTED: similar to ubiquitin carboxyl-terminal hydrolase isozyme L5 [Tribolium castaneum]
BT_Q_SG_ZJU_Unigene9643	gi|301630238|ref|XP_002944229.1|	6.00E-13	PREDICTED: glutamine transport ATP-binding protein glnQ-like [Xenopus (Silurana) tropicalis]
BT_Q_SG_ZJU_Unigene9645	gi|149585621|ref|XP_001518513.1|	1.00E-06	PREDICTED: similar to LRRG00134, partial [Ornithorhynchus anatinus]
BT_Q_SG_ZJU_Unigene9647	gi|158302285|ref|XP_321862.3|	2.00E-14	AGAP001285-PA [Anopheles gambiae str. PEST] >gi|157012876|gb|EAA01777.4| AGAP001285-PA [Anopheles gambiae str. PEST]
BT_Q_SG_ZJU_Unigene9648	gi|91085415|ref|XP_967672.1|	2.00E-23	PREDICTED: similar to CG11166 CG11166-PD [Tribolium castaneum]
BT_Q_SG_ZJU_Unigene9649	gi|281205149|gb|EFA79342.1|	1.00E-22	acetylornithine transaminase [Polysphondylium pallidum PN500]
BT_Q_SG_ZJU_Unigene9656	gi|55925219|ref|NP_001007344.1|	2.00E-13	sorting and assembly machinery component 50 homolog B [Danio rerio] >gi|82179907|sp|Q5U3I0.1|SAM5B_DANRE RecName: Full=Sorting and assembly machinery component 50 homolog B >gi|55250654|gb|AAH85536.1| Sorting and assembly machinery component 50 homolog, like [Danio rerio]
BT_Q_SG_ZJU_Unigene9658	gi|91080663|ref|XP_974713.1|	2.00E-49	PREDICTED: similar to Noa36 CG10009-PA [Tribolium castaneum]
BT_Q_SG_ZJU_Unigene9664	gi|4588085|gb|AAD25980.1|AF095770_1	5.00E-11	PTH-responsive osteosarcoma D1 protein [Homo sapiens]
BT_Q_SG_ZJU_Unigene9665	gi|195441308|ref|XP_002068455.1|	1.00E-13	GK20412 [Drosophila willistoni] >gi|194164540|gb|EDW79441.1| GK20412 [Drosophila willistoni]
BT_Q_SG_ZJU_Unigene9667	gi|53830714|gb|AAU95200.1|	7.00E-44	enolase [Oncometopia nigricans]
BT_Q_SG_ZJU_Unigene9668	gi|268531974|ref|XP_002631115.1|	1.00E-07	C. briggsae CBR-RSP-1 protein [Caenorhabditis briggsae] >gi|187037045|emb|CAP23711.1| C. briggsae CBR-RSP-1 protein [Caenorhabditis briggsae]
BT_Q_SG_ZJU_Unigene9669	gi|301781859|ref|XP_002926345.1|	3.00E-49	PREDICTED: mitogen-activated protein kinase 1-like [Ailuropoda melanoleuca]
BT_Q_SG_ZJU_Unigene9674	gi|91077326|ref|XP_974776.1|	3.00E-17	PREDICTED: similar to GA19292-PA [Tribolium castaneum]
BT_Q_SG_ZJU_Unigene9678	gi|156554158|ref|XP_001599489.1|	7.00E-09	PREDICTED: similar to survival of motor neuron 1, telomeric [Nasonia vitripennis]
BT_Q_SG_ZJU_Unigene9679	gi|193624978|ref|XP_001946538.1|	3.00E-31	PREDICTED: similar to AGAP010728-PA [Acyrthosiphon pisum]
BT_Q_SG_ZJU_Unigene9688	gi|193711453|ref|XP_001950896.1|	6.00E-25	PREDICTED: similar to lola, partial [Acyrthosiphon pisum]
BT_Q_SG_ZJU_Unigene9691	gi|118097622|ref|XP_414663.2|	9.00E-28	PREDICTED: similar to Leucyl-tRNA synthetase, cytoplasmic (Leucine--tRNA ligase) (LeuRS) [Gallus gallus]
BT_Q_SG_ZJU_Unigene9692	gi|193671789|ref|XP_001945619.1|	6.00E-24	PREDICTED: similar to lysocardiolipin acyltransferase [Acyrthosiphon pisum]
BT_Q_SG_ZJU_Unigene9696	gi|159155711|gb|AAI54776.1|	4.00E-07	Pla2g15 protein [Danio rerio]
BT_Q_SG_ZJU_Unigene9700	gi|239789456|dbj|BAH71353.1|	4.00E-09	ACYPI008046 [Acyrthosiphon pisum]
BT_Q_SG_ZJU_Unigene9709	gi|3127936|emb|CAA06690.1|	3.00E-26	nuclear receptor [Tenebrio molitor]
BT_Q_SG_ZJU_Unigene9714	gi|193589524|ref|XP_001950629.1|	3.00E-10	PREDICTED: hypothetical protein, partial [Acyrthosiphon pisum]
BT_Q_SG_ZJU_Unigene9716	gi|158263254|gb|ABW24383.1|	7.00E-07	cytochrome c oxidase subunit VIc [Riftia pachyptila]
BT_Q_SG_ZJU_Unigene9724	gi|193610500|ref|XP_001946702.1|	3.00E-30	PREDICTED: similar to GA18834-PA [Acyrthosiphon pisum]
BT_Q_SG_ZJU_Unigene9726	gi|158289654|ref|XP_311336.3|	1.00E-40	AGAP000794-PA [Anopheles gambiae str. PEST] >gi|157018621|gb|EAA06952.3| AGAP000794-PA [Anopheles gambiae str. PEST]
BT_Q_SG_ZJU_Unigene9727	gi|170032710|ref|XP_001844223.1|	2.00E-14	TFIIA [Culex quinquefasciatus] >gi|167873053|gb|EDS36436.1| TFIIA [Culex quinquefasciatus]
BT_Q_SG_ZJU_Unigene9731	gi|193603364|ref|XP_001946084.1|	2.00E-07	PREDICTED: similar to lysosomal-associated transmembrane protein [Acyrthosiphon pisum]
BT_Q_SG_ZJU_Unigene9741	gi|198461141|ref|XP_002135891.1|	1.00E-07	GA22538 [Drosophila pseudoobscura pseudoobscura] >gi|198139679|gb|EDY70778.1| GA22538 [Drosophila pseudoobscura pseudoobscura]
BT_Q_SG_ZJU_Unigene9743	gi|91089491|ref|XP_969723.1|	2.00E-40	PREDICTED: similar to U6 snRNA-associated Sm-like protein [Tribolium castaneum]
BT_Q_SG_ZJU_Unigene9748	gi|91078258|ref|XP_970899.1|	9.00E-31	PREDICTED: similar to GA15161-PA [Tribolium castaneum]
BT_Q_SG_ZJU_Unigene9752	gi|239789811|dbj|BAH71505.1|	4.00E-20	ACYPI008219 [Acyrthosiphon pisum]
BT_Q_SG_ZJU_Unigene9753	gi|221124412|ref|XP_002163993.1|	2.00E-06	PREDICTED: hypothetical protein [Hydra magnipapillata] >gi|260220938|emb|CBA29007.1| Ribosome-recycling factor [Curvibacter putative symbiont of Hydra magnipapillata]
BT_Q_SG_ZJU_Unigene9758	gi|47777314|ref|NP_001001403.1|	2.00E-19	probable cation-transporting ATPase 13A1 [Danio rerio] >gi|33311805|gb|AAH55391.1| ATPase type 13A [Danio rerio]
BT_Q_SG_ZJU_Unigene9760	gi|301631291|ref|XP_002944733.1|	2.00E-06	PREDICTED: uncharacterized zinc protease y4wA-like [Xenopus (Silurana) tropicalis]
BT_Q_SG_ZJU_Unigene9762	gi|291226617|ref|XP_002733289.1|	3.00E-14	PREDICTED: baculoviral IAP repeat-containing 5-like [Saccoglossus kowalevskii]
BT_Q_SG_ZJU_Unigene9767	gi|239789824|dbj|BAH71511.1|	8.00E-27	ACYPI003467 [Acyrthosiphon pisum]
BT_Q_SG_ZJU_Unigene9768	gi|156545156|ref|XP_001602949.1|	1.00E-08	PREDICTED: hypothetical protein [Nasonia vitripennis]
BT_Q_SG_ZJU_Unigene9769	gi|66505576|ref|XP_393347.2|	3.00E-36	PREDICTED: similar to CG3527-PA [Apis mellifera]
BT_Q_SG_ZJU_Unigene9770	gi|239792362|dbj|BAH72533.1|	1.00E-39	ACYPI002988 [Acyrthosiphon pisum]
BT_Q_SG_ZJU_Unigene9772	gi|153791737|ref|NP_001093289.1|	7.00E-15	dynein molecular motor protein light chain 1 [Bombyx mori] >gi|117606766|gb|ABK42003.1| dynein molecular motor protein light chain 1 [Bombyx mori] >gi|117606768|gb|ABK42004.1| dynein molecular motor protein light chain 2 [Bombyx mori]
BT_Q_SG_ZJU_Unigene9773	gi|48095871|ref|XP_394536.1|	9.00E-44	PREDICTED: similar to Cyclin K CG15218-PA, isoform A [Apis mellifera]
BT_Q_SG_ZJU_Unigene9774	gi|301628995|ref|XP_002943632.1|	2.00E-08	PREDICTED: putative inner membrane metabolite transport protein ydfJ-like [Xenopus (Silurana) tropicalis]
BT_Q_SG_ZJU_Unigene9782	gi|301791680|ref|XP_002930807.1|	2.00E-06	PREDICTED: UPF0547 protein C16orf87-like isoform 1 [Ailuropoda melanoleuca] >gi|301791682|ref|XP_002930808.1| PREDICTED: UPF0547 protein C16orf87-like isoform 2 [Ailuropoda melanoleuca]
BT_Q_SG_ZJU_Unigene9791	gi|11995033|dbj|BAB20042.1|	1.00E-31	SPARC [Artemia franciscana]
BT_Q_SG_ZJU_Unigene9793	gi|110766623|ref|XP_393119.3|	4.00E-23	PREDICTED: similar to CG6838-PA, isoform A [Apis mellifera]
BT_Q_SG_ZJU_Unigene9799	gi|194766229|ref|XP_001965227.1|	5.00E-44	GF21222 [Drosophila ananassae] >gi|190617837|gb|EDV33361.1| GF21222 [Drosophila ananassae]
BT_Q_SG_ZJU_Unigene9802	gi|156550807|ref|XP_001600649.1|	2.00E-10	PREDICTED: similar to eukaryotic translation initiation factor 4 gamma, 2 [Nasonia vitripennis]
BT_Q_SG_ZJU_Unigene9810	gi|239788936|dbj|BAH71120.1|	6.00E-06	hypothetical protein [Acyrthosiphon pisum]
BT_Q_SG_ZJU_Unigene9812	gi|301629365|ref|XP_002943813.1|	2.00E-30	PREDICTED: sulfate transport system permease protein cysW-like [Xenopus (Silurana) tropicalis]
BT_Q_SG_ZJU_Unigene9822	gi|297697200|ref|XP_002825755.1|	6.00E-13	PREDICTED: high mobility group protein 20A-like [Pongo abelii]
BT_Q_SG_ZJU_Unigene9832	gi|72160374|ref|XP_780046.1|	1.00E-14	PREDICTED: similar to tumor suppressing STF cDNA 1 isoform 1 [Strongylocentrotus purpuratus] >gi|115924310|ref|XP_001192638.1| PREDICTED: similar to tumor suppressing STF cDNA 1 [Strongylocentrotus purpuratus]
BT_Q_SG_ZJU_Unigene9837	gi|195135298|ref|XP_002012071.1|	2.00E-32	GI16768 [Drosophila mojavensis] >gi|193918335|gb|EDW17202.1| GI16768 [Drosophila mojavensis]
BT_Q_SG_ZJU_Unigene9843	gi|301629967|ref|XP_002944103.1|	7.00E-18	PREDICTED: DNA-binding protein HU-beta-like [Xenopus (Silurana) tropicalis]
BT_Q_SG_ZJU_Unigene9844	gi|239799383|dbj|BAH70615.1|	8.00E-29	ACYPI009272 [Acyrthosiphon pisum]
BT_Q_SG_ZJU_Unigene9858	gi|289739951|gb|ADD18723.1|	6.00E-35	gamma-aminobutyric acid receptor associated protein [Glossina morsitans morsitans]
BT_Q_SG_ZJU_Unigene9861	gi|110762844|ref|XP_001121656.1|	7.00E-10	PREDICTED: similar to CG6472-PA [Apis mellifera]
BT_Q_SG_ZJU_Unigene9865	gi|66523933|ref|XP_625154.1|	4.00E-32	PREDICTED: similar to Probable signal recognition particle 68 kDa protein (SRP68) [Apis mellifera]
BT_Q_SG_ZJU_Unigene9867	gi|110750054|ref|XP_396822.3|	2.00E-15	PREDICTED: similar to rhinoceros CG7036-PB, isoform B [Apis mellifera]
BT_Q_SG_ZJU_Unigene9870	gi|288856295|ref|NP_001165801.1|	1.00E-42	succinate dehydrogenase complex, subunit A, flavoprotein (Fp) [Nasonia vitripennis]
BT_Q_SG_ZJU_Unigene9871	gi|110758704|ref|XP_001122395.1|	6.00E-17	PREDICTED: similar to K11B4.1 [Apis mellifera]
BT_Q_SG_ZJU_Unigene9872	gi|195432070|ref|XP_002064049.1|	1.00E-38	GK19958 [Drosophila willistoni] >gi|194160134|gb|EDW75035.1| GK19958 [Drosophila willistoni]
BT_Q_SG_ZJU_Unigene9879	gi|170035707|ref|XP_001845709.1|	5.00E-35	elongation factor -1 beta,delta [Culex quinquefasciatus] >gi|167878015|gb|EDS41398.1| elongation factor -1 beta,delta [Culex quinquefasciatus]
BT_Q_SG_ZJU_Unigene9882	gi|157366840|gb|ABV45411.1|	4.00E-46	COE2 [Bemisia tabaci]
BT_Q_SG_ZJU_Unigene9884	gi|301632056|ref|XP_002945107.1|	1.00E-08	PREDICTED: uncharacterized protein yfiQ-like [Xenopus (Silurana) tropicalis]
BT_Q_SG_ZJU_Unigene9886	gi|189236779|ref|XP_967166.2|	3.00E-34	PREDICTED: similar to reticulon/nogo [Tribolium castaneum]
BT_Q_SG_ZJU_Unigene9889	gi|110760009|ref|XP_394891.3|	4.00E-32	PREDICTED: similar to CG31548-PA [Apis mellifera]
BT_Q_SG_ZJU_Unigene9890	gi|58385426|ref|XP_313936.2|	2.00E-23	AGAP005061-PB [Anopheles gambiae str. PEST] >gi|55240453|gb|EAA09489.2| AGAP005061-PB [Anopheles gambiae str. PEST]
BT_Q_SG_ZJU_Unigene9901	gi|239791724|dbj|BAH72291.1|	8.00E-30	ACYPI000002 [Acyrthosiphon pisum]
BT_Q_SG_ZJU_Unigene9903	gi|296223978|ref|XP_002757853.1|	2.00E-15	PREDICTED: protein phosphatase 1B [Callithrix jacchus]
BT_Q_SG_ZJU_Unigene9910	gi|158287109|ref|XP_309173.4|	7.00E-34	AGAP000977-PA [Anopheles gambiae str. PEST] >gi|157019750|gb|EAA04971.5| AGAP000977-PA [Anopheles gambiae str. PEST]
BT_Q_SG_ZJU_Unigene9916	gi|1945521|gb|AAC37299.1|	9.00E-36	glycerol-3-phosphate dehydrogenase [Chymomyza procnemis]
BT_Q_SG_ZJU_Unigene9921	gi|194907874|ref|XP_001981647.1|	3.00E-15	GG11496 [Drosophila erecta] >gi|190656285|gb|EDV53517.1| GG11496 [Drosophila erecta]
BT_Q_SG_ZJU_Unigene9928	gi|110768527|ref|XP_001122107.1|	5.00E-08	PREDICTED: similar to Metaxin-2 [Apis mellifera]
BT_Q_SG_ZJU_Unigene9933	gi|189235276|ref|XP_973489.2|	2.00E-23	PREDICTED: similar to mmr1/hsr1 GTP binding protein [Tribolium castaneum]
BT_Q_SG_ZJU_Unigene9940	gi|225718478|gb|ACO15085.1|	2.00E-22	DnaJ homolog subfamily C member 7 [Caligus clemensi]
BT_Q_SG_ZJU_Unigene9955	gi|169248235|gb|ACA51847.1|	2.00E-46	cytochrome P450 CYP6-like protein 2 [Bemisia tabaci]
BT_Q_SG_ZJU_Unigene9960	gi|156537480|ref|XP_001607235.1|	3.00E-28	PREDICTED: similar to queuine tRNA-ribosyltransferase [Nasonia vitripennis]
BT_Q_SG_ZJU_Unigene9963	gi|195388324|ref|XP_002052830.1|	2.00E-23	GJ17775 [Drosophila virilis] >gi|194149287|gb|EDW64985.1| GJ17775 [Drosophila virilis]
BT_Q_SG_ZJU_Unigene9966	gi|193587120|ref|XP_001952175.1|	4.00E-17	PREDICTED: similar to AGAP005615-PA [Acyrthosiphon pisum]
BT_Q_SG_ZJU_Unigene9970	gi|239755286|ref|XP_001732883.2|	2.00E-07	PREDICTED: similar to hCG1742442 [Homo sapiens]
BT_Q_SG_ZJU_Unigene9971	gi|82913572|ref|XP_728697.1|	1.00E-12	hypothetical protein [Plasmodium yoelii yoelii str. 17XNL] >gi|23485180|gb|EAA20262.1| unknown-related [Plasmodium yoelii yoelii]
BT_Q_SG_ZJU_Unigene9974	gi|274318359|ref|NP_001162054.1|	1.00E-23	cyclin dependent kinase 8 [Bombyx mori] >gi|254839145|gb|ACT83403.1| cyclin dependent kinase 8 [Bombyx mori]
BT_Q_SG_ZJU_Unigene9979	gi|193632011|ref|XP_001947632.1|	7.00E-44	PREDICTED: similar to NADH-ubiquinone oxidoreductase fe-s protein 2 (ndufs2) [Acyrthosiphon pisum]
BT_Q_SG_ZJU_Unigene9986	gi|239788256|dbj|BAH70816.1|	3.00E-07	ACYPI006186 [Acyrthosiphon pisum]
BT_Q_SG_ZJU_Unigene9989	gi|297684347|ref|XP_002819807.1|	2.00E-07	PREDICTED: LOW QUALITY PROTEIN: protein AF-9-like [Pongo abelii]
BT_Q_SG_ZJU_Unigene9991	gi|156539571|ref|XP_001601646.1|	1.00E-32	PREDICTED: similar to f14p3.9 protein (auxin transport protein) [Nasonia vitripennis]
BT_Q_SG_ZJU_Unigene9992	gi|156542821|ref|XP_001607996.1|	3.00E-38	PREDICTED: similar to developmentally regulated GTP-binding protein 1 (drg 1) [Nasonia vitripennis]
BT_Q_SG_ZJU_Unigene9995	gi|148235251|ref|NP_001085794.1|	4.00E-16	protein kinase C, eta [Xenopus laevis] >gi|49119294|gb|AAH73353.1| MGC80770 protein [Xenopus laevis]
BT_Q_SG_ZJU_Unigene10000	gi|48097372|ref|XP_393764.1|	9.00E-31	PREDICTED: similar to CG8372-PA, isoform A isoform 1 [Apis mellifera]
BT_Q_SG_ZJU_Unigene10019	gi|242017283|ref|XP_002429121.1|	1.00E-48	tubulin alpha-1 chain [Pediculus humanus corporis] >gi|212513985|gb|EEB16383.1| tubulin alpha-1 chain [Pediculus humanus corporis]
BT_Q_SG_ZJU_Unigene10020	gi|189187985|gb|ACD84797.1|	2.00E-40	cytochrome P450 CYP6CM1vB [Bemisia tabaci]
BT_Q_SG_ZJU_Unigene10023	gi|114051287|ref|NP_001040381.1|	3.00E-31	fructose-1,6-bisphosphatase [Bombyx mori] >gi|95102692|gb|ABF51284.1| fructose-1,6-bisphosphatase [Bombyx mori]
BT_Q_SG_ZJU_Unigene10041	gi|91083101|ref|XP_969476.1|	7.00E-10	PREDICTED: similar to MGC88883 protein [Tribolium castaneum]
BT_Q_SG_ZJU_Unigene10045	gi|21068659|emb|CAD21558.1|	2.00E-44	HEL protein [Chironomus tentans]
BT_Q_SG_ZJU_Unigene10049	gi|58387816|ref|XP_315834.2|	1.00E-27	AGAP005813-PA [Anopheles gambiae str. PEST] >gi|55238630|gb|EAA10764.2| AGAP005813-PA [Anopheles gambiae str. PEST]
BT_Q_SG_ZJU_Unigene10051	gi|193605872|ref|XP_001949134.1|	1.00E-27	PREDICTED: similar to CG11190 CG11190-PA [Acyrthosiphon pisum]
BT_Q_SG_ZJU_Unigene10052	gi|296201622|ref|XP_002748120.1|	4.00E-12	PREDICTED: aldehyde dehydrogenase, dimeric NADP-preferring [Callithrix jacchus]
BT_Q_SG_ZJU_Unigene10055	gi|125983258|ref|XP_001355394.1|	1.00E-42	GA17569 [Drosophila pseudoobscura pseudoobscura] >gi|54643709|gb|EAL32452.1| GA17569 [Drosophila pseudoobscura pseudoobscura]
BT_Q_SG_ZJU_Unigene10060	gi|74267852|gb|AAI03056.1|	9.00E-13	Hypothetical protein LOC617088 [Bos taurus]
BT_Q_SG_ZJU_Unigene10064	gi|239791204|dbj|BAH72101.1|	2.00E-23	ACYPI009997 [Acyrthosiphon pisum]
BT_Q_SG_ZJU_Unigene10067	gi|239791057|dbj|BAH72044.1|	3.00E-21	ACYPI001497 [Acyrthosiphon pisum]
BT_Q_SG_ZJU_Unigene10072	gi|58585224|ref|NP_001011641.1|	1.00E-15	heme oxygenase [Apis mellifera] >gi|55700047|dbj|BAD69622.1| heme oxygenase [Apis mellifera]
BT_Q_SG_ZJU_Unigene10075	gi|114051213|ref|NP_001040385.1|	8.00E-35	pelota-like protein [Bombyx mori] >gi|95102708|gb|ABF51295.1| pelota-like protein [Bombyx mori]
BT_Q_SG_ZJU_Unigene10078	gi|183979272|dbj|BAG30797.1|	4.00E-40	similar to CG1519-PA [Papilio xuthus]
BT_Q_SG_ZJU_Unigene10082	gi|91089287|ref|XP_971047.1|	8.00E-38	PREDICTED: similar to Der1-like domain family, member 2 [Tribolium castaneum]
BT_Q_SG_ZJU_Unigene10085	gi|291226621|ref|XP_002733254.1|	9.00E-21	PREDICTED: thymidine kinase-like [Saccoglossus kowalevskii]
BT_Q_SG_ZJU_Unigene10087	gi|296278819|gb|ADH04350.1|	6.00E-30	arginine kinase [Diaphorina citri]
BT_Q_SG_ZJU_Unigene10089	gi|301631338|ref|XP_002944755.1|	8.00E-35	PREDICTED: glycyl-tRNA synthetase alpha subunit-like [Xenopus (Silurana) tropicalis]
BT_Q_SG_ZJU_Unigene10092	gi|263173415|gb|ACY69936.1|	2.00E-32	60S ribosomal protein L10A [Cimex lectularius]
BT_Q_SG_ZJU_Unigene10098	gi|57905120|ref|XP_550819.1|	3.00E-39	AGAP001995-PA [Anopheles gambiae str. PEST] >gi|19168518|emb|CAC94781.1| PROSAg25 protein [Anopheles gambiae] >gi|55233382|gb|EAA01264.2| AGAP001995-PA [Anopheles gambiae str. PEST]
BT_Q_SG_ZJU_Unigene10099	gi|301130069|gb|ADK61887.1|	2.00E-45	cytochrome c oxidase subunit I [Homo sapiens] >gi|301130167|gb|ADK61978.1| cytochrome c oxidase subunit I [Homo sapiens]
BT_Q_SG_ZJU_Unigene10105	gi|148672559|gb|EDL04506.1|	2.00E-08	NADH dehydrogenase (ubiquinone) 1 alpha subcomplex, 6 (B14), isoform CRA_a [Mus musculus]
BT_Q_SG_ZJU_Unigene10106	gi|193690474|ref|XP_001952810.1|	3.00E-09	PREDICTED: similar to RE14563p [Acyrthosiphon pisum]
BT_Q_SG_ZJU_Unigene10110	gi|189237962|ref|XP_001811853.1|	6.00E-12	PREDICTED: similar to CG5830 CG5830-PA [Tribolium castaneum]
BT_Q_SG_ZJU_Unigene10112	gi|156541566|ref|XP_001600489.1|	4.00E-24	PREDICTED: similar to Rab GTPase-interacting factor golgi membrane protein [Nasonia vitripennis]
BT_Q_SG_ZJU_Unigene10114	gi|118780598|ref|XP_310260.5|	6.00E-06	AGAP003729-PA [Anopheles gambiae str. PEST] >gi|116130925|gb|EAA05983.3| AGAP003729-PA [Anopheles gambiae str. PEST]
BT_Q_SG_ZJU_Unigene10117	gi|91086455|ref|XP_969418.1|	5.00E-11	PREDICTED: similar to CG18041 CG18041-PA [Tribolium castaneum]
BT_Q_SG_ZJU_Unigene10119	gi|3876150|emb|CAB02086.1|	1.00E-08	C. elegans protein F20G2.1, partially confirmed by transcript evidence [Caenorhabditis elegans]
BT_Q_SG_ZJU_Unigene10128	gi|291238783|ref|XP_002739301.1|	1.00E-37	PREDICTED: RAN binding protein 9-like isoform 2 [Saccoglossus kowalevskii]
BT_Q_SG_ZJU_Unigene10131	gi|66558033|ref|XP_395566.2|	9.00E-26	PREDICTED: similar to Ribonuclease H1 (RNase H1) (Ribonuclease H type II) [Apis mellifera]
BT_Q_SG_ZJU_Unigene10137	gi|31208009|ref|XP_312971.1|	1.00E-44	AGAP004098-PA [Anopheles gambiae str. PEST] >gi|30177041|gb|EAA08621.2| AGAP004098-PA [Anopheles gambiae str. PEST]
BT_Q_SG_ZJU_Unigene10138	gi|281211246|gb|EFA85412.1|	3.00E-11	UCP029143 family protein [Polysphondylium pallidum PN500]
BT_Q_SG_ZJU_Unigene10139	gi|195145030|ref|XP_002013499.1|	4.00E-08	GL24171 [Drosophila persimilis] >gi|194102442|gb|EDW24485.1| GL24171 [Drosophila persimilis]
BT_Q_SG_ZJU_Unigene10145	gi|195336960|ref|XP_002035101.1|	2.00E-13	GM14514 [Drosophila sechellia] >gi|194128194|gb|EDW50237.1| GM14514 [Drosophila sechellia]
BT_Q_SG_ZJU_Unigene10146	gi|195436746|ref|XP_002066316.1|	2.00E-30	GK18160 [Drosophila willistoni] >gi|194162401|gb|EDW77302.1| GK18160 [Drosophila willistoni]
BT_Q_SG_ZJU_Unigene10158	gi|193587311|ref|XP_001950442.1|	4.00E-35	PREDICTED: similar to AGAP002350-PC [Acyrthosiphon pisum]
BT_Q_SG_ZJU_Unigene10159	gi|110759486|ref|XP_624668.2|	9.00E-42	PREDICTED: similar to CG11266-PB, isoform B [Apis mellifera]
BT_Q_SG_ZJU_Unigene10160	gi|110759899|ref|XP_001119876.1|	5.00E-24	PREDICTED: similar to CG18591-PA [Apis mellifera]
BT_Q_SG_ZJU_Unigene10163	gi|193681205|ref|XP_001949567.1|	5.00E-14	PREDICTED: similar to MICAL-like CG11259-PA, partial [Acyrthosiphon pisum]
BT_Q_SG_ZJU_Unigene10165	gi|156547964|ref|XP_001605038.1|	5.00E-16	PREDICTED: similar to tetraspanin D107 [Nasonia vitripennis]
BT_Q_SG_ZJU_Unigene10174	gi|157822803|ref|NP_001101620.1|	7.00E-10	high mobility group protein 20A [Rattus norvegicus]
BT_Q_SG_ZJU_Unigene10177	gi|149689082|gb|ABR27872.1|	6.00E-24	eukaryotic translation initiation factor 3 subunit 12-like protein [Triatoma infestans]
BT_Q_SG_ZJU_Unigene10180	gi|229576877|ref|NP_001153396.1|	1.00E-18	signal peptidase 18 kDa subunit [Nasonia vitripennis]
BT_Q_SG_ZJU_Unigene10181	gi|91090980|ref|XP_974800.1|	1.00E-21	PREDICTED: similar to AGAP002364-PA [Tribolium castaneum]
BT_Q_SG_ZJU_Unigene10185	gi|30794436|ref|NP_081112.1|	4.00E-07	transcription initiation factor TFIID subunit 11 [Mus musculus] >gi|62511223|sp|Q99JX1.1|TAF11_MOUSE RecName: Full=Transcription initiation factor TFIID subunit 11; AltName: Full=Transcription initiation factor TFIID 28 kDa subunit; Short=TAF(II)28; Short=TAFII-28; Short=TAFII28; AltName: Full=TFIID subunit p30-beta >gi|13542802|gb|AAH05603.1| TAF11 RNA polymerase II, TATA box binding protein (TB…
BT_Q_SG_ZJU_Unigene10192	gi|239787974|dbj|BAH70685.1|	6.00E-28	ACYPI002634 [Acyrthosiphon pisum]
BT_Q_SG_ZJU_Unigene10195	gi|195132841|ref|XP_002010848.1|	2.00E-22	GI21480 [Drosophila mojavensis] >gi|193907636|gb|EDW06503.1| GI21480 [Drosophila mojavensis]
BT_Q_SG_ZJU_Unigene10202	gi|239792184|dbj|BAH72462.1|	4.00E-29	ACYPI007814 [Acyrthosiphon pisum]
BT_Q_SG_ZJU_Unigene10208	gi|13096215|pdb|1E3J|A	2.00E-38	Chain A, Ketose Reductase (Sorbitol Dehydrogenase) From Silverleaf Whitefly >gi|4106364|gb|AAD02817.1| NADP(H)-dependent ketose reductase [Bemisia argentifolii]
BT_Q_SG_ZJU_Unigene10217	gi|115313004|gb|AAI24075.1|	1.00E-08	Zgc:152670 [Danio rerio]
BT_Q_SG_ZJU_Unigene10219	gi|156543654|ref|XP_001607442.1|	5.00E-06	PREDICTED: similar to proteasome subunit beta 7 [Nasonia vitripennis]
BT_Q_SG_ZJU_Unigene10228	gi|193713795|ref|XP_001951388.1|	8.00E-27	PREDICTED: similar to glutaredoxin 3 [Acyrthosiphon pisum]
BT_Q_SG_ZJU_Unigene10229	gi|156553657|ref|XP_001600604.1|	3.00E-46	PREDICTED: similar to ENSANGP00000012072 [Nasonia vitripennis]
BT_Q_SG_ZJU_Unigene10231	gi|193657514|ref|XP_001951604.1|	7.00E-07	PREDICTED: similar to delta-adaptin [Acyrthosiphon pisum]
BT_Q_SG_ZJU_Unigene10233	gi|158299850|ref|XP_319870.3|	3.00E-44	AGAP009117-PA [Anopheles gambiae str. PEST] >gi|157013716|gb|EAA43380.3| AGAP009117-PA [Anopheles gambiae str. PEST]
BT_Q_SG_ZJU_Unigene10238	gi|193582331|ref|XP_001946984.1|	4.00E-36	PREDICTED: similar to DEAD box polypeptide 5 [Acyrthosiphon pisum]
BT_Q_SG_ZJU_Unigene10239	gi|193643525|ref|XP_001945885.1|	3.00E-42	PREDICTED: similar to methionine aminopeptidase 2 [Acyrthosiphon pisum]
[truncated: 1,160 more rows]
