# Supplementary material for: Transcriptomic Analysis of the Salivary Glands of an Invasive Whitefly
Source: PLoS One. 2012 Jun 20;7(6):e39303. doi: 10.1371/journal.pone.0039303 (PMC3379992; doi:10.1371/journal.pone.0039303)
Supplement: Table S4 — Genes with a putative signal peptide. Based on the coding sequence of translated unigenes, the presence of a signal peptide was predicted using SignalP. v. 3.0 in addition to the calculation of cleavage position, resulting in 356 proteins with putative secretion signals. These protein sequences were assigned to transmembrane domain (TMH) prediction with the TMHMM Server v. 2.0. The annotations were acquired through searching unigenes against nr, Swissprot and COG database. (XLS) [file pone.0039303.s005.xls]

geneID	cleavage_site	Signal_peptide_probability	Number of predicted TMHs	Nr best hit-ID	Nr best hit-Evalue	Nr best hit-annotation	Swissprot best hit-ID	Swissprot best hit-Evalue	Swissprot best hit-annotation	COG best hit-Protein-or-Domain	COG best hit-Evalue	COG best hit-ID	COG best hit-Function-Description
BT_Q_SG_ZJU_Unigene81	33	0.888	1	--	--	--	sp|Q8Z3B4|RHTB_SALTI	8.00E-19	Homoserine/homoserine lactone efflux protein OS=Salmonella typhi GN=rhtB PE=3 SV=1	ECs4754	3.00E-19	COG1280	Putative threonine efflux protein
BT_Q_SG_ZJU_Unigene112	25	0.541	1	--	--	--	sp|P42964|YCSG_BACSU	2.00E-09	Uncharacterized membrane protein ycsG OS=Bacillus subtilis GN=ycsG PE=3 SV=4	AGl1874	1.00E-14	COG1914	Mn2+ and Fe2+ transporters of the NRAMP family
BT_Q_SG_ZJU_Unigene120	28	0.705	1	gi|196018528|ref|XP_002118826.1|	7.00E-09	hypothetical protein TRIADDRAFT_62830 [Trichoplax adhaerens] >gi|190578093|gb|EDV18688.1| hypothetical protein TRIADDRAFT_62830 [Trichoplax adhaerens]	sp|P94364|CYDA_BACSU	1.00E-06	Cytochrome d ubiquinol oxidase subunit 1 OS=Bacillus subtilis GN=cydA PE=3 SV=1	SMc02255	3.00E-26	COG1271	Cytochrome bd-type quinol oxidase, subunit 1
BT_Q_SG_ZJU_Unigene135	39	0.775	2	--	--	--	sp|P15078|CSTA_ECOLI	1.00E-18	Carbon starvation protein A OS=Escherichia coli (strain K12) GN=cstA PE=1 SV=3	RSc0022	2.00E-21	COG1966	Carbon starvation protein, predicted membrane protein
BT_Q_SG_ZJU_Unigene136	25	0.729	1	gi|198461904|ref|XP_001352266.2|	1.00E-25	GA18613 [Drosophila pseudoobscura pseudoobscura] >gi|198142482|gb|EAL29304.2| GA18613 [Drosophila pseudoobscura pseudoobscura]	sp|Q12887|COX10_HUMAN	1.00E-21	Protoheme IX farnesyltransferase, mitochondrial OS=Homo sapiens GN=COX10 PE=1 SV=3	YPL172c	2.00E-12	COG0109	Polyprenyltransferase (cytochrome oxidase assembly factor)
BT_Q_SG_ZJU_Unigene162	28	0.926	0	gi|66506890|ref|XP_395059.2|	4.00E-26	PREDICTED: similar to SMC1 CG6057-PA isoform 1 [Apis mellifera]	sp|Q8NDV3|SMC1B_HUMAN	3.00E-19	Structural maintenance of chromosomes protein 1B OS=Homo sapiens GN=SMC1B PE=1 SV=2	SPBC29A10.04	1.00E-16	COG1196	Chromosome segregation ATPases
BT_Q_SG_ZJU_Unigene175	15	0.601	0	--	--	--	--	--	--	--	--	--	--
BT_Q_SG_ZJU_Unigene183	34	0.756	0	--	--	--	--	--	--	--	--	--	--
BT_Q_SG_ZJU_Unigene228	25	0.609	0	--	--	--	--	--	--	--	--	--	--
BT_Q_SG_ZJU_Unigene231	34	0.582	1	--	--	--	--	--	--	--	--	--	--
BT_Q_SG_ZJU_Unigene236	38	0.749	0	gi|296932843|gb|ADH93567.1|	5.00E-26	interleukin enhancer binding factor 2 [Epinephelus coioides] >gi|296932845|gb|ADH93568.1| interleukin enhancer binding factor 2 [Epinephelus coioides]	sp|Q6NZ06|ILF2_DANRE	3.00E-26	Interleukin enhancer-binding factor 2 homolog OS=Danio rerio GN=ilf2 PE=2 SV=1	--	--	--	--
BT_Q_SG_ZJU_Unigene283	24	0.996	1	gi|66507431|ref|XP_393288.2|	1.00E-21	PREDICTED: similar to ubiquitin-conjugating enzyme E2, J1 [Apis mellifera]	sp|Q9JJZ4|UB2J1_MOUSE	4.00E-17	Ubiquitin-conjugating enzyme E2 J1 OS=Mus musculus GN=Ube2j1 PE=1 SV=2	--	--	--	--
BT_Q_SG_ZJU_Unigene286	35	0.597	2	--	--	--	--	--	--	--	--	--	--
BT_Q_SG_ZJU_Unigene328	41	0.475	0	--	--	--	sp|P0A9F6|GCVA_ECOLI	2.00E-27	Glycine cleavage system transcriptional activator OS=Escherichia coli (strain K12) GN=gcvA PE=1 SV=1	gcvA	5.00E-28	COG0583	Transcriptional regulator
BT_Q_SG_ZJU_Unigene336	19	0.84	0	--	--	--	sp|B0T734|RPIA_CAUSK	6.00E-11	Ribose-5-phosphate isomerase A OS=Caulobacter sp. (strain K31) GN=rpiA PE=3 SV=1	CC2303	2.00E-11	COG0120	Ribose 5-phosphate isomerase
BT_Q_SG_ZJU_Unigene338	22	0.957	0	--	--	--	--	--	--	--	--	--	--
BT_Q_SG_ZJU_Unigene340	24	0.57	1	--	--	--	--	--	--	--	--	--	--
BT_Q_SG_ZJU_Unigene373	22	1	0	--	--	--	sp|P0AE94|CREA_SHIFL	6.00E-22	Protein creA OS=Shigella flexneri GN=creA PE=4 SV=1	STM4587	2.00E-25	COG3045	Uncharacterized protein conserved in bacteria
BT_Q_SG_ZJU_Unigene383	23	0.986	0	--	--	--	sp|Q98E66|Y4386_RHILO	4.00E-21	UPF0187 protein mll4386 OS=Rhizobium loti GN=mll4386 PE=3 SV=1	mll4386	1.00E-21	COG3781	Predicted membrane protein
BT_Q_SG_ZJU_Unigene497	29	0.645	0	--	--	--	--	--	--	--	--	--	--
BT_Q_SG_ZJU_Unigene533	29	0.748	2	--	--	--	--	--	--	--	--	--	--
BT_Q_SG_ZJU_Unigene562	32	0.949	1	--	--	--	sp|P09996|YIDB_ECOLI	5.00E-07	Uncharacterized protein yidB OS=Escherichia coli (strain K12) GN=yidB PE=4 SV=1	yidB	1.00E-07	COG3753	Uncharacterized protein conserved in bacteria
BT_Q_SG_ZJU_Unigene611	27	0.994	2	gi|222052452|dbj|BAH15940.1|	1.00E-65	NADH dehydrogenase subunit 4 [Homo sapiens] >gi|222052578|dbj|BAH16057.1| NADH dehydrogenase subunit 4 [Homo sapiens]	sp|P03905|NU4M_HUMAN	2.00E-66	NADH-ubiquinone oxidoreductase chain 4 OS=Homo sapiens GN=MT-ND4 PE=1 SV=1	RP793	2.00E-07	COG1008	NADH:ubiquinone oxidoreductase subunit 4 (chain M)
BT_Q_SG_ZJU_Unigene632	24	0.958	0	gi|189238660|ref|XP_972432.2|	7.00E-66	PREDICTED: similar to CG10903 CG10903-PA [Tribolium castaneum]	sp|Q9CY21|WBS22_MOUSE	2.00E-54	Uncharacterized methyltransferase WBSCR22 OS=Mus musculus GN=Wbscr22 PE=2 SV=1	SPAC26A3.06	9.00E-36	COG0500	SAM-dependent methyltransferases
BT_Q_SG_ZJU_Unigene682	17	0.656	1	gi|193699891|ref|XP_001951272.1|	9.00E-52	PREDICTED: similar to Mitochondrial phosphate carrier protein CG4994-PA [Acyrthosiphon pisum]	sp|O61703|MPCP_CHOFU	2.00E-50	Phosphate carrier protein, mitochondrial OS=Choristoneura fumiferana PE=2 SV=1	--	--	--	--
BT_Q_SG_ZJU_Unigene706	36	0.471	3	--	--	--	--	--	--	--	--	--	--
BT_Q_SG_ZJU_Unigene738	18	0.771	0	gi|259122227|gb|ACV92248.1|	2.00E-27	cytochrome b [Homo sapiens]	sp|P00156|CYB_HUMAN	6.00E-28	Cytochrome b OS=Homo sapiens GN=MT-CYB PE=1 SV=1	RC0359	1.00E-08	COG1290	Cytochrome b subunit of the bc complex
BT_Q_SG_ZJU_Unigene750	22	0.527	0	--	--	--	--	--	--	--	--	--	--
BT_Q_SG_ZJU_Unigene773	21	0.967	1	gi|301629878|ref|XP_002944059.1|	7.00E-14	PREDICTED: sn-glycerol-3-phosphate transport system permease protein ugpA-like [Xenopus (Silurana) tropicalis]	sp|Q8ZLF2|UGPA_SALTY	1.00E-28	sn-glycerol-3-phosphate transport system permease protein ugpA OS=Salmonella typhimurium GN=ugpA PE=3 SV=1	STM3556	3.00E-29	COG1175	ABC-type sugar transport systems, permease components
BT_Q_SG_ZJU_Unigene861	26	0.566	1	gi|156548104|ref|XP_001606456.1|	6.00E-33	PREDICTED: similar to ENSANGP00000026211 [Nasonia vitripennis]	sp|O97649|UCP3_PIG	5.00E-31	Mitochondrial uncoupling protein 3 OS=Sus scrofa GN=UCP3 PE=2 SV=1	--	--	--	--
BT_Q_SG_ZJU_Unigene893	21	0.974	2	--	--	--	sp|Q45974|FLIQ_CAUCR	1.00E-26	Flagellar biosynthetic protein fliQ OS=Caulobacter crescentus GN=fliQ PE=3 SV=1	CC1075	3.00E-27	COG1987	Flagellar biosynthesis pathway, component FliQ
BT_Q_SG_ZJU_Unigene932	34	0.397	1	--	--	--	--	--	--	--	--	--	--
BT_Q_SG_ZJU_Unigene998	28	0.867	3	gi|193594137|ref|XP_001952759.1|	5.00E-42	PREDICTED: similar to CG12341 CG12341-PA [Acyrthosiphon pisum] >gi|193598835|ref|XP_001951441.1| PREDICTED: similar to CG12341 CG12341-PA [Acyrthosiphon pisum]	sp|Q9D342|T170A_MOUSE	2.00E-26	Transmembrane protein 170A OS=Mus musculus GN=Tmem170a PE=2 SV=1	--	--	--	--
BT_Q_SG_ZJU_Unigene1015	20	0.986	0	gi|29169172|gb|AAO66461.1|	2.00E-06	pG1 protein [Homo sapiens]	--	--	--	--	--	--	--
BT_Q_SG_ZJU_Unigene1034	22	1	2	--	--	--	sp|O30499|PIT_RHIME	7.00E-24	Probable low-affinity inorganic phosphate transporter OS=Rhizobium meliloti GN=pit PE=3 SV=1	AGl500	1.00E-24	COG0306	Phosphate/sulphate permeases
BT_Q_SG_ZJU_Unigene1055	20	0.621	0	--	--	--	--	--	--	--	--	--	--
BT_Q_SG_ZJU_Unigene1071	21	0.993	2	gi|121511952|gb|ABM55427.1|	4.00E-23	conserved secreted salivary protein [Xenopsylla cheopis]	sp|Q9CR64|T167A_MOUSE	3.00E-22	Transmembrane protein 167A OS=Mus musculus GN=Tmem167a PE=2 SV=1	--	--	--	--
BT_Q_SG_ZJU_Unigene1147	19	0.813	0	gi|193704588|ref|XP_001947656.1|	6.00E-45	PREDICTED: similar to zyg-ll homolog B [Acyrthosiphon pisum]	sp|Q5TYQ1|ZYG11_DANRE	4.00E-29	Protein zyg-11 homolog OS=Danio rerio GN=zyg11 PE=2 SV=1	--	--	--	--
BT_Q_SG_ZJU_Unigene1217	21	0.927	0	--	--	--	--	--	--	--	--	--	--
BT_Q_SG_ZJU_Unigene1337	31	0.987	0	--	--	--	--	--	--	--	--	--	--
BT_Q_SG_ZJU_Unigene1379	39	0.654	0	--	--	--	--	--	--	--	--	--	--
BT_Q_SG_ZJU_Unigene1428	20	0.932	0	--	--	--	--	--	--	--	--	--	--
BT_Q_SG_ZJU_Unigene1503	21	0.374	2	--	--	--	--	--	--	--	--	--	--
BT_Q_SG_ZJU_Unigene1509	28	0.822	1	--	--	--	sp|O87576|LNT_SALTY	2.00E-06	Apolipoprotein N-acyltransferase OS=Salmonella typhimurium GN=lnt PE=3 SV=2	lnt	5.00E-07	COG0815	Apolipoprotein N-acyltransferase
BT_Q_SG_ZJU_Unigene1533	27	0.903	1	--	--	--	sp|P58163|NORM_CAUCR	3.00E-06	Probable multidrug resistance protein norM OS=Caulobacter crescentus GN=norM PE=3 SV=1	CC2020	6.00E-07	COG0534	Na+-driven multidrug efflux pump
BT_Q_SG_ZJU_Unigene1534	19	0.894	1	--	--	--	--	--	--	--	--	--	--
BT_Q_SG_ZJU_Unigene1553	34	0.664	1	--	--	--	--	--	--	--	--	--	--
BT_Q_SG_ZJU_Unigene1564	30	0.927	1	gi|82913692|ref|XP_728737.1|	4.00E-07	inorganic phosphate transporter [Plasmodium yoelii yoelii str. 17XNL] >gi|23485238|gb|EAA20302.1| inorganic phosphate transporter [Plasmodium yoelii yoelii]	sp|P0AFJ7|PITA_ECOLI	7.00E-17	Low-affinity inorganic phosphate transporter 1 OS=Escherichia coli (strain K12) GN=pitA PE=1 SV=1	pitA	2.00E-17	COG0306	Phosphate/sulphate permeases
BT_Q_SG_ZJU_Unigene1593	24	0.964	0	gi|225713318|gb|ACO12505.1|	4.00E-13	40S ribosomal protein S27 [Lepeophtheirus salmonis]	sp|P47904|RS27_XENLA	3.00E-13	40S ribosomal protein S27 OS=Xenopus laevis GN=rps27 PE=3 SV=2	SPBC1685.10	2.00E-11	COG2051	Ribosomal protein S27E
BT_Q_SG_ZJU_Unigene1638	31	0.768	1	gi|193603774|ref|XP_001950066.1|	3.00E-06	PREDICTED: similar to 4A11 antigen; sperm tail membrane antigen [Acyrthosiphon pisum]	sp|P08722|PTV3B_ECOLI	7.00E-06	PTS system beta-glucoside-specific EIIBCA component OS=Escherichia coli (strain K12) GN=bglF PE=1 SV=1	bglF_2	2.00E-06	COG1263	Phosphotransferase system IIC components, glucose/maltose/N-acetylglucosamine-specific
BT_Q_SG_ZJU_Unigene1657	32	0.987	1	--	--	--	--	--	--	--	--	--	--
BT_Q_SG_ZJU_Unigene1682	42	0.74	0	--	--	--	--	--	--	--	--	--	--
BT_Q_SG_ZJU_Unigene1704	24	0.689	0	--	--	--	--	--	--	--	--	--	--
BT_Q_SG_ZJU_Unigene1711	21	0.942	1	gi|189239129|ref|XP_971353.2|	2.00E-11	PREDICTED: similar to Transmembrane protein 50B (HCV p7-trans-regulated protein 3) [Tribolium castaneum]	sp|Q9CXL1|TM50A_MOUSE	2.00E-10	Transmembrane protein 50A OS=Mus musculus GN=Tmem50a PE=2 SV=1	--	--	--	--
BT_Q_SG_ZJU_Unigene1742	33	0.572	1	--	--	--	--	--	--	BH0030	2.00E-07	COG1173	ABC-type dipeptide/oligopeptide/nickel transport systems, permease components
BT_Q_SG_ZJU_Unigene1745	23	1	1	gi|53681197|gb|AAU89724.1|	3.00E-19	cytochrome b [Sus scrofa]	sp|Q7IY93|CYB_MUSPO	9.00E-20	Cytochrome b OS=Mus poschiavinus GN=MT-CYB PE=3 SV=1	RP271	1.00E-09	COG1290	Cytochrome b subunit of the bc complex
BT_Q_SG_ZJU_Unigene1749	26	0.826	1	--	--	--	--	--	--	--	--	--	--
BT_Q_SG_ZJU_Unigene1780	26	0.579	0	--	--	--	--	--	--	--	--	--	--
BT_Q_SG_ZJU_Unigene1787	23	0.993	0	gi|297467809|ref|XP_002705336.1|	2.00E-11	PREDICTED: ferrous iron transport protein B-like, partial [Bos taurus]	sp|Q7MV19|FEOB1_PORGI	2.00E-10	Ferrous iron transport protein B OS=Porphyromonas gingivalis GN=feoB1 PE=3 SV=1	CC0712	7.00E-18	COG0370	Fe2+ transport system protein B
BT_Q_SG_ZJU_Unigene1808	20	0.709	1	--	--	--	sp|P0AAR7|YBAN_SHIFL	1.00E-06	Inner membrane protein ybaN OS=Shigella flexneri GN=ybaN PE=3 SV=1	AGc4462	2.00E-11	COG2832	Uncharacterized protein conserved in bacteria
BT_Q_SG_ZJU_Unigene1822	22	0.94	1	--	--	--	--	--	--	--	--	--	--
BT_Q_SG_ZJU_Unigene1834	33	0.792	1	--	--	--	sp|P11628|NU5M_EMENI	1.00E-14	NADH-ubiquinone oxidoreductase chain 5 OS=Emericella nidulans GN=nd5 PE=3 SV=2	--	--	--	--
BT_Q_SG_ZJU_Unigene1844	24	0.989	1	--	--	--	--	--	--	SMa0525	1.00E-14	COG1178	ABC-type Fe3+ transport system, permease component
BT_Q_SG_ZJU_Unigene1845	19	0.549	0	gi|110749888|ref|XP_394154.3|	4.00E-14	PREDICTED: similar to dystrophin CG31175-PA, isoform A [Apis mellifera]	sp|P46939|UTRO_HUMAN	3.00E-09	Utrophin OS=Homo sapiens GN=UTRN PE=1 SV=2	--	--	--	--
BT_Q_SG_ZJU_Unigene1848	26	0.505	1	--	--	--	--	--	--	BH0250	1.00E-08	COG0559	Branched-chain amino acid ABC-type transport system, permease components
BT_Q_SG_ZJU_Unigene1918	21	0.52	1	gi|193603774|ref|XP_001950066.1|	1.00E-07	PREDICTED: similar to 4A11 antigen; sperm tail membrane antigen [Acyrthosiphon pisum]	sp|P26207|PTV3B_ERWCH	7.00E-09	PTS system beta-glucoside-specific EIIBCA component OS=Erwinia chrysanthemi GN=arbF PE=3 SV=1	bglF_2	3.00E-09	COG1263	Phosphotransferase system IIC components, glucose/maltose/N-acetylglucosamine-specific
BT_Q_SG_ZJU_Unigene1930	29	0.505	1	--	--	--	sp|P45020|CYOB_HAEIN	3.00E-11	Probable cytochrome oxidase subunit 2 OS=Haemophilus influenzae GN=HI_1075 PE=3 SV=1	AGl1527	5.00E-15	COG1294	Cytochrome bd-type quinol oxidase, subunit 2
BT_Q_SG_ZJU_Unigene1976	20	0.703	1	--	--	--	sp|P08550|CVPA_ECOLI	2.00E-20	Colicin V production protein OS=Escherichia coli (strain K12) GN=cvpA PE=1 SV=1	cvpA	6.00E-21	COG1286	Uncharacterized membrane protein, required for colicin V production
BT_Q_SG_ZJU_Unigene1989	22	0.451	1	--	--	--	sp|A6TG51|KUP_KLEP7	2.00E-16	Low affinity potassium transport system protein kup OS=Klebsiella pneumoniae subsp. pneumoniae (strain ATCC 700721 / MGH 78578) GN=kup PE=3 SV=1	STM3880	2.00E-16	COG3158	K+ transporter
BT_Q_SG_ZJU_Unigene2004	37	0.959	1	--	--	--	--	--	--	--	--	--	--
BT_Q_SG_ZJU_Unigene2017	39	0.592	0	--	--	--	--	--	--	--	--	--	--
BT_Q_SG_ZJU_Unigene2019	22	0.812	1	--	--	--	--	--	--	--	--	--	--
BT_Q_SG_ZJU_Unigene2027	43	0.885	1	--	--	--	--	--	--	--	--	--	--
BT_Q_SG_ZJU_Unigene2030	18	0.851	0	--	--	--	sp|P0ADW6|YHCC_ECOLI	2.00E-13	Uncharacterized protein yhcC OS=Escherichia coli (strain K12) GN=yhcC PE=4 SV=1	yhcC	4.00E-14	COG1242	Predicted Fe-S oxidoreductase
BT_Q_SG_ZJU_Unigene2039	16	0.584	0	--	--	--	--	--	--	--	--	--	--
BT_Q_SG_ZJU_Unigene2063	24	0.973	1	--	--	--	--	--	--	SMc02255	2.00E-10	COG1271	Cytochrome bd-type quinol oxidase, subunit 1
BT_Q_SG_ZJU_Unigene2067	25	0.909	1	--	--	--	--	--	--	CC2001	4.00E-11	COG0805	Sec-independent protein secretion pathway component TatC
BT_Q_SG_ZJU_Unigene2102	21	0.983	0	--	--	--	--	--	--	PA2314	5.00E-06	COG2814	Arabinose efflux permease
BT_Q_SG_ZJU_Unigene2103	24	0.937	1	--	--	--	sp|P0AAD5|TYRP_SHIFL	8.00E-18	Tyrosine-specific transport protein OS=Shigella flexneri GN=tyrP PE=2 SV=1	tyrP	2.00E-18	COG0814	Amino acid permeases
BT_Q_SG_ZJU_Unigene2136	17	0.37	1	gi|193603774|ref|XP_001950066.1|	5.00E-15	PREDICTED: similar to 4A11 antigen; sperm tail membrane antigen [Acyrthosiphon pisum]	sp|P26207|PTV3B_ERWCH	2.00E-15	PTS system beta-glucoside-specific EIIBCA component OS=Erwinia chrysanthemi GN=arbF PE=3 SV=1	bglF_2	6.00E-13	COG1263	Phosphotransferase system IIC components, glucose/maltose/N-acetylglucosamine-specific
BT_Q_SG_ZJU_Unigene2143	38	0.611	0	--	--	--	--	--	--	--	--	--	--
BT_Q_SG_ZJU_Unigene2155	23	0.99	0	--	--	--	--	--	--	--	--	--	--
BT_Q_SG_ZJU_Unigene2163	27	0.628	1	--	--	--	--	--	--	STM1741	2.00E-12	COG1226	Kef-type K+ transport systems, predicted NAD-binding component
BT_Q_SG_ZJU_Unigene2176	20	0.964	1	gi|301629778|ref|XP_002944011.1|	9.00E-07	PREDICTED: probable potassium transport system protein kup-like [Xenopus (Silurana) tropicalis]	sp|Q3YVL0|KUP_SHISS	6.00E-21	Low affinity potassium transport system protein kup OS=Shigella sonnei (strain Ss046) GN=kup PE=3 SV=1	kup	1.00E-21	COG3158	K+ transporter
BT_Q_SG_ZJU_Unigene2178	22	0.922	1	gi|301629455|ref|XP_002943855.1|	7.00E-07	PREDICTED: hypothetical protein LOC100488488 [Xenopus (Silurana) tropicalis]	sp|P25737|LYSP_ECOLI	1.00E-14	Lysine-specific permease OS=Escherichia coli (strain K12) GN=lysP PE=1 SV=5	STM2200	4.00E-16	COG0833	Amino acid transporters
BT_Q_SG_ZJU_Unigene2185	23	0.792	1	gi|301631139|ref|XP_002944664.1|	6.00E-13	PREDICTED: acriflavine resistance protein B-like, partial [Xenopus (Silurana) tropicalis]	sp|Q8G2M6|BEPE_BRUSU	5.00E-12	Efflux pump membrane transporter bepE OS=Brucella suis GN=bepE PE=1 SV=1	RSp0312	1.00E-15	COG0841	Cation/multidrug efflux pump
BT_Q_SG_ZJU_Unigene2212	17	0.994	0	--	--	--	--	--	--	--	--	--	--
BT_Q_SG_ZJU_Unigene2216	24	1	1	gi|193641284|ref|XP_001950427.1|	7.00E-09	PREDICTED: similar to 5-nucleotidase precursor, partial [Acyrthosiphon pisum]	sp|Q56878|USHA_YERE8	5.00E-08	Protein ushA OS=Yersinia enterocolitica serotype O:8 / biotype 1B (strain 8081) GN=ushA PE=3 SV=3	STM0494	1.00E-08	COG0737	5'-nucleotidase/2',3'-cyclic phosphodiesterase and related esterases
BT_Q_SG_ZJU_Unigene2228	23	0.97	1	--	--	--	--	--	--	--	--	--	--
BT_Q_SG_ZJU_Unigene2254	17	0.928	1	--	--	--	--	--	--	--	--	--	--
BT_Q_SG_ZJU_Unigene2376	24	0.997	0	--	--	--	--	--	--	--	--	--	--
BT_Q_SG_ZJU_Unigene2424	32	0.987	1	--	--	--	--	--	--	--	--	--	--
BT_Q_SG_ZJU_Unigene2475	23	0.84	0	gi|66516821|ref|XP_396989.2|	3.00E-13	PREDICTED: similar to WD and tetratricopeptide repeats 1 [Apis mellifera]	sp|Q80ZK9|WDTC1_MOUSE	9.00E-12	WD and tetratricopeptide repeats protein 1 OS=Mus musculus GN=Wdtc1 PE=1 SV=1	--	--	--	--
BT_Q_SG_ZJU_Unigene2520	27	0.903	0	--	--	--	--	--	--	--	--	--	--
BT_Q_SG_ZJU_Unigene2555	14	0.673	0	--	--	--	--	--	--	--	--	--	--
BT_Q_SG_ZJU_Unigene2561	18	0.731	2	gi|301298305|gb|ADK66538.1|	4.00E-17	NADH dehydrogenase subunit 4 [Homo sapiens]	sp|P03905|NU4M_HUMAN	8.00E-18	NADH-ubiquinone oxidoreductase chain 4 OS=Homo sapiens GN=MT-ND4 PE=1 SV=1	SMc01926	5.00E-06	COG1008	NADH:ubiquinone oxidoreductase subunit 4 (chain M)
BT_Q_SG_ZJU_Unigene2581	27	0.892	1	--	--	--	--	--	--	--	--	--	--
BT_Q_SG_ZJU_Unigene2604	30	0.874	1	gi|156543314|ref|XP_001604842.1|	1.00E-10	PREDICTED: similar to CG33113-PD, isoform 3 [Nasonia vitripennis]	sp|Q68EW1|RTN3B_XENLA	4.00E-09	Reticulon-3-B OS=Xenopus laevis GN=rtn3-b PE=2 SV=1	--	--	--	--
BT_Q_SG_ZJU_Unigene2623	23	0.93	1	--	--	--	--	--	--	--	--	--	--
BT_Q_SG_ZJU_Unigene2634	21	0.628	0	--	--	--	--	--	--	--	--	--	--
BT_Q_SG_ZJU_Unigene2646	17	0.712	0	--	--	--	--	--	--	--	--	--	--
BT_Q_SG_ZJU_Unigene2821	23	0.835	0	--	--	--	--	--	--	--	--	--	--
BT_Q_SG_ZJU_Unigene2965	28	0.745	1	--	--	--	sp|P31140|GLPF_SHIFL	2.00E-10	Glycerol uptake facilitator protein OS=Shigella flexneri GN=glpF PE=3 SV=2	STM4087	1.00E-11	COG0580	Glycerol uptake facilitator and related permeases (Major Intrinsic Protein Family)
BT_Q_SG_ZJU_Unigene3030	33	0.965	1	--	--	--	--	--	--	--	--	--	--
BT_Q_SG_ZJU_Unigene3039	19	0.979	1	--	--	--	--	--	--	--	--	--	--
BT_Q_SG_ZJU_Unigene3082	21	0.994	0	--	--	--	--	--	--	--	--	--	--
BT_Q_SG_ZJU_Unigene3104	25	0.994	1	gi|15811692|gb|AAL09065.1|AF420308_1	4.00E-07	aquaporin [Pyrocoelia rufa]	--	--	--	--	--	--	--
BT_Q_SG_ZJU_Unigene3106	24	0.976	1	--	--	--	--	--	--	--	--	--	--
BT_Q_SG_ZJU_Unigene3143	20	0.882	1	gi|170037323|ref|XP_001846508.1|	1.00E-20	growth hormone-inducible transmembrane protein [Culex quinquefasciatus] >gi|167880417|gb|EDS43800.1| growth hormone-inducible transmembrane protein [Culex quinquefasciatus]	sp|Q5XIA8|GHITM_RAT	3.00E-19	Growth hormone-inducible transmembrane protein OS=Rattus norvegicus GN=Ghitm PE=2 SV=1	--	--	--	--
BT_Q_SG_ZJU_Unigene3181	30	0.841	1	gi|170038845|ref|XP_001847258.1|	5.00E-08	vacuolar proton ATPase [Culex quinquefasciatus] >gi|167862449|gb|EDS25832.1| vacuolar proton ATPase [Culex quinquefasciatus]	--	--	--	--	--	--	--
BT_Q_SG_ZJU_Unigene3242	21	0.944	1	gi|195473607|ref|XP_002089084.1|	4.00E-13	GE18922 [Drosophila yakuba] >gi|194175185|gb|EDW88796.1| GE18922 [Drosophila yakuba]	sp|Q8CFY5|COX10_MOUSE	1.00E-08	Protoheme IX farnesyltransferase, mitochondrial OS=Mus musculus GN=Cox10 PE=2 SV=1	--	--	--	--
BT_Q_SG_ZJU_Unigene3248	38	0.895	1	--	--	--	--	--	--	CC0717	2.00E-09	COG1814	Uncharacterized membrane protein
BT_Q_SG_ZJU_Unigene3275	27	0.996	2	gi|218526890|gb|ACK86644.1|	5.00E-15	transmembrane 9 superfamily protein member 4 [Lysiosquillina maculata]	sp|Q4KLL4|TM9S4_RAT	2.00E-11	Transmembrane 9 superfamily member 4 OS=Rattus norvegicus GN=Tm9sf4 PE=2 SV=1	--	--	--	--
BT_Q_SG_ZJU_Unigene3443	40	0.523	1	--	--	--	sp|A6TE25|Y3385_KLEP7	2.00E-16	UPF0441 protein KPN78578_33850 OS=Klebsiella pneumoniae subsp. pneumoniae (strain ATCC 700721 / MGH 78578) GN=KPN78578_33850 PE=3 SV=1	STM3187	2.00E-15	COG5463	Predicted integral membrane protein
BT_Q_SG_ZJU_Unigene3484	25	0.731	2	--	--	--	--	--	--	--	--	--	--
BT_Q_SG_ZJU_Unigene3516	34	0.947	1	--	--	--	sp|P0AC23|FOCA_ECOLI	1.00E-23	Probable formate transporter 1 OS=Escherichia coli (strain K12) GN=focA PE=1 SV=1	STM0974	8.00E-25	COG2116	Formate/nitrite family of transporters
BT_Q_SG_ZJU_Unigene3574	19	0.886	0	--	--	--	sp|Q11156|REGX3_MYCTU	1.00E-06	Sensory transduction protein regX3 OS=Mycobacterium tuberculosis GN=regX3 PE=1 SV=1	CC1595	2.00E-12	COG0745	Response regulators consisting of a CheY-like receiver domain and a winged-helix DNA-binding domain
BT_Q_SG_ZJU_Unigene3642	17	0.754	0	--	--	--	--	--	--	--	--	--	--
BT_Q_SG_ZJU_Unigene3736	44	0.999	1	--	--	--	sp|Q47142|HCAT_ECOLI	2.00E-18	Probable 3-phenylpropionic acid transporter OS=Escherichia coli (strain K12) GN=hcaT PE=1 SV=2	VC0302	2.00E-06	COG0477	Permeases of the major facilitator superfamily
BT_Q_SG_ZJU_Unigene3738	26	0.995	2	gi|242003562|ref|XP_002422774.1|	8.00E-08	lysosomal-associated transmembrane protein, putative [Pediculus humanus corporis] >gi|212505632|gb|EEB10036.1| lysosomal-associated transmembrane protein, putative [Pediculus humanus corporis]	--	--	--	--	--	--	--
BT_Q_SG_ZJU_Unigene3751	23	0.54	0	--	--	--	--	--	--	--	--	--	--
BT_Q_SG_ZJU_Unigene3794	20	0.6	0	--	--	--	sp|P42911|PTPD_ECOLI	3.00E-08	N-acetylgalactosamine permease IID component OS=Escherichia coli (strain K12) GN=agaD PE=4 SV=1	Z4487	2.00E-24	COG3716	Phosphotransferase system, mannose/fructose/N-acetylgalactosamine-specific component IID
BT_Q_SG_ZJU_Unigene3823	25	0.645	1	--	--	--	sp|P54700|FLIP_SALTY	5.00E-25	Flagellar biosynthetic protein fliP OS=Salmonella typhimurium GN=fliP PE=1 SV=1	fliP	1.00E-25	COG1338	Flagellar biosynthesis pathway, component FliP
BT_Q_SG_ZJU_Unigene3848	24	0.943	1	--	--	--	--	--	--	--	--	--	--
BT_Q_SG_ZJU_Unigene3859	40	0.952	0	--	--	--	--	--	--	--	--	--	--
BT_Q_SG_ZJU_Unigene3915	33	0.809	1	--	--	--	sp|P0A926|PGPB_SHIFL	2.00E-16	Phosphatidylglycerophosphatase B OS=Shigella flexneri GN=pgpB PE=3 SV=1	pgpB	4.00E-17	COG0671	Membrane-associated phospholipid phosphatase
BT_Q_SG_ZJU_Unigene3939	19	0.683	0	--	--	--	--	--	--	--	--	--	--
BT_Q_SG_ZJU_Unigene3943	38	0.583	1	gi|134303247|gb|ABO70952.1|	4.00E-23	NADH dehydrogenase subunit 3 [Homo sapiens]	sp|Q9T9Y5|NU3M_GORGO	1.00E-23	NADH-ubiquinone oxidoreductase chain 3 OS=Gorilla gorilla gorilla GN=MT-ND3 PE=3 SV=1	RP357	3.00E-10	COG0838	NADH:ubiquinone oxidoreductase subunit 3 (chain A)
BT_Q_SG_ZJU_Unigene3944	33	0.747	0	--	--	--	--	--	--	--	--	--	--
BT_Q_SG_ZJU_Unigene3961	18	0.693	0	--	--	--	sp|O32291|YXNA_BACSU	3.00E-08	Uncharacterized oxidoreductase yxnA OS=Bacillus subtilis GN=yxnA PE=3 SV=2	DR1620	4.00E-06	COG1028	Dehydrogenases with different specificities (related to short-chain alcohol dehydrogenases)
BT_Q_SG_ZJU_Unigene3985	24	0.985	2	gi|110755373|ref|XP_396540.3|	9.00E-18	PREDICTED: similar to spinster CG8428-PD, isoform D isoform 1 [Apis mellifera]	sp|Q8R0G7|SPNS1_MOUSE	4.00E-14	Protein spinster homolog 1 OS=Mus musculus GN=Spns1 PE=2 SV=1	--	--	--	--
BT_Q_SG_ZJU_Unigene4012	23	0.771	1	--	--	--	--	--	--	--	--	--	--
BT_Q_SG_ZJU_Unigene4033	26	0.653	0	gi|72009127|ref|XP_784614.1|	2.00E-16	PREDICTED: similar to Vac14 homolog (S. cerevisiae) [Strongylocentrotus purpuratus] >gi|115946315|ref|XP_001181269.1| PREDICTED: similar to Vac14 homolog (S. cerevisiae) [Strongylocentrotus purpuratus]	sp|Q66L58|VAC14_DANRE	6.00E-16	Protein VAC14 homolog OS=Danio rerio GN=vac14 PE=2 SV=1	--	--	--	--
BT_Q_SG_ZJU_Unigene4082	26	0.99	2	gi|91083817|ref|XP_973463.1|	2.00E-11	PREDICTED: similar to cationic amino acid transporter [Tribolium castaneum]	sp|Q59I64|YLAT2_DANRE	3.00E-08	Y+L amino acid transporter 2 OS=Danio rerio GN=slc7a6 PE=2 SV=1	--	--	--	--
BT_Q_SG_ZJU_Unigene4163	18	1	0	--	--	--	--	--	--	--	--	--	--
BT_Q_SG_ZJU_Unigene4175	48	0.963	1	--	--	--	sp|P77754|SPY_ECOLI	2.00E-07	Spheroplast protein Y OS=Escherichia coli (strain K12) GN=spy PE=1 SV=1	spy	5.00E-08	COG3678	P pilus assembly/Cpx signaling pathway, periplasmic inhibitor/zinc-resistance associated protein
BT_Q_SG_ZJU_Unigene4177	23	0.951	0	--	--	--	--	--	--	--	--	--	--
BT_Q_SG_ZJU_Unigene4302	28	0.91	0	--	--	--	sp|A8AFL6|RSMF_CITK8	1.00E-19	Ribosomal RNA small subunit methyltransferase F OS=Citrobacter koseri (strain ATCC BAA-895 / CDC 4225-83 / SGSC4696) GN=rsmF PE=3 SV=1	STM1850_1	2.00E-15	COG0144	tRNA and rRNA cytosine-C5-methylases
BT_Q_SG_ZJU_Unigene4306	23	0.661	0	--	--	--	--	--	--	--	--	--	--
BT_Q_SG_ZJU_Unigene4309	19	0.98	2	gi|241725531|ref|XP_002412211.1|	3.00E-11	ammonium transporter, putative [Ixodes scapularis] >gi|215505420|gb|EEC14914.1| ammonium transporter, putative [Ixodes scapularis]	sp|O66515|AMT_AQUAE	5.00E-13	Ammonia channel OS=Aquifex aeolicus GN=amt PE=1 SV=1	mll4246	5.00E-16	COG0004	Ammonia permease
BT_Q_SG_ZJU_Unigene4336	21	0.759	0	--	--	--	sp|P77473|YLAB_ECOLI	7.00E-12	Uncharacterized protein ylaB OS=Escherichia coli (strain K12) GN=ylaB PE=4 SV=2	STM0468	7.00E-13	COG4943	Predicted signal transduction protein containing sensor and EAL domains
BT_Q_SG_ZJU_Unigene4353	16	0.938	1	--	--	--	--	--	--	--	--	--	--
BT_Q_SG_ZJU_Unigene4484	27	0.94	1	--	--	--	--	--	--	--	--	--	--
BT_Q_SG_ZJU_Unigene4537	23	0.547	0	--	--	--	--	--	--	--	--	--	--
BT_Q_SG_ZJU_Unigene4566	44	0.862	0	--	--	--	--	--	--	--	--	--	--
BT_Q_SG_ZJU_Unigene4570	23	0.516	1	--	--	--	--	--	--	--	--	--	--
BT_Q_SG_ZJU_Unigene4604	22	0.812	1	gi|299834811|gb|ADJ56549.1|	3.00E-23	NADH dehydrogenase subunit 2 [Homo sapiens]	sp|P03891|NU2M_HUMAN	6.00E-24	NADH-ubiquinone oxidoreductase chain 2 OS=Homo sapiens GN=MT-ND2 PE=1 SV=2	--	--	--	--
BT_Q_SG_ZJU_Unigene4730	32	0.732	0	--	--	--	--	--	--	--	--	--	--
BT_Q_SG_ZJU_Unigene4732	21	0.553	2	--	--	--	--	--	--	--	--	--	--
BT_Q_SG_ZJU_Unigene4772	22	0.991	0	--	--	--	--	--	--	STM3737	3.00E-07	COG0491	Zn-dependent hydrolases, including glyoxylases
BT_Q_SG_ZJU_Unigene4918	19	0.923	0	--	--	--	--	--	--	--	--	--	--
BT_Q_SG_ZJU_Unigene4948	20	0.596	0	--	--	--	--	--	--	CC0927	7.00E-10	COG0616	Periplasmic serine proteases (ClpP class)
BT_Q_SG_ZJU_Unigene5121	24	0.419	0	gi|194742644|ref|XP_001953811.1|	8.00E-08	GF17952 [Drosophila ananassae] >gi|190626848|gb|EDV42372.1| GF17952 [Drosophila ananassae]	--	--	--	--	--	--	--
BT_Q_SG_ZJU_Unigene5127	21	0.984	1	--	--	--	--	--	--	--	--	--	--
BT_Q_SG_ZJU_Unigene5141	24	0.464	1	gi|156456450|gb|ABU65393.1|	2.00E-27	ATP synthase F0 subunit 8 [Homo sapiens] >gi|223012305|gb|ACM74228.1| ATP synthase F0 subunit 8 [Homo sapiens]	sp|P03928|ATP8_HUMAN	7.00E-28	ATP synthase protein 8 OS=Homo sapiens GN=MT-ATP8 PE=1 SV=1	--	--	--	--
BT_Q_SG_ZJU_Unigene5144	29	0.875	0	--	--	--	--	--	--	--	--	--	--
BT_Q_SG_ZJU_Unigene5218	26	0.933	0	--	--	--	--	--	--	--	--	--	--
BT_Q_SG_ZJU_Unigene5222	20	0.995	1	--	--	--	--	--	--	--	--	--	--
BT_Q_SG_ZJU_Unigene5341	29	0.738	0	--	--	--	--	--	--	--	--	--	--
BT_Q_SG_ZJU_Unigene5436	48	0.852	2	--	--	--	--	--	--	--	--	--	--
BT_Q_SG_ZJU_Unigene5496	19	0.52	0	--	--	--	--	--	--	--	--	--	--
BT_Q_SG_ZJU_Unigene5513	22	0.883	2	gi|66508222|ref|XP_623854.1|	1.00E-12	PREDICTED: similar to CG5484-PC, isoform C [Apis mellifera]	sp|Q5U3G6|YIF1B_DANRE	1.00E-10	Protein YIF1B OS=Danio rerio GN=yif1b PE=2 SV=2	--	--	--	--
BT_Q_SG_ZJU_Unigene5550	36	0.687	1	--	--	--	--	--	--	--	--	--	--
BT_Q_SG_ZJU_Unigene5633	20	0.535	0	--	--	--	--	--	--	--	--	--	--
BT_Q_SG_ZJU_Unigene5640	20	0.807	0	--	--	--	sp|P07094|PHSM_KLEPN	3.00E-21	Maltodextrin phosphorylase (Fragment) OS=Klebsiella pneumoniae GN=malP PE=3 SV=1	STM3514	1.00E-23	COG0058	Glucan phosphorylase
BT_Q_SG_ZJU_Unigene5789	24	0.991	1	gi|158293133|ref|XP_314472.4|	7.00E-23	AGAP010499-PA [Anopheles gambiae str. PEST] >gi|157016812|gb|EAA09898.4| AGAP010499-PA [Anopheles gambiae str. PEST]	sp|P12711|ADHX_RAT	5.00E-23	Alcohol dehydrogenase class-3 OS=Rattus norvegicus GN=Adh5 PE=1 SV=2	YPO1502	2.00E-16	COG1062	Zn-dependent alcohol dehydrogenases, class III
BT_Q_SG_ZJU_Unigene5813	54	0.792	1	--	--	--	sp|P46317|PTJC_BACSU	4.00E-10	Lichenan permease IIC component OS=Bacillus subtilis GN=licC PE=2 SV=1	BS_ywbA	1.00E-11	COG1455	Phosphotransferase system cellobiose-specific component IIC
BT_Q_SG_ZJU_Unigene5852	25	0.855	1	gi|256773186|ref|NP_001157948.1|	6.00E-24	sarco/endoplasmic reticulum calcium ATPase [Bombyx mori] >gi|255661412|gb|ACU25861.1| sarco/endoplasmic reticulum calcium ATPase [Bombyx mori]	sp|Q7PPA5|ATC1_ANOGA	3.00E-22	Calcium-transporting ATPase sarcoplasmic/endoplasmic reticulum type OS=Anopheles gambiae GN=Ca-P60A PE=3 SV=5	--	--	--	--
BT_Q_SG_ZJU_Unigene5924	18	0.919	2	--	--	--	--	--	--	--	--	--	--
BT_Q_SG_ZJU_Unigene5952	42	0.759	1	--	--	--	--	--	--	--	--	--	--
BT_Q_SG_ZJU_Unigene5976	18	0.846	0	--	--	--	--	--	--	--	--	--	--
BT_Q_SG_ZJU_Unigene5984	23	0.558	0	gi|156554116|ref|XP_001602967.1|	2.00E-24	PREDICTED: similar to protein disulfide isomerase [Nasonia vitripennis]	sp|Q11067|PDIA6_CAEEL	2.00E-19	Probable protein disulfide-isomerase A6 OS=Caenorhabditis elegans GN=tag-320 PE=2 SV=1	--	--	--	--
BT_Q_SG_ZJU_Unigene5995	28	0.658	1	--	--	--	--	--	--	--	--	--	--
BT_Q_SG_ZJU_Unigene6089	28	0.719	2	--	--	--	--	--	--	--	--	--	--
BT_Q_SG_ZJU_Unigene6096	30	0.889	0	gi|239788326|dbj|BAH70851.1|	1.00E-12	ACYPI007021 [Acyrthosiphon pisum]	sp|P30049|ATPD_HUMAN	4.00E-06	ATP synthase subunit delta, mitochondrial OS=Homo sapiens GN=ATP5D PE=1 SV=2	--	--	--	--
BT_Q_SG_ZJU_Unigene6142	26	0.978	1	gi|193671564|ref|XP_001950687.1|	7.00E-17	PREDICTED: similar to CG8306 CG8306-PA [Acyrthosiphon pisum]	sp|Q960W6|FACR3_DROME	7.00E-15	Putative fatty acyl-CoA reductase CG8306 OS=Drosophila melanogaster GN=CG8306 PE=2 SV=1	--	--	--	--
BT_Q_SG_ZJU_Unigene6154	19	0.88	0	--	--	--	--	--	--	--	--	--	--
BT_Q_SG_ZJU_Unigene6164	19	0.512	0	--	--	--	--	--	--	--	--	--	--
BT_Q_SG_ZJU_Unigene6180	17	0.982	0	gi|50745282|ref|XP_420055.1|	5.00E-24	PREDICTED: similar to Methylmalonyl Coenzyme A mutase [Gallus gallus]	sp|Q05065|MUTB_STRCM	6.00E-26	Methylmalonyl-CoA mutase large subunit OS=Streptomyces cinnamonensis GN=mutB PE=3 SV=1	ML1799_1	1.00E-26	COG1884	Methylmalonyl-CoA mutase, N-terminal domain/subunit
BT_Q_SG_ZJU_Unigene6200	20	1	0	gi|195394898|ref|XP_002056076.1|	1.00E-05	GJ10741 [Drosophila virilis] >gi|194142785|gb|EDW59188.1| GJ10741 [Drosophila virilis]	--	--	--	--	--	--	--
BT_Q_SG_ZJU_Unigene6322	18	0.41	1	--	--	--	--	--	--	--	--	--	--
BT_Q_SG_ZJU_Unigene6405	16	0.652	0	--	--	--	--	--	--	--	--	--	--
BT_Q_SG_ZJU_Unigene6428	27	0.996	2	gi|91078198|ref|XP_968342.1|	9.00E-18	PREDICTED: similar to aquaporin [Tribolium castaneum]	sp|Q23808|AQP_CICVR	1.00E-17	Aquaporin AQPcic OS=Cicadella viridis GN=AQP PE=1 SV=1	SSO1601	8.00E-09	COG0580	Glycerol uptake facilitator and related permeases (Major Intrinsic Protein Family)
BT_Q_SG_ZJU_Unigene6511	19	0.539	0	gi|170070165|ref|XP_001869487.1|	6.00E-08	dihydropteridine reductase [Culex quinquefasciatus] >gi|167866056|gb|EDS29439.1| dihydropteridine reductase [Culex quinquefasciatus]	--	--	--	--	--	--	--
BT_Q_SG_ZJU_Unigene6536	34	0.933	2	--	--	--	sp|Q8X4V6|YGAY_ECO57	2.00E-24	Uncharacterized transporter ygaY OS=Escherichia coli O157:H7 GN=ygaY PE=3 SV=1	b2681m	4.00E-25	COG0477	Permeases of the major facilitator superfamily
BT_Q_SG_ZJU_Unigene6570	22	0.973	0	--	--	--	sp|P74409|Y260_SYNY3	6.00E-08	UPF0053 protein sll0260 OS=Synechocystis sp. (strain PCC 6803) GN=sll0260 PE=3 SV=1	CC0364	4.00E-16	COG1253	Hemolysins and related proteins containing CBS domains
BT_Q_SG_ZJU_Unigene6579	30	0.653	0	--	--	--	--	--	--	--	--	--	--
BT_Q_SG_ZJU_Unigene6624	15	0.918	0	--	--	--	--	--	--	--	--	--	--
BT_Q_SG_ZJU_Unigene6640	21	0.718	0	--	--	--	--	--	--	--	--	--	--
BT_Q_SG_ZJU_Unigene6675	20	0.675	2	gi|193657413|ref|XP_001951584.1|	1.00E-30	PREDICTED: similar to AGAP000832-PA [Acyrthosiphon pisum]	sp|Q5RC74|DERL2_PONAB	2.00E-28	Derlin-2 OS=Pongo abelii GN=DERL2 PE=2 SV=1	ECU11g1920	1.00E-09	COG5291	Predicted membrane protein
BT_Q_SG_ZJU_Unigene6688	30	0.737	1	gi|170037222|ref|XP_001846458.1|	8.00E-30	chloride channel protein 3 [Culex quinquefasciatus] >gi|167880292|gb|EDS43675.1| chloride channel protein 3 [Culex quinquefasciatus]	sp|P51796|CLCN5_RAT	4.00E-28	H(+)/Cl(-) exchange transporter 5 OS=Rattus norvegicus GN=Clcn5 PE=2 SV=1	SPBC19C7.11_1	4.00E-12	COG0038	Chloride channel protein EriC
BT_Q_SG_ZJU_Unigene6698	23	0.947	0	gi|281202576|gb|EFA76778.1|	4.00E-16	regulator of chromosome condensation domain-containing protein [Polysphondylium pallidum PN500]	sp|P41006|PYRP_BACCL	2.00E-09	Uracil permease OS=Bacillus caldolyticus GN=pyrP PE=3 SV=1	ycdG	3.00E-23	COG2233	Xanthine/uracil permeases
BT_Q_SG_ZJU_Unigene6743	46	0.674	1	--	--	--	--	--	--	--	--	--	--
BT_Q_SG_ZJU_Unigene6776	38	0.88	1	--	--	--	--	--	--	--	--	--	--
BT_Q_SG_ZJU_Unigene6790	21	0.904	0	--	--	--	--	--	--	--	--	--	--
BT_Q_SG_ZJU_Unigene6800	18	0.987	0	--	--	--	sp|Q9A6U9|Y1984_CAUCR	4.00E-14	UPF0169 lipoprotein CC_1984 OS=Caulobacter crescentus GN=CC_1984 PE=3 SV=1	CC1984	1.00E-14	COG4105	DNA uptake lipoprotein
BT_Q_SG_ZJU_Unigene6835	26	0.554	1	--	--	--	--	--	--	--	--	--	--
BT_Q_SG_ZJU_Unigene6960	46	0.585	2	gi|2353183|gb|AAB69390.1|	7.00E-15	CtrA [Dictyostelium discoideum]	sp|O07576|YHDG_BACSU	4.00E-20	Uncharacterized amino acid permease yhdG OS=Bacillus subtilis GN=yhdG PE=2 SV=1	XF2208	2.00E-23	COG0531	Amino acid transporters
BT_Q_SG_ZJU_Unigene6973	18	0.804	2	--	--	--	--	--	--	--	--	--	--
BT_Q_SG_ZJU_Unigene6991	18	0.606	0	gi|91085437|ref|XP_968834.1|	3.00E-09	PREDICTED: similar to early embryogenesis protein zyg-11 like, ZYGote defective : embryonic lethal ZYG-11 (90.8 kD) (zyg-11) [Tribolium castaneum]	sp|Q5TYQ1|ZYG11_DANRE	2.00E-08	Protein zyg-11 homolog OS=Danio rerio GN=zyg11 PE=2 SV=1	--	--	--	--
BT_Q_SG_ZJU_Unigene7084	31	0.56	0	--	--	--	--	--	--	--	--	--	--
BT_Q_SG_ZJU_Unigene7105	38	0.744	1	--	--	--	--	--	--	--	--	--	--
BT_Q_SG_ZJU_Unigene7111	31	0.888	0	--	--	--	--	--	--	--	--	--	--
BT_Q_SG_ZJU_Unigene7273	17	0.903	0	--	--	--	--	--	--	Rv1939	1.00E-14	COG1853	Conserved protein/domain typically associated with flavoprotein oxygenases, DIM6/NTAB family
BT_Q_SG_ZJU_Unigene7330	19	0.515	2	gi|193664424|ref|XP_001950126.1|	2.00E-23	PREDICTED: similar to solute carrier family 35 member B1 [Acyrthosiphon pisum]	sp|Q66HX0|S35B1_DANRE	6.00E-21	Solute carrier family 35 member B1 OS=Danio rerio GN=slc35b1 PE=2 SV=1	YPL244c	4.00E-10	COG0697	Permeases of the drug/metabolite transporter (DMT) superfamily
BT_Q_SG_ZJU_Unigene7334	17	0.947	2	--	--	--	sp|Q7MUS4|Y1411_PORGI	3.00E-08	Uncharacterized transporter PG_1411 OS=Porphyromonas gingivalis GN=PG_1411 PE=3 SV=1	STM3807	1.00E-27	COG2985	Predicted permease
BT_Q_SG_ZJU_Unigene7349	24	0.713	1	--	--	--	--	--	--	--	--	--	--
BT_Q_SG_ZJU_Unigene7350	27	0.661	0	--	--	--	--	--	--	--	--	--	--
BT_Q_SG_ZJU_Unigene7384	18	0.856	0	--	--	--	--	--	--	--	--	--	--
BT_Q_SG_ZJU_Unigene7441	28	0.803	2	gi|156545796|ref|XP_001605798.1|	3.00E-31	PREDICTED: similar to ENSANGP00000012220 [Nasonia vitripennis]	sp|Q16QL3|COQ2_AEDAE	3.00E-30	Para-hydroxybenzoate--polyprenyltransferase, mitochondrial OS=Aedes aegypti GN=coq2 PE=3 SV=1	AGc1159	2.00E-18	COG0382	4-hydroxybenzoate polyprenyltransferase and related prenyltransferases
BT_Q_SG_ZJU_Unigene7460	29	0.617	0	--	--	--	--	--	--	--	--	--	--
BT_Q_SG_ZJU_Unigene7509	20	0.708	0	--	--	--	--	--	--	--	--	--	--
BT_Q_SG_ZJU_Unigene7512	28	0.972	1	gi|110775866|ref|XP_001121855.1|	2.00E-09	PREDICTED: similar to Excitatory amino acid transporter 3 (Sodium-dependent glutamate/aspartate transporter 3) (Excitatory amino-acid carrier 1), partial [Apis mellifera]	sp|P24944|GLTT_BACCA	2.00E-11	Proton/sodium-glutamate symport protein OS=Bacillus caldotenax GN=gltT PE=1 SV=1	CC0263	2.00E-27	COG1301	Na+/H+-dicarboxylate symporters
BT_Q_SG_ZJU_Unigene7514	21	0.718	1	--	--	--	sp|P31474|HSRA_ECOLI	3.00E-14	Probable transport protein hsrA OS=Escherichia coli (strain K12) GN=hsrA PE=1 SV=1	AGc1103	7.00E-16	COG0477	Permeases of the major facilitator superfamily
BT_Q_SG_ZJU_Unigene7532	30	0.854	0	--	--	--	--	--	--	--	--	--	--
BT_Q_SG_ZJU_Unigene7567	36	0.923	0	--	--	--	--	--	--	--	--	--	--
BT_Q_SG_ZJU_Unigene7594	19	0.876	0	--	--	--	--	--	--	--	--	--	--
BT_Q_SG_ZJU_Unigene7603	28	0.959	1	--	--	--	--	--	--	--	--	--	--
BT_Q_SG_ZJU_Unigene7642	28	0.999	0	--	--	--	--	--	--	--	--	--	--
BT_Q_SG_ZJU_Unigene7679	27	0.626	0	--	--	--	--	--	--	--	--	--	--
BT_Q_SG_ZJU_Unigene7689	21	0.926	2	--	--	--	sp|P77389|YDHP_ECOLI	2.00E-16	Inner membrane transport protein ydhP OS=Escherichia coli (strain K12) GN=ydhP PE=1 SV=1	ydhP	4.00E-17	COG2814	Arabinose efflux permease
BT_Q_SG_ZJU_Unigene7704	25	0.994	1	--	--	--	--	--	--	--	--	--	--
BT_Q_SG_ZJU_Unigene7715	19	0.844	0	--	--	--	--	--	--	--	--	--	--
BT_Q_SG_ZJU_Unigene7722	20	0.999	0	gi|170062742|ref|XP_001866801.1|	2.00E-06	probable ER retained protein [Culex quinquefasciatus] >gi|167880566|gb|EDS43949.1| probable ER retained protein [Culex quinquefasciatus]	sp|Q9HCN8|SDF2L_HUMAN	7.00E-06	Stromal cell-derived factor 2-like protein 1 OS=Homo sapiens GN=SDF2L1 PE=1 SV=2	--	--	--	--
BT_Q_SG_ZJU_Unigene7782	22	0.96	2	gi|301629778|ref|XP_002944011.1|	1.00E-17	PREDICTED: probable potassium transport system protein kup-like [Xenopus (Silurana) tropicalis]	sp|A7MMV3|KUP_ENTS8	4.00E-33	Low affinity potassium transport system protein kup OS=Enterobacter sakazakii (strain ATCC BAA-894) GN=kup PE=3 SV=1	kup	6.00E-33	COG3158	K+ transporter
BT_Q_SG_ZJU_Unigene7845	22	0.537	0	gi|195110541|ref|XP_001999838.1|	6.00E-17	GI24746 [Drosophila mojavensis] >gi|193916432|gb|EDW15299.1| GI24746 [Drosophila mojavensis]	sp|Q9WTT6|GUAD_RAT	8.00E-16	Guanine deaminase OS=Rattus norvegicus GN=Gda PE=1 SV=1	CAC0282	3.00E-10	COG0402	Cytosine deaminase and related metal-dependent hydrolases
BT_Q_SG_ZJU_Unigene7868	30	0.501	0	--	--	--	--	--	--	--	--	--	--
BT_Q_SG_ZJU_Unigene7986	23	0.86	0	--	--	--	--	--	--	--	--	--	--
BT_Q_SG_ZJU_Unigene8059	20	0.649	0	gi|156542369|ref|XP_001600536.1|	1.00E-20	PREDICTED: similar to CG2767-PA [Nasonia vitripennis]	sp|Q5U1Y4|AKCL2_RAT	1.00E-13	1,5-anhydro-D-fructose reductase OS=Rattus norvegicus GN=Akr1e2 PE=2 SV=1	CC3428	2.00E-11	COG0656	Aldo/keto reductases, related to diketogulonate reductase
BT_Q_SG_ZJU_Unigene8122	16	0.716	0	--	--	--	--	--	--	--	--	--	--
BT_Q_SG_ZJU_Unigene8123	28	0.781	0	--	--	--	--	--	--	--	--	--	--
BT_Q_SG_ZJU_Unigene8141	16	0.994	0	gi|208657805|gb|ACI30196.1|	1.00E-07	emp24/gp25L/p24 family of membrane trafficking protein [Anopheles darlingi]	sp|Q3T133|TMED9_BOVIN	3.00E-06	Transmembrane emp24 domain-containing protein 9 OS=Bos taurus GN=TMED9 PE=2 SV=1	--	--	--	--
BT_Q_SG_ZJU_Unigene8263	20	0.949	0	--	--	--	--	--	--	--	--	--	--
BT_Q_SG_ZJU_Unigene8335	26	0.677	0	--	--	--	--	--	--	--	--	--	--
BT_Q_SG_ZJU_Unigene8340	19	0.951	1	gi|301630809|ref|XP_002944509.1|	1.00E-25	PREDICTED: acriflavine resistance protein B-like [Xenopus (Silurana) tropicalis]	sp|P52002|MEXB_PSEAE	6.00E-32	Multidrug resistance protein mexB OS=Pseudomonas aeruginosa GN=mexB PE=1 SV=2	CC0807	2.00E-33	COG0841	Cation/multidrug efflux pump
BT_Q_SG_ZJU_Unigene8422	20	0.812	0	--	--	--	sp|P69987|YSCU_YERPS	2.00E-09	Yop proteins translocation protein U OS=Yersinia pseudotuberculosis GN=yscU PE=3 SV=1	PA1690	4.00E-10	COG4792	Type III secretory pathway, component EscU
BT_Q_SG_ZJU_Unigene8434	25	0.996	1	--	--	--	sp|P0AD12|YEEZ_ECOLI	4.00E-23	Protein yeeZ OS=Escherichia coli (strain K12) GN=yeeZ PE=1 SV=1	STM2070	5.00E-24	COG0451	Nucleoside-diphosphate-sugar epimerases
BT_Q_SG_ZJU_Unigene8443	32	0.783	1	--	--	--	--	--	--	--	--	--	--
BT_Q_SG_ZJU_Unigene8449	27	0.851	1	--	--	--	--	--	--	--	--	--	--
BT_Q_SG_ZJU_Unigene8460	22	0.715	0	gi|66522931|ref|XP_623191.1|	4.00E-18	PREDICTED: similar to ergic53 CG6822-PA, isoform A isoform 1 [Apis mellifera]	sp|Q62902|LMAN1_RAT	3.00E-11	Protein ERGIC-53 OS=Rattus norvegicus GN=Lman1 PE=1 SV=1	--	--	--	--
BT_Q_SG_ZJU_Unigene8523	24	0.968	0	gi|94468998|gb|ABF18348.1|	1.00E-34	mitochondrial phosphate carrier protein [Aedes aegypti]	sp|Q5R7W2|MPCP_PONAB	3.00E-30	Phosphate carrier protein, mitochondrial OS=Pongo abelii GN=SLC25A3 PE=2 SV=1	--	--	--	--
BT_Q_SG_ZJU_Unigene8525	20	0.675	0	--	--	--	--	--	--	--	--	--	--
BT_Q_SG_ZJU_Unigene8547	23	0.993	0	--	--	--	--	--	--	--	--	--	--
BT_Q_SG_ZJU_Unigene8648	27	0.671	2	--	--	--	--	--	--	--	--	--	--
BT_Q_SG_ZJU_Unigene8715	22	0.873	1	gi|195376263|ref|XP_002046916.1|	1.00E-32	GJ12226 [Drosophila virilis] >gi|194154074|gb|EDW69258.1| GJ12226 [Drosophila virilis]	sp|Q25479|NKCL_MANSE	2.00E-24	Bumetanide-sensitive sodium-(potassium)-chloride cotransporter OS=Manduca sexta PE=2 SV=1	SPBC18H10.16	2.00E-07	COG0531	Amino acid transporters
BT_Q_SG_ZJU_Unigene8725	24	0.748	0	gi|110751363|ref|XP_623196.2|	2.00E-26	PREDICTED: similar to CG8036-PB, isoform B isoform 1 [Apis mellifera]	sp|Q2NL26|TKTL1_BOVIN	7.00E-25	Transketolase-like protein 1 OS=Bos taurus GN=TKTL1 PE=2 SV=1	all4052	8.00E-15	COG0021	Transketolase
BT_Q_SG_ZJU_Unigene8743	25	0.899	2	--	--	--	--	--	--	--	--	--	--
BT_Q_SG_ZJU_Unigene8757	23	0.784	0	gi|118094545|ref|XP_422430.2|	2.00E-20	PREDICTED: similar to LOC496978 protein [Gallus gallus]	sp|Q5RDK5|DCUP_PONAB	7.00E-19	Uroporphyrinogen decarboxylase OS=Pongo abelii GN=UROD PE=2 SV=1	SPCC4B3.05c	7.00E-14	COG0407	Uroporphyrinogen-III decarboxylase
BT_Q_SG_ZJU_Unigene8784	37	0.854	2	--	--	--	sp|Q52978|PHAAB_RHIME	1.00E-12	Probable K(+)/H(+) antiporter subunit A/B OS=Rhizobium meliloti GN=phaAB PE=3 SV=2	BMEII0770_1	1.00E-13	COG1009	NADH:ubiquinone oxidoreductase subunit 5 (chain L)/Multisubunit Na+/H+ antiporter, MnhA subunit
BT_Q_SG_ZJU_Unigene8790	19	0.652	0	gi|193662232|ref|XP_001948537.1|	1.00E-18	PREDICTED: similar to actin-related protein 2/3 complex subunit 1A [Acyrthosiphon pisum]	sp|Q99PD4|ARC1A_RAT	3.00E-12	Actin-related protein 2/3 complex subunit 1A OS=Rattus norvegicus GN=Arpc1a PE=2 SV=1	YBR234c	5.00E-06	COG2319	FOG: WD40 repeat
BT_Q_SG_ZJU_Unigene8793	16	0.799	2	gi|119570944|gb|EAW50559.1|	3.00E-26	hCG2042723 [Homo sapiens]	sp|P03923|NU6M_HUMAN	1.00E-26	NADH-ubiquinone oxidoreductase chain 6 OS=Homo sapiens GN=MT-ND6 PE=1 SV=2	--	--	--	--
BT_Q_SG_ZJU_Unigene8892	33	0.55	0	--	--	--	--	--	--	--	--	--	--
BT_Q_SG_ZJU_Unigene9023	19	0.866	0	--	--	--	sp|P31033|MTM4_NEIGO	4.00E-08	Modification methylase NgoMIV OS=Neisseria gonorrhoeae GN=ngoMIVM PE=3 SV=1	alr4815	5.00E-08	COG0270	Site-specific DNA methylase
BT_Q_SG_ZJU_Unigene9159	39	0.764	1	gi|114051710|ref|NP_001040326.1|	3.00E-12	mitochondrial prohibitin complex protein 2 [Bombyx mori] >gi|87248567|gb|ABD36336.1| mitochondrial prohibitin complex protein 2 [Bombyx mori]	sp|Q2HJ97|PHB2_BOVIN	2.00E-06	Prohibitin-2 OS=Bos taurus GN=PHB2 PE=2 SV=1	--	--	--	--
BT_Q_SG_ZJU_Unigene9172	40	0.507	2	gi|110757630|ref|XP_394861.3|	1.00E-12	PREDICTED: similar to CG3106-PA [Apis mellifera]	sp|Q09225|NRF6_CAEEL	4.00E-10	Nose resistant to fluoxetine protein 6 OS=Caenorhabditis elegans GN=nrf-6 PE=1 SV=3	--	--	--	--
BT_Q_SG_ZJU_Unigene9232	18	0.652	0	--	--	--	--	--	--	--	--	--	--
BT_Q_SG_ZJU_Unigene9240	18	0.998	0	--	--	--	sp|P37443|YCAI_ECOLI	5.00E-09	Uncharacterized protein ycaI OS=Escherichia coli (strain K12) GN=ycaI PE=4 SV=3	ECs0996_1	3.00E-10	COG0658	Predicted membrane metal-binding protein
BT_Q_SG_ZJU_Unigene9242	33	0.557	1	gi|125743142|gb|ABN54493.1|	7.00E-12	conserved protein [Oncopeltus fasciatus]	sp|Q32L57|TUSC3_BOVIN	9.00E-09	Tumor suppressor candidate 3 OS=Bos taurus GN=TUSC3 PE=2 SV=1	--	--	--	--
BT_Q_SG_ZJU_Unigene9263	15	0.642	0	--	--	--	--	--	--	--	--	--	--
BT_Q_SG_ZJU_Unigene9264	18	0.672	1	--	--	--	--	--	--	--	--	--	--
BT_Q_SG_ZJU_Unigene9285	22	0.866	0	gi|156538144|ref|XP_001608266.1|	2.00E-11	PREDICTED: similar to 16 kDa salivary protein [Nasonia vitripennis]	sp|Q07984|SSRD_RAT	4.00E-09	Translocon-associated protein subunit delta OS=Rattus norvegicus GN=Ssr4 PE=2 SV=1	--	--	--	--
BT_Q_SG_ZJU_Unigene9299	33	0.579	0	--	--	--	--	--	--	--	--	--	--
BT_Q_SG_ZJU_Unigene9422	29	0.822	1	gi|156543772|ref|XP_001606233.1|	1.00E-20	PREDICTED: similar to CG7888-PB [Nasonia vitripennis]	sp|Q4KL91|S36A4_XENLA	6.00E-06	Proton-coupled amino acid transporter 4 OS=Xenopus laevis GN=slc36a4 PE=2 SV=1	--	--	--	--
BT_Q_SG_ZJU_Unigene9474	20	0.522	0	--	--	--	--	--	--	--	--	--	--
BT_Q_SG_ZJU_Unigene9480	29	0.881	1	gi|198420753|ref|XP_002124790.1|	8.00E-06	PREDICTED: similar to transmembrane protein 214 [Ciona intestinalis]	sp|Q6NUQ4|TM214_HUMAN	3.00E-06	Transmembrane protein 214 OS=Homo sapiens GN=TMEM214 PE=1 SV=2	--	--	--	--
BT_Q_SG_ZJU_Unigene9512	15	0.892	0	--	--	--	--	--	--	--	--	--	--
BT_Q_SG_ZJU_Unigene9598	17	0.794	3	gi|121543811|gb|ABM55570.1|	3.00E-23	Bax inhibitor 1-like protein [Maconellicoccus hirsutus]	sp|P55062|BI1_RAT	3.00E-19	Bax inhibitor 1 OS=Rattus norvegicus GN=Tmbim6 PE=2 SV=2	--	--	--	--
BT_Q_SG_ZJU_Unigene9654	18	0.993	0	--	--	--	--	--	--	--	--	--	--
BT_Q_SG_ZJU_Unigene9731	23	0.817	1	gi|193603364|ref|XP_001946084.1|	2.00E-07	PREDICTED: similar to lysosomal-associated transmembrane protein [Acyrthosiphon pisum]	--	--	--	--	--	--	--
BT_Q_SG_ZJU_Unigene9734	17	0.918	0	--	--	--	--	--	--	--	--	--	--
BT_Q_SG_ZJU_Unigene9774	20	0.932	2	gi|301628995|ref|XP_002943632.1|	2.00E-08	PREDICTED: putative inner membrane metabolite transport protein ydfJ-like [Xenopus (Silurana) tropicalis]	sp|P0AEX4|KGTP_SHIFL	1.00E-42	Alpha-ketoglutarate permease OS=Shigella flexneri GN=kgtP PE=3 SV=1	PA0229	6.00E-37	COG0477	Permeases of the major facilitator superfamily
BT_Q_SG_ZJU_Unigene9796	51	0.592	1	--	--	--	--	--	--	--	--	--	--
BT_Q_SG_ZJU_Unigene9812	19	0.803	3	gi|301629365|ref|XP_002943813.1|	2.00E-30	PREDICTED: sulfate transport system permease protein cysW-like [Xenopus (Silurana) tropicalis]	sp|P27370|CYSW_SYNE7	7.00E-25	Sulfate transport system permease protein cysW OS=Synechococcus elongatus (strain PCC 7942) GN=cysW PE=2 SV=1	mlr1668	5.00E-30	COG4208	ABC-type sulfate transport system, permease component
BT_Q_SG_ZJU_Unigene9927	36	0.666	0	--	--	--	--	--	--	CC0794	3.00E-06	COG1344	Flagellin and related hook-associated proteins
BT_Q_SG_ZJU_Unigene9954	18	0.628	0	--	--	--	--	--	--	--	--	--	--
BT_Q_SG_ZJU_Unigene9963	25	0.873	0	gi|195388324|ref|XP_002052830.1|	2.00E-23	GJ17775 [Drosophila virilis] >gi|194149287|gb|EDW64985.1| GJ17775 [Drosophila virilis]	sp|P08570|RLA1_DROME	5.00E-24	60S acidic ribosomal protein P1 OS=Drosophila melanogaster GN=RpLP1 PE=1 SV=2	SPCP1E11.09c	3.00E-11	COG2058	Ribosomal protein L12E/L44/L45/RPP1/RPP2
BT_Q_SG_ZJU_Unigene10028	21	0.96	0	--	--	--	--	--	--	--	--	--	--
BT_Q_SG_ZJU_Unigene10050	36	0.483	1	--	--	--	--	--	--	--	--	--	--
BT_Q_SG_ZJU_Unigene10099	24	0.976	3	gi|301130069|gb|ADK61887.1|	2.00E-45	cytochrome c oxidase subunit I [Homo sapiens] >gi|301130167|gb|ADK61978.1| cytochrome c oxidase subunit I [Homo sapiens]	sp|P00395|COX1_HUMAN	3.00E-46	Cytochrome c oxidase subunit 1 OS=Homo sapiens GN=MT-CO1 PE=1 SV=1	BMEI1465	2.00E-32	COG0843	Heme/copper-type cytochrome/quinol oxidases, subunit 1
BT_Q_SG_ZJU_Unigene10168	19	0.67	0	--	--	--	--	--	--	--	--	--	--
BT_Q_SG_ZJU_Unigene10192	47	0.522	3	gi|239787974|dbj|BAH70685.1|	6.00E-28	ACYPI002634 [Acyrthosiphon pisum]	sp|Q9P0S9|TM14C_HUMAN	3.00E-23	Transmembrane protein 14C OS=Homo sapiens GN=TMEM14C PE=1 SV=1	--	--	--	--
BT_Q_SG_ZJU_Unigene10246	40	0.751	0	--	--	--	--	--	--	--	--	--	--
BT_Q_SG_ZJU_Unigene10266	29	0.953	2	gi|221124500|ref|XP_002166318.1|	4.00E-26	PREDICTED: similar to ATPase, Cu++ transporting, beta polypeptide [Hydra magnipapillata]	sp|Q9X5V3|ATCU_RHILV	2.00E-27	Copper-transporting P-type ATPase OS=Rhizobium leguminosarum bv. viciae GN=actP PE=1 SV=1	SMa1087	8.00E-36	COG2217	Cation transport ATPase
BT_Q_SG_ZJU_Unigene10321	22	0.89	0	gi|301641466|gb|ADK87394.1|	3.00E-49	actin [Psorophora ciliata]	sp|P49871|ACT_MANSE	6.00E-50	Actin, muscle OS=Manduca sexta PE=2 SV=1	SPBC32H8.12c	2.00E-47	COG5277	Actin and related proteins
BT_Q_SG_ZJU_Unigene10352	24	0.762	2	gi|189234051|ref|XP_001809969.1|	2.00E-29	PREDICTED: similar to Na-K-Cl cotransporter [Tribolium castaneum]	sp|Q6A4L1|S12A8_XENLA	1.00E-15	Solute carrier family 12 member 8 OS=Xenopus laevis GN=slc12a8 PE=2 SV=1	--	--	--	--
BT_Q_SG_ZJU_Unigene10464	30	0.457	1	--	--	--	--	--	--	--	--	--	--
BT_Q_SG_ZJU_Unigene10489	29	0.901	0	--	--	--	sp|P06234|NODG_RHIME	1.00E-06	Nodulation protein G OS=Rhizobium meliloti GN=nodG PE=3 SV=1	RC1183	1.00E-07	COG1028	Dehydrogenases with different specificities (related to short-chain alcohol dehydrogenases)
BT_Q_SG_ZJU_Unigene10552	42	0.925	1	gi|115633074|ref|XP_001204414.1|	6.00E-09	PREDICTED: similar to CG3036-PA, partial [Strongylocentrotus purpuratus] >gi|115648123|ref|XP_001198401.1| PREDICTED: similar to CG3036-PA, partial [Strongylocentrotus purpuratus]	--	--	--	PA0241	1.00E-18	COG0477	Permeases of the major facilitator superfamily
BT_Q_SG_ZJU_Unigene10577	20	0.995	1	gi|195130963|ref|XP_002009920.1|	8.00E-29	GI15632 [Drosophila mojavensis] >gi|193908370|gb|EDW07237.1| GI15632 [Drosophila mojavensis]	sp|Q8VI23|S12A8_MOUSE	7.00E-23	Solute carrier family 12 member 8 OS=Mus musculus GN=Slc12a8 PE=2 SV=2	SPBC18H10.16	4.00E-06	COG0531	Amino acid transporters
BT_Q_SG_ZJU_Unigene10723	19	0.969	0	--	--	--	--	--	--	--	--	--	--
BT_Q_SG_ZJU_Unigene10739	24	0.972	0	--	--	--	--	--	--	--	--	--	--
BT_Q_SG_ZJU_Unigene10756	16	0.689	0	--	--	--	--	--	--	--	--	--	--
BT_Q_SG_ZJU_Unigene10783	23	0.697	0	--	--	--	--	--	--	--	--	--	--
BT_Q_SG_ZJU_Unigene10785	22	0.962	3	gi|193631871|ref|XP_001944418.1|	4.00E-34	PREDICTED: similar to CG6006 CG6006-PC [Acyrthosiphon pisum]	sp|Q9VCA2|ORCT_DROME	2.00E-15	Organic cation transporter protein OS=Drosophila melanogaster GN=Orct PE=1 SV=1	araE	6.00E-06	COG0477	Permeases of the major facilitator superfamily
BT_Q_SG_ZJU_Unigene10807	24	1	0	--	--	--	--	--	--	--	--	--	--
BT_Q_SG_ZJU_Unigene10882	21	0.971	0	--	--	--	--	--	--	--	--	--	--
BT_Q_SG_ZJU_Unigene10897	21	0.569	2	gi|195377295|ref|XP_002047426.1|	2.00E-25	GJ13433 [Drosophila virilis] >gi|194154584|gb|EDW69768.1| GJ13433 [Drosophila virilis]	sp|Q95245|CY561_PIG	9.00E-17	Cytochrome b561 OS=Sus scrofa GN=CYB561 PE=2 SV=1	--	--	--	--
BT_Q_SG_ZJU_Unigene10949	22	0.969	0	--	--	--	--	--	--	--	--	--	--
BT_Q_SG_ZJU_Unigene11021	17	0.759	0	--	--	--	sp|Q83QP3|PTFAX_SHIFL	6.00E-13	Multiphosphoryl transfer protein OS=Shigella flexneri GN=fryA PE=3 SV=1	ECs3263_1	2.00E-13	COG1925	Phosphotransferase system, HPr-related proteins
BT_Q_SG_ZJU_Unigene11045	22	0.617	1	--	--	--	--	--	--	--	--	--	--
BT_Q_SG_ZJU_Unigene11146	31	0.682	1	--	--	--	--	--	--	--	--	--	--
BT_Q_SG_ZJU_Unigene11166	27	0.483	2	gi|66562776|ref|XP_625148.1|	6.00E-45	PREDICTED: similar to heixuedian CG5876-PA [Apis mellifera]	sp|Q9V3R8|UBIA1_DROME	2.00E-39	UbiA prenyltransferase domain-containing protein 1 homolog OS=Drosophila melanogaster GN=heix PE=1 SV=1	TM1528	4.00E-14	COG1575	1,4-dihydroxy-2-naphthoate octaprenyltransferase
BT_Q_SG_ZJU_Unigene11207	24	0.503	2	--	--	--	--	--	--	--	--	--	--
BT_Q_SG_ZJU_Unigene11346	21	0.928	0	gi|110762160|ref|XP_001120067.1|	4.00E-26	PREDICTED: similar to CG32069-PA [Apis mellifera]	sp|Q3B8G7|IR3IP_XENLA	3.00E-23	Immediate early response 3-interacting protein 1 OS=Xenopus laevis GN=ier3ip1 PE=3 SV=1	--	--	--	--
BT_Q_SG_ZJU_Unigene11351	17	0.991	0	gi|254679401|gb|ACT78451.1|	4.00E-06	knottin [Bemisia tabaci]	--	--	--	--	--	--	--
BT_Q_SG_ZJU_Unigene11372	20	0.911	3	gi|193587166|ref|XP_001945356.1|	1.00E-20	PREDICTED: similar to Major facilitator superfamily domain-containing protein 9 [Acyrthosiphon pisum]	sp|Q8NBP5|MFSD9_HUMAN	1.00E-12	Major facilitator superfamily domain-containing protein 9 OS=Homo sapiens GN=MFSD9 PE=2 SV=2	DR0472	3.00E-08	COG0477	Permeases of the major facilitator superfamily
BT_Q_SG_ZJU_Unigene11424	20	0.526	0	--	--	--	--	--	--	--	--	--	--
BT_Q_SG_ZJU_Unigene11481	23	0.448	1	--	--	--	--	--	--	--	--	--	--
BT_Q_SG_ZJU_Unigene11528	27	0.699	1	--	--	--	--	--	--	--	--	--	--
BT_Q_SG_ZJU_Unigene11628	55	0.483	0	--	--	--	--	--	--	--	--	--	--
BT_Q_SG_ZJU_Unigene11636	16	0.948	0	gi|66552871|ref|XP_624979.1|	2.00E-33	PREDICTED: similar to coated vesicle membrane protein [Apis mellifera]	sp|A7SXK3|TMED_NEMVE	2.00E-33	Transmembrane emp24 domain-containing protein OS=Nematostella vectensis GN=v1g194562 PE=3 SV=1	--	--	--	--
BT_Q_SG_ZJU_Unigene11666	16	1	0	gi|239788914|dbj|BAH71112.1|	2.00E-27	ACYPI007511 [Acyrthosiphon pisum]	--	--	--	--	--	--	--
BT_Q_SG_ZJU_Unigene11700	23	0.892	0	--	--	--	--	--	--	--	--	--	--
BT_Q_SG_ZJU_Unigene11837	20	0.993	3	gi|119113928|ref|XP_314140.3|	2.00E-20	AGAP005236-PA [Anopheles gambiae str. PEST] >gi|116128355|gb|EAA09398.3| AGAP005236-PA [Anopheles gambiae str. PEST]	sp|Q290X1|R1AP1_DROPS	6.00E-21	RAG1-activating protein 1 homolog OS=Drosophila pseudoobscura pseudoobscura GN=slv PE=3 SV=1	--	--	--	--
BT_Q_SG_ZJU_Unigene11858	20	0.664	0	--	--	--	--	--	--	--	--	--	--
BT_Q_SG_ZJU_Unigene11915	22	0.536	0	--	--	--	--	--	--	--	--	--	--
BT_Q_SG_ZJU_Unigene11925	21	0.989	1	--	--	--	--	--	--	--	--	--	--
BT_Q_SG_ZJU_Unigene11950	17	0.991	0	gi|91082695|ref|XP_971685.1|	2.00E-36	PREDICTED: similar to AGAP007393-PB [Tribolium castaneum]	sp|Q43116|PDI_RICCO	9.00E-22	Protein disulfide-isomerase OS=Ricinus communis PE=2 SV=1	YCL043c	3.00E-18	COG0526	Thiol-disulfide isomerase and thioredoxins
BT_Q_SG_ZJU_Unigene11969	26	0.649	0	gi|48101769|ref|XP_395210.1|	1.00E-43	PREDICTED: similar to TBP-associated factor 8 CG7128-PA [Apis mellifera]	sp|Q9VWY6|TAF8_DROME	9.00E-33	Transcription initiation factor TFIID subunit 8 OS=Drosophila melanogaster GN=Taf8 PE=1 SV=1	--	--	--	--
BT_Q_SG_ZJU_Unigene12034	19	0.576	0	--	--	--	--	--	--	--	--	--	--
BT_Q_SG_ZJU_Unigene12106	27	0.759	3	gi|301607839|ref|XP_002933510.1|	2.00E-16	PREDICTED: protein YIPF7-like [Xenopus (Silurana) tropicalis]	sp|Q5XID0|YIPF5_RAT	1.00E-16	Protein YIPF5 OS=Rattus norvegicus GN=Yipf5 PE=2 SV=1	SPCC61.04c	1.00E-12	COG5080	Rab GTPase interacting factor, Golgi membrane protein
BT_Q_SG_ZJU_Unigene12387	18	0.979	0	gi|239792155|dbj|BAH72451.1|	1.00E-30	ACYPI009796 [Acyrthosiphon pisum]	--	--	--	--	--	--	--
BT_Q_SG_ZJU_Unigene12500	27	0.602	2	gi|58380844|ref|XP_310826.2|	7.00E-10	AGAP000297-PA [Anopheles gambiae str. PEST] >gi|55243516|gb|EAA06508.2| AGAP000297-PA [Anopheles gambiae str. PEST]	--	--	--	--	--	--	--
BT_Q_SG_ZJU_Unigene12505	19	0.853	0	gi|170059923|ref|XP_001865574.1|	2.00E-06	retinol-binding protein [Culex quinquefasciatus] >gi|167878519|gb|EDS41902.1| retinol-binding protein [Culex quinquefasciatus]	--	--	--	--	--	--	--
BT_Q_SG_ZJU_Unigene12579	32	0.986	1	--	--	--	--	--	--	--	--	--	--
BT_Q_SG_ZJU_Unigene12588	18	0.744	0	gi|194859795|ref|XP_001969452.1|	7.00E-27	GG10107 [Drosophila erecta] >gi|190661319|gb|EDV58511.1| GG10107 [Drosophila erecta]	sp|Q8CFY5|COX10_MOUSE	3.00E-15	Protoheme IX farnesyltransferase, mitochondrial OS=Mus musculus GN=Cox10 PE=2 SV=1	--	--	--	--
BT_Q_SG_ZJU_Unigene12740	21	0.701	0	gi|91088497|ref|XP_971106.1|	2.00E-53	PREDICTED: similar to short-chain dehydrogenase [Tribolium castaneum]	sp|Q66KC4|HSDL2_XENTR	9.00E-52	Hydroxysteroid dehydrogenase-like protein 2 OS=Xenopus tropicalis GN=hsdl2 PE=2 SV=1	CC0400	2.00E-45	COG1028	Dehydrogenases with different specificities (related to short-chain alcohol dehydrogenases)
BT_Q_SG_ZJU_Unigene12749	21	0.992	1	gi|156538699|ref|XP_001607791.1|	2.00E-71	PREDICTED: similar to ENSANGP00000014225 [Nasonia vitripennis]	sp|Q9D0F3|LMAN1_MOUSE	6.00E-51	Protein ERGIC-53 OS=Mus musculus GN=Lman1 PE=2 SV=1	--	--	--	--
BT_Q_SG_ZJU_Unigene12755	19	0.986	0	gi|195123388|ref|XP_002006189.1|	5.00E-28	GI18695 [Drosophila mojavensis] >gi|193911257|gb|EDW10124.1| GI18695 [Drosophila mojavensis]	sp|P29094|O16G_BACTR	3.00E-25	Oligo-1,6-glucosidase OS=Bacillus thermoglucosidasius GN=malL PE=1 SV=1	SP0342	8.00E-26	COG0366	Glycosidases
BT_Q_SG_ZJU_Unigene12777	17	0.65	0	--	--	--	--	--	--	--	--	--	--
BT_Q_SG_ZJU_Unigene12786	26	0.98	0	--	--	--	--	--	--	--	--	--	--
BT_Q_SG_ZJU_Unigene12808	23	0.974	4	gi|52220949|ref|YP_086809.1|	5.00E-56	NADH dehydrogenase subunit 6 [Bemisia tabaci] >gi|51944944|gb|AAU14200.1| NADH dehydrogenase subunit 6 [Bemisia tabaci]	sp|P18933|NU6M_DROME	6.00E-09	NADH-ubiquinone oxidoreductase chain 6 OS=Drosophila melanogaster GN=mt:ND6 PE=3 SV=1	--	--	--	--
BT_Q_SG_ZJU_Unigene12826	21	0.822	0	gi|239791803|dbj|BAH72319.1|	5.00E-22	ACYPI008296 [Acyrthosiphon pisum]	sp|Q3SZ84|BOLA3_BOVIN	3.00E-18	BolA-like protein 3 OS=Bos taurus GN=BOLA3 PE=3 SV=1	SPCC4B3.11c	3.00E-12	COG0271	Stress-induced morphogen (activity unknown)
BT_Q_SG_ZJU_Unigene12882	16	0.507	0	--	--	--	--	--	--	--	--	--	--
BT_Q_SG_ZJU_Unigene12942	27	0.78	3	gi|114051900|ref|NP_001040188.1|	2.00E-58	KDEL endoplasmic reticulum protein retention receptor 2 [Bombyx mori] >gi|87248321|gb|ABD36213.1| KDEL endoplasmic reticulum protein retention receptor 2a [Bombyx mori]	sp|Q5ZKX9|ERD22_CHICK	2.00E-56	ER lumen protein retaining receptor 2 OS=Gallus gallus GN=KDELR2 PE=2 SV=1	SPBP8B7.22	2.00E-31	COG5196	ER lumen protein retaining receptor
BT_Q_SG_ZJU_Unigene12978	19	0.767	0	gi|195048918|ref|XP_001992616.1|	9.00E-13	GH24109 [Drosophila grimshawi] >gi|193893457|gb|EDV92323.1| GH24109 [Drosophila grimshawi]	--	--	--	--	--	--	--
BT_Q_SG_ZJU_Unigene13021	17	0.726	1	--	--	--	--	--	--	--	--	--	--
BT_Q_SG_ZJU_Unigene13023	61	0.961	3	gi|156548198|ref|XP_001607014.1|	2.00E-39	PREDICTED: similar to keratinocyte-associated protein 2 [Nasonia vitripennis]	sp|Q1HQF8|KTAP2_AEDAE	9.00E-38	Protein KRTCAP2 homolog OS=Aedes aegypti GN=AAEL007634 PE=2 SV=1	--	--	--	--
BT_Q_SG_ZJU_Unigene13038	14	0.822	0	gi|66501038|ref|XP_623954.1|	2.00E-28	PREDICTED: similar to Signal sequence receptor CG5474-PA [Apis mellifera]	sp|Q5E9E4|SSRB_BOVIN	6.00E-24	Translocon-associated protein subunit beta OS=Bos taurus GN=SSR2 PE=2 SV=1	--	--	--	--
BT_Q_SG_ZJU_Unigene13052	20	0.923	1	gi|158300882|ref|XP_001689283.1|	1.00E-08	AGAP011825-PA [Anopheles gambiae str. PEST] >gi|157013374|gb|EDO63349.1| AGAP011825-PA [Anopheles gambiae str. PEST]	sp|Q8N5G0|CD052_HUMAN	1.00E-07	Uncharacterized protein C4orf52 OS=Homo sapiens GN=C4orf52 PE=1 SV=2	--	--	--	--
BT_Q_SG_ZJU_Unigene13057	18	0.529	0	gi|156550099|ref|XP_001605701.1|	1.00E-11	PREDICTED: similar to GA19292-PA [Nasonia vitripennis]	sp|Q58D08|P5CR3_BOVIN	1.00E-09	Pyrroline-5-carboxylate reductase 3 OS=Bos taurus GN=PYCRL PE=2 SV=1	HI0307	4.00E-06	COG0345	Pyrroline-5-carboxylate reductase
BT_Q_SG_ZJU_Unigene13106	16	0.872	0	gi|110761399|ref|XP_393767.3|	2.00E-62	PREDICTED: similar to CG9386-PA [Apis mellifera]	sp|Q8IYL2|TRM44_HUMAN	6.00E-59	Probable tRNA (uracil-O(2)-)-methyltransferase OS=Homo sapiens GN=C4orf23 PE=2 SV=2	--	--	--	--
BT_Q_SG_ZJU_Unigene13148	29	0.932	3	gi|91091508|ref|XP_969167.1|	9.00E-61	PREDICTED: similar to lipocalin-1 interacting membrane receptor (limr) [Tribolium castaneum]	sp|Q9D1E5|LMBRL_MOUSE	5.00E-37	Protein LMBR1L OS=Mus musculus GN=Lmbr1l PE=2 SV=1	--	--	--	--
BT_Q_SG_ZJU_Unigene13254	18	0.994	0	gi|157106230|ref|XP_001649229.1|	2.00E-50	sulfatase [Aedes aegypti] >gi|108879923|gb|EAT44148.1| sulfatase [Aedes aegypti]	sp|Q8IWU6|SULF1_HUMAN	4.00E-40	Extracellular sulfatase Sulf-1 OS=Homo sapiens GN=SULF1 PE=1 SV=1	yidJ	4.00E-07	COG3119	Arylsulfatase A and related enzymes
BT_Q_SG_ZJU_Unigene13271	36	0.895	2	gi|156541914|ref|XP_001599728.1|	1.00E-31	PREDICTED: similar to ENSANGP00000015128 [Nasonia vitripennis]	sp|Q9VRJ8|U139_DROME	2.00E-29	UPF0139 membrane protein CG10674 OS=Drosophila melanogaster GN=CG10674 PE=1 SV=1	--	--	--	--
BT_Q_SG_ZJU_Unigene13279	29	0.855	0	gi|156551872|ref|XP_001603255.1|	1.00E-24	PREDICTED: similar to GA12600-PA isoform 1 [Nasonia vitripennis] >gi|156551874|ref|XP_001603277.1| PREDICTED: similar to GA12600-PA isoform 2 [Nasonia vitripennis]	sp|Q5R8H3|BAP31_PONAB	3.00E-14	B-cell receptor-associated protein 31 OS=Pongo abelii GN=BCAP31 PE=2 SV=3	--	--	--	--
BT_Q_SG_ZJU_Unigene13282	18	0.508	0	--	--	--	--	--	--	--	--	--	--
BT_Q_SG_ZJU_Unigene13287	17	0.927	2	gi|66553451|ref|XP_392569.2|	2.00E-46	PREDICTED: similar to CG9536-PA [Apis mellifera]	sp|Q12893|TM115_HUMAN	2.00E-32	Transmembrane protein 115 OS=Homo sapiens GN=TMEM115 PE=1 SV=1	--	--	--	--
BT_Q_SG_ZJU_Unigene13348	21	0.89	0	gi|91076512|ref|XP_973316.1|	4.00E-50	PREDICTED: similar to CG9849 CG9849-PA [Tribolium castaneum]	sp|Q9W1W9|PAP21_DROME	3.00E-41	PAP21-like protein OS=Drosophila melanogaster GN=CG9849 PE=2 SV=1	--	--	--	--
BT_Q_SG_ZJU_Unigene13392	21	0.795	1	gi|187177323|ref|NP_001119639.1|	9.00E-12	Sec61 alpha 1 subunit [Acyrthosiphon pisum] >gi|52630957|gb|AAU84942.1| probable transport protein Sec61 alpha subunit [Toxoptera citricida]	sp|Q25147|SC61A_HALRO	4.00E-11	Protein transport protein Sec61 subunit alpha OS=Halocynthia roretzi PE=2 SV=1	--	--	--	--
BT_Q_SG_ZJU_Unigene13472	20	0.869	2	gi|156537001|ref|XP_001608291.1|	4.00E-30	PREDICTED: similar to Vacuolar ATP synthase subunit H [Nasonia vitripennis]	sp|Q20591|VA0E_CAEEL	5.00E-17	V-type proton ATPase subunit e OS=Caenorhabditis elegans GN=vha-17 PE=2 SV=2	--	--	--	--
BT_Q_SG_ZJU_Unigene13489	26	0.887	0	gi|114621341|ref|XP_001135431.1|	6.00E-17	PREDICTED: similar to DC6 [Pan troglodytes]	sp|Q9JIX0|ENY2_MOUSE	4.00E-16	Enhancer of yellow 2 transcription factor homolog OS=Mus musculus GN=Eny2 PE=2 SV=1	--	--	--	--
BT_Q_SG_ZJU_Unigene13503	26	0.589	2	gi|239792742|dbj|BAH72678.1|	2.00E-15	ACYPI003076 [Acyrthosiphon pisum]	--	--	--	--	--	--	--
BT_Q_SG_ZJU_Unigene13506	20	1	0	gi|66516213|ref|XP_624839.1|	4.00E-71	PREDICTED: similar to CG10795-PA [Apis mellifera]	sp|Q9W2H1|TM2D1_DROME	2.00E-60	TM2 domain-containing protein CG10795 OS=Drosophila melanogaster GN=CG10795 PE=2 SV=1	BBU09	5.00E-07	COG2314	Predicted membrane protein
BT_Q_SG_ZJU_Unigene13523	20	0.971	0	gi|126308679|ref|XP_001371078.1|	4.00E-90	PREDICTED: similar to Cant1 protein [Monodelphis domestica]	sp|Q8K4Y7|CANT1_RAT	2.00E-87	Soluble calcium-activated nucleotidase 1 OS=Rattus norvegicus GN=Cant1 PE=1 SV=1	--	--	--	--
BT_Q_SG_ZJU_Unigene13596	23	0.998	4	gi|91081359|ref|XP_971395.1|	1.00E-122	PREDICTED: similar to CG7830 CG7830-PA [Tribolium castaneum]	sp|Q13454|TUSC3_HUMAN	1.00E-102	Tumor suppressor candidate 3 OS=Homo sapiens GN=TUSC3 PE=2 SV=1	--	--	--	--
