# Supplementary material for: Transcriptomic Analysis of the Salivary Glands of an Invasive Whitefly
Source: PLoS One. 2012 Jun 20;7(6):e39303. doi: 10.1371/journal.pone.0039303 (PMC3379992; doi:10.1371/journal.pone.0039303)
Supplement: Table S5 — Unigenes of the whitefly primary salivary glands with similarity to the sequences related to aphid secretory proteins. Predicted protein sequences of the whitefly primary salivary glands were BLAST searched against the set of protein or mRNA sequences associated with aphid saliva or secretome. The unigenes that are homologous to the sequences of the proteins of aphid saliva or secretome (E-value ≤1.0E−5) are shown. The unigenes marked in red are also predicted to be secretory proteins. (XLS) [file pone.0039303.s006.xls]

## Sheet: Sheet1
Gene ID_Whitefly	BLAST	ID_Aphid	E-value	Discription in the Reference
BT_Q_SG_ZJU_Unigene37	tBLASTn	XM_001951605	3e-18	angiotensin converting enzyme[70]
	tBLASTn	XM_001944530	1e-17	angiotensin converting enzyme[70]
BT_Q_SG_ZJU_Unigene413	BLASTp	ACYPI001436-PA	6e-10	similar to sucrase[30]
BT_Q_SG_ZJU_Unigene509	BLASTp	Mp46	3e-17	hypothetical protein LOC100159619[77]
BT_Q_SG_ZJU_Unigene548	tBLASTn	XM_001951605	2e-12	angiotensin converting enzyme[70]
	tBLASTn	XM_001944530	3e-11	angiotensin converting enzyme[70]
BT_Q_SG_ZJU_Unigene1054	BLASTp	ACYPI006669-PA	7e-29	similar to short-chain dehydrogenase, CG30491[30]
	tBLASTn	EC388700	3e-40	none[61]
	tBLASTn	EE572069	3e-24	none[61]
	tBLASTn	EE572101	4e-25	retinol dehydrogenase 13[61]
BT_Q_SG_ZJU_Unigene1090	tBLASTn	EE572069	2e-07	none[61]
	tBLASTn	EE572101	2e-08	retinol dehydrogenase 13[61]
BT_Q_SG_ZJU_Unigene1176	BLASTp	ACYPI001436-PA	1e-30	similar to sucrase[30]
BT_Q_SG_ZJU_Unigene1232	BLASTp	ACYPI009427-PA	2e-17	protease m1 zinc metalloprotease[30]
	tBLASTn	XM_001948813	6e-13	M1 zinc metalloprotease[70]
BT_Q_SG_ZJU_Unigene1498	BLASTp	ACYPI006669-PA	5e-39	similar to short-chain dehydrogenase, CG30491[30]
	tBLASTn	EC388700	7e-51	none[61]
	tBLASTn	EE572069	1e-42	none[61]
	tBLASTn	EE572101	1e-43	retinol dehydrogenase 13[61]
BT_Q_SG_ZJU_Unigene1746	BLASTp	ACYPI001447-PA	2e-06	juvenile hormone esterase[30]
BT_Q_SG_ZJU_Unigene2282	BLASTp	ACYPI009427-PA	1e-15	protease m1 zinc metalloprotease[30]
	tBLASTn	XM_001950011	1e-15	M1 zinc metalloprotease[70]
	tBLASTn	XM_001948813	2e-08	M1 zinc metalloprotease[70]
BT_Q_SG_ZJU_Unigene2350	BLASTp	ACYPI009090-PB	1e-17	peroxiredoxin isoform b[30]
BT_Q_SG_ZJU_Unigene2914	BLASTp	ACYPI001447-PA	2e-06	juvenile hormone esterase[30]
BT_Q_SG_ZJU_Unigene3409	BLASTp	ACYPI001436-PA	8e-08	similar to sucrase[30]
BT_Q_SG_ZJU_Unigene3675	tBLASTn	EE264957	2e-17	NADH dehydrogenase[61]
BT_Q_SG_ZJU_Unigene4074	tBLASTn	XM_001951513	1e-08	SMP-30 (Regucalcin)[70]
BT_Q_SG_ZJU_Unigene4587	BLASTp	ACYPI001436-PA	2e-14	similar to sucrase[30]
BT_Q_SG_ZJU_Unigene4845	BLASTp	ACYPI001436-PA	7e-07	similar to sucrase[30]
BT_Q_SG_ZJU_Unigene5232	BLASTp	Mp12	1e-16	PREDICTED: similar to takeout/JHBP-like protein[77]
BT_Q_SG_ZJU_Unigene5268	BLASTp	Mp43	3e-22	hypothetical protein LOC100165399[77]
BT_Q_SG_ZJU_Unigene5689	BLASTp	ACYPI001436-PA	6e-16	similar to sucrase[30]
	tBLASTn	EE571055	9e-15	alpha-amylase[61]
BT_Q_SG_ZJU_Unigene6683	BLASTp	ACYPI001436-PA	5e-20	similar to sucrase[30]
	tBLASTn	EE571055	4e-19	alpha-amylase[61]
BT_Q_SG_ZJU_Unigene7120	BLASTp	ACYPI001436-PA	3e-21	similar to sucrase[30]
	tBLASTn	EE571055	3e-11	alpha-amylase[61]
BT_Q_SG_ZJU_Unigene7210	BLASTp	Mp11	8e-10	PREDICTED: similar to Neural Lazarillo CG33126-PA[77]
BT_Q_SG_ZJU_Unigene7287	BLASTp	ACYPI009427-PA	1e-10	protease m1 zinc metalloprotease[30]
	tBLASTn	XM_001948813	2e-09	M1 zinc metalloprotease[70]
BT_Q_SG_ZJU_Unigene7470	BLASTp	ACYPI001436-PA	2e-18	similar to sucrase[30]
	tBLASTn	EE571055	1e-12	alpha-amylase[61]
BT_Q_SG_ZJU_Unigene7526	BLASTp	ACYPI001447-PA	1e-19	juvenile hormone esterase[30]
BT_Q_SG_ZJU_Unigene7608	BLASTp	ACYPI001436-PA	5e-13	similar to sucrase[30]
BT_Q_SG_ZJU_Unigene7620	BLASTp	ACYPI001436-PA	1e-09	similar to sucrase[30]
BT_Q_SG_ZJU_Unigene7638	BLASTp	ACYPI001447-PA	2e-15	juvenile hormone esterase[30]
BT_Q_SG_ZJU_Unigene7716	BLASTp	ACYPI009427-PA	6e-10	protease m1 zinc metalloprotease[30]
	tBLASTn	XM_001948813	2e-09	M1 zinc metalloprotease[70]
BT_Q_SG_ZJU_Unigene7725	tBLASTn	XM_001951605	2e-25	angiotensin converting enzyme[70]
	tBLASTn	XM_001944530	2e-24	angiotensin converting enzyme[70]
BT_Q_SG_ZJU_Unigene8322	BLASTp	ACYPI001436-PA	2e-10	similar to sucrase[30]
BT_Q_SG_ZJU_Unigene8668	tBLASTn	XM_001951513	3e-15	SMP-30 (Regucalcin)[70]
BT_Q_SG_ZJU_Unigene9485	BLASTp	ACYPI001447-PA	2e-13	juvenile hormone esterase[30]
BT_Q_SG_ZJU_Unigene9605	BLASTp	ACYPI001436-PA	3e-28	similar to sucrase[30]
	tBLASTn	EE571055	4e-23	alpha-amylase[61]
BT_Q_SG_ZJU_Unigene9752	tBLASTn	EE264957	4e-22	NADH dehydrogenase[61]
BT_Q_SG_ZJU_Unigene9882	BLASTp	ACYPI001447-PA	3e-08	juvenile hormone esterase[30]
BT_Q_SG_ZJU_Unigene9901	BLASTp	ACYPI001436-PA	3e-30	similar to sucrase[30]
BT_Q_SG_ZJU_Unigene10451	BLASTp	Mp43	7e-20	hypothetical protein LOC100165399[77]
BT_Q_SG_ZJU_Unigene11169	BLASTp	ACYPI001436-PA	3e-32	similar to sucrase[30]
	tBLASTn	EE571055	1e-28	alpha-amylase[61]
BT_Q_SG_ZJU_Unigene11343	tBLASTn	XM_001951513	2e-11	SMP-30 (Regucalcin)[70]
BT_Q_SG_ZJU_Unigene11346	BLASTp	Mp3	7e-20	GK11461[77]
BT_Q_SG_ZJU_Unigene12219	BLASTp	ACYPI006669-PA	1e-25	similar to short-chain dehydrogenase, CG30491[30]
	tBLASTn	EC388700	3e-46	none[61]
	tBLASTn	EE572069	6e-46	none[61]
	tBLASTn	EE572101	7e-47	retinol dehydrogenase 13[61]
BT_Q_SG_ZJU_Unigene12234	BLASTp	ACYPI001436-PA	2e-06	similar to sucrase[30]
BT_Q_SG_ZJU_Unigene12318	BLASTp	Mp46	1e-10	hypothetical protein LOC100159619[77]
BT_Q_SG_ZJU_Unigene12321	tBLASTn	XM_001944530	1e-39	angiotensin converting enzyme[70]
BT_Q_SG_ZJU_Unigene12567	BLASTp	ACYPI001436-PA	5e-46	similar to sucrase[30]
	tBLASTn	EE571055	2e-39	alpha-amylase[61]
BT_Q_SG_ZJU_Unigene12640	BLASTp	ACYPI001447-PA	3e-16	juvenile hormone esterase[30]
BT_Q_SG_ZJU_Unigene12732	BLASTp	ACYPI001436-PA	1e-16	similar to sucrase[30]
BT_Q_SG_ZJU_Unigene12740	BLASTp	ACYPI005506-PA	1e-05	hydroxyacyl dehydrogenase isoform 2[30]
BT_Q_SG_ZJU_Unigene12755	BLASTp	ACYPI001436-PA	8e-25	similar to sucrase[30]
	tBLASTn	EE571055	7e-20	alpha-amylase[61]
BT_Q_SG_ZJU_Unigene12756	tBLASTn	XM_001944530	1e-06	angiotensin converting enzyme[70]
	tBLASTn	XM_001951605	4e-06	angiotensin converting enzyme[70]
BT_Q_SG_ZJU_Unigene12998	BLASTp	ACYPI004023-PA	8e-44	similar to ribosomal protein S17, GA18111[30]
BT_Q_SG_ZJU_Unigene13078	tBLASTn	XM_001946910	3e-39	glucose-methanol-choline oxidoreductase[70]
	tBLASTn	EC389056	6e-39	glucose dehydrogenase, glucose oxidase[61]
	tBLASTn	EE262240	6e-39	glucose dehydrogenase, glucose oxidase[61]
	tBLASTn	XM_001952558	1e-38	glucose-methanol-choline oxidoreductase[70]
BT_Q_SG_ZJU_Unigene13092	BLASTp	ACYPI001436-PA	5e-60	similar to sucrase[30]
	tBLASTn	EE571055	1e-54	alpha-amylase[61]
BT_Q_SG_ZJU_Unigene13272	BLASTp	Mp50	4e-32	ACYPI23752[77]
BT_Q_SG_ZJU_Unigene13533	tBLASTn	XM_001944530	2e-52	angiotensin converting enzyme[70]
BT_Q_SG_ZJU_Unigene13578	BLASTp	ACYPI006669-PA	4e-32	similar to short-chain dehydrogenase, CG30491[30]
	tBLASTn	EC388700	7e-37	none[61]
	tBLASTn	EE572069	1e-44	none[61]
	tBLASTn	EE572101	8e-45	retinol dehydrogenase 13[61]
BT_Q_SG_ZJU_Unigene13580	BLASTp	ACYPI001436-PA	1e-39	similar to sucrase[30]
	tBLASTn	EE571055	2e-25	alpha-amylase[61]
