# Supplementary material for: Transcriptomic Analysis of the Salivary Glands of an Invasive Whitefly
Source: PLoS One. 2012 Jun 20;7(6):e39303. doi: 10.1371/journal.pone.0039303 (PMC3379992; doi:10.1371/journal.pone.0039303)
Supplement: Table S6 — Differentially expressed genes in statistical analysis of RPKM value. The gene pairs having ≥150 overlapping region and ≥99% identity are shown. RPKM, FDR-value, fold change (log2 ratio) of gene expression and best hits against nr and Swissprot database (E-value <1.0E−5) for all the gene pairs are also listed in this table. (XLS) [file pone.0039303.s007.xls]

## Sheet: Table S5
Gene ID (Primary Salivary Gland)	Gene ID (Whole Body )	Identity	RPKM (Primary Salivary Gland)	RPKM (Whole Body)	log2 Ratio(Primary Salivary Gland /Whole Body)	Up/Down	p-value	FDR	Nr ID	Nr E-value	Nr Annotation	Swissprot ID	Swissprot E-value	Swissprot Annotation
BT_Q_SG_ZJU_Unigene22	BT_Q_ZJU_Singletons117882	0.9941	9761.1	682.795	3.83752	up	0	0	--	--	--	--	--	--
BT_Q_SG_ZJU_Unigene26	BT_Q_ZJU_Singletons12708	0.9952	1123.54	313.523	1.8414	up	0.000104	0.000456658	--	--	--	--	--	--
BT_Q_SG_ZJU_Unigene39	BT_Q_ZJU_Singletons10467	1	1101.33	169.343	2.70123	up	0	0	--	--	--	--	--	--
BT_Q_SG_ZJU_Unigene44	BT_Q_ZJU_Singletons31610	0.9917	1429.05	318.503	2.16568	up	0	0	gi|71413210|ref|XP_808755.1|	3e-08	mucin-associated surface protein (MASP) [Trypanosoma cruzi strain CL Brener]	sp|A2VD23|STM_DANRE	7e-07	Protein starmaker OS=Danio rerio GN=stm PE=2 SV=1
BT_Q_SG_ZJU_Unigene48	BT_Q_ZJU_Singletons20449	0.9959	3637.58	194.209	4.22729	up	0	0	--	--	--	--	--	--
BT_Q_SG_ZJU_Unigene49	BT_Q_ZJU_Singletons125663	1	2344	470.548	2.31656	up	0	0	--	--	--	--	--	--
BT_Q_SG_ZJU_Unigene59	BT_Q_ZJU_Singletons147692	0.9963	1208.63	412.981	1.54922	up	7.2e-05	0.00032718	--	--	--	--	--	--
BT_Q_SG_ZJU_Unigene94	BT_Q_ZJU_Singletons141741	1	456.592	62.406	2.87115	up	0.000198	0.000813675	gi|189240801|ref|XP_968845.2|	1e-08	PREDICTED: similar to rac-gtp binding protein [Tribolium castaneum]	--	--	--
BT_Q_SG_ZJU_Unigene110	BT_Q_ZJU_Singletons15909	0.9907	918.016	202.242	2.18244	up	0	0	--	--	--	--	--	--
BT_Q_SG_ZJU_Unigene115	BT_Q_ZJU_Singletons35927	1	1364.39	615.472	1.14849	up	0	0	gi|193610574|ref|XP_001947676.1|	3e-93	PREDICTED: similar to RUN domain-containing protein 1 [Acyrthosiphon pisum]	sp|Q96C34|RUND1_HUMAN	4e-30	RUN domain-containing protein 1 OS=Homo sapiens GN=RUNDC1 PE=1 SV=2
BT_Q_SG_ZJU_Unigene199	BT_Q_ZJU_Singletons33339	1	1039.31	2796.62	-1.42806	down	1e-05	5.42e-05	--	--	--	--	--	--
BT_Q_SG_ZJU_Unigene236	BT_Q_ZJU_Singletons26848	1	395.604	1331.48	-1.7509	down	0.00023138	0.000936988	gi|296932843|gb|ADH93567.1|	5e-26	interleukin enhancer binding factor 2 [Epinephelus coioides] >gi|296932845|gb|ADH93568.1| interleukin enhancer binding factor 2 [Epinephelus coioides]	sp|Q6NZ06|ILF2_DANRE	3e-26	Interleukin enhancer-binding factor 2 homolog OS=Danio rerio GN=ilf2 PE=2 SV=1
BT_Q_SG_ZJU_Unigene237	BT_Q_ZJU_Singletons163325	1	1041.54	418.976	1.31377	up	1.6e-05	8.43e-05	--	--	--	--	--	--
BT_Q_SG_ZJU_Unigene263	BT_Q_ZJU_Singletons10999	1	1237.81	252.526	2.29328	up	2e-06	1.26e-05	--	--	--	--	--	--
BT_Q_SG_ZJU_Unigene280	BT_Q_ZJU_Singletons29899	0.9913	1355.38	137.779	3.29826	up	0	0	--	--	--	--	--	--
BT_Q_SG_ZJU_Unigene313	BT_Q_ZJU_Singletons148060	1	857.003	170.819	2.32683	up	4e-06	2.36e-05	--	--	--	--	--	--
BT_Q_SG_ZJU_Unigene343	BT_Q_ZJU_Singletons133263	0.9952	524.317	3341.26	-2.67188	down	3.67e-11	3.24e-10	--	--	--	--	--	--
BT_Q_SG_ZJU_Unigene359	BT_Q_ZJU_Singletons12397	0.9913	683.607	2477.16	-1.85745	down	1.42e-06	9.19e-06	gi|195167180|ref|XP_002024412.1|	2e-24	GL15019 [Drosophila persimilis] >gi|198469081|ref|XP_001354903.2| GA11683 [Drosophila pseudoobscura pseudoobscura] >gi|194107785|gb|EDW29828.1| GL15019 [Drosophila persimilis] >gi|198146707|gb|EAL31959.2| GA11683 [Drosophila pseudoobscura pseudoobscura]	sp|P56213|ALR_MOUSE	3e-22	FAD-linked sulfhydryl oxidase ALR OS=Mus musculus GN=Gfer PE=2 SV=2
BT_Q_SG_ZJU_Unigene362	BT_Q_ZJU_Singletons15521	1	591.981	3689.29	-2.63972	down	1.27e-13	1.19e-12	gi|193617698|ref|XP_001948523.1|	7e-83	PREDICTED: similar to GA18789-PA [Acyrthosiphon pisum]	sp|P48601|PRS4_DROME	2e-81	26S protease regulatory subunit 4 OS=Drosophila melanogaster GN=Pros26.4 PE=1 SV=2
BT_Q_SG_ZJU_Unigene382	BT_Q_ZJU_Singletons8227	0.996	688.802	3085.35	-2.16327	down	5.05e-10	4.17e-09	--	--	--	--	--	--
BT_Q_SG_ZJU_Unigene385	BT_Q_ZJU_Singletons9700	0.9926	1398.43	627.157	1.15691	up	5.4e-05	0.000253684	gi|158296287|ref|XP_316706.4|	1e-22	AGAP006670-PA [Anopheles gambiae str. PEST] >gi|157016439|gb|EAA11416.4| AGAP006670-PA [Anopheles gambiae str. PEST]	sp|Q54LN4|GGHA_DICDI	1e-16	Gamma-glutamyl hydrolase A OS=Dictyostelium discoideum GN=gghA PE=3 SV=1
BT_Q_SG_ZJU_Unigene435	BT_Q_ZJU_Singletons131017	1	774.98	157.56	2.29826	up	0.000156	0.000659282	--	--	--	--	--	--
BT_Q_SG_ZJU_Unigene446	BT_Q_ZJU_Singletons2408	0.9953	145.624	1358.42	-3.22161	down	6.32e-06	3.56e-05	gi|156544680|ref|XP_001605249.1|	2e-26	PREDICTED: similar to G protein pathway suppressor 1 [Nasonia vitripennis]	sp|Q9VVU5|CSN1_DROME	1e-21	COP9 signalosome complex subunit 1b OS=Drosophila melanogaster GN=CSN1b PE=2 SV=1
BT_Q_SG_ZJU_Unigene485	BT_Q_ZJU_Singletons16841	0.9982	1151.07	509.343	1.17627	up	1.6e-05	8.44e-05	--	--	--	--	--	--
BT_Q_SG_ZJU_Unigene495	BT_Q_ZJU_Singletons2742	1	697.482	2576.56	-1.88522	down	3.32e-06	1.99e-05	--	--	--	--	--	--
BT_Q_SG_ZJU_Unigene496	BT_Q_ZJU_Singletons134136	0.9953	1038.69	106.475	3.28619	up	0	0	gi|189236914|ref|XP_969111.2|	1e-39	PREDICTED: similar to alpha-(1,6)-fucosyltransferase [Tribolium castaneum]	sp|Q9VYV5|FUT8_DROME	1e-37	Alpha-(1,6)-fucosyltransferase OS=Drosophila melanogaster GN=FucT6 PE=1 SV=1
BT_Q_SG_ZJU_Unigene500	BT_Q_ZJU_Singletons162944	1	334.262	1319.19	-1.9806	down	6.45e-05	0.000297442	--	--	--	--	--	--
BT_Q_SG_ZJU_Unigene521	BT_Q_ZJU_Singletons162458	0.9958	858.691	134.291	2.67677	up	0	0	--	--	--	--	--	--
BT_Q_SG_ZJU_Unigene561	BT_Q_ZJU_Singletons31284	0.995	657.756	2369.33	-1.84885	down	1.24e-14	1.18e-13	gi|193591799|ref|XP_001948516.1|	1e-101	PREDICTED: similar to AGAP009961-PA [Acyrthosiphon pisum]	sp|Q99KH8|STK24_MOUSE	1e-65	Serine/threonine-protein kinase 24 OS=Mus musculus GN=Stk24 PE=1 SV=1
BT_Q_SG_ZJU_Unigene572	BT_Q_ZJU_Singletons22999	0.9958	456.592	1731.77	-1.92326	down	2.99e-05	0.000148557	--	--	--	--	--	--
BT_Q_SG_ZJU_Unigene575	BT_Q_ZJU_Singletons26994	1	910.151	130.617	2.80076	up	0	0	--	--	--	--	--	--
BT_Q_SG_ZJU_Unigene576	BT_Q_ZJU_Singletons20655	0.9961	548.215	1974.17	-1.84843	down	5.9e-06	3.37e-05	--	--	--	--	--	--
BT_Q_SG_ZJU_Unigene589	BT_Q_ZJU_Singletons5027	0.9921	869.7	2362.51	-1.44173	down	3.12e-05	0.000154621	gi|91089827|ref|XP_969424.1|	1e-70	PREDICTED: similar to AGAP002956-PA [Tribolium castaneum]	sp|Q94535|U2AF1_DROME	1e-70	Splicing factor U2af 38 kDa subunit OS=Drosophila melanogaster GN=U2af38 PE=1 SV=2
BT_Q_SG_ZJU_Unigene592	BT_Q_ZJU_Singletons4716	0.9963	1348.52	266.452	2.33943	up	0	0	--	--	--	--	--	--
BT_Q_SG_ZJU_Unigene621	BT_Q_ZJU_Singletons11938	0.9902	1129.18	5800.69	-2.36094	down	1.4e-23	1.4e-22	--	--	--	--	--	--
BT_Q_SG_ZJU_Unigene630	BT_Q_ZJU_Singletons144953	0.9918	322.111	1810.54	-2.49079	down	5.75e-07	3.88e-06	--	--	--	--	--	--
BT_Q_SG_ZJU_Unigene648	BT_Q_ZJU_Singletons107238	1	1227.81	256.966	2.25644	up	5e-05	0.000237031	--	--	--	--	--	--
BT_Q_SG_ZJU_Unigene679	BT_Q_ZJU_Singletons22176	0.996	691.569	2000	-1.53205	down	7.7e-05	0.000345929	--	--	--	--	--	--
BT_Q_SG_ZJU_Unigene681	BT_Q_ZJU_Singletons6029	0.9965	490.911	2230.96	-2.18413	down	1.41e-08	1.05e-07	gi|239788992|dbj|BAH71146.1|	1e-12	ACYPI006840 [Acyrthosiphon pisum]	sp|Q9VYI3|RM49_DROME	6e-10	Probable 39S ribosomal protein L49, mitochondrial OS=Drosophila melanogaster GN=mRpL49 PE=3 SV=1
BT_Q_SG_ZJU_Unigene720	BT_Q_ZJU_Singletons8428	0.9968	498.554	3929.19	-2.97841	down	8.66e-21	8.57e-20	gi|156549512|ref|XP_001604878.1|	6e-77	PREDICTED: similar to elongation factor tu (ef-tu) [Nasonia vitripennis]	sp|P49411|EFTU_HUMAN	8e-65	Elongation factor Tu, mitochondrial OS=Homo sapiens GN=TUFM PE=1 SV=2
BT_Q_SG_ZJU_Unigene737	BT_Q_ZJU_Singletons134068	1	684.889	93.6089	2.87115	up	0.000198	0.000814478	--	--	--	--	--	--
BT_Q_SG_ZJU_Unigene751	BT_Q_ZJU_Singletons35448	0.992	498.951	2550.94	-2.35406	down	3.28e-09	2.52e-08	--	--	--	--	--	--
BT_Q_SG_ZJU_Unigene766	BT_Q_ZJU_Singletons20336	1	869.7	254.247	1.77429	up	4e-05	0.000193814	gi|91091852|ref|XP_968503.1|	3e-21	PREDICTED: similar to innexin-1 [Tribolium castaneum]	sp|Q9XYN0|INX1_SCHAM	2e-21	Innexin inx1 OS=Schistocerca americana GN=inx1 PE=1 SV=1
BT_Q_SG_ZJU_Unigene783	BT_Q_ZJU_Singletons33120	1	401.4	1747.37	-2.12207	down	6.92e-05	0.00031635	--	--	--	--	--	--
BT_Q_SG_ZJU_Unigene787	BT_Q_ZJU_Singletons125318	0.9943	978.412	117.011	3.0638	up	2e-06	1.24e-05	--	--	--	--	--	--
BT_Q_SG_ZJU_Unigene789	BT_Q_ZJU_Singletons155299	1	1444.32	334.318	2.1111	up	0	0	--	--	--	--	--	--
BT_Q_SG_ZJU_Unigene815	BT_Q_ZJU_Singletons132052	1	763.639	2420.13	-1.66412	down	2.95e-05	0.000146971	gi|110761088|ref|XP_393743.3|	3e-34	PREDICTED: similar to CG5558-PB, isoform B [Apis mellifera]	sp|P53972|YNC2_YEAST	2e-12	Uncharacterized protein YNL022C OS=Saccharomyces cerevisiae GN=YNL022C PE=1 SV=1
BT_Q_SG_ZJU_Unigene822	BT_Q_ZJU_Singletons8196	0.9934	570.201	1803.99	-1.66165	down	1.15e-05	6.18e-05	--	--	--	--	--	--
BT_Q_SG_ZJU_Unigene837	BT_Q_ZJU_Singletons2982	0.9932	583.731	3687.24	-2.65917	down	9.96e-17	9.67e-16	gi|224492639|emb|CAX17290.1|	1e-111	translation initiation factor 2, gamma subunit [Medauroidea extradentata]	sp|Q54XD8|IF2G_DICDI	3e-90	Eukaryotic translation initiation factor 2 subunit 3 OS=Dictyostelium discoideum GN=eif2s3 PE=2 SV=1
BT_Q_SG_ZJU_Unigene838	BT_Q_ZJU_Singletons20146	0.997	616.696	2178.54	-1.82073	down	6.95e-08	5.02e-07	--	--	--	--	--	--
BT_Q_SG_ZJU_Unigene847	BT_Q_ZJU_Singletons33226	1	1034.24	286.73	1.8508	up	4e-06	2.34e-05	gi|193676442|ref|XP_001946968.1|	1e-18	PREDICTED: similar to taz protein (tafazzin) [Acyrthosiphon pisum]	sp|Q9V6G5|TAZ_DROME	3e-13	Tafazzin homolog OS=Drosophila melanogaster GN=Taz PE=1 SV=2
BT_Q_SG_ZJU_Unigene848	BT_Q_ZJU_Singletons149380	0.9959	1159.6	61.6355	4.23372	up	0	0	--	--	--	--	--	--
BT_Q_SG_ZJU_Unigene850	BT_Q_ZJU_Singletons146103	0.9924	239.001	2258.05	-3.23998	down	3.53e-11	3.13e-10	gi|189236619|ref|XP_001816527.1|	4e-80	PREDICTED: similar to n-acetyltransferase [Tribolium castaneum]	sp|Q58ED9|NAA20_DANRE	1e-69	N-alpha-acetyltransferase 20, NatB catalytic subunit OS=Danio rerio GN=naa20 PE=2 SV=1
BT_Q_SG_ZJU_Unigene858	BT_Q_ZJU_Singletons150076	0.9931	433.345	2111.87	-2.28493	down	1.39e-08	1.04e-07	gi|123439308|ref|XP_001310427.1|	2e-19	virulent strain associated lipoprotein [Trichomonas vaginalis G3]	sp|P36044|MNN4_YEAST	1e-18	Protein MNN4 OS=Saccharomyces cerevisiae GN=MNN4 PE=2 SV=2
BT_Q_SG_ZJU_Unigene859	BT_Q_ZJU_Singletons16616	0.9918	731.121	2489.38	-1.7676	down	2.41e-09	1.87e-08	--	--	--	--	--	--
BT_Q_SG_ZJU_Unigene889	BT_Q_ZJU_Singletons160978	1	758.2	122.678	2.6277	up	0	0	--	--	--	--	--	--
BT_Q_SG_ZJU_Unigene899	BT_Q_ZJU_Singletons132920	1	1436.9	208.02	2.78816	up	0	0	gi|156538841|ref|XP_001607999.1|	5e-64	PREDICTED: similar to glucosidase, alpha, acid [Nasonia vitripennis]	sp|Q5R7A9|LYAG_PONAB	3e-41	Lysosomal alpha-glucosidase OS=Pongo abelii GN=GAA PE=2 SV=1
BT_Q_SG_ZJU_Unigene920	BT_Q_ZJU_Singletons133937	1	667.732	2493.28	-1.90071	down	2.59e-06	1.57e-05	gi|119584581|gb|EAW64177.1|	1e-08	hCG2042888, isoform CRA_a [Homo sapiens] >gi|119584582|gb|EAW64178.1| hCG2042888, isoform CRA_a [Homo sapiens] >gi|119584583|gb|EAW64179.1| hCG2042888, isoform CRA_a [Homo sapiens]	sp|Q9D4C5|EAF1_MOUSE	6e-07	ELL-associated factor 1 OS=Mus musculus GN=Eaf1 PE=1 SV=2
BT_Q_SG_ZJU_Unigene933	BT_Q_ZJU_Singletons22398	0.9945	256.633	1636.88	-2.67317	down	2.6e-05	0.000131305	gi|195172784|ref|XP_002027176.1|	1e-20	GL20014 [Drosophila persimilis] >gi|198459487|ref|XP_001361397.2| GA15264 [Drosophila pseudoobscura pseudoobscura] >gi|194112989|gb|EDW35032.1| GL20014 [Drosophila persimilis] >gi|198136706|gb|EAL25975.2| GA15264 [Drosophila pseudoobscura pseudoobscura]	sp|Q9V4N3|CYB5_DROME	1e-20	Cytochrome b5 OS=Drosophila melanogaster GN=Cyt-b5 PE=2 SV=1
BT_Q_SG_ZJU_Unigene935	BT_Q_ZJU_Singletons28477	0.9948	687.67	1639.97	-1.25388	down	0.000101433	0.000445854	gi|110763686|ref|XP_001121108.1|	2e-24	PREDICTED: similar to yantar CG18426-PA [Apis mellifera]	sp|Q6DH74|SNR27_DANRE	1e-15	U4/U6.U5 small nuclear ribonucleoprotein 27 kDa protein OS=Danio rerio GN=snrnp27 PE=2 SV=1
BT_Q_SG_ZJU_Unigene943	BT_Q_ZJU_Singletons29876	1	1164.78	3114.73	-1.41905	down	3.18e-08	2.34e-07	gi|291227356|ref|XP_002733652.1|	3e-13	PREDICTED: Down syndrome critical region protein 2-like [Saccoglossus kowalevskii]	sp|O95456|PSMG1_HUMAN	3e-09	Proteasome assembly chaperone 1 OS=Homo sapiens GN=PSMG1 PE=1 SV=1
BT_Q_SG_ZJU_Unigene945	BT_Q_ZJU_Singletons159919	1	956.882	205.985	2.2158	up	0	0	--	--	--	--	--	--
BT_Q_SG_ZJU_Unigene956	BT_Q_ZJU_Singletons165664	0.9916	689.196	121.672	2.50192	up	0	0	--	--	--	--	--	--
BT_Q_SG_ZJU_Unigene958	BT_Q_ZJU_Singletons24845	1	1043.64	2251.42	-1.10921	down	2.71e-05	0.000136191	--	--	--	--	--	--
BT_Q_SG_ZJU_Unigene962	BT_Q_ZJU_Singletons4300	0.9933	950.684	2188	-1.20257	down	8.69e-10	6.92e-09	--	--	--	--	--	--
BT_Q_SG_ZJU_Unigene973	BT_Q_ZJU_Singletons151880	1	1109.84	104.786	3.40483	up	0	0	--	--	--	--	--	--
BT_Q_SG_ZJU_Unigene978	BT_Q_ZJU_Singletons165793	1	685.603	75.1605	3.18933	up	0	0	--	--	--	--	--	--
BT_Q_SG_ZJU_Unigene979	BT_Q_ZJU_Singletons9036	0.9973	1252.37	484.27	1.37077	up	2e-05	0.000103528	--	--	--	--	--	--
BT_Q_SG_ZJU_Unigene989	BT_Q_ZJU_Singletons33210	1	891.365	159.901	2.47883	up	0	0	--	--	--	--	--	--
BT_Q_SG_ZJU_Unigene1018	BT_Q_ZJU_Singletons28596	0.9913	748.698	2726.87	-1.86479	down	3.45e-07	2.39e-06	--	--	--	--	--	--
BT_Q_SG_ZJU_Unigene1030	BT_Q_ZJU_Singletons1708	0.9906	849.188	2636.06	-1.63423	down	2.73e-10	2.27e-09	--	--	--	--	--	--
BT_Q_SG_ZJU_Unigene1056	BT_Q_ZJU_Singletons21487	0.992	814.039	2830.73	-1.79801	down	1.13e-07	8.02e-07	--	--	--	--	--	--
BT_Q_SG_ZJU_Unigene1065	BT_Q_ZJU_Singletons4235	0.9953	1164.99	3099.98	-1.41194	down	1.33e-05	7.08e-05	gi|156550346|ref|XP_001606975.1|	8e-85	PREDICTED: similar to 26S proteasome regulatory complex subunit RPN11 [Nasonia vitripennis]	sp|O35593|PSDE_MOUSE	3e-82	26S proteasome non-ATPase regulatory subunit 14 OS=Mus musculus GN=Psmd14 PE=1 SV=2
BT_Q_SG_ZJU_Unigene1082	BT_Q_ZJU_Singletons108626	0.9935	1110.97	84.55	3.71587	up	0	0	--	--	--	--	--	--
BT_Q_SG_ZJU_Unigene1095	BT_Q_ZJU_Singletons7791	1	953.58	2295.08	-1.26712	down	2.37e-06	1.44e-05	--	--	--	--	--	--
BT_Q_SG_ZJU_Unigene1096	BT_Q_ZJU_Singletons153772	1	1716.51	57.4792	4.9003	up	0	0	--	--	--	--	--	--
BT_Q_SG_ZJU_Unigene1103	BT_Q_ZJU_Singletons2497	0.9941	1055.88	4101.22	-1.95761	down	1.72e-15	1.66e-14	gi|91088257|ref|XP_966746.1|	1e-165	PREDICTED: similar to proteasome 26S non-ATPase subunit 12 [Tribolium castaneum]	sp|Q5RBI3|PSD12_PONAB	8e-162	26S proteasome non-ATPase regulatory subunit 12 OS=Pongo abelii GN=PSMD12 PE=2 SV=3
BT_Q_SG_ZJU_Unigene1111	BT_Q_ZJU_Singletons16058	0.9902	458.93	2329.55	-2.34371	down	3.99e-10	3.3e-09	--	--	--	--	--	--
BT_Q_SG_ZJU_Unigene1113	BT_Q_ZJU_Singletons13188	0.9982	1034.07	484.362	1.09417	up	0.000116	0.000504564	--	--	--	--	--	--
BT_Q_SG_ZJU_Unigene1123	BT_Q_ZJU_Singletons8616	0.9935	958.029	231.585	2.04853	up	0	0	gi|189235693|ref|XP_966630.2|	1e-112	PREDICTED: similar to AGAP005044-PA [Tribolium castaneum]	sp|Q9CR89|ERGI2_MOUSE	1e-78	Endoplasmic reticulum-Golgi intermediate compartment protein 2 OS=Mus musculus GN=Ergic2 PE=2 SV=1
BT_Q_SG_ZJU_Unigene1139	BT_Q_ZJU_Singletons134150	1	677.362	2133.2	-1.65502	down	8.87e-05	0.000394208	--	--	--	--	--	--
BT_Q_SG_ZJU_Unigene1157	BT_Q_ZJU_Singletons1788	1	941.158	2059.77	-1.12998	down	3.8e-06	2.27e-05	--	--	--	--	--	--
BT_Q_SG_ZJU_Unigene1175	BT_Q_ZJU_Singletons166709	0.9954	574.481	94.4677	2.60436	up	0.000202	0.000828478	gi|66520405|ref|XP_395262.2|	1e-16	PREDICTED: similar to CG9853-PA [Apis mellifera]	sp|Q7L5D6|CG020_HUMAN	1e-14	UPF0363 protein C7orf20 OS=Homo sapiens GN=C7orf20 PE=1 SV=1
BT_Q_SG_ZJU_Unigene1180	BT_Q_ZJU_Singletons159652	0.9964	626.184	2130.88	-1.76679	down	2.04e-06	1.25e-05	--	--	--	--	--	--
BT_Q_SG_ZJU_Unigene1183	BT_Q_ZJU_Singletons164956	1	1045.38	343.806	1.60436	up	0	0	gi|118099658|ref|XP_429506.2|	6e-44	PREDICTED: similar to SJCHGC03982 protein [Gallus gallus]	--	--	--
BT_Q_SG_ZJU_Unigene1187	BT_Q_ZJU_Singletons32736	0.9982	948.763	2733.18	-1.52646	down	1.37e-12	1.26e-11	--	--	--	--	--	--
BT_Q_SG_ZJU_Unigene1200	BT_Q_ZJU_Singletons141210	0.9958	723.532	86.5293	3.0638	up	2e-06	1.26e-05	--	--	--	--	--	--
BT_Q_SG_ZJU_Unigene1219	BT_Q_ZJU_Singletons34662	0.9948	1248.03	2865.05	-1.19891	down	6.46e-10	5.22e-09	gi|91090890|ref|XP_973414.1|	1e-98	PREDICTED: similar to RE62270p [Tribolium castaneum]	sp|Q9I8E6|COPG2_TAKRU	6e-81	Coatomer subunit gamma-2 OS=Takifugu rubripes GN=copg2 PE=3 SV=1
BT_Q_SG_ZJU_Unigene1223	BT_Q_ZJU_Singletons8965	0.9958	1056.85	3507.37	-1.73062	down	1.83e-08	1.36e-07	--	--	--	--	--	--
BT_Q_SG_ZJU_Unigene1231	BT_Q_ZJU_Singletons7385	0.9956	1057.28	3356.87	-1.66676	down	4.58e-14	4.32e-13	gi|111380719|gb|ABH09735.1|	0	heat shock cognate 70 protein [Trichoplusia ni]	sp|P29844|HSP7C_DROME	0	Heat shock 70 kDa protein cognate 3 OS=Drosophila melanogaster GN=Hsc70-3 PE=2 SV=2
BT_Q_SG_ZJU_Unigene1240	BT_Q_ZJU_Singletons140512	1	932.614	71.7005	3.70123	up	0	0	--	--	--	--	--	--
BT_Q_SG_ZJU_Unigene1265	BT_Q_ZJU_Singletons158812	0.9919	757.48	105.688	2.8414	up	0	0	--	--	--	--	--	--
BT_Q_SG_ZJU_Unigene1273	BT_Q_ZJU_Singletons143155	1	1157.08	81.3991	3.82933	up	0	0	--	--	--	--	--	--
BT_Q_SG_ZJU_Unigene1304	BT_Q_ZJU_Singletons166609	0.9981	1022.22	136.222	2.90768	up	0	0	--	--	--	--	--	--
BT_Q_SG_ZJU_Unigene1320	BT_Q_ZJU_Singletons146941	1	331.665	1737.32	-2.38906	down	2.51e-06	1.52e-05	gi|115496001|ref|NP_001068939.1|	8e-28	ankyrin repeat domain-containing protein 39 [Bos taurus] >gi|122142175|sp|Q0P5B9.1|ANR39_BOVIN RecName: Full=Ankyrin repeat domain-containing protein 39 >gi|112362226|gb|AAI20255.1| Ankyrin repeat domain 39 [Bos taurus] >gi|296482796|gb|DAA24911.1| ankyrin repeat domain-containing protein 39 [Bos taurus]	sp|Q0P5B9|ANR39_BOVIN	2e-28	Ankyrin repeat domain-containing protein 39 OS=Bos taurus GN=ANKRD39 PE=2 SV=1
BT_Q_SG_ZJU_Unigene1334	BT_Q_ZJU_Singletons159251	0.9934	1560.26	80.8582	4.27025	up	0	0	--	--	--	--	--	--
BT_Q_SG_ZJU_Unigene1340	BT_Q_ZJU_Singletons29801	1	1220.77	3314.96	-1.4412	down	3.99e-06	2.37e-05	gi|33285936|gb|AAQ01583.1|	6e-08	reverse transcriptase [Aedes albopictus]	sp|P16320|NOF_DROME	1e-06	120.7 kDa protein in NOF-FB transposable element OS=Drosophila melanogaster GN=NOF PE=4 SV=2
BT_Q_SG_ZJU_Unigene1343	BT_Q_ZJU_Singletons16662	0.9943	536.729	2492.67	-2.21543	down	3.08e-06	1.85e-05	--	--	--	--	--	--
BT_Q_SG_ZJU_Unigene1350	BT_Q_ZJU_Singletons16652	1	1107.86	2747.78	-1.31049	down	1.53e-06	9.85e-06	--	--	--	--	--	--
BT_Q_SG_ZJU_Unigene1356	BT_Q_ZJU_Singletons158085	0.9961	849.474	239.465	1.82676	up	0.000186	0.000770439	--	--	--	--	--	--
BT_Q_SG_ZJU_Unigene1366	BT_Q_ZJU_Singletons144554	1	378.74	2008.06	-2.40652	down	1.57e-07	1.11e-06	--	--	--	--	--	--
BT_Q_SG_ZJU_Unigene1401	BT_Q_ZJU_Singletons35654	1	1143.71	199.471	2.51948	up	0	0	--	--	--	--	--	--
BT_Q_SG_ZJU_Unigene1406	BT_Q_ZJU_Singletons28112	1	801.22	140.045	2.51631	up	6e-06	3.41e-05	--	--	--	--	--	--
BT_Q_SG_ZJU_Unigene1423	BT_Q_ZJU_Singletons22928	0.9933	1118.19	2505.49	-1.16393	down	1.41e-10	1.2e-09	gi|156547510|ref|XP_001603936.1|	0	PREDICTED: similar to 26S proteasome regulatory complex ATPase RPT4 [Nasonia vitripennis]	sp|P62335|PRS10_SPETR	0	26S protease regulatory subunit S10B OS=Spermophilus tridecemlineatus GN=PSMC6 PE=2 SV=1
BT_Q_SG_ZJU_Unigene1429	BT_Q_ZJU_Singletons35072	0.9923	752.625	144.014	2.38572	up	0	0	gi|118789164|ref|XP_317248.3|	6e-77	AGAP008224-PA [Anopheles gambiae str. PEST] >gi|45581691|tpg|DAA02245.1| TPA_exp: RAS-like family 11 member A [Anopheles gambiae] >gi|116123090|gb|EAA12476.3| AGAP008224-PA [Anopheles gambiae str. PEST]	sp|Q96A58|RERG_HUMAN	1e-25	Ras-related and estrogen-regulated growth inhibitor OS=Homo sapiens GN=RERG PE=1 SV=1
BT_Q_SG_ZJU_Unigene1451	BT_Q_ZJU_Singletons25231	0.9949	1265.02	2704.26	-1.09608	down	4.01e-06	2.33e-05	--	--	--	--	--	--
BT_Q_SG_ZJU_Unigene1453	BT_Q_ZJU_Singletons36071	0.9988	1084.97	435.606	1.31656	up	0	0	--	--	--	--	--	--
BT_Q_SG_ZJU_Unigene1462	BT_Q_ZJU_Singletons23887	0.9955	710.496	158.611	2.16333	up	0	0	--	--	--	--	--	--
BT_Q_SG_ZJU_Unigene1471	BT_Q_ZJU_Singletons147450	1	753.74	69.34	3.44231	up	0	0	--	--	--	--	--	--
BT_Q_SG_ZJU_Unigene1474	BT_Q_ZJU_Singletons11908	0.992	187.107	1514.15	-3.01658	down	3.95e-07	2.7e-06	--	--	--	--	--	--
BT_Q_SG_ZJU_Unigene1479	BT_Q_ZJU_Singletons5387	0.9915	1070.4	2720.26	-1.34559	down	3.87e-07	2.66e-06	gi|91085239|ref|XP_973002.1|	1e-137	PREDICTED: similar to 26S proteasome subunit [Tribolium castaneum]	sp|B0BN93|PSD13_RAT	9e-110	26S proteasome non-ATPase regulatory subunit 13 OS=Rattus norvegicus GN=Psmd13 PE=1 SV=1
BT_Q_SG_ZJU_Unigene1480	BT_Q_ZJU_Singletons149260	1	1073.78	236.557	2.18244	up	0	0	--	--	--	--	--	--
BT_Q_SG_ZJU_Unigene1484	BT_Q_ZJU_Singletons1814	1	880.995	2966.31	-1.75146	down	2.94e-07	2.05e-06	--	--	--	--	--	--
BT_Q_SG_ZJU_Unigene1498	BT_Q_ZJU_Singletons159041	0.9974	520.485	86.1873	2.59431	up	4e-06	2.34e-05	gi|193654837|ref|XP_001951546.1|	7e-71	PREDICTED: similar to retinol dehydrogenase 11 [Acyrthosiphon pisum]	sp|Q8TC12|RDH11_HUMAN	1e-56	Retinol dehydrogenase 11 OS=Homo sapiens GN=RDH11 PE=1 SV=2
BT_Q_SG_ZJU_Unigene1532	BT_Q_ZJU_Singletons148551	1	313.092	1834.74	-2.55091	down	8.93e-05	0.000396463	gi|291229512|ref|XP_002734712.1|	2e-06	PREDICTED: alanyl-tRNA synthetase-like [Saccoglossus kowalevskii]	sp|P21894|SYAC_BOMMO	1e-05	Alanyl-tRNA synthetase, cytoplasmic OS=Bombyx mori PE=1 SV=1
BT_Q_SG_ZJU_Unigene1545	BT_Q_ZJU_Singletons19073	0.9933	1461.1	49.9248	4.87115	up	0	0	--	--	--	--	--	--
BT_Q_SG_ZJU_Unigene1857	BT_Q_ZJU_Singletons32293	1	1669.82	87.3683	4.25644	up	0	0	--	--	--	--	--	--
BT_Q_SG_ZJU_Unigene1907	BT_Q_ZJU_Singletons145516	1	13788.5	123.985	6.79715	up	0	0	--	--	--	--	--	--
BT_Q_SG_ZJU_Unigene2037	BT_Q_ZJU_Singletons18206	0.9934	207.346	1996.16	-3.26712	down	3.81e-06	2.27e-05	gi|170034336|ref|XP_001845030.1|	3e-18	isocitrate dehydrogenase [Culex quinquefasciatus] >gi|167875663|gb|EDS39046.1| isocitrate dehydrogenase [Culex quinquefasciatus]	sp|Q6XUZ5|IDHC_SHEEP	4e-14	Isocitrate dehydrogenase [NADP] cytoplasmic OS=Ovis aries GN=IDH1 PE=2 SV=1
BT_Q_SG_ZJU_Unigene2072	BT_Q_ZJU_Singletons19857	0.9934	207.346	1549.82	-2.90199	down	0.000139232	0.000595056	--	--	--	--	--	--
BT_Q_SG_ZJU_Unigene2117	BT_Q_ZJU_Singletons2680	0.9934	207.346	2430.11	-3.55091	down	1.06e-07	7.54e-07	gi|156548334|ref|XP_001603220.1|	1e-09	PREDICTED: similar to thioredoxin reductase [Nasonia vitripennis]	sp|Q99MD6|TRXR3_MOUSE	1e-08	Thioredoxin reductase 3 (Fragment) OS=Mus musculus GN=Txnrd3 PE=1 SV=2
BT_Q_SG_ZJU_Unigene2214	BT_Q_ZJU_Singletons160750	1	207.346	1673.8	-3.01302	down	5.18e-05	0.000245429	--	--	--	--	--	--
BT_Q_SG_ZJU_Unigene2292	BT_Q_ZJU_Singletons23293	0.9935	306.953	1847.71	-2.58965	down	6.12e-05	0.000283583	--	--	--	--	--	--
BT_Q_SG_ZJU_Unigene2326	BT_Q_ZJU_Singletons153472	1	1132.9	221.705	2.3533	up	6e-05	0.000279352	--	--	--	--	--	--
BT_Q_SG_ZJU_Unigene2407	BT_Q_ZJU_Singletons149106	1	6241.38	526.168	3.56827	up	0	0	--	--	--	--	--	--
BT_Q_SG_ZJU_Unigene2423	BT_Q_ZJU_Singletons143183	1	306.953	2386.11	-2.95857	down	8.7e-07	5.74e-06	--	--	--	--	--	--
BT_Q_SG_ZJU_Unigene2464	BT_Q_ZJU_Singletons154615	0.9935	609.919	36.471	4.0638	up	2.8e-05	0.000140404	--	--	--	--	--	--
BT_Q_SG_ZJU_Unigene2544	BT_Q_ZJU_Singletons6197	0.9935	201.995	1461.51	-2.85507	down	0.000206128	0.000843748	gi|156547735|ref|XP_001605466.1|	4e-13	PREDICTED: similar to vacuolar ATP synthase subunit h [Nasonia vitripennis]	sp|Q9U5N0|VATH_MANSE	8e-08	V-type proton ATPase subunit H OS=Manduca sexta PE=2 SV=1
BT_Q_SG_ZJU_Unigene2584	BT_Q_ZJU_Singletons141050	0.9934	4325.61	98.5357	5.45611	up	0	0	gi|170050200|ref|XP_001859639.1|	8e-14	deoxyribonuclease I [Culex quinquefasciatus] >gi|167871722|gb|EDS35105.1| deoxyribonuclease I [Culex quinquefasciatus]	--	--	--
BT_Q_SG_ZJU_Unigene2646	BT_Q_ZJU_Singletons21760	1	299.132	1752.93	-2.55091	down	8.93e-05	0.000396041	--	--	--	--	--	--
BT_Q_SG_ZJU_Unigene2647	BT_Q_ZJU_Singletons156755	1	199.422	3315.07	-4.05514	down	1.96e-11	1.76e-10	gi|170053155|ref|XP_001862544.1|	2e-06	mitochondrial ribosomal protein, S30 [Culex quinquefasciatus] >gi|167873799|gb|EDS37182.1| mitochondrial ribosomal protein, S30 [Culex quinquefasciatus]	--	--	--
BT_Q_SG_ZJU_Unigene2683	BT_Q_ZJU_Singletons134717	1	4443.89	1787.63	1.31377	up	0	0	--	--	--	--	--	--
BT_Q_SG_ZJU_Unigene2707	BT_Q_ZJU_Singletons150695	1	1894.51	119.247	3.9898	up	0	0	--	--	--	--	--	--
BT_Q_SG_ZJU_Unigene2843	BT_Q_ZJU_Singletons147997	1	4922.83	259.044	4.24822	up	0	0	--	--	--	--	--	--
BT_Q_SG_ZJU_Unigene2850	BT_Q_ZJU_Singletons163905	1	11913.2	153.071	6.28222	up	0	0	--	--	--	--	--	--
BT_Q_SG_ZJU_Unigene3007	BT_Q_ZJU_Singletons112541	0.9938	3889.34	406.995	3.25644	up	0	0	--	--	--	--	--	--
BT_Q_SG_ZJU_Unigene3068	BT_Q_ZJU_Singletons23878	0.9937	495.399	2073.62	-2.06549	down	0.000127176	0.000549165	--	--	--	--	--	--
BT_Q_SG_ZJU_Unigene3256	BT_Q_ZJU_Singletons151544	1	381.819	1815.1	-2.24909	down	0.00013297	0.000572404	--	--	--	--	--	--
BT_Q_SG_ZJU_Unigene3279	BT_Q_ZJU_Singletons127557	1	1931.41	24.314	6.31172	up	0	0	--	--	--	--	--	--
BT_Q_SG_ZJU_Unigene3417	BT_Q_ZJU_Singletons27460	1	1320.27	214.286	2.62322	up	2e-06	1.23e-05	--	--	--	--	--	--
BT_Q_SG_ZJU_Unigene3518	BT_Q_ZJU_Singletons151540	0.994	6150.02	200.591	4.93827	up	0	0	--	--	--	--	--	--
BT_Q_SG_ZJU_Unigene3657	BT_Q_ZJU_Singletons153889	1	1847.44	81.3991	4.50437	up	0	0	--	--	--	--	--	--
BT_Q_SG_ZJU_Unigene3658	BT_Q_ZJU_Singletons22262	1	1289.2	352.41	1.87115	up	0.000142	0.000605025	--	--	--	--	--	--
BT_Q_SG_ZJU_Unigene3710	BT_Q_ZJU_Singletons145674	1	2117.97	473.551	2.16109	up	0	0	--	--	--	--	--	--
BT_Q_SG_ZJU_Unigene3751	BT_Q_ZJU_Singletons25724	1	3478.8	251.814	3.78816	up	0	0	--	--	--	--	--	--
BT_Q_SG_ZJU_Unigene3755	BT_Q_ZJU_Singletons24302	0.9942	5492.84	54.7421	6.64876	up	0	0	--	--	--	--	--	--
BT_Q_SG_ZJU_Unigene3757	BT_Q_ZJU_Singletons135516	1	2654.87	43.7937	5.92178	up	0	0	--	--	--	--	--	--
BT_Q_SG_ZJU_Unigene3796	BT_Q_ZJU_Singletons4354	0.9941	2130.51	132.936	4.0024	up	0	0	--	--	--	--	--	--
BT_Q_SG_ZJU_Unigene3797	BT_Q_ZJU_Singletons140776	1	4428.6	197.071	4.49006	up	0	0	--	--	--	--	--	--
BT_Q_SG_ZJU_Unigene3816	BT_Q_ZJU_Singletons27212	1	7645.27	1132.02	2.75567	up	0	0	--	--	--	--	--	--
BT_Q_SG_ZJU_Unigene3869	BT_Q_ZJU_Singletons33234	0.9942	271.467	1796.43	-2.72628	down	1.46e-05	7.74e-05	--	--	--	--	--	--
BT_Q_SG_ZJU_Unigene3892	BT_Q_ZJU_Singletons162894	1	1900.27	162.328	3.54922	up	0	0	--	--	--	--	--	--
BT_Q_SG_ZJU_Unigene3893	BT_Q_ZJU_Singletons140734	1	2805.16	1201.22	1.22358	up	8e-05	0.000358452	--	--	--	--	--	--
BT_Q_SG_ZJU_Unigene3918	BT_Q_ZJU_Singletons11985	1	2714.67	995.61	1.44712	up	8e-06	4.44e-05	--	--	--	--	--	--
BT_Q_SG_ZJU_Unigene3924	BT_Q_ZJU_Singletons30484	0.9942	271.467	2186.01	-3.00945	down	4.36e-07	2.97e-06	--	--	--	--	--	--
BT_Q_SG_ZJU_Unigene3972	BT_Q_ZJU_Singletons164616	1	2429.16	398.107	2.60923	up	0	0	--	--	--	--	--	--
BT_Q_SG_ZJU_Unigene4037	BT_Q_ZJU_Singletons141413	1	613.906	48.9459	3.64876	up	7e-05	0.000319485	--	--	--	--	--	--
BT_Q_SG_ZJU_Unigene4053	BT_Q_ZJU_Singletons12920	0.9943	357.819	1893.58	-2.40381	down	2.59e-05	0.000131936	--	--	--	--	--	--
BT_Q_SG_ZJU_Unigene4055	BT_Q_ZJU_Singletons26615	1	1162.91	246.058	2.24067	up	2.8e-05	0.000140067	--	--	--	--	--	--
BT_Q_SG_ZJU_Unigene4069	BT_Q_ZJU_Singletons140465	1	536.729	21.3963	4.64876	up	1e-05	5.43e-05	--	--	--	--	--	--
BT_Q_SG_ZJU_Unigene4137	BT_Q_ZJU_Singletons147159	1	3604.68	73.9018	5.60812	up	0	0	--	--	--	--	--	--
BT_Q_SG_ZJU_Unigene4149	BT_Q_ZJU_Singletons165737	0.9943	30063.9	414.858	6.17927	up	0	0	--	--	--	--	--	--
BT_Q_SG_ZJU_Unigene4206	BT_Q_ZJU_Singletons143200	1	2443.2	205.615	3.57076	up	0	0	--	--	--	--	--	--
BT_Q_SG_ZJU_Unigene4212	BT_Q_ZJU_Singletons9355	1	2299.55	655.791	1.81004	up	0	0	--	--	--	--	--	--
BT_Q_SG_ZJU_Unigene4288	BT_Q_ZJU_Singletons17091	1	351.789	2019.43	-2.52117	down	6.45e-06	3.62e-05	--	--	--	--	--	--
BT_Q_SG_ZJU_Unigene4327	BT_Q_ZJU_Singletons34606	1	1319.21	231.393	2.51126	up	2e-06	1.23e-05	--	--	--	--	--	--
BT_Q_SG_ZJU_Unigene4410	BT_Q_ZJU_Singletons148830	1	173.94	1508.14	-3.11611	down	1.91e-05	9.93e-05	--	--	--	--	--	--
BT_Q_SG_ZJU_Unigene4416	BT_Q_ZJU_Singletons138033	0.9942	819.136	119.732	2.77429	up	4.4e-05	0.000211963	--	--	--	--	--	--
BT_Q_SG_ZJU_Unigene4453	BT_Q_ZJU_Singletons31624	1	4435.47	187.218	4.5663	up	0	0	--	--	--	--	--	--
BT_Q_SG_ZJU_Unigene4482	BT_Q_ZJU_Singletons145198	0.9944	2990.2	157.768	4.24437	up	0	0	--	--	--	--	--	--
BT_Q_SG_ZJU_Unigene4505	BT_Q_ZJU_Singletons27319	1	6630.18	616.718	3.42637	up	0	0	--	--	--	--	--	--
BT_Q_SG_ZJU_Unigene4534	BT_Q_ZJU_Singletons108780	1	908.977	60.3929	3.91179	up	0	0	--	--	--	--	--	--
BT_Q_SG_ZJU_Unigene4544	BT_Q_ZJU_Singletons124828	1	2159.25	236.712	3.18933	up	0	0	--	--	--	--	--	--
BT_Q_SG_ZJU_Unigene4589	BT_Q_ZJU_Singletons23220	1	2150.36	617.202	1.80076	up	2e-06	1.23e-05	--	--	--	--	--	--
BT_Q_SG_ZJU_Unigene4598	BT_Q_ZJU_Singletons8923	0.9938	289.9	2299.78	-2.98787	down	5.86e-07	3.95e-06	--	--	--	--	--	--
BT_Q_SG_ZJU_Unigene4610	BT_Q_ZJU_Singletons924	0.9945	344.057	2293.93	-2.7371	down	3.41e-07	2.37e-06	--	--	--	--	--	--
BT_Q_SG_ZJU_Unigene4670	BT_Q_ZJU_Singletons21508	1	171.088	3539.75	-4.37083	down	1.38e-14	1.31e-13	gi|189234161|ref|XP_967052.2|	4e-25	PREDICTED: similar to jumonji domain containing 1A [Tribolium castaneum]	sp|Q5HZN1|KD3AB_XENLA	9e-22	Lysine-specific demethylase 3A-B OS=Xenopus laevis GN=kdm3a-b PE=2 SV=1
BT_Q_SG_ZJU_Unigene4683	BT_Q_ZJU_Singletons19755	1	471.524	1996.24	-2.08188	down	0.000106933	0.000469044	gi|289739793|gb|ADD18644.1|	2e-22	vacuolar H+-ATPase v1 sector subunit D [Glossina morsitans morsitans]	sp|Q9U0S4|VATD_MANSE	9e-22	V-type proton ATPase subunit D OS=Manduca sexta PE=2 SV=1
BT_Q_SG_ZJU_Unigene4693	BT_Q_ZJU_Singletons165903	1	1881.97	255.762	2.87937	up	0	0	--	--	--	--	--	--
BT_Q_SG_ZJU_Unigene4703	BT_Q_ZJU_Singletons139822	0.9945	6929.08	890.052	2.9607	up	0	0	--	--	--	--	--	--
BT_Q_SG_ZJU_Unigene4792	BT_Q_ZJU_Singletons13057	1	190.91	2146.16	-3.49079	down	2.41e-07	1.69e-06	gi|91089465|ref|XP_968623.1|	7e-10	PREDICTED: similar to CG9246 CG9246-PA [Tribolium castaneum]	sp|Q9VIF0|NOC2L_DROME	5e-07	Nucleolar complex protein 2 homolog OS=Drosophila melanogaster GN=CG9246 PE=1 SV=1
BT_Q_SG_ZJU_Unigene4818	BT_Q_ZJU_Singletons115112	1	5183.64	917.492	2.4982	up	0	0	--	--	--	--	--	--
BT_Q_SG_ZJU_Unigene4824	BT_Q_ZJU_Singletons28370	0.9944	4485.31	683.661	2.71385	up	0	0	--	--	--	--	--	--
BT_Q_SG_ZJU_Unigene4859	BT_Q_ZJU_Singletons6118	1	425.397	1750.08	-2.04054	down	0.000164776	0.000689381	gi|91084687|ref|XP_968830.1|	3e-09	PREDICTED: similar to myotubularin [Tribolium castaneum]	--	--	--
BT_Q_SG_ZJU_Unigene4905	BT_Q_ZJU_Singletons138630	1	1523.15	101.199	3.91179	up	0	0	--	--	--	--	--	--
BT_Q_SG_ZJU_Unigene4924	BT_Q_ZJU_Singletons22014	1	6297.83	75.3175	6.38572	up	0	0	--	--	--	--	--	--
BT_Q_SG_ZJU_Unigene4935	BT_Q_ZJU_Singletons6574	0.9946	252.493	1992.96	-2.9806	down	6.47e-07	4.34e-06	gi|189235274|ref|XP_973290.2|	3e-22	PREDICTED: similar to bat5 hla-b-associated transcript [Tribolium castaneum]	sp|Q6MG55|BAT5_RAT	5e-20	Protein BAT5 OS=Rattus norvegicus GN=Bat5 PE=2 SV=1
BT_Q_SG_ZJU_Unigene4972	BT_Q_ZJU_Singletons138607	1	2333.6	46.5138	5.64876	up	0	0	--	--	--	--	--	--
BT_Q_SG_ZJU_Unigene5009	BT_Q_ZJU_Singletons5024	1	188.61	1624.06	-3.10613	down	2.11e-05	0.000108829	--	--	--	--	--	--
BT_Q_SG_ZJU_Unigene5020	BT_Q_ZJU_Singletons147702	1	251.143	1571.83	-2.64586	down	3.47e-05	0.000170079	--	--	--	--	--	--
BT_Q_SG_ZJU_Unigene5065	BT_Q_ZJU_Singletons152854	1	782.73	124.812	2.64876	up	7.4e-05	0.000334445	--	--	--	--	--	--
BT_Q_SG_ZJU_Unigene5104	BT_Q_ZJU_Singletons26446	0.9947	82.8286	1347.18	-4.02367	down	5.94e-06	3.4e-05	--	--	--	--	--	--
BT_Q_SG_ZJU_Unigene5127	BT_Q_ZJU_Singletons158542	1	5798	148.586	5.28619	up	0	0	--	--	--	--	--	--
BT_Q_SG_ZJU_Unigene5135	BT_Q_ZJU_Singletons132663	0.9947	7868.71	158.491	5.63365	up	0	0	--	--	--	--	--	--
BT_Q_SG_ZJU_Unigene5139	BT_Q_ZJU_Singletons158594	1	1573.74	257.548	2.61128	up	0	0	--	--	--	--	--	--
BT_Q_SG_ZJU_Unigene5191	BT_Q_ZJU_Singletons11210	1	4428.6	98.5357	5.49006	up	0	0	--	--	--	--	--	--
BT_Q_SG_ZJU_Unigene5202	BT_Q_ZJU_Singletons163843	1	331.314	2278.31	-2.78169	down	1.74e-07	1.23e-06	gi|291227543|ref|XP_002733743.1|	3e-26	PREDICTED: adhesion regulating molecule 1-like [Saccoglossus kowalevskii]	sp|Q6P877|ADRM1_XENTR	3e-25	Proteasomal ubiquitin receptor ADRM1 OS=Xenopus tropicalis GN=adrm1 PE=2 SV=1
BT_Q_SG_ZJU_Unigene5229	BT_Q_ZJU_Singletons1738	1	2166.04	777.131	1.47883	up	9.2e-05	0.000406537	--	--	--	--	--	--
BT_Q_SG_ZJU_Unigene5232	BT_Q_ZJU_Singletons5657	1	247.178	1793.35	-2.85904	down	3.11e-06	1.87e-05	gi|193645779|ref|XP_001950683.1|	7e-15	PREDICTED: similar to AGAP012703-PA [Acyrthosiphon pisum]	sp|Q9VBV3|TAKT_DROME	2e-10	Protein takeout OS=Drosophila melanogaster GN=to PE=2 SV=1
BT_Q_SG_ZJU_Unigene5263	BT_Q_ZJU_Singletons26676	1	483.167	2773.6	-2.52117	down	3.61e-07	2.49e-06	--	--	--	--	--	--
BT_Q_SG_ZJU_Unigene5327	BT_Q_ZJU_Singletons159124	1	7048.67	166.634	5.4026	up	0	0	--	--	--	--	--	--
BT_Q_SG_ZJU_Unigene5355	BT_Q_ZJU_Singletons123082	1	311.018	1748.19	-2.49079	down	0.000156828	0.000660771	gi|156552804|ref|XP_001599148.1|	1e-16	PREDICTED: similar to signal recognition particle 14 kDa protein-like protein [Nasonia vitripennis]	sp|P16255|SRP14_CANFA	1e-13	Signal recognition particle 14 kDa protein OS=Canis familiaris GN=SRP14 PE=1 SV=2
BT_Q_SG_ZJU_Unigene5406	BT_Q_ZJU_Singletons23886	1	1630.69	282.777	2.52774	up	0	0	--	--	--	--	--	--
BT_Q_SG_ZJU_Unigene5413	BT_Q_ZJU_Singletons23692	0.9948	244.603	1374.88	-2.49079	down	0.000156828	0.000659437	--	--	--	--	--	--
BT_Q_SG_ZJU_Unigene5421	BT_Q_ZJU_Singletons154695	1	4892.06	146.264	5.0638	up	0	0	--	--	--	--	--	--
BT_Q_SG_ZJU_Unigene5430	BT_Q_ZJU_Singletons131232	1	1981.59	106.643	4.2158	up	0	0	--	--	--	--	--	--
BT_Q_SG_ZJU_Unigene5451	BT_Q_ZJU_Singletons19964	1	1289.2	341.397	1.91695	up	0.000108	0.000472231	--	--	--	--	--	--
BT_Q_SG_ZJU_Unigene5454	BT_Q_ZJU_Singletons10735	1	326.137	1491.89	-2.19359	down	0.00022729	0.000923116	gi|239788565|dbj|BAH70957.1|	1e-24	ACYPI005157 [Acyrthosiphon pisum]	sp|Q6PBD6|WDR61_XENTR	3e-22	WD repeat-containing protein 61 OS=Xenopus tropicalis GN=wdr61 PE=2 SV=1
BT_Q_SG_ZJU_Unigene5472	BT_Q_ZJU_Singletons116255	1	102.991	1441.09	-3.80657	down	4.42e-05	0.000212286	--	--	--	--	--	--
BT_Q_SG_ZJU_Unigene5489	BT_Q_ZJU_Singletons132310	1	13315.4	75.3175	7.46589	up	0	0	--	--	--	--	--	--
BT_Q_SG_ZJU_Unigene5497	BT_Q_ZJU_Singletons28209	0.9948	5434.5	2308.7	1.23507	up	0	0	--	--	--	--	--	--
BT_Q_SG_ZJU_Unigene5537	BT_Q_ZJU_Singletons150324	1	648.895	29.1012	4.47883	up	0	0	--	--	--	--	--	--
BT_Q_SG_ZJU_Unigene5561	BT_Q_ZJU_Singletons133531	1	906.319	118.243	2.93827	up	4e-06	2.34e-05	--	--	--	--	--	--
BT_Q_SG_ZJU_Unigene5571	BT_Q_ZJU_Singletons147747	1	2134.72	74.4617	4.8414	up	0	0	--	--	--	--	--	--
BT_Q_SG_ZJU_Unigene5590	BT_Q_ZJU_Singletons140694	1	2709.45	1104.11	1.29512	up	0.000108	0.000472727	--	--	--	--	--	--
BT_Q_SG_ZJU_Unigene5600	BT_Q_ZJU_Singletons30086	1	322.775	2875.82	-3.15537	down	2.15e-10	1.82e-09	gi|193664630|ref|XP_001945072.1|	3e-19	PREDICTED: similar to GA18135-PA [Acyrthosiphon pisum]	sp|B4JZG8|PESC_DROGR	1e-18	Pescadillo homolog OS=Drosophila grimshawi GN=GH25074 PE=3 SV=1
BT_Q_SG_ZJU_Unigene5609	BT_Q_ZJU_Singletons141745	1	1518.02	90.7723	4.0638	up	0	0	--	--	--	--	--	--
BT_Q_SG_ZJU_Unigene5617	BT_Q_ZJU_Singletons27007	1	403.469	1630.92	-2.01516	down	0.00021322	0.000871066	gi|189241276|ref|XP_974567.2|	5e-10	PREDICTED: similar to CG3983 CG3983-PB [Tribolium castaneum]	sp|Q8MT06|GNL3_DROME	5e-09	Guanine nucleotide-binding protein-like 3 homolog OS=Drosophila melanogaster GN=ns1 PE=1 SV=2
BT_Q_SG_ZJU_Unigene5624	BT_Q_ZJU_Singletons30596	1	6294.12	270.211	4.54184	up	0	0	gi|193586911|ref|XP_001950325.1|	1e-13	PREDICTED: similar to neurotransmitter gated ion channel [Acyrthosiphon pisum]	--	--	--
BT_Q_SG_ZJU_Unigene5654	BT_Q_ZJU_Singletons5531	1	403.469	1621.27	-2.00659	down	0.00023228	0.000939719	gi|156545740|ref|XP_001605233.1|	3e-11	PREDICTED: similar to ENSANGP00000009396 [Nasonia vitripennis]	sp|Q9CR26|VTA1_MOUSE	7e-09	Vacuolar protein sorting-associated protein VTA1 homolog OS=Mus musculus GN=Vta1 PE=1 SV=1
BT_Q_SG_ZJU_Unigene5732	BT_Q_ZJU_Singletons16906	0.9949	240.84	1708.96	-2.82697	down	4.59e-06	2.65e-05	--	--	--	--	--	--
BT_Q_SG_ZJU_Unigene5754	BT_Q_ZJU_Singletons2515	1	239.611	2387.98	-3.31703	down	3.53e-09	2.71e-08	gi|149053626|gb|EDM05443.1|	3e-20	rCG33492 [Rattus norvegicus]	sp|Q61390|TCPW_MOUSE	2e-20	T-complex protein 1 subunit zeta-2 OS=Mus musculus GN=Cct6b PE=2 SV=4
BT_Q_SG_ZJU_Unigene5762	BT_Q_ZJU_Singletons25298	1	4405.78	291.477	3.91795	up	0	0	--	--	--	--	--	--
BT_Q_SG_ZJU_Unigene5791	BT_Q_ZJU_Singletons114714	0.9933	4383.29	162.256	4.75567	up	0	0	--	--	--	--	--	--
BT_Q_SG_ZJU_Unigene5810	BT_Q_ZJU_Singletons116608	1	6802.3	757.787	3.16616	up	0	0	--	--	--	--	--	--
BT_Q_SG_ZJU_Unigene5829	BT_Q_ZJU_Singletons23536	1	556.255	66.5241	3.0638	up	0.000108	0.000473224	--	--	--	--	--	--
BT_Q_SG_ZJU_Unigene5840	BT_Q_ZJU_Singletons123963	1	1796.43	112.535	3.99668	up	0	0	--	--	--	--	--	--
BT_Q_SG_ZJU_Unigene5916	BT_Q_ZJU_Singletons28175	0.9949	4847.36	57.0207	6.40957	up	0	0	--	--	--	--	--	--
BT_Q_SG_ZJU_Unigene5972	BT_Q_ZJU_Singletons27260	1	4790.48	102.305	5.54922	up	0	0	--	--	--	--	--	--
BT_Q_SG_ZJU_Unigene6001	BT_Q_ZJU_Cluster1675	0.995	865.329	2474.29	-1.51569	down	9.61e-05	0.00042392	--	--	--	--	--	--
BT_Q_SG_ZJU_Unigene6020	BT_Q_ZJU_Singletons12162	1	93.1821	1404.13	-3.91348	down	1.71e-05	8.98e-05	gi|91094479|ref|XP_970762.1|	5e-26	PREDICTED: similar to cleavage stimulation factor 64-kDa subunit [Tribolium castaneum]	sp|Q5RDA3|CSTF2_PONAB	6e-26	Cleavage stimulation factor subunit 2 OS=Pongo abelii GN=CSTF2 PE=2 SV=1
BT_Q_SG_ZJU_Unigene6024	BT_Q_ZJU_Singletons135960	1	573.729	49.0099	3.54922	up	2.6e-05	0.000131483	--	--	--	--	--	--
BT_Q_SG_ZJU_Unigene6066	BT_Q_ZJU_Singletons156947	1	235.999	1731.06	-2.8748	down	2.56e-06	1.55e-05	--	--	--	--	--	--
BT_Q_SG_ZJU_Unigene6075	BT_Q_ZJU_Singletons167430	1	234.819	2433.83	-3.37361	down	1.28e-09	1.01e-08	--	--	--	--	--	--
BT_Q_SG_ZJU_Unigene6083	BT_Q_ZJU_Singletons161362	1	4148.47	102.97	5.33229	up	0	0	--	--	--	--	--	--
BT_Q_SG_ZJU_Unigene6140	BT_Q_ZJU_Singletons103	0.995	311.534	1527.55	-2.29376	down	8.47e-05	0.000377699	--	--	--	--	--	--
BT_Q_SG_ZJU_Unigene6186	BT_Q_ZJU_Singletons32694	1	934.603	83.8289	3.47883	up	0	0	--	--	--	--	--	--
BT_Q_SG_ZJU_Unigene6187	BT_Q_ZJU_Singletons150469	1	10030.2	313.898	4.99791	up	0	0	--	--	--	--	--	--
BT_Q_SG_ZJU_Unigene6224	BT_Q_ZJU_Singletons153240	1	8159.37	714.832	3.51278	up	0	0	--	--	--	--	--	--
BT_Q_SG_ZJU_Unigene6231	BT_Q_ZJU_Singletons23531	1	1502.21	378.218	1.9898	up	4e-06	2.36e-05	--	--	--	--	--	--
BT_Q_SG_ZJU_Unigene6259	BT_Q_ZJU_Singletons22731	1	4988.83	277.741	4.16689	up	0	0	--	--	--	--	--	--
BT_Q_SG_ZJU_Unigene6294	BT_Q_ZJU_Singletons149928	1	1156.74	267.454	2.11271	up	1.8e-05	9.42e-05	--	--	--	--	--	--
BT_Q_SG_ZJU_Unigene6310	BT_Q_ZJU_Singletons30399	0.9901	308.465	1696.95	-2.45977	down	1.36e-05	7.2e-05	gi|193713621|ref|XP_001946799.1|	3e-08	PREDICTED: similar to GA19566-PA [Acyrthosiphon pisum]	--	--	--
BT_Q_SG_ZJU_Unigene6340	BT_Q_ZJU_Singletons153431	1	1156.74	304.344	1.92629	up	6e-05	0.00027904	--	--	--	--	--	--
BT_Q_SG_ZJU_Unigene6378	BT_Q_ZJU_Singletons119058	1	723.912	86.5747	3.0638	up	4e-05	0.000194266	--	--	--	--	--	--
BT_Q_SG_ZJU_Unigene6385	BT_Q_ZJU_Singletons159872	0.9951	2071.93	146.838	3.81868	up	0	0	gi|193631925|ref|XP_001947236.1|	3e-22	PREDICTED: similar to subtilisin-related protease SPC3 [Acyrthosiphon pisum]	sp|P29145|NECB_HYDAT	2e-12	PC3-like endoprotease variant B OS=Hydra attenuata PE=2 SV=1
BT_Q_SG_ZJU_Unigene6387	BT_Q_ZJU_Singletons126787	1	5624.41	89.6852	5.97069	up	0	0	--	--	--	--	--	--
BT_Q_SG_ZJU_Unigene6395	BT_Q_ZJU_Singletons7576	1	32383.5	504.754	6.00354	up	0	0	--	--	--	--	--	--
BT_Q_SG_ZJU_Unigene6413	BT_Q_ZJU_Singletons123006	1	2280.8	272.768	3.0638	up	0	0	--	--	--	--	--	--
BT_Q_SG_ZJU_Unigene6429	BT_Q_ZJU_Singletons5962	0.9943	177.893	2542.33	-3.83707	down	1.2e-09	9.5e-09	gi|195390893|ref|XP_002054102.1|	2e-09	GJ22975 [Drosophila virilis] >gi|194152188|gb|EDW67622.1| GJ22975 [Drosophila virilis]	--	--	--
BT_Q_SG_ZJU_Unigene6440	BT_Q_ZJU_Singletons1604	1	460.429	1716.16	-1.89814	down	0.000162492	0.000680506	--	--	--	--	--	--
BT_Q_SG_ZJU_Unigene6464	BT_Q_ZJU_Singletons3667	0.9902	230.215	2505.42	-3.444	down	3.38e-10	2.81e-09	--	--	--	--	--	--
BT_Q_SG_ZJU_Unigene6518	BT_Q_ZJU_Singletons148546	1	187.48	1704.02	-3.18413	down	9.46e-06	5.15e-05	gi|110776820|ref|XP_624980.2|	6e-14	PREDICTED: similar to KDEL (Lys-Asp-Glu-Leu) containing 1 [Apis mellifera]	sp|Q6UW63|KDEL1_HUMAN	6e-13	KDEL motif-containing protein 1 OS=Homo sapiens GN=KDELC1 PE=1 SV=1
BT_Q_SG_ZJU_Unigene6526	BT_Q_ZJU_Singletons152516	1	5395.52	1281.44	2.07399	up	0	0	gi|225713082|gb|ACO12387.1|	8e-27	Signal peptidase complex subunit 3 [Lepeophtheirus salmonis] >gi|290561441|gb|ADD38121.1| Signal peptidase complex subunit 3 [Lepeophtheirus salmonis]	sp|Q9VCA9|SPCS3_DROME	2e-25	Signal peptidase complex subunit 3 OS=Drosophila melanogaster GN=Spase22-23 PE=2 SV=1
BT_Q_SG_ZJU_Unigene6542	BT_Q_ZJU_Singletons142879	1	427.721	1749.41	-2.03213	down	0.000179584	0.00074609	gi|66529639|ref|XP_624926.1|	7e-10	PREDICTED: similar to CG10721-PA [Apis mellifera]	sp|Q3TMV7|PYRD1_MOUSE	6e-08	Pyridine nucleotide-disulfide oxidoreductase domain-containing protein 1 OS=Mus musculus GN=Pyroxd1 PE=2 SV=1
BT_Q_SG_ZJU_Unigene6552	BT_Q_ZJU_Singletons125127	1	3114.09	211.375	3.88093	up	0	0	--	--	--	--	--	--
BT_Q_SG_ZJU_Unigene6603	BT_Q_ZJU_Singletons139701	1	151.986	2444.74	-4.00767	down	5.07e-11	4.43e-10	--	--	--	--	--	--
BT_Q_SG_ZJU_Unigene6619	BT_Q_ZJU_Singletons130710	0.9946	3300.16	1042.35	1.6627	up	0	0	--	--	--	--	--	--
BT_Q_SG_ZJU_Unigene6655	BT_Q_ZJU_Singletons141478	1	2798.16	298.463	3.22886	up	0	0	--	--	--	--	--	--
BT_Q_SG_ZJU_Unigene6666	BT_Q_ZJU_Singletons5939	1	1722.01	346.353	2.31377	up	0	0	--	--	--	--	--	--
BT_Q_SG_ZJU_Unigene6738	BT_Q_ZJU_Singletons8314	1	224.707	2660.46	-3.56556	down	2.87e-11	2.54e-10	--	--	--	--	--	--
BT_Q_SG_ZJU_Unigene6747	BT_Q_ZJU_Singletons125717	1	167.429	2172.53	-3.69776	down	1.2e-08	8.99e-08	--	--	--	--	--	--
BT_Q_SG_ZJU_Unigene6754	BT_Q_ZJU_Singletons13211	0.9952	299.61	2400.69	-3.00229	down	4.25e-09	3.25e-08	gi|66552353|ref|XP_625204.1|	2e-18	PREDICTED: similar to CCR4-NOT transcription complex subunit 2 (CCR4-associated factor 2) [Apis mellifera]	sp|Q94547|RGA_DROME	3e-16	Regulator of gene activity OS=Drosophila melanogaster GN=Rga PE=2 SV=2
BT_Q_SG_ZJU_Unigene6775	BT_Q_ZJU_Singletons126677	1	1071.1	147.804	2.85735	up	0	0	--	--	--	--	--	--
BT_Q_SG_ZJU_Unigene6777	BT_Q_ZJU_Singletons14496	0.9944	2886.04	167.346	4.10819	up	0	0	--	--	--	--	--	--
BT_Q_SG_ZJU_Unigene6799	BT_Q_ZJU_Singletons129135	1	2702.28	89.1514	4.92178	up	0	0	--	--	--	--	--	--
BT_Q_SG_ZJU_Unigene6801	BT_Q_ZJU_Singletons150354	0.9952	8498.21	115.897	6.19625	up	0	0	--	--	--	--	--	--
BT_Q_SG_ZJU_Unigene6802	BT_Q_ZJU_Singletons24978	0.9903	1285.64	180.887	2.82933	up	0	0	--	--	--	--	--	--
BT_Q_SG_ZJU_Unigene6811	BT_Q_ZJU_Singletons6430	1	223.637	2514.07	-3.49079	down	1.34e-10	1.15e-09	gi|195502018|ref|XP_002098041.1|	4e-06	GE24156 [Drosophila yakuba] >gi|194184142|gb|EDW97753.1| GE24156 [Drosophila yakuba]	sp|Q94547|RGA_DROME	2e-06	Regulator of gene activity OS=Drosophila melanogaster GN=Rga PE=2 SV=2
BT_Q_SG_ZJU_Unigene6825	BT_Q_ZJU_Singletons166860	1	519.347	70.9831	2.87115	up	0.000198	0.000815283	--	--	--	--	--	--
BT_Q_SG_ZJU_Unigene6855	BT_Q_ZJU_Singletons159537	0.9905	370.962	1650.36	-2.15343	down	4.87e-05	0.000231355	--	--	--	--	--	--
BT_Q_SG_ZJU_Unigene6877	BT_Q_ZJU_Singletons12030	0.995	471.998	3311.59	-2.81067	down	4.72e-11	4.13e-10	gi|193716016|ref|XP_001951334.1|	2e-07	PREDICTED: similar to protease, reverse transcriptase and RNase H [Acyrthosiphon pisum]	--	--	--
BT_Q_SG_ZJU_Unigene6883	BT_Q_ZJU_Singletons31872	1	274.642	1510.88	-2.45977	down	0.000207434	0.000848261	--	--	--	--	--	--
BT_Q_SG_ZJU_Unigene6884	BT_Q_ZJU_Singletons162542	1	3116.08	124.22	4.64876	up	0	0	--	--	--	--	--	--
BT_Q_SG_ZJU_Unigene6885	BT_Q_ZJU_Singletons110480	0.9937	2476.99	177.738	3.80076	up	0	0	--	--	--	--	--	--
BT_Q_SG_ZJU_Unigene6907	BT_Q_ZJU_Singletons5857	1	3453.22	789.252	2.12938	up	0	0	--	--	--	--	--	--
BT_Q_SG_ZJU_Unigene6932	BT_Q_ZJU_Singletons33655	1	3987.49	141.297	4.81868	up	0	0	--	--	--	--	--	--
BT_Q_SG_ZJU_Unigene6944	BT_Q_ZJU_Singletons114208	1	3054.56	125.573	4.60436	up	0	0	--	--	--	--	--	--
BT_Q_SG_ZJU_Unigene6990	BT_Q_ZJU_Singletons159592	1	5925.34	104.982	5.81868	up	0	0	--	--	--	--	--	--
BT_Q_SG_ZJU_Unigene7014	BT_Q_ZJU_Singletons32841	1	6876.32	192.467	5.15895	up	0	0	--	--	--	--	--	--
BT_Q_SG_ZJU_Unigene7015	BT_Q_ZJU_Singletons165945	1	658.371	113.73	2.53328	up	0.000118	0.000512728	gi|48108726|ref|XP_393098.1|	9e-07	PREDICTED: similar to CG13868-PA [Apis mellifera]	--	--	--
BT_Q_SG_ZJU_Unigene7022	BT_Q_ZJU_Singletons22681	0.9902	381.819	1570.8	-2.04054	down	0.000164776	0.000688689	gi|91087021|ref|XP_974228.1|	5e-30	PREDICTED: similar to peptidyl-prolyl cis-trans isomerase [Tribolium castaneum]	sp|Q503Y7|PIN4_DANRE	1e-29	Peptidyl-prolyl cis-trans isomerase NIMA-interacting 4 OS=Danio rerio GN=pin4 PE=2 SV=1
BT_Q_SG_ZJU_Unigene7036	BT_Q_ZJU_Singletons158656	1	4083.81	235.153	4.11824	up	0	0	--	--	--	--	--	--
BT_Q_SG_ZJU_Unigene7049	BT_Q_ZJU_Singletons125452	1	1729.79	537.864	1.68528	up	3.4e-05	0.000167666	--	--	--	--	--	--
BT_Q_SG_ZJU_Unigene7052	BT_Q_ZJU_Singletons156013	1	321.12	1804.97	-2.49079	down	9.36e-06	5.11e-05	--	--	--	--	--	--
BT_Q_SG_ZJU_Unigene7070	BT_Q_ZJU_Singletons113862	1	1056.45	126.343	3.0638	up	2e-06	1.27e-05	--	--	--	--	--	--
BT_Q_SG_ZJU_Unigene7073	BT_Q_ZJU_Singletons4198	0.9947	3975.77	326.888	3.60436	up	0	0	gi|195114340|ref|XP_002001725.1|	2e-16	GI17007 [Drosophila mojavensis] >gi|193912300|gb|EDW11167.1| GI17007 [Drosophila mojavensis]	sp|Q6PFY8|TRI45_MOUSE	8e-13	Tripartite motif-containing protein 45 OS=Mus musculus GN=Trim45 PE=2 SV=1
BT_Q_SG_ZJU_Unigene7121	BT_Q_ZJU_Singletons158225	1	2754.05	121.345	4.50437	up	0	0	--	--	--	--	--	--
BT_Q_SG_ZJU_Unigene7160	BT_Q_ZJU_Singletons17474	0.9949	321.12	2121.8	-2.72411	down	4.13e-07	2.82e-06	gi|195477202|ref|XP_002100129.1|	4e-09	EG:EG0007.9 [Drosophila yakuba] >gi|194187653|gb|EDX01237.1| EG:EG0007.9 [Drosophila yakuba]	sp|Q9W4M9|NSUN2_DROME	2e-09	tRNA (cytosine-5-)-methyltransferase CG6133 OS=Drosophila melanogaster GN=CG6133 PE=2 SV=1
BT_Q_SG_ZJU_Unigene7199	BT_Q_ZJU_Singletons12057	0.9947	16994	530.618	5.00121	up	0	0	--	--	--	--	--	--
BT_Q_SG_ZJU_Unigene7215	BT_Q_ZJU_Singletons5619	0.9949	319.482	1662.04	-2.37915	down	3.41e-05	0.000167605	--	--	--	--	--	--
BT_Q_SG_ZJU_Unigene7221	BT_Q_ZJU_Singletons26584	1	3469.83	221.959	3.9665	up	0	0	--	--	--	--	--	--
BT_Q_SG_ZJU_Unigene7230	BT_Q_ZJU_Singletons129240	0.9942	2288.68	251.814	3.18409	up	0	0	--	--	--	--	--	--
BT_Q_SG_ZJU_Unigene7234	BT_Q_ZJU_Singletons30420	1	812.267	70.6483	3.52323	up	0	0	--	--	--	--	--	--
BT_Q_SG_ZJU_Unigene7235	BT_Q_ZJU_Singletons155590	1	4506.63	189.109	4.57476	up	0	0	--	--	--	--	--	--
BT_Q_SG_ZJU_Unigene7237	BT_Q_ZJU_Singletons21054	0.9908	288.564	1811.79	-2.65045	down	1.18e-06	7.68e-06	--	--	--	--	--	--
BT_Q_SG_ZJU_Unigene7238	BT_Q_ZJU_Singletons162024	1	933.531	145.996	2.67677	up	2e-06	1.24e-05	--	--	--	--	--	--
BT_Q_SG_ZJU_Unigene7242	BT_Q_ZJU_Singletons162884	0.9908	1867.06	214.699	3.12038	up	0	0	--	--	--	--	--	--
BT_Q_SG_ZJU_Unigene7258	BT_Q_ZJU_Singletons151108	1	646.291	85.8798	2.91179	up	2.6e-05	0.000131963	--	--	--	--	--	--
BT_Q_SG_ZJU_Unigene7267	BT_Q_ZJU_Singletons144340	0.9907	1024.13	52.491	4.28619	up	0	0	--	--	--	--	--	--
BT_Q_SG_ZJU_Unigene7294	BT_Q_ZJU_Singletons17825	0.9908	359.05	2232.87	-2.63664	down	5.51e-08	4.01e-07	--	--	--	--	--	--
BT_Q_SG_ZJU_Unigene7338	BT_Q_ZJU_Singletons128869	1	1517.54	171.935	3.1418	up	0	0	--	--	--	--	--	--
BT_Q_SG_ZJU_Unigene7359	BT_Q_ZJU_Singletons834	1	476.79	2071.75	-2.11943	down	1.15e-05	6.18e-05	gi|157112032|ref|XP_001657383.1|	5e-22	coatomer [Aedes aegypti] >gi|108878214|gb|EAT42439.1| coatomer [Aedes aegypti]	sp|O35142|COPB2_RAT	2e-22	Coatomer subunit beta' OS=Rattus norvegicus GN=Copb2 PE=1 SV=3
BT_Q_SG_ZJU_Unigene7363	BT_Q_ZJU_Singletons133217	1	1138.52	34.0396	5.0638	up	0	0	--	--	--	--	--	--
BT_Q_SG_ZJU_Unigene7377	BT_Q_ZJU_Singletons164181	0.994	281.22	1591.91	-2.50099	down	0.000142833	0.00060795	--	--	--	--	--	--
BT_Q_SG_ZJU_Unigene7410	BT_Q_ZJU_Singletons21516	0.9938	289.9	2357.56	-3.02367	down	3.57e-07	2.47e-06	gi|118782673|ref|XP_312425.3|	3e-27	AGAP002513-PA [Anopheles gambiae str. PEST] >gi|116129679|gb|EAA44922.3| AGAP002513-PA [Anopheles gambiae str. PEST]	sp|Q5PPL2|DCNL5_RAT	6e-24	DCN1-like protein 5 OS=Rattus norvegicus GN=Dcun1d5 PE=2 SV=1
BT_Q_SG_ZJU_Unigene7459	BT_Q_ZJU_Singletons7692	1	775.678	92.7656	3.0638	up	2e-06	1.24e-05	--	--	--	--	--	--
BT_Q_SG_ZJU_Unigene7469	BT_Q_ZJU_Singletons5334	1	282.065	1804.71	-2.67767	down	8.07e-07	5.35e-06	--	--	--	--	--	--
BT_Q_SG_ZJU_Unigene7508	BT_Q_ZJU_Singletons17622	0.9904	449.414	2454.44	-2.44927	down	7.53e-08	5.4e-07	gi|193620207|ref|XP_001945314.1|	4e-08	PREDICTED: similar to CG13096 CG13096-PA, partial [Acyrthosiphon pisum]	sp|A4FV97|RL1D1_BOVIN	3e-06	Ribosomal L1 domain-containing protein 1 OS=Bos taurus GN=RSL1D1 PE=2 SV=1
BT_Q_SG_ZJU_Unigene7548	BT_Q_ZJU_Singletons34380	1	1257.96	275.812	2.18933	up	2e-06	1.23e-05	--	--	--	--	--	--
BT_Q_SG_ZJU_Unigene7560	BT_Q_ZJU_Singletons29808	0.9947	249.807	1483.8	-2.57041	down	7.4e-05	0.000334762	--	--	--	--	--	--
BT_Q_SG_ZJU_Unigene7571	BT_Q_ZJU_Singletons17519	0.9943	4383.29	171.171	4.67851	up	0	0	--	--	--	--	--	--
BT_Q_SG_ZJU_Unigene7582	BT_Q_ZJU_Singletons22514	1	347.88	1680.8	-2.27249	down	1.17e-05	6.28e-05	--	--	--	--	--	--
BT_Q_SG_ZJU_Unigene7583	BT_Q_ZJU_Singletons129866	0.9945	2075.75	51.7176	5.32683	up	0	0	--	--	--	--	--	--
BT_Q_SG_ZJU_Unigene7602	BT_Q_ZJU_Singletons25738	1	1255.72	180.21	2.80076	up	0	0	--	--	--	--	--	--
BT_Q_SG_ZJU_Unigene7642	BT_Q_ZJU_Singletons155163	0.9902	1985.46	82.1932	4.59431	up	0	0	--	--	--	--	--	--
BT_Q_SG_ZJU_Unigene7650	BT_Q_ZJU_Singletons9813	0.9912	551.704	3818.59	-2.79107	down	3.91e-14	3.7e-13	gi|195445589|ref|XP_002070394.1|	7e-23	GK11052 [Drosophila willistoni] >gi|194166479|gb|EDW81380.1| GK11052 [Drosophila willistoni]	sp|Q58DQ5|RT09_BOVIN	4e-20	28S ribosomal protein S9, mitochondrial OS=Bos taurus GN=MRPS9 PE=1 SV=3
BT_Q_SG_ZJU_Unigene7676	BT_Q_ZJU_Singletons25918	1	1379.26	148.455	3.2158	up	0	0	--	--	--	--	--	--
BT_Q_SG_ZJU_Unigene7717	BT_Q_ZJU_Singletons13710	1	451.575	1773.17	-1.97329	down	7.02e-05	0.000319848	gi|193636411|ref|XP_001949488.1|	1e-12	PREDICTED: similar to AGAP010572-PA [Acyrthosiphon pisum]	sp|Q7KN79|LTV1_DROME	2e-10	Protein LTV1 homolog OS=Drosophila melanogaster GN=CG7686 PE=1 SV=1
BT_Q_SG_ZJU_Unigene7720	BT_Q_ZJU_Singletons6344	0.9913	1973.84	463.975	2.08889	up	0	0	--	--	--	--	--	--
BT_Q_SG_ZJU_Unigene7721	BT_Q_ZJU_Singletons165468	1	1441.87	131.381	3.45611	up	0	0	--	--	--	--	--	--
BT_Q_SG_ZJU_Unigene7737	BT_Q_ZJU_Singletons157870	1	480.624	1691.53	-1.81535	down	0.000111835	0.000488489	--	--	--	--	--	--
BT_Q_SG_ZJU_Unigene7756	BT_Q_ZJU_Singletons145415	0.9956	341.803	1618.74	-2.24363	down	1.68e-05	8.83e-05	gi|193586979|ref|XP_001952482.1|	7e-31	PREDICTED: similar to GA14452-PA [Acyrthosiphon pisum]	sp|P41239|CSK_CHICK	9e-23	Tyrosine-protein kinase CSK OS=Gallus gallus GN=CSK PE=2 SV=1
BT_Q_SG_ZJU_Unigene7759	BT_Q_ZJU_Singletons132333	0.9951	5927.47	181.765	5.02727	up	0	0	--	--	--	--	--	--
BT_Q_SG_ZJU_Unigene7821	BT_Q_ZJU_Singletons149247	1	1599.13	372.423	2.10227	up	2e-06	1.25e-05	--	--	--	--	--	--
BT_Q_SG_ZJU_Unigene7847	BT_Q_ZJU_Singletons30705	1	1747.49	374.436	2.22249	up	0	0	--	--	--	--	--	--
BT_Q_SG_ZJU_Unigene7856	BT_Q_ZJU_Singletons19712	1	1029.91	270.973	1.92629	up	6e-05	0.000278109	--	--	--	--	--	--
BT_Q_SG_ZJU_Unigene7872	BT_Q_ZJU_Singletons158112	1	677.688	48.628	3.80076	up	0	0	gi|193697424|ref|XP_001952725.1|	9e-07	PREDICTED: similar to methyl-CpG binding domain protein 6 [Acyrthosiphon pisum]	--	--	--
BT_Q_SG_ZJU_Unigene7881	BT_Q_ZJU_Singletons34318	1	813.226	202.617	2.0049	up	0.000192	0.000792143	gi|187281665|ref|NP_001119722.1|	3e-29	serine/threonine kinase LKB1 [Bombyx mori] >gi|183448420|gb|ACC62888.1| serine/threonine kinase LKB1 [Bombyx mori]	sp|Q0GGW5|STK11_CHICK	3e-27	Serine/threonine-protein kinase 11 OS=Gallus gallus GN=STK11 PE=2 SV=1
BT_Q_SG_ZJU_Unigene7923	BT_Q_ZJU_Singletons28491	1	1619.44	242.092	2.74187	up	0	0	--	--	--	--	--	--
BT_Q_SG_ZJU_Unigene7941	BT_Q_ZJU_Singletons157399	1	632.509	2534.06	-2.00229	down	2.19e-06	1.34e-05	--	--	--	--	--	--
BT_Q_SG_ZJU_Unigene7988	BT_Q_ZJU_Singletons140249	0.9949	802.8	67.2064	3.57837	up	0	0	--	--	--	--	--	--
BT_Q_SG_ZJU_Unigene8002	BT_Q_ZJU_Singletons2977	1	464.988	4939.96	-3.40923	down	6.95e-19	6.81e-18	--	--	--	--	--	--
BT_Q_SG_ZJU_Unigene8012	BT_Q_ZJU_Singletons9371	0.9953	293.983	2056.76	-2.80657	down	1.18e-07	8.39e-07	--	--	--	--	--	--
BT_Q_SG_ZJU_Unigene8033	BT_Q_ZJU_Singletons12985	1	1778.93	365.926	2.28139	up	0	0	--	--	--	--	--	--
BT_Q_SG_ZJU_Unigene8034	BT_Q_ZJU_Singletons142486	1	3953.18	416.04	3.24822	up	0	0	--	--	--	--	--	--
BT_Q_SG_ZJU_Unigene8037	BT_Q_ZJU_Singletons15147	1	364.06	2416.42	-2.73062	down	3.76e-07	2.59e-06	--	--	--	--	--	--
BT_Q_SG_ZJU_Unigene8042	BT_Q_ZJU_Singletons36354	1	2464.77	1091.44	1.17522	up	3.4e-05	0.00016727	--	--	--	--	--	--
BT_Q_SG_ZJU_Unigene8059	BT_Q_ZJU_Singletons141713	1	416.346	2390.02	-2.52117	down	3.61e-07	2.49e-06	gi|156542369|ref|XP_001600536.1|	1e-20	PREDICTED: similar to CG2767-PA [Nasonia vitripennis]	sp|Q5U1Y4|AKCL2_RAT	1e-13	1,5-anhydro-D-fructose reductase OS=Rattus norvegicus GN=Akr1e2 PE=2 SV=1
BT_Q_SG_ZJU_Unigene8064	BT_Q_ZJU_Singletons12463	0.9957	999.23	4971.23	-2.31472	down	1.17e-15	1.13e-14	--	--	--	--	--	--
BT_Q_SG_ZJU_Unigene8080	BT_Q_ZJU_Singletons127888	0.9948	973.343	3492.15	-1.84309	down	1.49e-07	1.05e-06	gi|38328396|gb|AAH62283.1|	1e-08	Zgc:77808 [Danio rerio]	sp|Q6DDA3|MYOV2_XENTR	2e-09	Myeloma-overexpressed gene 2 protein homolog OS=Xenopus tropicalis GN=myeov2 PE=3 SV=1
BT_Q_SG_ZJU_Unigene8082	BT_Q_ZJU_Singletons8455	1	2215.27	512.2	2.11271	up	0	0	--	--	--	--	--	--
BT_Q_SG_ZJU_Unigene8096	BT_Q_ZJU_Singletons150491	1	2820.65	683.092	2.04587	up	0	0	--	--	--	--	--	--
BT_Q_SG_ZJU_Unigene8101	BT_Q_ZJU_Singletons10043	1	6827.34	1525.78	2.16177	up	0	0	--	--	--	--	--	--
BT_Q_SG_ZJU_Unigene8102	BT_Q_ZJU_Singletons13632	1	464.988	2057.54	-2.14566	down	8.13e-06	4.51e-05	gi|193716217|ref|XP_001949010.1|	3e-18	PREDICTED: similar to protein-tyrosine phosphatase, non-receptor type nt5 [Acyrthosiphon pisum]	sp|Q9WU22|PTN4_MOUSE	3e-14	Tyrosine-protein phosphatase non-receptor type 4 OS=Mus musculus GN=Ptpn4 PE=1 SV=1
BT_Q_SG_ZJU_Unigene8104	BT_Q_ZJU_Singletons33402	1	288.564	1863.55	-2.69109	down	6.67e-07	4.47e-06	gi|193652476|ref|XP_001947296.1|	1e-17	PREDICTED: similar to AGAP008497-PA [Acyrthosiphon pisum]	sp|Q640G7|ATG4B_XENLA	1e-13	Cysteine protease ATG4B OS=Xenopus laevis GN=atg4b PE=2 SV=1
BT_Q_SG_ZJU_Unigene8108	BT_Q_ZJU_Singletons125489	1	12222.3	310.361	5.29942	up	0	0	--	--	--	--	--	--
BT_Q_SG_ZJU_Unigene8125	BT_Q_ZJU_Singletons27335	1	4311.65	341.117	3.6599	up	0	0	--	--	--	--	--	--
BT_Q_SG_ZJU_Unigene8145	BT_Q_ZJU_Singletons18607	1	462.372	2993.91	-2.6949	down	2.08e-11	1.86e-10	gi|189235571|ref|XP_001812213.1|	1e-38	PREDICTED: similar to wd-repeat protein [Tribolium castaneum]	sp|Q95RJ9|EBI_DROME	3e-38	F-box-like/WD repeat-containing protein ebi OS=Drosophila melanogaster GN=ebi PE=1 SV=2
BT_Q_SG_ZJU_Unigene8177	BT_Q_ZJU_Singletons151019	0.9957	1905.78	97.6789	4.28619	up	0	0	--	--	--	--	--	--
BT_Q_SG_ZJU_Unigene8183	BT_Q_ZJU_Singletons3971	1	1255.01	323.879	1.95417	up	6e-06	3.41e-05	--	--	--	--	--	--
BT_Q_SG_ZJU_Unigene8188	BT_Q_ZJU_Singletons3344	0.995	865.329	3847.84	-2.15273	down	6.56e-10	5.3e-09	gi|300116730|ref|NP_001177858.1|	2e-07	small nuclear ribonucleoprotein F [Nasonia vitripennis]	sp|Q24297|RUXF_DROME	4e-08	Small nuclear ribonucleoprotein F OS=Drosophila melanogaster GN=DebB PE=1 SV=2
BT_Q_SG_ZJU_Unigene8221	BT_Q_ZJU_Singletons20565	1	1759.98	77.5459	4.50437	up	0	0	--	--	--	--	--	--
BT_Q_SG_ZJU_Unigene8224	BT_Q_ZJU_Singletons20490	1	14668	778.763	4.23534	up	0	0	--	--	--	--	--	--
BT_Q_SG_ZJU_Unigene8229	BT_Q_ZJU_Singletons18641	0.9958	591.981	2839.73	-2.26213	down	2.62e-09	2.03e-08	--	--	--	--	--	--
BT_Q_SG_ZJU_Unigene8246	BT_Q_ZJU_Singletons136083	1	933.531	249.051	1.90625	up	0.000192	0.000792928	--	--	--	--	--	--
BT_Q_SG_ZJU_Unigene8264	BT_Q_ZJU_Singletons14174	1	1244.51	101.834	3.61128	up	0	0	--	--	--	--	--	--
BT_Q_SG_ZJU_Unigene8279	BT_Q_ZJU_Singletons35071	0.9958	720.504	156.668	2.2013	up	0.000126	0.000545215	--	--	--	--	--	--
BT_Q_SG_ZJU_Unigene8317	BT_Q_ZJU_Singletons33196	0.9958	2478.64	351.034	2.81987	up	0	0	--	--	--	--	--	--
BT_Q_SG_ZJU_Unigene8328	BT_Q_ZJU_Singletons7056	1	194.871	1724.58	-3.14566	down	5.95e-08	4.31e-07	--	--	--	--	--	--
BT_Q_SG_ZJU_Unigene8333	BT_Q_ZJU_Singletons131596	1	204.635	2777.68	-3.76275	down	4.22e-09	3.22e-08	gi|194867436|ref|XP_001972071.1|	8e-22	GG14088 [Drosophila erecta] >gi|190653854|gb|EDV51097.1| GG14088 [Drosophila erecta]	sp|Q66HG4|GALM_RAT	1e-15	Aldose 1-epimerase OS=Rattus norvegicus GN=Galm PE=1 SV=1
BT_Q_SG_ZJU_Unigene8339	BT_Q_ZJU_Singletons112605	1	7778.68	186.055	5.38572	up	0	0	--	--	--	--	--	--
BT_Q_SG_ZJU_Unigene8360	BT_Q_ZJU_Singletons114399	1	5536.38	308.225	4.16689	up	0	0	--	--	--	--	--	--
BT_Q_SG_ZJU_Unigene8374	BT_Q_ZJU_Singletons13628	0.9959	259.827	1817.8	-2.80657	down	1.18e-07	8.38e-07	--	--	--	--	--	--
BT_Q_SG_ZJU_Unigene8379	BT_Q_ZJU_Singletons148263	1	1432.45	24.4729	5.87115	up	0	0	--	--	--	--	--	--
BT_Q_SG_ZJU_Unigene8416	BT_Q_ZJU_Singletons127263	0.9948	14916.9	156.832	6.57159	up	0	0	--	--	--	--	--	--
BT_Q_SG_ZJU_Unigene8417	BT_Q_ZJU_Singletons25488	1	388.131	2839.21	-2.87088	down	1.1e-11	9.98e-11	--	--	--	--	--	--
BT_Q_SG_ZJU_Unigene8420	BT_Q_ZJU_Singletons22205	0.9955	423.097	1905.91	-2.17142	down	5.72e-06	3.28e-05	--	--	--	--	--	--
BT_Q_SG_ZJU_Unigene8429	BT_Q_ZJU_Singletons20090	0.9917	517.507	2351.83	-2.18413	down	9.77e-08	6.99e-07	--	--	--	--	--	--
BT_Q_SG_ZJU_Unigene8460	BT_Q_ZJU_Singletons19616	1	3099.92	1112.19	1.47883	up	0	0	gi|66522931|ref|XP_623191.1|	4e-18	PREDICTED: similar to ergic53 CG6822-PA, isoform A isoform 1 [Apis mellifera]	sp|Q62902|LMAN1_RAT	3e-11	Protein ERGIC-53 OS=Rattus norvegicus GN=Lman1 PE=1 SV=1
BT_Q_SG_ZJU_Unigene8475	BT_Q_ZJU_Singletons6887	0.9933	208.728	2159.25	-3.37083	down	1.12e-06	7.32e-06	--	--	--	--	--	--
BT_Q_SG_ZJU_Unigene8486	BT_Q_ZJU_Singletons13591	1	652.275	5101.69	-2.96742	down	1.41e-20	1.4e-19	--	--	--	--	--	--
BT_Q_SG_ZJU_Unigene8487	BT_Q_ZJU_Singletons153	1	384.949	2815.94	-2.87088	down	1.1e-11	9.96e-11	--	--	--	--	--	--
BT_Q_SG_ZJU_Unigene8516	BT_Q_ZJU_Singletons7973	1	384.949	1764.76	-2.19673	down	4.02e-06	2.33e-05	--	--	--	--	--	--
BT_Q_SG_ZJU_Unigene8535	BT_Q_ZJU_Singletons145957	1	10172.2	126.392	6.33058	up	0	0	--	--	--	--	--	--
BT_Q_SG_ZJU_Unigene8568	BT_Q_ZJU_Singletons1418	1	1169.22	163.136	2.8414	up	0	0	--	--	--	--	--	--
BT_Q_SG_ZJU_Unigene8588	BT_Q_ZJU_Singletons153677	1	3818.19	319.64	3.57837	up	0	0	--	--	--	--	--	--
BT_Q_SG_ZJU_Unigene8605	BT_Q_ZJU_Singletons23040	1	1405.72	84.057	4.0638	up	0	0	--	--	--	--	--	--
BT_Q_SG_ZJU_Unigene8609	BT_Q_ZJU_Singletons22667	0.9959	318.183	1301.39	-2.03213	down	0.000179584	0.000747581	--	--	--	--	--	--
BT_Q_SG_ZJU_Unigene8647	BT_Q_ZJU_Singletons117290	1	188.61	2853.38	-3.9192	down	2.75e-10	2.29e-09	--	--	--	--	--	--
BT_Q_SG_ZJU_Unigene8662	BT_Q_ZJU_Singletons4823	0.9958	262.002	2342.18	-3.16021	down	1.95e-10	1.65e-09	gi|156555534|ref|XP_001603205.1|	6e-33	PREDICTED: similar to ferrochelatase [Nasonia vitripennis]	sp|Q9V9S8|HEMH_DROME	2e-29	Ferrochelatase, mitochondrial OS=Drosophila melanogaster GN=Fech PE=2 SV=1
BT_Q_SG_ZJU_Unigene8707	BT_Q_ZJU_Singletons27678	0.996	1194.53	120.301	3.31172	up	0	0	--	--	--	--	--	--
BT_Q_SG_ZJU_Unigene8719	BT_Q_ZJU_Singletons142291	1	1881.56	396.038	2.24822	up	0	0	--	--	--	--	--	--
BT_Q_SG_ZJU_Unigene8730	BT_Q_ZJU_Singletons136939	1	2920.03	1377.46	1.08397	up	0.000132	0.000568815	--	--	--	--	--	--
BT_Q_SG_ZJU_Unigene8746	BT_Q_ZJU_Singletons4380	1	160.56	1344.13	-3.06549	down	3.15e-05	0.000156128	gi|118794372|ref|XP_321442.3|	3e-36	AGAP001653-PA [Anopheles gambiae str. PEST] >gi|116116265|gb|EAA00921.3| AGAP001653-PA [Anopheles gambiae str. PEST]	sp|Q94511|NDUS1_DROME	6e-35	NADH-ubiquinone oxidoreductase 75 kDa subunit, mitochondrial OS=Drosophila melanogaster GN=ND75 PE=2 SV=3
BT_Q_SG_ZJU_Unigene8752	BT_Q_ZJU_Singletons15274	1	563.565	2059.4	-1.86957	down	4.25e-06	2.46e-05	gi|195381197|ref|XP_002049341.1|	5e-22	GJ21531 [Drosophila virilis] >gi|194144138|gb|EDW60534.1| GJ21531 [Drosophila virilis]	sp|Q7TQ35|PARK7_MESAU	2e-22	Protein DJ-1 OS=Mesocricetus auratus GN=PARK7 PE=1 SV=1
BT_Q_SG_ZJU_Unigene8756	BT_Q_ZJU_Singletons1264	1	2379.5	351.97	2.75713	up	0	0	--	--	--	--	--	--
BT_Q_SG_ZJU_Unigene8758	BT_Q_ZJU_Singletons21227	0.9901	619.984	2242.91	-1.85507	down	1.92e-05	9.97e-05	gi|91092056|ref|XP_970271.1|	3e-18	PREDICTED: similar to dihydropyrimidine dehydrogenase [Tribolium castaneum]	sp|Q28943|DPYD_PIG	7e-15	Dihydropyrimidine dehydrogenase [NADP+] OS=Sus scrofa GN=DPYD PE=1 SV=1
BT_Q_SG_ZJU_Unigene8881	BT_Q_ZJU_Singletons1603	1	552.515	2070.41	-1.90583	down	0.000149496	0.000635013	--	--	--	--	--	--
BT_Q_SG_ZJU_Unigene8936	BT_Q_ZJU_Singletons131794	1	3223.01	165.192	4.28619	up	0	0	--	--	--	--	--	--
BT_Q_SG_ZJU_Unigene8992	BT_Q_ZJU_Singletons28889	1	675.296	2496.24	-1.88616	down	2.29e-07	1.61e-06	gi|156551676|ref|XP_001601439.1|	1e-40	PREDICTED: similar to beclin [Nasonia vitripennis]	sp|Q9VCE1|BECN1_DROME	5e-38	Beclin-1-like protein OS=Drosophila melanogaster GN=Atg6 PE=1 SV=1
BT_Q_SG_ZJU_Unigene8995	BT_Q_ZJU_Singletons146641	1	648.415	44.3119	3.87115	up	1.2e-05	6.41e-05	gi|221113525|ref|XP_002168895.1|	2e-13	PREDICTED: similar to F59H6.5 [Hydra magnipapillata]	--	--	--
BT_Q_SG_ZJU_Unigene8998	BT_Q_ZJU_Singletons14623	0.9939	189.753	1736.02	-3.19359	down	8.56e-06	4.73e-05	--	--	--	--	--	--
BT_Q_SG_ZJU_Unigene9033	BT_Q_ZJU_Singletons154265	1	1077.44	151.593	2.82933	up	0	0	--	--	--	--	--	--
BT_Q_SG_ZJU_Unigene9037	BT_Q_ZJU_Singletons29768	1	591.981	2108.17	-1.83237	down	7.53e-06	4.21e-05	--	--	--	--	--	--
BT_Q_SG_ZJU_Unigene9060	BT_Q_ZJU_Singletons11869	0.9961	426.39	1704.63	-1.99921	down	1.09e-05	5.85e-05	gi|193645819|ref|XP_001943033.1|	5e-06	PREDICTED: similar to GA21079-PA [Acyrthosiphon pisum]	sp|Q6NZH4|LIS1_XENTR	3e-06	Lissencephaly-1 homolog OS=Xenopus tropicalis GN=pafah1b1 PE=2 SV=3
BT_Q_SG_ZJU_Unigene9062	BT_Q_ZJU_Singletons31169	1	970.326	177.934	2.44712	up	2e-06	1.25e-05	--	--	--	--	--	--
BT_Q_SG_ZJU_Unigene9078	BT_Q_ZJU_Singletons10389	1	617.945	61.5848	3.32683	up	0.000154	0.000652152	--	--	--	--	--	--
BT_Q_SG_ZJU_Unigene9093	BT_Q_ZJU_Singletons117619	0.9941	2578.4	627.731	2.03826	up	0	0	--	--	--	--	--	--
BT_Q_SG_ZJU_Unigene9111	BT_Q_ZJU_Singletons35210	0.9961	424.737	2314.83	-2.44626	down	5.73e-09	4.35e-08	gi|194758487|ref|XP_001961493.1|	1e-26	GF14996 [Drosophila ananassae] >gi|292630671|sp|B3MLC5.1|DRE2_DROAN RecName: Full=Anamorsin homolog; AltName: Full=Fe-S cluster assembly protein DRE2 homolog >gi|190615190|gb|EDV30714.1| GF14996 [Drosophila ananassae]	sp|B3MLC5|DRE2_DROAN	3e-27	Anamorsin homolog OS=Drosophila ananassae GN=l(2)35Bg PE=3 SV=1
BT_Q_SG_ZJU_Unigene9146	BT_Q_ZJU_Singletons9675	1	3765.03	703.055	2.42095	up	0	0	--	--	--	--	--	--
BT_Q_SG_ZJU_Unigene9182	BT_Q_ZJU_Singletons134855	1	1451.42	49.5941	4.87115	up	0	0	--	--	--	--	--	--
BT_Q_SG_ZJU_Unigene9194	BT_Q_ZJU_Singletons28543	1	4198.28	536.124	2.96916	up	0	0	--	--	--	--	--	--
BT_Q_SG_ZJU_Unigene9199	BT_Q_ZJU_Singletons24110	0.9937	2873.31	106.643	4.75185	up	0	0	--	--	--	--	--	--
BT_Q_SG_ZJU_Unigene9209	BT_Q_ZJU_Singletons2838	1	299.896	1413.1	-2.23633	down	1.84e-05	9.57e-05	gi|91085437|ref|XP_968834.1|	7e-18	PREDICTED: similar to early embryogenesis protein zyg-11 like, ZYGote defective : embryonic lethal ZYG-11 (90.8 kD) (zyg-11) [Tribolium castaneum]	sp|A0JMZ3|ZYG11_XENLA	2e-16	Protein zyg-11 homolog OS=Xenopus laevis GN=zyg-11 PE=2 SV=1
BT_Q_SG_ZJU_Unigene9221	BT_Q_ZJU_Singletons598	1	652.275	2028.19	-1.63664	down	4.35e-05	0.000210077	--	--	--	--	--	--
BT_Q_SG_ZJU_Unigene9236	BT_Q_ZJU_Singletons144816	0.9913	338.844	1410.21	-2.05722	down	0.000138664	0.000594457	--	--	--	--	--	--
BT_Q_SG_ZJU_Unigene9237	BT_Q_ZJU_Singletons14343	1	929.976	222.437	2.0638	up	0.00014	0.000597114	--	--	--	--	--	--
BT_Q_SG_ZJU_Unigene9267	BT_Q_ZJU_Singletons140478	1	425.012	1694.28	-1.9951	down	5.44e-05	0.000255216	gi|241568978|ref|XP_002402619.1|	1e-06	conserved hypothetical protein [Ixodes scapularis] >gi|215500060|gb|EEC09554.1| conserved hypothetical protein [Ixodes scapularis]	--	--	--
BT_Q_SG_ZJU_Unigene9269	BT_Q_ZJU_Singletons24359	0.9958	2311.86	331.779	2.80076	up	0	0	--	--	--	--	--	--
BT_Q_SG_ZJU_Unigene9271	BT_Q_ZJU_Singletons125428	1	16018.7	54.4238	8.2013	up	0	0	--	--	--	--	--	--
BT_Q_SG_ZJU_Unigene9353	BT_Q_ZJU_Singletons8300	0.9962	531.666	1702.62	-1.67917	down	6.5e-05	0.000299218	--	--	--	--	--	--
BT_Q_SG_ZJU_Unigene9359	BT_Q_ZJU_Singletons135819	1	1587.1	422.75	1.90852	up	2e-06	1.26e-05	--	--	--	--	--	--
BT_Q_SG_ZJU_Unigene9372	BT_Q_ZJU_Singletons34434	1	1122.41	268.463	2.0638	up	2e-06	1.27e-05	--	--	--	--	--	--
BT_Q_SG_ZJU_Unigene9390	BT_Q_ZJU_Singletons35600	1	6721.27	183.148	5.19765	up	0	0	gi|193586911|ref|XP_001950325.1|	6e-32	PREDICTED: similar to neurotransmitter gated ion channel [Acyrthosiphon pisum]	sp|P63079|GBRB3_RAT	2e-13	Gamma-aminobutyric acid receptor subunit beta-3 OS=Rattus norvegicus GN=Gabrb3 PE=1 SV=1
BT_Q_SG_ZJU_Unigene9397	BT_Q_ZJU_Singletons5711	0.9962	2412.93	950.166	1.34453	up	2e-06	1.25e-05	gi|193613354|ref|XP_001943445.1|	2e-42	PREDICTED: similar to AGAP008127-PA [Acyrthosiphon pisum]	sp|O02695|PTPR2_MACNE	4e-36	Receptor-type tyrosine-protein phosphatase N2 OS=Macaca nemestrina GN=PTPRN2 PE=2 SV=1
BT_Q_SG_ZJU_Unigene9407	BT_Q_ZJU_Singletons132611	0.9941	920.859	165.192	2.47883	up	6.8e-05	0.000311723	--	--	--	--	--	--
BT_Q_SG_ZJU_Unigene9423	BT_Q_ZJU_Singletons31598	1	5044.26	873.683	2.52946	up	0	0	--	--	--	--	--	--
BT_Q_SG_ZJU_Unigene9449	BT_Q_ZJU_Singletons134611	1	8680.51	745.322	3.54184	up	0	0	--	--	--	--	--	--
BT_Q_SG_ZJU_Unigene9462	BT_Q_ZJU_Singletons11053	0.996	441.864	1781.59	-2.01149	down	9.17e-06	5.02e-05	--	--	--	--	--	--
BT_Q_SG_ZJU_Unigene9506	BT_Q_ZJU_Singletons4173	1	561.96	2294.62	-2.02972	down	7.1e-06	3.98e-05	gi|193697490|ref|XP_001945902.1|	4e-40	PREDICTED: similar to protein phosphatase 1, catalytic subunit, alpha [Acyrthosiphon pisum]	sp|Q05547|PP13_DROME	3e-40	Serine/threonine-protein phosphatase alpha-3 isoform OS=Drosophila melanogaster GN=Pp1-13C PE=1 SV=1
BT_Q_SG_ZJU_Unigene9508	BT_Q_ZJU_Singletons22872	0.9963	581.955	118.316	2.29826	up	0.000156	0.000658614	--	--	--	--	--	--
BT_Q_SG_ZJU_Unigene9509	BT_Q_ZJU_Singletons135371	1	2156.02	213.002	3.33943	up	0	0	--	--	--	--	--	--
BT_Q_SG_ZJU_Unigene9513	BT_Q_ZJU_Singletons11728	0.9958	1500.23	538.251	1.47883	up	6.4e-05	0.000295663	--	--	--	--	--	--
BT_Q_SG_ZJU_Unigene9532	BT_Q_ZJU_Singletons5318	1	320.791	1618.97	-2.33537	down	5.21e-06	3e-05	--	--	--	--	--	--
BT_Q_SG_ZJU_Unigene9551	BT_Q_ZJU_Singletons119369	0.9938	14098.9	325.596	5.43635	up	0	0	--	--	--	--	--	--
BT_Q_SG_ZJU_Unigene9561	BT_Q_ZJU_Singletons21392	0.996	1073.1	135.884	2.98133	up	0	0	--	--	--	--	--	--
BT_Q_SG_ZJU_Unigene9581	BT_Q_ZJU_Singletons16633	1	1519.22	481.869	1.65662	up	1.2e-05	6.4e-05	--	--	--	--	--	--
BT_Q_SG_ZJU_Unigene9588	BT_Q_ZJU_Singletons157982	0.9926	2021.81	248.703	3.02315	up	0	0	--	--	--	--	--	--
BT_Q_SG_ZJU_Unigene9591	BT_Q_ZJU_Singletons138129	1	1354.72	144.014	3.23372	up	0	0	--	--	--	--	--	--
BT_Q_SG_ZJU_Unigene9599	BT_Q_ZJU_Singletons11397	1	3747.11	368.461	3.3462	up	0	0	--	--	--	--	--	--
BT_Q_SG_ZJU_Unigene9604	BT_Q_ZJU_Singletons843	0.9926	519.894	1692.56	-1.70292	down	4.75e-05	0.000225902	gi|156548362|ref|XP_001603752.1|	2e-21	PREDICTED: similar to SJCHGC05576 protein [Nasonia vitripennis]	--	--	--
BT_Q_SG_ZJU_Unigene9607	BT_Q_ZJU_Singletons6986	1	2415.28	663.286	1.86449	up	0	0	--	--	--	--	--	--
BT_Q_SG_ZJU_Unigene9648	BT_Q_ZJU_Singletons32738	0.9953	741.924	2324.7	-1.6477	down	3.72e-05	0.000182582	gi|91085415|ref|XP_967672.1|	2e-23	PREDICTED: similar to CG11166 CG11166-PD [Tribolium castaneum]	sp|B4MR74|EAF_DROWI	2e-17	Ell-associated factor Eaf OS=Drosophila willistoni GN=Eaf PE=3 SV=1
BT_Q_SG_ZJU_Unigene9653	BT_Q_ZJU_Singletons148854	1	2398.69	166.08	3.85229	up	0	0	--	--	--	--	--	--
BT_Q_SG_ZJU_Unigene9658	BT_Q_ZJU_Singletons150752	1	599.538	2190.85	-1.86957	down	4.25e-06	2.46e-05	gi|91080663|ref|XP_974713.1|	2e-49	PREDICTED: similar to Noa36 CG10009-PA [Tribolium castaneum]	sp|Q9VAU9|ZN330_DROME	1e-48	Zinc finger protein 330 homolog OS=Drosophila melanogaster GN=Noa36 PE=1 SV=1
BT_Q_SG_ZJU_Unigene9674	BT_Q_ZJU_Singletons380	0.9941	368.343	2323.7	-2.6573	down	1.07e-06	7.04e-06	gi|91077326|ref|XP_974776.1|	3e-17	PREDICTED: similar to GA19292-PA [Tribolium castaneum]	sp|P74572|P5CR_SYNY3	1e-11	Pyrroline-5-carboxylate reductase OS=Synechocystis sp. (strain PCC 6803) GN=proC PE=3 SV=1
BT_Q_SG_ZJU_Unigene9694	BT_Q_ZJU_Singletons125755	0.9947	1249.04	239.002	2.38572	up	2e-06	1.27e-05	--	--	--	--	--	--
BT_Q_SG_ZJU_Unigene9697	BT_Q_ZJU_Singletons25769	0.995	393.332	18.8159	4.38572	up	6.8e-05	0.000312066	--	--	--	--	--	--
BT_Q_SG_ZJU_Unigene9704	BT_Q_ZJU_Singletons139696	1	1542.32	138.338	3.47883	up	0	0	--	--	--	--	--	--
BT_Q_SG_ZJU_Unigene9719	BT_Q_ZJU_Singletons129517	1	860.143	3147.73	-1.87166	down	1.11e-06	7.27e-06	--	--	--	--	--	--
BT_Q_SG_ZJU_Unigene9737	BT_Q_ZJU_Singletons276	1	2220.11	204.238	3.44231	up	0	0	--	--	--	--	--	--
BT_Q_SG_ZJU_Unigene9745	BT_Q_ZJU_Singletons11710	1	1417.99	515.528	1.45972	up	4e-05	0.000195176	--	--	--	--	--	--
BT_Q_SG_ZJU_Unigene9749	BT_Q_ZJU_Singletons22846	1	283.598	1268.47	-2.16117	down	4.46e-05	0.000213806	--	--	--	--	--	--
BT_Q_SG_ZJU_Unigene9767	BT_Q_ZJU_Singletons12912	0.9964	510.476	2231.69	-2.12822	down	4.39e-08	3.22e-07	gi|239789824|dbj|BAH71511.1|	8e-27	ACYPI003467 [Acyrthosiphon pisum]	sp|B0BML7|SPRE_XENTR	7e-17	Sepiapterin reductase OS=Xenopus tropicalis GN=spr PE=2 SV=1
BT_Q_SG_ZJU_Unigene9773	BT_Q_ZJU_Singletons1654	0.9951	308.465	2065.85	-2.74356	down	3.1e-07	2.16e-06	gi|48095871|ref|XP_394536.1|	9e-44	PREDICTED: similar to Cyclin K CG15218-PA, isoform A [Apis mellifera]	sp|O88874|CCNK_MOUSE	7e-41	Cyclin-K OS=Mus musculus GN=Ccnk PE=1 SV=2
BT_Q_SG_ZJU_Unigene9775	BT_Q_ZJU_Singletons105966	1	4146.91	644.724	2.68528	up	0	0	--	--	--	--	--	--
BT_Q_SG_ZJU_Unigene9783	BT_Q_ZJU_Singletons15712	0.9943	4830.56	117.68	5.35925	up	0	0	--	--	--	--	--	--
BT_Q_SG_ZJU_Unigene9785	BT_Q_ZJU_Singletons1606	0.9928	2815.57	680.18	2.04944	up	0	0	--	--	--	--	--	--
BT_Q_SG_ZJU_Unigene9788	BT_Q_ZJU_Singletons158651	1	10963.9	635.324	4.10912	up	0	0	--	--	--	--	--	--
BT_Q_SG_ZJU_Unigene9802	BT_Q_ZJU_Singletons15884	0.9928	395.604	2973.86	-2.91021	down	5.79e-14	5.44e-13	gi|156550807|ref|XP_001600649.1|	2e-10	PREDICTED: similar to eukaryotic translation initiation factor 4 gamma, 2 [Nasonia vitripennis]	sp|P79398|IF4G2_RABIT	3e-06	Eukaryotic translation initiation factor 4 gamma 2 OS=Oryctolagus cuniculus GN=EIF4G2 PE=2 SV=1
BT_Q_SG_ZJU_Unigene9830	BT_Q_ZJU_Singletons778	1	2572.35	298.845	3.10562	up	0	0	--	--	--	--	--	--
BT_Q_SG_ZJU_Unigene9842	BT_Q_ZJU_Singletons139435	0.9953	12494.3	193.371	6.01376	up	0	0	--	--	--	--	--	--
BT_Q_SG_ZJU_Unigene9846	BT_Q_ZJU_Singletons152832	1	567.783	48.502	3.54922	up	2.6e-05	0.000131324	--	--	--	--	--	--
BT_Q_SG_ZJU_Unigene9862	BT_Q_ZJU_Singletons141282	1	10732.6	114.456	6.55106	up	0	0	--	--	--	--	--	--
BT_Q_SG_ZJU_Unigene9865	BT_Q_ZJU_Singletons1633	1	391.365	1758.51	-2.16777	down	8.87e-07	5.84e-06	gi|66523933|ref|XP_625154.1|	4e-32	PREDICTED: similar to Probable signal recognition particle 68 kDa protein (SRP68) [Apis mellifera]	sp|Q9VSS2|SRP68_DROME	2e-27	Signal recognition particle 68 kDa protein OS=Drosophila melanogaster GN=Srp68 PE=1 SV=1
BT_Q_SG_ZJU_Unigene9869	BT_Q_ZJU_Singletons163245	1	1789.1	247.395	2.85434	up	0	0	--	--	--	--	--	--
BT_Q_SG_ZJU_Unigene9874	BT_Q_ZJU_Singletons30273	1	1837.02	200.591	3.19504	up	0	0	--	--	--	--	--	--
BT_Q_SG_ZJU_Unigene9900	BT_Q_ZJU_Singletons22521	0.9926	3188.9	991.561	1.68528	up	0	0	--	--	--	--	--	--
BT_Q_SG_ZJU_Unigene9916	BT_Q_ZJU_Singletons22747	0.9956	347.88	4401.7	-3.6614	down	1.08e-19	1.06e-18	gi|1945521|gb|AAC37299.1|	9e-36	glycerol-3-phosphate dehydrogenase [Chymomyza procnemis]	sp|P07735|GPDA_DROVI	2e-36	Glycerol-3-phosphate dehydrogenase [NAD+], cytoplasmic OS=Drosophila virilis GN=Gpdh PE=1 SV=3
BT_Q_SG_ZJU_Unigene9917	BT_Q_ZJU_Singletons159619	0.9955	566.682	50.8284	3.47883	up	1e-05	5.43e-05	--	--	--	--	--	--
BT_Q_SG_ZJU_Unigene9929	BT_Q_ZJU_Singletons18854	1	7460.91	1171.11	2.67148	up	0	0	--	--	--	--	--	--
BT_Q_SG_ZJU_Unigene9940	BT_Q_ZJU_Singletons7482	0.9917	391.365	4430.82	-3.50099	down	1.93e-20	1.9e-19	gi|225718478|gb|ACO15085.1|	2e-22	DnaJ homolog subfamily C member 7 [Caligus clemensi]	sp|Q5R8D8|DNJC7_PONAB	2e-17	DnaJ homolog subfamily C member 7 OS=Pongo abelii GN=DNAJC7 PE=2 SV=1
BT_Q_SG_ZJU_Unigene9944	BT_Q_ZJU_Singletons4467	1	3194.82	397.36	3.00721	up	0	0	--	--	--	--	--	--
BT_Q_SG_ZJU_Unigene9945	BT_Q_ZJU_Singletons20426	0.9929	444.102	2058.07	-2.21233	down	5.75e-08	4.18e-07	--	--	--	--	--	--
BT_Q_SG_ZJU_Unigene9954	BT_Q_ZJU_Singletons36022	1	3540.26	105.848	5.0638	up	0	0	--	--	--	--	--	--
BT_Q_SG_ZJU_Unigene9990	BT_Q_ZJU_Singletons35084	0.9913	476.444	2580.35	-2.43719	down	6.89e-09	5.21e-08	--	--	--	--	--	--
BT_Q_SG_ZJU_Unigene9991	BT_Q_ZJU_Singletons25762	0.993	496.096	2959.89	-2.57685	down	8.35e-13	7.69e-12	gi|156539571|ref|XP_001601646.1|	1e-32	PREDICTED: similar to f14p3.9 protein (auxin transport protein) [Nasonia vitripennis]	sp|Q9VLT5|POE_DROME	4e-23	Protein purity of essence OS=Drosophila melanogaster GN=poe PE=1 SV=1
BT_Q_SG_ZJU_Unigene10013	BT_Q_ZJU_Singletons31911	0.9912	415.609	2915.96	-2.81067	down	4.72e-11	4.14e-10	--	--	--	--	--	--
BT_Q_SG_ZJU_Unigene10023	BT_Q_ZJU_Singletons14357	1	430.071	1789.89	-2.05722	down	0.000138664	0.000595069	gi|114051287|ref|NP_001040381.1|	3e-31	fructose-1,6-bisphosphatase [Bombyx mori] >gi|95102692|gb|ABF51284.1| fructose-1,6-bisphosphatase [Bombyx mori]	sp|Q9QXD6|F16P1_MOUSE	3e-29	Fructose-1,6-bisphosphatase 1 OS=Mus musculus GN=Fbp1 PE=2 SV=3
BT_Q_SG_ZJU_Unigene10027	BT_Q_ZJU_Singletons166342	1	467.301	2151.61	-2.20299	down	3.68e-06	2.2e-05	--	--	--	--	--	--
BT_Q_SG_ZJU_Unigene10041	BT_Q_ZJU_Singletons15869	1	4050.49	1348.49	1.58675	up	0	0	gi|91083101|ref|XP_969476.1|	7e-10	PREDICTED: similar to MGC88883 protein [Tribolium castaneum]	--	--	--
BT_Q_SG_ZJU_Unigene10053	BT_Q_ZJU_Singletons132670	1	2974.37	252.744	3.55684	up	0	0	--	--	--	--	--	--
BT_Q_SG_ZJU_Unigene10058	BT_Q_ZJU_Singletons161176	0.9922	424.737	1552.89	-1.87032	down	5.8e-05	0.000271158	--	--	--	--	--	--
BT_Q_SG_ZJU_Unigene10071	BT_Q_ZJU_Singletons13644	0.9903	831.887	2649.99	-1.67153	down	9.87e-06	5.37e-05	--	--	--	--	--	--
BT_Q_SG_ZJU_Unigene10095	BT_Q_ZJU_Singletons26145	0.9954	289.9	1976.19	-2.76909	down	2.11e-07	1.48e-06	--	--	--	--	--	--
BT_Q_SG_ZJU_Unigene10102	BT_Q_ZJU_Singletons152889	1	4525.16	1535.77	1.559	up	0	0	--	--	--	--	--	--
BT_Q_SG_ZJU_Unigene10104	BT_Q_ZJU_Singletons6066	0.9943	268.365	1626.12	-2.59917	down	5.57e-05	0.000260869	--	--	--	--	--	--
BT_Q_SG_ZJU_Unigene10128	BT_Q_ZJU_Singletons11077	0.9965	381.819	1630.82	-2.09463	down	2.76e-06	1.66e-05	gi|291238783|ref|XP_002739301.1|	1e-37	PREDICTED: RAN binding protein 9-like isoform 2 [Saccoglossus kowalevskii]	sp|P69566|RANB9_MOUSE	6e-35	Ran-binding protein 9 OS=Mus musculus GN=Ranbp9 PE=1 SV=1
BT_Q_SG_ZJU_Unigene10146	BT_Q_ZJU_Singletons16636	1	365.762	1495.99	-2.03213	down	0.000179584	0.000746835	gi|195436746|ref|XP_002066316.1|	2e-30	GK18160 [Drosophila willistoni] >gi|194162401|gb|EDW77302.1| GK18160 [Drosophila willistoni]	sp|Q9Y6H3|ATP23_HUMAN	1e-15	Mitochondrial inner membrane protease ATP23 homolog OS=Homo sapiens GN=XRCC6BP1 PE=1 SV=3
BT_Q_SG_ZJU_Unigene10149	BT_Q_ZJU_Singletons17905	0.9955	569.258	2365.75	-2.05514	down	9.35e-07	6.15e-06	--	--	--	--	--	--
BT_Q_SG_ZJU_Unigene10155	BT_Q_ZJU_Singletons13103	0.9951	1841.72	660.769	1.47883	up	4.6e-05	0.000220071	--	--	--	--	--	--
BT_Q_SG_ZJU_Unigene10169	BT_Q_ZJU_Singletons164281	1	5960.79	79.2076	6.23372	up	0	0	--	--	--	--	--	--
BT_Q_SG_ZJU_Unigene10170	BT_Q_ZJU_Singletons153223	1	2193.16	144.709	3.92178	up	0	0	--	--	--	--	--	--
BT_Q_SG_ZJU_Unigene10240	BT_Q_ZJU_Singletons4814	0.9946	2030.87	111.319	4.18933	up	0	0	--	--	--	--	--	--
BT_Q_SG_ZJU_Unigene10241	BT_Q_ZJU_Singletons123999	1	1061.33	232.7	2.18933	up	7.2e-05	0.000327537	--	--	--	--	--	--
BT_Q_SG_ZJU_Unigene10255	BT_Q_ZJU_Singletons2566	1	587.047	3869.17	-2.72048	down	9.82e-15	9.36e-14	--	--	--	--	--	--
BT_Q_SG_ZJU_Unigene10263	BT_Q_ZJU_Singletons25874	0.995	861.003	159.135	2.43576	up	4e-05	0.00019472	--	--	--	--	--	--
BT_Q_SG_ZJU_Unigene10267	BT_Q_ZJU_Singletons13487	0.9966	801.43	3878.54	-2.27487	down	5.34e-15	5.13e-14	--	--	--	--	--	--
BT_Q_SG_ZJU_Unigene10280	BT_Q_ZJU_Singletons133030	1	1793.76	273.026	2.71587	up	0	0	--	--	--	--	--	--
BT_Q_SG_ZJU_Unigene10287	BT_Q_ZJU_Singletons21342	0.9966	530.664	2297.39	-2.11412	down	9.84e-09	7.43e-08	--	--	--	--	--	--
BT_Q_SG_ZJU_Unigene10292	BT_Q_ZJU_Singletons138045	1	1967.07	313.663	2.64876	up	0	0	--	--	--	--	--	--
BT_Q_SG_ZJU_Unigene10302	BT_Q_ZJU_Singletons158645	0.9966	424.531	1466.01	-1.78795	down	4.7e-05	0.000224424	gi|193594147|ref|XP_001944404.1|	2e-41	PREDICTED: similar to AGAP009439-PA [Acyrthosiphon pisum]	sp|Q4FZT0|STML2_RAT	1e-37	Stomatin-like protein 2 OS=Rattus norvegicus GN=Stoml2 PE=1 SV=1
BT_Q_SG_ZJU_Unigene10322	BT_Q_ZJU_Singletons11421	1	634.646	82.2241	2.94832	up	2e-06	1.27e-05	--	--	--	--	--	--
BT_Q_SG_ZJU_Unigene10323	BT_Q_ZJU_Singletons158376	1	431.851	1362.17	-1.6573	down	0.00022965	0.000930887	--	--	--	--	--	--
BT_Q_SG_ZJU_Unigene10334	BT_Q_ZJU_Singletons109762	1	1204.2	120.011	3.32683	up	0	0	--	--	--	--	--	--
BT_Q_SG_ZJU_Unigene10350	BT_Q_ZJU_Singletons33665	1	1423.15	598.845	1.24883	up	0.000172	0.00071816	--	--	--	--	--	--
BT_Q_SG_ZJU_Unigene10355	BT_Q_ZJU_Singletons155169	1	2879.01	75.3175	5.25644	up	0	0	--	--	--	--	--	--
BT_Q_SG_ZJU_Unigene10361	BT_Q_ZJU_Singletons124428	1	4083.81	1109.06	1.88057	up	0	0	--	--	--	--	--	--
BT_Q_SG_ZJU_Unigene10362	BT_Q_ZJU_Singletons17690	0.9933	474.382	2319.74	-2.28984	down	1.4e-09	1.11e-08	--	--	--	--	--	--
BT_Q_SG_ZJU_Unigene10372	BT_Q_ZJU_Singletons139865	1	1048.3	259.096	2.01649	up	3.4e-05	0.000167468	--	--	--	--	--	--
BT_Q_SG_ZJU_Unigene10393	BT_Q_ZJU_Singletons16244	1	490.911	2080.92	-2.08369	down	1.04e-07	7.44e-07	--	--	--	--	--	--
BT_Q_SG_ZJU_Unigene10397	BT_Q_ZJU_Singletons123756	0.9943	719.752	86.0772	3.0638	up	4e-05	0.000194947	--	--	--	--	--	--
BT_Q_SG_ZJU_Unigene10401	BT_Q_ZJU_Singletons981	0.9966	370.21	2264.32	-2.61266	down	1.52e-10	1.29e-09	--	--	--	--	--	--
BT_Q_SG_ZJU_Unigene10405	BT_Q_ZJU_Singletons9865	0.9951	610.911	2054.83	-1.74998	down	7.61e-05	0.000342847	--	--	--	--	--	--
BT_Q_SG_ZJU_Unigene10412	BT_Q_ZJU_Singletons152298	1	1505.25	315.03	2.25644	up	0	0	--	--	--	--	--	--
BT_Q_SG_ZJU_Unigene10424	BT_Q_ZJU_Singletons166350	1	1002.79	73.2881	3.77429	up	0	0	--	--	--	--	--	--
BT_Q_SG_ZJU_Unigene10446	BT_Q_ZJU_Singletons141397	1	8318.55	2561.52	1.69933	up	0	0	--	--	--	--	--	--
BT_Q_SG_ZJU_Unigene10458	BT_Q_ZJU_Singletons139572	1	544.508	2328.01	-2.09608	down	4.69e-07	3.18e-06	--	--	--	--	--	--
BT_Q_SG_ZJU_Unigene10466	BT_Q_ZJU_Singletons1448	0.9962	59.2977	1581.42	-4.7371	down	5.11e-10	4.21e-09	--	--	--	--	--	--
BT_Q_SG_ZJU_Unigene10483	BT_Q_ZJU_Singletons119469	0.9943	719.752	75.3175	3.25644	up	2e-05	0.0001034	--	--	--	--	--	--
BT_Q_SG_ZJU_Unigene10487	BT_Q_ZJU_Singletons28201	0.9967	5028.13	223.174	4.49378	up	0	0	gi|194765178|ref|XP_001964704.1|	2e-08	GF23330 [Drosophila ananassae] >gi|190614976|gb|EDV30500.1| GF23330 [Drosophila ananassae]	sp|P54001|P4HA1_RAT	5e-09	Prolyl 4-hydroxylase subunit alpha-1 OS=Rattus norvegicus GN=P4ha1 PE=2 SV=2
BT_Q_SG_ZJU_Unigene10499	BT_Q_ZJU_Singletons23526	0.9901	413.323	1655.92	-2.00229	down	2.19e-06	1.34e-05	--	--	--	--	--	--
BT_Q_SG_ZJU_Unigene10520	BT_Q_ZJU_Singletons2466	0.9917	587.047	2231.01	-1.92615	down	1.71e-06	1.09e-05	--	--	--	--	--	--
BT_Q_SG_ZJU_Unigene10525	BT_Q_ZJU_Singletons165259	1	1408.91	411.879	1.77429	up	0	0	gi|170028478|ref|XP_001842122.1|	6e-22	osm-1 [Culex quinquefasciatus] >gi|167876244|gb|EDS39627.1| osm-1 [Culex quinquefasciatus]	sp|Q5RHH4|IF172_DANRE	9e-22	Intraflagellar transport protein 172 homolog OS=Danio rerio GN=ift172 PE=2 SV=1
BT_Q_SG_ZJU_Unigene10534	BT_Q_ZJU_Singletons155245	1	1277.93	292.926	2.1252	up	0	0	--	--	--	--	--	--
BT_Q_SG_ZJU_Unigene10547	BT_Q_ZJU_Singletons135781	1	3895.61	284.709	3.77429	up	0	0	--	--	--	--	--	--
BT_Q_SG_ZJU_Unigene10560	BT_Q_ZJU_Singletons2067	0.9902	613.906	1725.34	-1.49079	down	6.3e-05	0.000291382	--	--	--	--	--	--
BT_Q_SG_ZJU_Unigene10572	BT_Q_ZJU_Singletons13680	0.9935	356.945	1286.74	-1.84995	down	7.43e-05	0.000335089	gi|241729581|ref|XP_002404605.1|	3e-22	secreted protein [Ixodes scapularis] >gi|215505493|gb|EEC14987.1| secreted protein [Ixodes scapularis]	sp|Q32LM2|SGTA_BOVIN	2e-20	Small glutamine-rich tetratricopeptide repeat-containing protein alpha OS=Bos taurus GN=SGTA PE=2 SV=1
BT_Q_SG_ZJU_Unigene10575	BT_Q_ZJU_Singletons8278	0.9956	2815.08	197.071	3.83639	up	0	0	--	--	--	--	--	--
BT_Q_SG_ZJU_Unigene10580	BT_Q_ZJU_Singletons132379	1	960.405	45.943	4.38572	up	0	0	--	--	--	--	--	--
BT_Q_SG_ZJU_Unigene10584	BT_Q_ZJU_Singletons164733	0.9965	1587.35	399.311	1.99104	up	0	0	--	--	--	--	--	--
BT_Q_SG_ZJU_Unigene10596	BT_Q_ZJU_Singletons31960	0.9963	527.683	1682.86	-1.67317	down	7.03e-05	0.000319983	gi|262302505|gb|ACY43845.1|	5e-43	proteasome non-ATPase regulatory subunit [Ctenolepisma lineata]	sp|Q9V3P6|PSMD1_DROME	4e-41	26S proteasome non-ATPase regulatory subunit 1 OS=Drosophila melanogaster GN=Rpn2 PE=1 SV=1
BT_Q_SG_ZJU_Unigene10616	BT_Q_ZJU_Singletons16157	0.9935	508.266	1878.26	-1.88574	down	8.7e-07	5.73e-06	--	--	--	--	--	--
BT_Q_SG_ZJU_Unigene10618	BT_Q_ZJU_Singletons35871	0.9931	917.683	180.762	2.3439	up	0	0	--	--	--	--	--	--
BT_Q_SG_ZJU_Unigene10621	BT_Q_ZJU_Singletons9020	0.9931	5164.4	1074.41	2.26505	up	0	0	--	--	--	--	--	--
BT_Q_SG_ZJU_Unigene10628	BT_Q_ZJU_Singletons125159	1	1683.29	261.702	2.68528	up	0	0	--	--	--	--	--	--
BT_Q_SG_ZJU_Unigene10640	BT_Q_ZJU_Singletons155606	1	4808.93	104.01	5.53092	up	0	0	--	--	--	--	--	--
BT_Q_SG_ZJU_Unigene10641	BT_Q_ZJU_Singletons159882	1	1644.65	211.258	2.9607	up	0	0	--	--	--	--	--	--
BT_Q_SG_ZJU_Unigene10643	BT_Q_ZJU_Singletons154662	0.9963	7652.06	146.701	5.7049	up	0	0	gi|74002211|ref|XP_544971.2|	2e-06	PREDICTED: similar to dentin sialophosphoprotein preproprotein [Canis familiaris]	sp|P97399|DSPP_MOUSE	6e-06	Dentin sialophosphoprotein OS=Mus musculus GN=Dspp PE=1 SV=2
BT_Q_SG_ZJU_Unigene10650	BT_Q_ZJU_Singletons13063	0.9951	759.932	3771.62	-2.31124	down	9.14e-11	7.87e-10	gi|225718056|gb|ACO14874.1|	5e-47	Enhancer of rudimentary homolog [Caligus clemensi]	sp|Q93104|ERH_AEDAE	2e-45	Enhancer of rudimentary homolog OS=Aedes aegypti PE=3 SV=1
BT_Q_SG_ZJU_Unigene10662	BT_Q_ZJU_Singletons3591	0.9911	489.206	3501.98	-2.83966	down	4.45e-13	4.13e-12	--	--	--	--	--	--
BT_Q_SG_ZJU_Unigene10674	BT_Q_ZJU_Singletons137489	0.9952	823.926	107.494	2.93827	up	4e-06	2.37e-05	--	--	--	--	--	--
BT_Q_SG_ZJU_Unigene10676	BT_Q_ZJU_Singletons4141	0.9968	706.982	1848.02	-1.38624	down	7.3e-05	0.00033112	gi|189239479|ref|XP_975440.2|	3e-45	PREDICTED: similar to polyadenylate binding protein 2 [Tribolium castaneum]	sp|Q8CCS6|PABP2_MOUSE	7e-43	Polyadenylate-binding protein 2 OS=Mus musculus GN=Pabpn1 PE=2 SV=3
BT_Q_SG_ZJU_Unigene10686	BT_Q_ZJU_Singletons166126	0.9966	428.893	1481.07	-1.78795	down	4.7e-05	0.000224167	--	--	--	--	--	--
BT_Q_SG_ZJU_Unigene10693	BT_Q_ZJU_Singletons20229	0.9967	360.468	2044.62	-2.50389	down	1.72e-09	1.35e-08	--	--	--	--	--	--
BT_Q_SG_ZJU_Unigene10697	BT_Q_ZJU_Singletons17631	0.9948	573.729	3371.88	-2.55511	down	5.64e-10	4.62e-09	--	--	--	--	--	--
BT_Q_SG_ZJU_Unigene10715	BT_Q_ZJU_Singletons166748	1	334.262	2045.41	-2.61334	down	3.47e-09	2.67e-08	gi|193699965|ref|XP_001951614.1|	1e-45	PREDICTED: similar to lysyl-tRNA synthetase [Acyrthosiphon pisum]	sp|P37879|SYK_CRIGR	1e-33	Lysyl-tRNA synthetase OS=Cricetulus griseus GN=KARS PE=1 SV=1
BT_Q_SG_ZJU_Unigene10721	BT_Q_ZJU_Singletons21256	0.9909	857.786	2564.63	-1.58006	down	1.65e-05	8.7e-05	--	--	--	--	--	--
BT_Q_SG_ZJU_Unigene10730	BT_Q_ZJU_Singletons25172	1	1901.96	192.467	3.3048	up	0	0	--	--	--	--	--	--
BT_Q_SG_ZJU_Unigene10734	BT_Q_ZJU_Singletons4734	0.992	311.845	2185.45	-2.80903	down	2.34e-09	1.82e-08	--	--	--	--	--	--
BT_Q_SG_ZJU_Unigene10741	BT_Q_ZJU_Singletons4495	0.9929	2061.28	4150.77	-1.00984	down	6.26e-06	3.53e-05	gi|170055785|ref|XP_001863736.1|	8e-21	Lsm5 protein [Culex quinquefasciatus] >gi|167875611|gb|EDS38994.1| Lsm5 protein [Culex quinquefasciatus]	sp|Q5R628|LSM5_PONAB	1e-19	U6 snRNA-associated Sm-like protein LSm5 OS=Pongo abelii GN=LSM5 PE=3 SV=3
BT_Q_SG_ZJU_Unigene10756	BT_Q_ZJU_Singletons143768	1	4008.18	135.665	4.88483	up	0	0	--	--	--	--	--	--
BT_Q_SG_ZJU_Unigene10764	BT_Q_ZJU_Singletons14048	0.9966	1167.46	3668.2	-1.6517	down	4e-10	3.31e-09	--	--	--	--	--	--
BT_Q_SG_ZJU_Unigene10808	BT_Q_ZJU_Singletons6639	1	375.281	1359.25	-1.85677	down	6.84e-05	0.000313401	gi|195047482|ref|XP_001992350.1|	5e-08	GH24703 [Drosophila grimshawi] >gi|193893191|gb|EDV92057.1| GH24703 [Drosophila grimshawi]	sp|Q7ZW33|UTP15_DANRE	2e-06	U3 small nucleolar RNA-associated protein 15 homolog OS=Danio rerio GN=utp15 PE=2 SV=1
BT_Q_SG_ZJU_Unigene10834	BT_Q_ZJU_Singletons28037	0.9937	836.881	2502.13	-1.58006	down	2.3e-07	1.61e-06	gi|237858753|ref|NP_001153816.1|	2e-13	mitochondrial ribosomal protein L48 [Acyrthosiphon pisum]	--	--	--
BT_Q_SG_ZJU_Unigene10840	BT_Q_ZJU_Singletons9917	1	546.091	1632.71	-1.58006	down	0.000222926	0.000906276	gi|156541837|ref|XP_001601244.1|	5e-10	PREDICTED: similar to CG8067-PA [Nasonia vitripennis]	--	--	--
BT_Q_SG_ZJU_Unigene10851	BT_Q_ZJU_Singletons122946	0.9945	259.468	2037.68	-2.97329	down	7.14e-07	4.75e-06	--	--	--	--	--	--
BT_Q_SG_ZJU_Unigene10854	BT_Q_ZJU_Singletons1498	0.9966	318.399	1624.67	-2.35124	down	3.91e-07	2.68e-06	--	--	--	--	--	--
BT_Q_SG_ZJU_Unigene10857	BT_Q_ZJU_Singletons28059	1	375.281	1455.43	-1.9554	down	1.96e-05	0.000101825	gi|198425916|ref|XP_002122170.1|	1e-15	PREDICTED: similar to Stomatin-like protein 2 (SLP-2) (EPB72-like 2) [Ciona intestinalis]	sp|Q4FZT0|STML2_RAT	5e-13	Stomatin-like protein 2 OS=Rattus norvegicus GN=Stoml2 PE=1 SV=1
BT_Q_SG_ZJU_Unigene10860	BT_Q_ZJU_Singletons150718	1	360.705	1552.96	-2.10613	down	8.24e-05	0.000367461	gi|193704809|ref|XP_001949474.1|	3e-17	PREDICTED: similar to ATPase n2b [Acyrthosiphon pisum]	sp|Q3V384|LACE1_MOUSE	3e-13	Lactation elevated protein 1 OS=Mus musculus GN=Lace1 PE=2 SV=1
BT_Q_SG_ZJU_Unigene10870	BT_Q_ZJU_Singletons3116	0.9969	4549.62	1474.34	1.62568	up	0	0	--	--	--	--	--	--
BT_Q_SG_ZJU_Unigene10874	BT_Q_ZJU_Singletons151184	0.9943	1341.82	96.2835	3.80076	up	0	0	--	--	--	--	--	--
BT_Q_SG_ZJU_Unigene10876	BT_Q_ZJU_Singletons164008	0.9906	782.73	193.068	2.0194	up	1.8e-05	9.41e-05	--	--	--	--	--	--
BT_Q_SG_ZJU_Unigene10887	BT_Q_ZJU_Singletons16163	0.9948	730.007	2590.01	-1.82697	down	8.17e-06	4.53e-05	--	--	--	--	--	--
BT_Q_SG_ZJU_Unigene10891	BT_Q_ZJU_Singletons32231	0.996	565.829	2842.1	-2.32852	down	5.72e-10	4.67e-09	--	--	--	--	--	--
BT_Q_SG_ZJU_Unigene10895	BT_Q_ZJU_Singletons135502	1	3768.7	208.02	4.17927	up	0	0	--	--	--	--	--	--
BT_Q_SG_ZJU_Unigene10896	BT_Q_ZJU_Singletons27417	1	765.714	142.448	2.42637	up	0.000184	0.000762913	--	--	--	--	--	--
BT_Q_SG_ZJU_Unigene10900	BT_Q_ZJU_Singletons109658	1	1103.85	204.019	2.43576	up	4e-05	0.000194492	--	--	--	--	--	--
BT_Q_SG_ZJU_Unigene10938	BT_Q_ZJU_Singletons11445	1	1401.18	473.823	1.56423	up	4e-06	2.36e-05	--	--	--	--	--	--
BT_Q_SG_ZJU_Unigene10940	BT_Q_ZJU_Singletons18561	1	2066.61	383.086	2.43153	up	0	0	--	--	--	--	--	--
BT_Q_SG_ZJU_Unigene10941	BT_Q_ZJU_Singletons164867	1	2791.9	781.068	1.83773	up	0	0	--	--	--	--	--	--
BT_Q_SG_ZJU_Unigene10953	BT_Q_ZJU_Singletons13781	1	623.413	3818.91	-2.6149	down	2.71e-13	2.52e-12	--	--	--	--	--	--
BT_Q_SG_ZJU_Unigene10956	BT_Q_ZJU_Singletons22727	1	722.52	144.014	2.32683	up	4e-06	2.33e-05	--	--	--	--	--	--
BT_Q_SG_ZJU_Unigene10958	BT_Q_ZJU_Singletons117821	1	3315.09	297.346	3.47883	up	0	0	--	--	--	--	--	--
BT_Q_SG_ZJU_Unigene10959	BT_Q_ZJU_Singletons18799	1	674.352	2160.21	-1.6796	down	4.4e-07	2.99e-06	gi|194910018|ref|XP_001982058.1|	5e-30	GG12381 [Drosophila erecta] >gi|190656696|gb|EDV53928.1| GG12381 [Drosophila erecta]	sp|Q8IMX7|MIRO_DROME	3e-30	Mitochondrial Rho GTPase OS=Drosophila melanogaster GN=Miro PE=1 SV=1
BT_Q_SG_ZJU_Unigene10975	BT_Q_ZJU_Singletons143981	1	1162.91	139.076	3.0638	up	0	0	--	--	--	--	--	--
BT_Q_SG_ZJU_Unigene10976	BT_Q_ZJU_Singletons138167	0.9951	687.275	100.458	2.77429	up	4.4e-05	0.000212208	--	--	--	--	--	--
BT_Q_SG_ZJU_Unigene10982	BT_Q_ZJU_Singletons21698	0.9967	516.653	3410.7	-2.7228	down	2.74e-16	2.65e-15	--	--	--	--	--	--
BT_Q_SG_ZJU_Unigene10994	BT_Q_ZJU_Singletons19018	1	669.44	1749.01	-1.38551	down	0.000138964	0.000594519	--	--	--	--	--	--
BT_Q_SG_ZJU_Unigene10995	BT_Q_ZJU_Singletons140018	1	335.936	1430.25	-2.09001	down	9.8e-05	0.000431828	gi|189239223|ref|XP_973572.2|	2e-16	PREDICTED: similar to DAZAP2-like protein [Tribolium castaneum]	--	--	--
BT_Q_SG_ZJU_Unigene10996	BT_Q_ZJU_Singletons141518	1	2068.89	74.2274	4.80076	up	0	0	gi|195117948|ref|XP_002003507.1|	1e-09	GI17953 [Drosophila mojavensis] >gi|193914082|gb|EDW12949.1| GI17953 [Drosophila mojavensis]	sp|P18424|LCAT_RAT	3e-08	Phosphatidylcholine-sterol acyltransferase OS=Rattus norvegicus GN=Lcat PE=2 SV=1
BT_Q_SG_ZJU_Unigene10997	BT_Q_ZJU_Singletons23498	0.9914	2226.73	395.417	2.49348	up	0	0	--	--	--	--	--	--
BT_Q_SG_ZJU_Unigene11010	BT_Q_ZJU_Singletons11791	0.9964	1907.73	107.365	4.15126	up	0	0	--	--	--	--	--	--
BT_Q_SG_ZJU_Unigene11022	BT_Q_ZJU_Singletons23174	0.9967	520.086	2382.21	-2.19548	down	1.57e-09	1.24e-08	--	--	--	--	--	--
BT_Q_SG_ZJU_Unigene11024	BT_Q_ZJU_Singletons3956	1	2348.19	691.266	1.76424	up	0	0	--	--	--	--	--	--
BT_Q_SG_ZJU_Unigene11039	BT_Q_ZJU_Singletons154177	0.9967	3484.58	422.951	3.04242	up	0	0	--	--	--	--	--	--
BT_Q_SG_ZJU_Unigene11041	BT_Q_ZJU_Singletons18511	1	1508.25	454.05	1.73195	up	0	0	gi|193606015|ref|XP_001942911.1|	5e-42	PREDICTED: similar to Choline/ethanolamine kinase [Acyrthosiphon pisum]	sp|Q9Y259|CHKB_HUMAN	3e-22	Choline/ethanolamine kinase OS=Homo sapiens GN=CHKB PE=1 SV=3
BT_Q_SG_ZJU_Unigene11042	BT_Q_ZJU_Singletons111119	0.9937	98.4566	1271.67	-3.69109	down	0.000113588	0.000494587	gi|110755138|ref|XP_001121632.1|	1e-24	PREDICTED: similar to thoc6 CG5632-PA [Apis mellifera]	sp|Q9VTV1|THOC6_DROME	2e-08	THO complex subunit 6 OS=Drosophila melanogaster GN=thoc6 PE=1 SV=1
BT_Q_SG_ZJU_Unigene11064	BT_Q_ZJU_Singletons27232	1	521.82	2439.51	-2.22497	down	1.04e-10	8.9e-10	gi|193673888|ref|XP_001944586.1|	1e-09	PREDICTED: similar to mitogen-activated protein kinase kinase kinase [Acyrthosiphon pisum]	--	--	--
BT_Q_SG_ZJU_Unigene11073	BT_Q_ZJU_Singletons26946	0.9962	479.834	1872.18	-1.96411	down	3.96e-06	2.36e-05	--	--	--	--	--	--
BT_Q_SG_ZJU_Unigene11074	BT_Q_ZJU_Singletons155713	0.9903	607.946	1993.36	-1.71319	down	1.77e-06	1.13e-05	gi|225711246|gb|ACO11469.1|	2e-40	Ribosome production factor 1 [Caligus rogercresseyi]	sp|Q9VKB4|RPF1_DROME	4e-37	Probable ribosome production factor 1 OS=Drosophila melanogaster GN=CG6712 PE=2 SV=1
BT_Q_SG_ZJU_Unigene11088	BT_Q_ZJU_Singletons147375	1	1190.46	398.639	1.57837	up	8.2e-05	0.000366232	--	--	--	--	--	--
BT_Q_SG_ZJU_Unigene11100	BT_Q_ZJU_Singletons26184	0.994	658.151	2029.6	-1.6247	down	1.29e-06	8.36e-06	--	--	--	--	--	--
BT_Q_SG_ZJU_Unigene11106	BT_Q_ZJU_Singletons28129	1	2007	288.028	2.80076	up	0	0	gi|170036903|ref|XP_001846300.1|	2e-06	conserved hypothetical protein [Culex quinquefasciatus] >gi|167879928|gb|EDS43311.1| conserved hypothetical protein [Culex quinquefasciatus]	--	--	--
BT_Q_SG_ZJU_Unigene11108	BT_Q_ZJU_Singletons5204	1	300.088	2560.04	-3.09271	down	2.74e-14	2.59e-13	gi|189234161|ref|XP_967052.2|	2e-42	PREDICTED: similar to jumonji domain containing 1A [Tribolium castaneum]	sp|Q5ZIX8|KDM3A_CHICK	2e-23	Lysine-specific demethylase 3A OS=Gallus gallus GN=KDM3A PE=2 SV=1
BT_Q_SG_ZJU_Unigene11127	BT_Q_ZJU_Singletons161431	1	5422.26	188.264	4.84807	up	0	0	--	--	--	--	--	--
BT_Q_SG_ZJU_Unigene11134	BT_Q_ZJU_Singletons153366	1	1809.78	119.04	3.92629	up	0	0	--	--	--	--	--	--
BT_Q_SG_ZJU_Unigene11146	BT_Q_ZJU_Singletons121775	1	915.474	76.6389	3.57837	up	0	0	--	--	--	--	--	--
BT_Q_SG_ZJU_Unigene11150	BT_Q_ZJU_Singletons7836	1	9887.11	2516.45	1.97416	up	0	0	--	--	--	--	--	--
BT_Q_SG_ZJU_Unigene11169	BT_Q_ZJU_Singletons149358	1	887.305	212.231	2.0638	up	4.4e-05	0.000212454	gi|195387211|ref|XP_002052292.1|	2e-34	maltase 2 [Drosophila virilis] >gi|194148749|gb|EDW64447.1| maltase 2 [Drosophila virilis]	sp|P29094|O16G_BACTR	1e-36	Oligo-1,6-glucosidase OS=Bacillus thermoglucosidasius GN=malL PE=1 SV=1
BT_Q_SG_ZJU_Unigene11171	BT_Q_ZJU_Singletons106822	1	207.346	1636.61	-2.9806	down	6.98e-05	0.000318867	--	--	--	--	--	--
BT_Q_SG_ZJU_Unigene11181	BT_Q_ZJU_Singletons31976	1	8383.08	415.424	4.33482	up	0	0	--	--	--	--	--	--
BT_Q_SG_ZJU_Unigene11185	BT_Q_ZJU_Singletons156128	0.9967	471.209	68.8761	2.77429	up	4.4e-05	0.000211718	--	--	--	--	--	--
BT_Q_SG_ZJU_Unigene11194	BT_Q_ZJU_Singletons5877	0.9952	449.414	1755.73	-1.96595	down	7.64e-05	0.000343575	--	--	--	--	--	--
BT_Q_SG_ZJU_Unigene11206	BT_Q_ZJU_Singletons150532	0.9955	566.682	2007.72	-1.82495	down	2.89e-05	0.000144114	--	--	--	--	--	--
BT_Q_SG_ZJU_Unigene11210	BT_Q_ZJU_Singletons106158	1	1461.1	37.4436	5.28619	up	0	0	--	--	--	--	--	--
BT_Q_SG_ZJU_Unigene11232	BT_Q_ZJU_Singletons33901	1	1887.76	941.596	1.0035	up	0.00014	0.000597725	--	--	--	--	--	--
BT_Q_SG_ZJU_Unigene11255	BT_Q_ZJU_Singletons155789	1	823.926	161.88	2.34759	up	8e-06	4.45e-05	--	--	--	--	--	--
BT_Q_SG_ZJU_Unigene11271	BT_Q_ZJU_Singletons148943	1	3354.56	347.69	3.27025	up	0	0	--	--	--	--	--	--
BT_Q_SG_ZJU_Unigene11274	BT_Q_ZJU_Singletons134533	1	2024.97	642.688	1.65571	up	4e-06	2.33e-05	--	--	--	--	--	--
BT_Q_SG_ZJU_Unigene11294	BT_Q_ZJU_Singletons30169	0.9942	766.94	2465.66	-1.68479	down	2e-08	1.48e-07	gi|118778290|ref|XP_308558.3|	2e-35	AGAP007242-PA [Anopheles gambiae str. PEST] >gi|116132312|gb|EAA04203.3| AGAP007242-PA [Anopheles gambiae str. PEST]	sp|Q6DJE4|CPSF5_XENLA	1e-31	Cleavage and polyadenylation specificity factor subunit 5 OS=Xenopus laevis GN=cpsf5 PE=2 SV=1
BT_Q_SG_ZJU_Unigene11310	BT_Q_ZJU_Singletons18462	0.9969	480.202	1740.09	-1.85745	down	1.42e-06	9.18e-06	--	--	--	--	--	--
BT_Q_SG_ZJU_Unigene11330	BT_Q_ZJU_Singletons110052	1	1894.51	155.021	3.61128	up	0	0	--	--	--	--	--	--
BT_Q_SG_ZJU_Unigene11349	BT_Q_ZJU_Singletons162459	1	1614.8	396.966	2.02427	up	0	0	--	--	--	--	--	--
BT_Q_SG_ZJU_Unigene11354	BT_Q_ZJU_Singletons398	0.9939	333.077	1473.84	-2.14566	down	1.26e-06	8.17e-06	--	--	--	--	--	--
BT_Q_SG_ZJU_Unigene11355	BT_Q_ZJU_Singletons36251	1	3130.92	391.717	2.9987	up	0	0	--	--	--	--	--	--
BT_Q_SG_ZJU_Unigene11361	BT_Q_ZJU_Singletons21737	0.9965	490.911	2615.83	-2.41374	down	7.09e-11	6.13e-10	--	--	--	--	--	--
BT_Q_SG_ZJU_Unigene11382	BT_Q_ZJU_Singletons164526	1	441.666	1514.18	-1.77751	down	1.69e-05	8.87e-05	gi|170037285|ref|XP_001846489.1|	3e-28	FAD oxidoreductase [Culex quinquefasciatus] >gi|167880398|gb|EDS43781.1| FAD oxidoreductase [Culex quinquefasciatus]	sp|Q5EA45|FXRD1_BOVIN	1e-14	FAD-dependent oxidoreductase domain-containing protein 1 OS=Bos taurus GN=FOXRED1 PE=2 SV=1
BT_Q_SG_ZJU_Unigene11394	BT_Q_ZJU_Singletons33754	0.9967	782.73	137.293	2.51126	up	2e-06	1.26e-05	--	--	--	--	--	--
BT_Q_SG_ZJU_Unigene11401	BT_Q_ZJU_Singletons162107	1	7649.41	441.451	4.11502	up	0	0	--	--	--	--	--	--
BT_Q_SG_ZJU_Unigene11404	BT_Q_ZJU_Singletons21511	1	1793.76	312.03	2.52323	up	0	0	--	--	--	--	--	--
BT_Q_SG_ZJU_Unigene11421	BT_Q_ZJU_Singletons162053	1	1938.19	160.472	3.59431	up	0	0	--	--	--	--	--	--
BT_Q_SG_ZJU_Unigene11423	BT_Q_ZJU_Singletons10790	1	361.657	2391.2	-2.72504	down	9.68e-12	8.8e-11	--	--	--	--	--	--
BT_Q_SG_ZJU_Unigene11426	BT_Q_ZJU_Singletons17042	1	368.343	2147.5	-2.54353	down	4.87e-06	2.81e-05	--	--	--	--	--	--
BT_Q_SG_ZJU_Unigene11435	BT_Q_ZJU_Singletons7315	1	331.314	2129.73	-2.6844	down	7.34e-07	4.88e-06	gi|193713701|ref|XP_001952173.1|	2e-28	PREDICTED: similar to CG14224 CG14224-PA [Acyrthosiphon pisum]	sp|Q8R317|UBQL1_MOUSE	2e-23	Ubiquilin-1 OS=Mus musculus GN=Ubqln1 PE=1 SV=1
BT_Q_SG_ZJU_Unigene11438	BT_Q_ZJU_Singletons138192	0.9956	484.877	1640.23	-1.75821	down	0.00021355	0.00087156	--	--	--	--	--	--
BT_Q_SG_ZJU_Unigene11454	BT_Q_ZJU_Singletons159926	0.9954	937.833	2467.48	-1.39564	down	0.000120701	0.000523373	--	--	--	--	--	--
BT_Q_SG_ZJU_Unigene11455	BT_Q_ZJU_Singletons155695	1	2809.8	172.817	4.02315	up	0	0	--	--	--	--	--	--
BT_Q_SG_ZJU_Unigene11461	BT_Q_ZJU_Singletons20829	0.993	547.364	1682.34	-1.6199	down	5.47e-05	0.000256496	--	--	--	--	--	--
BT_Q_SG_ZJU_Unigene11462	BT_Q_ZJU_Singletons121387	1	175.894	1798.55	-3.35406	down	1.38e-06	8.92e-06	--	--	--	--	--	--
BT_Q_SG_ZJU_Unigene11474	BT_Q_ZJU_Singletons10024	0.9917	2217.73	5702.34	-1.36247	down	6.95e-10	5.6e-09	--	--	--	--	--	--
BT_Q_SG_ZJU_Unigene11480	BT_Q_ZJU_Singletons163639	0.9944	784.91	166.879	2.23372	up	2e-06	1.23e-05	gi|66506782|ref|XP_392819.2|	5e-29	PREDICTED: similar to Mothers against decapentaplegic homolog 5 (SMAD 5) (Mothers against DPP homolog 5) (Smad5) (Somitabun protein) isoform 1 [Apis mellifera]	sp|P42003|MAD_DROME	9e-25	Protein mothers against dpp OS=Drosophila melanogaster GN=Mad PE=1 SV=1
BT_Q_SG_ZJU_Unigene11482	BT_Q_ZJU_Singletons118691	1	2778.92	265.872	3.38572	up	0	0	gi|193634202|ref|XP_001951664.1|	9e-07	PREDICTED: similar to LD43688p [Acyrthosiphon pisum]	--	--	--
BT_Q_SG_ZJU_Unigene11484	BT_Q_ZJU_Singletons161580	1	2059.82	147.804	3.80076	up	0	0	--	--	--	--	--	--
BT_Q_SG_ZJU_Unigene11502	BT_Q_ZJU_Singletons26689	0.9971	1015.93	364.495	1.47883	up	9.2e-05	0.000406106	--	--	--	--	--	--
BT_Q_SG_ZJU_Unigene11524	BT_Q_ZJU_Singletons155302	0.992	563.565	3302.52	-2.55091	down	1.76e-12	1.61e-11	gi|170055071|ref|XP_001863417.1|	4e-59	26S protease regulatory subunit 7 [Culex quinquefasciatus] >gi|167875161|gb|EDS38544.1| 26S protease regulatory subunit 7 [Culex quinquefasciatus]	sp|P46472|PRS7_XENLA	1e-58	26S protease regulatory subunit 7 OS=Xenopus laevis GN=psmc2 PE=2 SV=1
BT_Q_SG_ZJU_Unigene11525	BT_Q_ZJU_Singletons30094	0.9928	732.049	154.892	2.24067	up	2.8e-05	0.000140573	--	--	--	--	--	--
BT_Q_SG_ZJU_Unigene11544	BT_Q_ZJU_Singletons116934	1	3705.23	66.4679	5.80076	up	0	0	--	--	--	--	--	--
BT_Q_SG_ZJU_Unigene11547	BT_Q_ZJU_Singletons124632	1	338.478	3248.48	-3.26263	down	2.13e-11	1.9e-10	gi|110756904|ref|XP_395309.3|	8e-51	PREDICTED: similar to nop5 CG10206-PA [Apis mellifera]	sp|Q9QZ86|NOP58_RAT	2e-41	Nucleolar protein 58 OS=Rattus norvegicus GN=Nop58 PE=1 SV=1
BT_Q_SG_ZJU_Unigene11549	BT_Q_ZJU_Singletons158724	1	391.365	1505.54	-1.9437	down	9.83e-05	0.000432676	--	--	--	--	--	--
BT_Q_SG_ZJU_Unigene11554	BT_Q_ZJU_Singletons145942	0.9962	3178.9	1068.79	1.57255	up	0	0	--	--	--	--	--	--
BT_Q_SG_ZJU_Unigene11571	BT_Q_ZJU_Singletons791	1	8707.29	2171.28	2.00368	up	0	0	--	--	--	--	--	--
BT_Q_SG_ZJU_Unigene11583	BT_Q_ZJU_Singletons140617	1	638.963	2378.43	-1.89621	down	1.08e-05	5.82e-05	--	--	--	--	--	--
BT_Q_SG_ZJU_Unigene11585	BT_Q_ZJU_Singletons4631	0.9938	585.219	3551.89	-2.60154	down	3.92e-17	3.83e-16	--	--	--	--	--	--
BT_Q_SG_ZJU_Unigene11594	BT_Q_ZJU_Singletons3051	1	176.888	1427.93	-3.01302	down	5.18e-05	0.00024515	--	--	--	--	--	--
BT_Q_SG_ZJU_Unigene11598	BT_Q_ZJU_Singletons8064	1	903.15	1949.33	-1.10994	down	0.000174037	0.000725213	gi|194864060|ref|XP_001970750.1|	2e-22	GG23212 [Drosophila erecta] >gi|190662617|gb|EDV59809.1| GG23212 [Drosophila erecta]	sp|Q3U595|CV039_MOUSE	4e-06	UPF0545 protein C22orf39 homolog OS=Mus musculus PE=2 SV=1
BT_Q_SG_ZJU_Unigene11599	BT_Q_ZJU_Singletons4212	0.9973	3036.82	598.483	2.34318	up	0	0	--	--	--	--	--	--
BT_Q_SG_ZJU_Unigene11606	BT_Q_ZJU_Singletons149990	1	1341.82	74.8872	4.16333	up	0	0	--	--	--	--	--	--
BT_Q_SG_ZJU_Unigene11608	BT_Q_ZJU_Singletons119340	1	5338.85	346.299	3.94644	up	0	0	--	--	--	--	--	--
BT_Q_SG_ZJU_Unigene11611	BT_Q_ZJU_Singletons149218	1	2712.43	64.8775	5.38572	up	0	0	gi|194765182|ref|XP_001964706.1|	8e-08	GF22908 [Drosophila ananassae] >gi|190614978|gb|EDV30502.1| GF22908 [Drosophila ananassae]	--	--	--
BT_Q_SG_ZJU_Unigene11621	BT_Q_ZJU_Singletons22851	1	3828.57	518.919	2.88322	up	0	0	gi|847761|gb|AAA87006.1|	2e-28	subtilisin-related protease SPC3 [Branchiostoma californiense]	sp|P28840|NEC1_RAT	2e-26	Neuroendocrine convertase 1 OS=Rattus norvegicus GN=Pcsk1 PE=2 SV=1
BT_Q_SG_ZJU_Unigene11622	BT_Q_ZJU_Singletons35985	1	2899	789.409	1.87671	up	0	0	--	--	--	--	--	--
BT_Q_SG_ZJU_Unigene11624	BT_Q_ZJU_Singletons147026	0.9925	1051.43	174.644	2.58987	up	0	0	--	--	--	--	--	--
BT_Q_SG_ZJU_Unigene11627	BT_Q_ZJU_Singletons160509	1	644.601	1624.39	-1.33342	down	0.000156816	0.000661387	gi|74095993|ref|NP_001027852.1|	3e-15	protein HIRA [Takifugu rubripes] >gi|3023946|sp|O42611.1|HIRA_FUGRU RecName: Full=Protein HIRA; AltName: Full=TUP1-like enhancer of split protein 1 >gi|2352031|gb|AAC60369.1| Tuple1/HirA [Takifugu rubripes] >gi|2352036|gb|AAC60370.1| Tuple1/HirA [Takifugu rubripes]	sp|O42611|HIRA_TAKRU	6e-16	Protein HIRA OS=Takifugu rubripes GN=hira PE=2 SV=1
BT_Q_SG_ZJU_Unigene11628	BT_Q_ZJU_Singletons26904	1	1661.66	240.559	2.78816	up	0	0	--	--	--	--	--	--
BT_Q_SG_ZJU_Unigene11638	BT_Q_ZJU_Singletons22672	1	1514.96	130.851	3.53328	up	0	0	--	--	--	--	--	--
BT_Q_SG_ZJU_Unigene11645	BT_Q_ZJU_Singletons23592	1	1093.77	343.369	1.67148	up	0.000204	0.000835858	--	--	--	--	--	--
BT_Q_SG_ZJU_Unigene11646	BT_Q_ZJU_Singletons3209	1	719.265	2322.51	-1.69109	down	1.71e-08	1.28e-07	gi|158301859|ref|XP_321486.3|	5e-11	AGAP001612-PA [Anopheles gambiae str. PEST] >gi|157012675|gb|EAA00892.3| AGAP001612-PA [Anopheles gambiae str. PEST]	sp|Q7SGP2|PEX6_NEUCR	1e-09	Peroxisomal biogenesis factor 6 OS=Neurospora crassa GN=pex-6 PE=3 SV=1
BT_Q_SG_ZJU_Unigene11648	BT_Q_ZJU_Singletons119819	1	269.907	1721.54	-2.67317	down	2.6e-05	0.000131146	--	--	--	--	--	--
BT_Q_SG_ZJU_Unigene11673	BT_Q_ZJU_Singletons32396	1	2048.76	332.971	2.62128	up	0	0	--	--	--	--	--	--
BT_Q_SG_ZJU_Unigene11681	BT_Q_ZJU_Singletons153867	0.9969	1219.21	390.766	1.64156	up	6e-06	3.42e-05	--	--	--	--	--	--
BT_Q_SG_ZJU_Unigene11690	BT_Q_ZJU_Singletons159159	0.9972	2043.79	78.0075	4.71149	up	0	0	--	--	--	--	--	--
BT_Q_SG_ZJU_Unigene11695	BT_Q_ZJU_Singletons112455	1	291.701	1639.61	-2.49079	down	0.000156828	0.000660103	--	--	--	--	--	--
BT_Q_SG_ZJU_Unigene11698	BT_Q_ZJU_Singletons164478	1	478.734	2003.86	-2.06549	down	2.77e-08	2.04e-07	--	--	--	--	--	--
BT_Q_SG_ZJU_Unigene11705	BT_Q_ZJU_Singletons31959	0.9945	2580.43	987.523	1.38572	up	0	0	--	--	--	--	--	--
BT_Q_SG_ZJU_Unigene11709	BT_Q_ZJU_Singletons31786	0.9969	2299.27	649.412	1.82397	up	0	0	--	--	--	--	--	--
BT_Q_SG_ZJU_Unigene11714	BT_Q_ZJU_Singletons33687	0.9943	1064.34	206.841	2.36336	up	0	0	--	--	--	--	--	--
BT_Q_SG_ZJU_Unigene11723	BT_Q_ZJU_Singletons135744	1	2092.09	103.531	4.33681	up	0	0	--	--	--	--	--	--
BT_Q_SG_ZJU_Unigene11732	BT_Q_ZJU_Singletons137906	1	1154.26	284.709	2.0194	up	1.8e-05	9.4e-05	--	--	--	--	--	--
BT_Q_SG_ZJU_Unigene11734	BT_Q_ZJU_Singletons159845	0.991	1791.79	304.511	2.55684	up	0	0	--	--	--	--	--	--
BT_Q_SG_ZJU_Unigene11737	BT_Q_ZJU_Singletons35130	0.9974	538.386	1584.91	-1.55769	down	1.02e-05	5.5e-05	gi|110751044|ref|XP_394347.3|	6e-57	PREDICTED: similar to Protein C12orf4 [Apis mellifera]	sp|Q91YN0|CL004_MOUSE	1e-43	Uncharacterized protein C12orf4 homolog OS=Mus musculus GN=D6Wsu163e PE=1 SV=1
BT_Q_SG_ZJU_Unigene11747	BT_Q_ZJU_Singletons1986	0.9973	2815.27	290.774	3.2753	up	0	0	--	--	--	sp|O54880|RPH3L_RAT	4e-06	Rab effector Noc2 OS=Rattus norvegicus GN=Rph3al PE=1 SV=1
BT_Q_SG_ZJU_Unigene11750	BT_Q_ZJU_Singletons21800	1	3662.91	599.723	2.61062	up	0	0	--	--	--	--	--	--
BT_Q_SG_ZJU_Unigene11763	BT_Q_ZJU_Singletons141653	1	2134.72	110.629	4.27025	up	0	0	--	--	--	--	--	--
BT_Q_SG_ZJU_Unigene11765	BT_Q_ZJU_Singletons113678	1	1344.57	183.772	2.87115	up	0	0	--	--	--	--	--	--
BT_Q_SG_ZJU_Unigene11771	BT_Q_ZJU_Singletons30817	1	669.44	1983.03	-1.56668	down	8.76e-06	4.83e-05	--	--	--	--	--	--
BT_Q_SG_ZJU_Unigene11774	BT_Q_ZJU_Singletons149468	1	2645.85	65.9218	5.32683	up	0	0	--	--	--	--	--	--
BT_Q_SG_ZJU_Unigene11794	BT_Q_ZJU_Singletons156622	1	1370.88	380.782	1.84807	up	0	0	--	--	--	--	--	--
BT_Q_SG_ZJU_Unigene11803	BT_Q_ZJU_Singletons128667	1	1846.44	614.459	1.58736	up	2.4e-05	0.000122409	--	--	--	--	--	--
BT_Q_SG_ZJU_Unigene11813	BT_Q_ZJU_Singletons165038	0.9948	447.274	1940.26	-2.11702	down	1.56e-09	1.23e-08	gi|66533332|ref|XP_625023.1|	1e-45	PREDICTED: similar to ARMET-like protein precursor [Apis mellifera]	sp|B4QX46|ARMET_DROSI	9e-46	Mesencephalic astrocyte-derived neurotrophic factor homolog OS=Drosophila simulans GN=Manf PE=3 SV=1
BT_Q_SG_ZJU_Unigene11831	BT_Q_ZJU_Singletons31917	1	1065.84	191.201	2.47883	up	0	0	--	--	--	--	--	--
BT_Q_SG_ZJU_Unigene11835	BT_Q_ZJU_Singletons153604	0.9928	904.237	148.693	2.60436	up	0	0	--	--	--	--	--	--
BT_Q_SG_ZJU_Unigene11836	BT_Q_ZJU_Singletons156950	1	493.411	1351.83	-1.45405	down	0.000215104	0.000876186	gi|193699903|ref|XP_001950973.1|	4e-38	PREDICTED: similar to zinc finger protein 294 [Acyrthosiphon pisum]	sp|O94822|RN160_HUMAN	1e-36	RING finger protein 160 OS=Homo sapiens GN=RNF160 PE=1 SV=5
BT_Q_SG_ZJU_Unigene11837	BT_Q_ZJU_Singletons9588	1	1622.24	460.769	1.81587	up	0	0	gi|119113928|ref|XP_314140.3|	2e-20	AGAP005236-PA [Anopheles gambiae str. PEST] >gi|116128355|gb|EAA09398.3| AGAP005236-PA [Anopheles gambiae str. PEST]	sp|Q290X1|R1AP1_DROPS	6e-21	RAG1-activating protein 1 homolog OS=Drosophila pseudoobscura pseudoobscura GN=slv PE=3 SV=1
BT_Q_SG_ZJU_Unigene11849	BT_Q_ZJU_Singletons156514	1	1934.16	137.341	3.81587	up	0	0	--	--	--	--	--	--
BT_Q_SG_ZJU_Unigene11850	BT_Q_ZJU_Singletons4645	0.9949	321.945	1092.51	-1.76275	down	6.49e-05	0.00029894	--	--	--	--	--	--
BT_Q_SG_ZJU_Unigene11853	BT_Q_ZJU_Singletons142558	0.9959	1860.59	214.84	3.11442	up	0	0	gi|48097366|ref|XP_393761.1|	1e-07	PREDICTED: similar to ran CG1404-PA, isoform A [Apis mellifera]	--	--	--
BT_Q_SG_ZJU_Unigene11857	BT_Q_ZJU_Singletons112197	1	2348.19	234.022	3.32683	up	0	0	--	--	--	--	--	--
BT_Q_SG_ZJU_Unigene11883	BT_Q_ZJU_Singletons15592	0.9943	2332.49	842.212	1.46962	up	0	0	--	--	--	--	--	--
BT_Q_SG_ZJU_Unigene11890	BT_Q_ZJU_Singletons22707	1	440.411	2092.44	-2.24826	down	5.59e-11	4.87e-10	gi|156545249|ref|XP_001604723.1|	5e-10	PREDICTED: similar to ced-6 [Nasonia vitripennis]	--	--	--
BT_Q_SG_ZJU_Unigene11902	BT_Q_ZJU_Singletons161022	0.9973	900.675	133.361	2.75567	up	0	0	gi|260812948|ref|XP_002601182.1|	5e-07	hypothetical protein BRAFLDRAFT_214464 [Branchiostoma floridae] >gi|229286473|gb|EEN57194.1| hypothetical protein BRAFLDRAFT_214464 [Branchiostoma floridae]	--	--	--
BT_Q_SG_ZJU_Unigene11913	BT_Q_ZJU_Singletons28669	0.9946	673.316	1635.64	-1.2805	down	0.000112603	0.000490812	gi|193643531|ref|XP_001944574.1|	7e-10	PREDICTED: similar to AGAP009487-PA [Acyrthosiphon pisum]	--	--	--
BT_Q_SG_ZJU_Unigene11915	BT_Q_ZJU_Singletons28079	1	4626.66	1902.5	1.28208	up	0	0	--	--	--	--	--	--
BT_Q_SG_ZJU_Unigene11925	BT_Q_ZJU_Singletons143064	1	827.275	2450.58	-1.56668	down	8.76e-06	4.84e-05	--	--	--	--	--	--
BT_Q_SG_ZJU_Unigene11934	BT_Q_ZJU_Singletons163180	1	703.577	2114.09	-1.58726	down	4.63e-07	3.14e-06	--	--	--	--	--	--
BT_Q_SG_ZJU_Unigene11937	BT_Q_ZJU_Singletons14726	0.9953	436.872	1732.85	-1.98787	down	5.92e-05	0.000275992	gi|193610512|ref|XP_001944243.1|	2e-30	PREDICTED: similar to AGAP006684-PA [Acyrthosiphon pisum]	sp|Q3SZ22|RM46_BOVIN	5e-21	39S ribosomal protein L46, mitochondrial OS=Bos taurus GN=MRPL46 PE=2 SV=1
BT_Q_SG_ZJU_Unigene11949	BT_Q_ZJU_Singletons10038	0.9973	795.287	2572.99	-1.6939	down	2.15e-09	1.67e-08	--	--	--	--	--	--
BT_Q_SG_ZJU_Unigene11958	BT_Q_ZJU_Singletons19228	0.9954	1000.75	247.914	2.01317	up	6e-05	0.000278419	--	--	--	--	--	--
BT_Q_SG_ZJU_Unigene11975	BT_Q_ZJU_Singletons432	1	15485.7	114.486	7.07962	up	0	0	--	--	--	--	--	--
BT_Q_SG_ZJU_Unigene11978	BT_Q_ZJU_Singletons9527	0.9939	192.081	1653.95	-3.10613	down	2.11e-05	0.000108695	--	--	--	--	--	--
BT_Q_SG_ZJU_Unigene11982	BT_Q_ZJU_Singletons31818	1	1176.36	173.149	2.76424	up	2e-06	1.23e-05	--	--	--	--	--	--
BT_Q_SG_ZJU_Unigene11983	BT_Q_ZJU_Singletons150533	1	794.96	212.083	1.90625	up	0.000192	0.000793714	--	--	--	--	--	--
BT_Q_SG_ZJU_Unigene11985	BT_Q_ZJU_Singletons2002	1	7554.71	791.717	3.25432	up	0	0	--	--	--	--	--	--
BT_Q_SG_ZJU_Unigene11987	BT_Q_ZJU_Singletons6441	1	730.007	2643.36	-1.85639	down	5.81e-11	5.05e-10	gi|66508204|ref|XP_623259.1|	8e-22	PREDICTED: similar to 26S proteasome non-ATPase regulatory subunit 9 (26S proteasome regulatory subunit p27) isoform 2 [Apis mellifera]	sp|O00233|PSMD9_HUMAN	1e-18	26S proteasome non-ATPase regulatory subunit 9 OS=Homo sapiens GN=PSMD9 PE=1 SV=2
BT_Q_SG_ZJU_Unigene11988	BT_Q_ZJU_Singletons21323	0.994	993.192	339.368	1.54922	up	7.2e-05	0.000326824	--	--	--	--	--	--
BT_Q_SG_ZJU_Unigene12004	BT_Q_ZJU_Singletons115432	1	3300.67	45.1127	6.19308	up	0	0	--	--	--	--	--	--
BT_Q_SG_ZJU_Unigene12012	BT_Q_ZJU_Singletons19501	1	340.317	1401.23	-2.04174	down	5.98e-06	3.42e-05	--	--	--	--	--	--
BT_Q_SG_ZJU_Unigene12013	BT_Q_ZJU_Singletons12901	0.9916	3566.87	371.276	3.26409	up	0	0	--	--	--	--	--	--
BT_Q_SG_ZJU_Unigene12016	BT_Q_ZJU_Singletons3897	0.9947	496.971	2783.5	-2.48567	down	3.94e-08	2.89e-07	gi|156541938|ref|XP_001601226.1|	3e-11	PREDICTED: similar to acyl-coa dehydrogenase [Nasonia vitripennis]	sp|P45953|ACADV_RAT	1e-06	Very long-chain specific acyl-CoA dehydrogenase, mitochondrial OS=Rattus norvegicus GN=Acadvl PE=1 SV=1
BT_Q_SG_ZJU_Unigene12029	BT_Q_ZJU_Singletons152333	1	711.573	66.1881	3.42637	up	4e-06	2.35e-05	--	--	--	--	--	--
BT_Q_SG_ZJU_Unigene12033	BT_Q_ZJU_Singletons14452	0.9944	436.061	1653.15	-1.92261	down	4.49e-07	3.05e-06	--	--	--	--	--	--
BT_Q_SG_ZJU_Unigene12047	BT_Q_ZJU_Singletons1764	0.9974	608.339	1687.87	-1.47226	down	9.25e-06	5.05e-05	gi|170035381|ref|XP_001845548.1|	2e-34	chloride channel protein 2 [Culex quinquefasciatus] >gi|167877364|gb|EDS40747.1| chloride channel protein 2 [Culex quinquefasciatus]	sp|Q9VGH7|CLCN2_DROME	9e-20	Chloride channel protein 2 OS=Drosophila melanogaster GN=CG31116 PE=2 SV=3
BT_Q_SG_ZJU_Unigene12077	BT_Q_ZJU_Singletons21636	1	574.129	2206.33	-1.9422	down	2.58e-10	2.16e-09	gi|193688150|ref|XP_001946111.1|	5e-24	PREDICTED: similar to GTP-binding protein hflx, partial [Acyrthosiphon pisum]	sp|Q0WTB4|Y3725_ARATH	1e-06	GTP-binding protein At3g49725, chloroplastic OS=Arabidopsis thaliana GN=At3g49725 PE=2 SV=2
BT_Q_SG_ZJU_Unigene12078	BT_Q_ZJU_Singletons153709	0.9969	587.047	2556.69	-2.12273	down	2.29e-10	1.92e-09	gi|239791652|dbj|BAH72264.1|	7e-23	ACYPI44311 [Acyrthosiphon pisum]	sp|Q5RAK3|RN180_PONAB	2e-09	RING finger protein 180 OS=Pongo abelii GN=RNF180 PE=2 SV=1
BT_Q_SG_ZJU_Unigene12082	BT_Q_ZJU_Singletons144371	1	1197.62	296.684	2.01317	up	6e-05	0.000278729	--	--	--	--	--	--
BT_Q_SG_ZJU_Unigene12087	BT_Q_ZJU_Singletons18156	0.9976	1183.64	538.822	1.13535	up	0.000214	0.000872542	--	--	--	--	--	--
BT_Q_SG_ZJU_Unigene12097	BT_Q_ZJU_Singletons3878	1	561.96	2645.05	-2.23476	down	1.78e-13	1.67e-12	--	--	--	--	--	--
BT_Q_SG_ZJU_Unigene12111	BT_Q_ZJU_Singletons19986	1	5545.36	1496.57	1.88962	up	0	0	--	--	--	--	--	--
BT_Q_SG_ZJU_Unigene12123	BT_Q_ZJU_Singletons18850	1	1345.87	432.041	1.6393	up	7.4e-05	0.000334082	--	--	--	--	--	--
BT_Q_SG_ZJU_Unigene12127	BT_Q_ZJU_Singletons130329	1	707.997	94.0793	2.91179	up	2.6e-05	0.000131643	--	--	--	--	--	--
BT_Q_SG_ZJU_Unigene12132	BT_Q_ZJU_Singletons35515	1	699.213	1881.47	-1.42806	down	2.62e-06	1.58e-05	--	--	--	--	--	--
BT_Q_SG_ZJU_Unigene12143	BT_Q_ZJU_Singletons12900	0.9973	1535.6	729.487	1.07385	up	0.00015	0.00063586	--	--	--	--	--	--
BT_Q_SG_ZJU_Unigene12144	BT_Q_ZJU_Singletons120516	0.994	2515.92	55.7196	5.49676	up	0	0	gi|33285936|gb|AAQ01583.1|	3e-07	reverse transcriptase [Aedes albopictus]	--	--	--
BT_Q_SG_ZJU_Unigene12154	BT_Q_ZJU_Singletons618	0.9968	743.098	3661.41	-2.30078	down	2e-15	1.93e-14	gi|91081945|ref|XP_966990.1|	9e-66	PREDICTED: similar to ATP-binding cassette sub-family F member 2 [Tribolium castaneum]	sp|Q9UG63|ABCF2_HUMAN	7e-43	ATP-binding cassette sub-family F member 2 OS=Homo sapiens GN=ABCF2 PE=1 SV=2
BT_Q_SG_ZJU_Unigene12156	BT_Q_ZJU_Singletons145268	1	1361.27	447.695	1.60436	up	6.6e-05	0.000303556	gi|190702506|gb|ACE75391.1|	2e-08	cation-transporting ATPase [Glyptapanteles indiensis]	--	--	--
BT_Q_SG_ZJU_Unigene12159	BT_Q_ZJU_Singletons108193	1	1931.41	559.222	1.78816	up	2.2e-05	0.00011276	--	--	--	--	--	--
BT_Q_SG_ZJU_Unigene12164	BT_Q_ZJU_Singletons117684	1	1565.46	418.487	1.90333	up	2.4e-05	0.000122559	--	--	--	--	--	--
BT_Q_SG_ZJU_Unigene12174	BT_Q_ZJU_Singletons165929	1	3295.7	165.719	4.31377	up	0	0	--	--	--	--	--	--
BT_Q_SG_ZJU_Unigene12177	BT_Q_ZJU_Singletons106136	1	207.346	1711	-3.04473	down	3.85e-05	0.000188108	--	--	--	--	--	--
BT_Q_SG_ZJU_Unigene12181	BT_Q_ZJU_Singletons7725	0.9946	210.411	1675.9	-2.99365	down	4.71e-11	4.14e-10	--	--	--	--	--	--
BT_Q_SG_ZJU_Unigene12193	BT_Q_ZJU_Singletons148076	1	1701.59	301.177	2.4982	up	0	0	--	--	--	--	--	--
BT_Q_SG_ZJU_Unigene12194	BT_Q_ZJU_Singletons149976	1	1838.44	226.527	3.02073	up	0	0	--	--	--	--	--	--
BT_Q_SG_ZJU_Unigene12210	BT_Q_ZJU_Singletons32674	0.9976	5306.64	1758.85	1.59317	up	0	0	--	--	--	--	--	--
BT_Q_SG_ZJU_Unigene12218	BT_Q_ZJU_Singletons134378	0.9952	1279.46	135.013	3.24437	up	0	0	--	--	--	--	--	--
BT_Q_SG_ZJU_Unigene12222	BT_Q_ZJU_Singletons126644	1	1165.77	209.126	2.47883	up	4e-06	2.35e-05	--	--	--	--	--	--
BT_Q_SG_ZJU_Unigene12223	BT_Q_ZJU_Singletons35612	0.9947	834.912	269.594	1.63084	up	5.2e-05	0.000245673	--	--	--	--	--	--
BT_Q_SG_ZJU_Unigene12230	BT_Q_ZJU_Singletons143582	0.995	943.996	235.198	2.0049	up	0.000192	0.000794502	gi|283580029|gb|ADB27912.1|	2e-31	Arp2/3 complex p21 subunit [Spodoptera frugiperda]	sp|Q9JM76|ARPC3_MOUSE	2e-25	Actin-related protein 2/3 complex subunit 3 OS=Mus musculus GN=Arpc3 PE=1 SV=3
BT_Q_SG_ZJU_Unigene12232	BT_Q_ZJU_Singletons17530	0.9907	682.755	2321.27	-1.76547	down	7.22e-08	5.2e-07	--	--	--	--	--	--
BT_Q_SG_ZJU_Unigene12253	BT_Q_ZJU_Singletons138521	1	2620.59	371.137	2.81987	up	0	0	gi|157167499|ref|XP_001654826.1|	2e-42	dolichyl-diphosphooligosaccharide protein glycosyltransferase [Aedes aegypti] >gi|108882451|gb|EAT46676.1| dolichyl-diphosphooligosaccharide protein glycosyltransferase [Aedes aegypti]	sp|Q24319|OST48_DROME	1e-39	Dolichyl-diphosphooligosaccharide--protein glycosyltransferase 48 kDa subunit OS=Drosophila melanogaster GN=Ost48 PE=2 SV=2
BT_Q_SG_ZJU_Unigene12263	BT_Q_ZJU_Singletons11565	1	573.729	2421.09	-2.07722	down	2.55e-11	2.27e-10	gi|289740169|gb|ADD18832.1|	6e-64	actin-related protein ARP2/3 complex subunit ARPC2 [Glossina morsitans morsitans]	sp|Q9VIM5|ARPC2_DROME	6e-62	Probable actin-related protein 2/3 complex subunit 2 OS=Drosophila melanogaster GN=Arc-p34 PE=1 SV=2
BT_Q_SG_ZJU_Unigene12264	BT_Q_ZJU_Singletons156760	0.9935	920.859	79.537	3.53328	up	0	0	gi|254029368|gb|ACT53737.1|	6e-06	feruloyl esterase-like protein Est2 [Reticulitermes flavipes]	--	--	--
BT_Q_SG_ZJU_Unigene12271	BT_Q_ZJU_Singletons8244	1	985.254	2736.26	-1.47364	down	1.65e-09	1.3e-08	gi|53734470|gb|AAH83505.1|	5e-31	Arginyl-tRNA synthetase [Danio rerio]	sp|Q5RA20|SYRC_PONAB	1e-26	Arginyl-tRNA synthetase, cytoplasmic OS=Pongo abelii GN=RARS PE=2 SV=1
BT_Q_SG_ZJU_Unigene12279	BT_Q_ZJU_Singletons166430	0.9977	582.497	126.263	2.20582	up	6e-06	3.4e-05	gi|193688412|ref|XP_001943684.1|	1e-16	PREDICTED: similar to arf6 guanine nucleotide exchange factor [Acyrthosiphon pisum]	--	--	--
BT_Q_SG_ZJU_Unigene12281	BT_Q_ZJU_Singletons28726	1	1053	2988.77	-1.50505	down	5.17e-06	2.98e-05	gi|66519267|ref|XP_625217.1|	2e-57	PREDICTED: similar to 26S proteasome non-ATPase regulatory subunit 8 (26S proteasome regulatory subunit S14) (p31) [Apis mellifera]	sp|Q9CX56|PSMD8_MOUSE	3e-55	26S proteasome non-ATPase regulatory subunit 8 OS=Mus musculus GN=Psmd8 PE=2 SV=1
BT_Q_SG_ZJU_Unigene12282	BT_Q_ZJU_Singletons22042	0.9974	1035.36	2169.35	-1.06713	down	8.57e-05	0.000381611	gi|239792289|dbj|BAH72502.1|	2e-30	ACYPI003318 [Acyrthosiphon pisum]	--	--	--
BT_Q_SG_ZJU_Unigene12290	BT_Q_ZJU_Singletons139407	1	661.462	2856.61	-2.11057	down	6.21e-08	4.5e-07	--	--	--	--	--	--
BT_Q_SG_ZJU_Unigene12296	BT_Q_ZJU_Singletons10333	1	5544.34	565.554	3.29328	up	0	0	--	--	--	--	--	--
BT_Q_SG_ZJU_Unigene12313	BT_Q_ZJU_Singletons2784	0.993	551.218	1845.81	-1.74356	down	9.09e-06	4.98e-05	gi|3876151|emb|CAB02087.1|	5e-16	C. elegans protein F20G2.2, confirmed by transcript evidence [Caenorhabditis elegans]	sp|Q7Z9I4|YCP6_SCHPO	3e-08	Uncharacterized oxidoreductase C663.06c OS=Schizosaccharomyces pombe GN=SPCC663.06c PE=2 SV=1
BT_Q_SG_ZJU_Unigene12314	BT_Q_ZJU_Singletons108925	1	2928.92	422.75	2.79249	up	0	0	--	--	--	--	--	--
BT_Q_SG_ZJU_Unigene12317	BT_Q_ZJU_Singletons128716	1	722.52	105.61	2.77429	up	4.4e-05	0.000211474	--	--	--	--	--	--
BT_Q_SG_ZJU_Unigene12321	BT_Q_ZJU_Singletons161030	0.9931	2636	70.7696	5.21907	up	0	0	gi|66509812|ref|XP_393561.2|	8e-43	PREDICTED: similar to Angiotensin converting enzyme CG8827-PA, isoform A [Apis mellifera]	sp|Q10751|ACE_CHICK	7e-37	Angiotensin-converting enzyme (Fragment) OS=Gallus gallus GN=ACE PE=2 SV=1
BT_Q_SG_ZJU_Unigene12324	BT_Q_ZJU_Singletons150515	1	2851.18	90.0705	4.98436	up	0	0	--	--	--	--	--	--
BT_Q_SG_ZJU_Unigene12325	BT_Q_ZJU_Singletons2597	0.9972	533.679	1638.16	-1.61803	down	9.01e-06	4.95e-05	gi|66524379|ref|XP_393961.2|	1e-53	PREDICTED: similar to CG3590-PA [Apis mellifera]	sp|P54822|PUR8_MOUSE	2e-51	Adenylosuccinate lyase OS=Mus musculus GN=Adsl PE=2 SV=1
BT_Q_SG_ZJU_Unigene12326	BT_Q_ZJU_Singletons3907	0.9953	1837.39	501.006	1.87476	up	0	0	--	--	--	--	--	--
BT_Q_SG_ZJU_Unigene12347	BT_Q_ZJU_Singletons13459	1	2438.66	583.292	2.0638	up	0	0	--	--	--	--	--	--
BT_Q_SG_ZJU_Unigene12358	BT_Q_ZJU_Singletons138126	1	561.6	2124.04	-1.9192	down	7.74e-06	4.32e-05	--	--	--	--	--	--
BT_Q_SG_ZJU_Unigene12367	BT_Q_ZJU_Singletons29631	0.9977	1000.75	324.853	1.62322	up	2e-06	1.26e-05	--	--	--	--	--	--
BT_Q_SG_ZJU_Unigene12368	BT_Q_ZJU_Singletons159270	0.9913	2669.43	806.227	1.72727	up	0	0	--	--	--	--	--	--
BT_Q_SG_ZJU_Unigene12392	BT_Q_ZJU_Singletons140829	1	5306.64	1673.85	1.66463	up	0	0	--	--	--	--	--	--
BT_Q_SG_ZJU_Unigene12394	BT_Q_ZJU_Singletons62	0.9928	709.874	2640.71	-1.89529	down	4.58e-12	4.19e-11	gi|156542993|ref|XP_001603137.1|	3e-15	PREDICTED: similar to ENSANGP00000014729 [Nasonia vitripennis]	--	--	--
BT_Q_SG_ZJU_Unigene12398	BT_Q_ZJU_Singletons2500	0.9941	3315.09	1426.16	1.21691	up	0	0	--	--	--	--	--	--
BT_Q_SG_ZJU_Unigene12401	BT_Q_ZJU_Singletons29983	1	4773.6	167.908	4.82933	up	0	0	--	--	--	--	--	--
BT_Q_SG_ZJU_Unigene12412	BT_Q_ZJU_Singletons129817	1	1027.83	236.386	2.12038	up	5.6e-05	0.000261899	--	--	--	--	--	--
BT_Q_SG_ZJU_Unigene12414	BT_Q_ZJU_Singletons24261	0.9933	487.032	1568.47	-1.68727	down	3.76e-07	2.59e-06	--	--	--	--	--	--
BT_Q_SG_ZJU_Unigene12415	BT_Q_ZJU_Singletons12554	0.9954	2246.72	294.695	2.93053	up	0	0	--	--	--	--	--	--
BT_Q_SG_ZJU_Unigene12417	BT_Q_ZJU_Singletons124740	1	1438.53	151.798	3.24437	up	0	0	--	--	--	--	--	--
BT_Q_SG_ZJU_Unigene12444	BT_Q_ZJU_Singletons16555	0.9927	455.406	1824.52	-2.00229	down	2.19e-06	1.34e-05	--	--	--	--	--	--
BT_Q_SG_ZJU_Unigene12446	BT_Q_ZJU_Singletons154567	1	2534.55	332.832	2.92887	up	0	0	gi|289742031|gb|ADD19763.1|	2e-16	small nuclear ribonucleoprotein LsM3 [Glossina morsitans morsitans]	sp|P62311|LSM3_MOUSE	1e-15	U6 snRNA-associated Sm-like protein LSm3 OS=Mus musculus GN=Lsm3 PE=2 SV=2
BT_Q_SG_ZJU_Unigene12455	BT_Q_ZJU_Singletons153065	0.9964	1458.85	483.143	1.59431	up	6e-06	3.4e-05	--	--	--	--	--	--
BT_Q_SG_ZJU_Unigene12456	BT_Q_ZJU_Singletons140283	0.9915	200.7	1760.17	-3.1326	down	7.27e-08	5.22e-07	--	--	--	--	--	--
BT_Q_SG_ZJU_Unigene12458	BT_Q_ZJU_Singletons158896	0.9923	2293.86	163.635	3.80922	up	0	0	--	--	--	--	--	--
BT_Q_SG_ZJU_Unigene12459	BT_Q_ZJU_Singletons12182	0.9977	509.685	1867.82	-1.87368	down	5.93e-09	4.49e-08	--	--	--	--	--	--
BT_Q_SG_ZJU_Unigene12466	BT_Q_ZJU_Singletons116794	1	745.457	2741.4	-1.87872	down	1.38e-05	7.33e-05	--	--	--	--	--	--
BT_Q_SG_ZJU_Unigene12468	BT_Q_ZJU_Singletons10675	0.9958	391.365	1762.97	-2.17142	down	5.72e-06	3.28e-05	gi|91077322|ref|XP_974743.1|	3e-46	PREDICTED: similar to Prp18 CG6011-PA [Tribolium castaneum]	sp|Q5EAV6|PRP18_XENLA	5e-31	Pre-mRNA-splicing factor 18 OS=Xenopus laevis GN=prpf18 PE=2 SV=1
BT_Q_SG_ZJU_Unigene12477	BT_Q_ZJU_Singletons3414	1	2191.64	861.202	1.34759	up	6e-06	3.39e-05	--	--	--	--	--	--
BT_Q_SG_ZJU_Unigene12479	BT_Q_ZJU_Singletons35920	0.991	282.065	1551.72	-2.45977	down	1.36e-05	7.21e-05	--	--	--	--	--	--
BT_Q_SG_ZJU_Unigene12495	BT_Q_ZJU_Singletons4230	1	1655.77	400.538	2.04749	up	0	0	--	--	--	--	--	--
BT_Q_SG_ZJU_Unigene12497	BT_Q_ZJU_Singletons138738	1	343.303	2332.01	-2.76402	down	5.57e-09	4.24e-08	gi|156541018|ref|XP_001602925.1|	2e-29	PREDICTED: similar to ENSANGP00000014264 [Nasonia vitripennis]	sp|Q9P287|BCCIP_HUMAN	6e-24	BRCA2 and CDKN1A-interacting protein OS=Homo sapiens GN=BCCIP PE=1 SV=1
BT_Q_SG_ZJU_Unigene12498	BT_Q_ZJU_Singletons17305	1	246.529	2277.57	-3.20767	down	7.15e-11	6.17e-10	--	--	--	--	--	--
BT_Q_SG_ZJU_Unigene12502	BT_Q_ZJU_Singletons24003	1	277.564	2516.16	-3.18033	down	4.87e-13	4.51e-12	gi|156545275|ref|XP_001605178.1|	2e-54	PREDICTED: similar to CG1531-PB [Nasonia vitripennis]	sp|Q5U430|UBR3_MOUSE	2e-38	E3 ubiquitin-protein ligase UBR3 OS=Mus musculus GN=Ubr3 PE=1 SV=3
BT_Q_SG_ZJU_Unigene12526	BT_Q_ZJU_Singletons31585	0.9973	1415.35	297.497	2.25021	up	0	0	--	--	--	--	--	--
BT_Q_SG_ZJU_Unigene12532	BT_Q_ZJU_Singletons17447	0.9917	454.698	2664.55	-2.55091	down	6.19e-10	5.04e-09	--	--	--	--	--	--
BT_Q_SG_ZJU_Unigene12536	BT_Q_ZJU_Singletons161541	0.9942	1588.15	227.917	2.80076	up	0	0	--	--	--	--	--	--
BT_Q_SG_ZJU_Unigene12548	BT_Q_ZJU_Singletons156125	1	721.826	1823.62	-1.33708	down	4.66e-05	0.000222869	--	--	--	--	--	--
BT_Q_SG_ZJU_Unigene12550	BT_Q_ZJU_Singletons118550	1	1365.23	65.3086	4.38572	up	0	0	--	--	--	--	--	--
BT_Q_SG_ZJU_Unigene12556	BT_Q_ZJU_Singletons34463	0.9956	5702.01	2103.62	1.4386	up	0	0	--	--	--	--	--	--
BT_Q_SG_ZJU_Unigene12561	BT_Q_ZJU_Singletons126113	1	582.884	2648.93	-2.18413	down	6.81e-07	4.56e-06	gi|187179333|ref|NP_001119644.1|	6e-87	protein phosphatase 2 catalytic subunit alpha isoform [Acyrthosiphon pisum] >gi|239792444|dbj|BAH72564.1| ACYPI000060 [Acyrthosiphon pisum]	sp|P23696|PP2A_DROME	3e-87	Serine/threonine-protein phosphatase PP2A OS=Drosophila melanogaster GN=mts PE=1 SV=1
BT_Q_SG_ZJU_Unigene12564	BT_Q_ZJU_Singletons35796	0.9975	2517.32	907.866	1.47134	up	0	0	--	--	--	--	--	--
BT_Q_SG_ZJU_Unigene12566	BT_Q_ZJU_Singletons158858	1	726.244	212.309	1.77429	up	4e-05	0.00019404	--	--	--	--	--	--
BT_Q_SG_ZJU_Unigene12570	BT_Q_ZJU_Singletons135044	1	1316.74	437.425	1.58987	up	0.000162	0.000679813	--	--	--	--	--	--
BT_Q_SG_ZJU_Unigene12589	BT_Q_ZJU_Singletons109667	1	4515.75	600.057	2.91179	up	0	0	--	--	--	--	--	--
BT_Q_SG_ZJU_Unigene12590	BT_Q_ZJU_Singletons31877	1	458.183	1707.79	-1.89814	down	0.000162492	0.00068119	gi|66518026|ref|XP_393004.2|	1e-16	PREDICTED: similar to CG1677-PA [Apis mellifera]	sp|Q1LUE5|ZCH18_DANRE	1e-07	Zinc finger CCCH domain-containing protein 18 OS=Danio rerio GN=zc3h18 PE=1 SV=1
BT_Q_SG_ZJU_Unigene12600	BT_Q_ZJU_Singletons105753	1	313.092	1709.92	-2.44927	down	0.000227642	0.000923646	--	--	--	--	--	--
BT_Q_SG_ZJU_Unigene12622	BT_Q_ZJU_Singletons158492	1	1762.17	215.644	3.03063	up	0	0	--	--	--	--	--	--
BT_Q_SG_ZJU_Unigene12623	BT_Q_ZJU_Singletons139626	1	758.593	2606.2	-1.78055	down	1.61e-06	1.03e-05	gi|157120564|ref|XP_001653666.1|	2e-68	arp2/3 complex 20 kd subunit [Aedes aegypti] >gi|157120566|ref|XP_001653667.1| arp2/3 complex 20 kd subunit [Aedes aegypti] >gi|157120568|ref|XP_001653668.1| arp2/3 complex 20 kd subunit [Aedes aegypti] >gi|157120570|ref|XP_001653669.1| arp2/3 complex 20 kd subunit [Aedes aegypti] >gi|170058552|ref|XP_001864970.1| ARP2/3 complex 20 kDa subunit [Culex quinquefasciatus] >gi|108874906|gb|EAT39131.1|…	sp|P59999|ARPC4_MOUSE	5e-67	Actin-related protein 2/3 complex subunit 4 OS=Mus musculus GN=Arpc4 PE=1 SV=3
BT_Q_SG_ZJU_Unigene12627	BT_Q_ZJU_Singletons162371	1	3557.86	360.034	3.3048	up	0	0	--	--	--	--	--	--
BT_Q_SG_ZJU_Unigene12644	BT_Q_ZJU_Singletons25725	1	1020.95	345.946	1.5613	up	2e-06	1.25e-05	--	--	--	--	--	--
BT_Q_SG_ZJU_Unigene12645	BT_Q_ZJU_Singletons159128	0.9921	2526.92	1230.92	1.03764	up	9e-05	0.000398121	--	--	--	--	--	--
BT_Q_SG_ZJU_Unigene12650	BT_Q_ZJU_Singletons26412	1	843.222	2043.17	-1.27683	down	3.19e-06	1.91e-05	gi|193610945|ref|XP_001943598.1|	2e-61	PREDICTED: similar to pre-mRNA-splicing helicase BRR2 [Acyrthosiphon pisum]	sp|O75643|U520_HUMAN	4e-57	U5 small nuclear ribonucleoprotein 200 kDa helicase OS=Homo sapiens GN=SNRNP200 PE=1 SV=2
BT_Q_SG_ZJU_Unigene12651	BT_Q_ZJU_Singletons24340	0.9974	4366.81	448.338	3.28392	up	0	0	--	--	--	--	--	--
BT_Q_SG_ZJU_Unigene12653	BT_Q_ZJU_Singletons131865	0.9951	1074.34	64.2414	4.0638	up	0	0	--	--	--	--	--	--
BT_Q_SG_ZJU_Unigene12657	BT_Q_ZJU_Singletons1105	1	3190.75	822.805	1.95527	up	0	0	gi|91085965|ref|XP_971530.1|	5e-19	PREDICTED: similar to AGAP005404-PA [Tribolium castaneum]	--	--	--
BT_Q_SG_ZJU_Unigene12671	BT_Q_ZJU_Singletons22954	1	534.784	2366.39	-2.14566	down	7.81e-10	6.25e-09	gi|193620197|ref|XP_001944904.1|	5e-37	PREDICTED: similar to leucine rich repeat (in flii) interacting protein [Acyrthosiphon pisum]	sp|Q4V7E8|LRRF2_RAT	3e-26	Leucine-rich repeat flightless-interacting protein 2 OS=Rattus norvegicus GN=Lrrfip2 PE=2 SV=1
BT_Q_SG_ZJU_Unigene12681	BT_Q_ZJU_Singletons165303	1	728.121	1654.48	-1.18413	down	3.23e-05	0.000159889	--	--	--	--	--	--
BT_Q_SG_ZJU_Unigene12690	BT_Q_ZJU_Singletons135009	1	370.962	2067.38	-2.47846	down	6.92e-07	4.62e-06	gi|110762775|ref|XP_001120160.1|	5e-18	PREDICTED: similar to phosphatidylinositol glycan, class Q [Apis mellifera]	sp|Q9QYT7|PIGQ_MOUSE	4e-12	Phosphatidylinositol N-acetylglucosaminyltransferase subunit Q OS=Mus musculus GN=Pigq PE=2 SV=3
BT_Q_SG_ZJU_Unigene12691	BT_Q_ZJU_Singletons142365	0.9959	901.911	84.7488	3.41172	up	0	0	--	--	--	--	--	--
BT_Q_SG_ZJU_Unigene12693	BT_Q_ZJU_Singletons163132	1	7025.32	349.115	4.33079	up	0	0	--	--	--	--	--	--
BT_Q_SG_ZJU_Unigene12696	BT_Q_ZJU_Singletons133941	1	1929	212.949	3.17927	up	0	0	--	--	--	--	--	--
BT_Q_SG_ZJU_Unigene12699	BT_Q_ZJU_Singletons166132	0.9943	3646.81	148.923	4.61399	up	0	0	--	--	--	--	--	--
BT_Q_SG_ZJU_Unigene12702	BT_Q_ZJU_Singletons15137	1	469.052	1963.33	-2.06549	down	7.87e-07	5.23e-06	gi|157129136|ref|XP_001655305.1|	3e-39	maintenance of killer 16 (mak16) protein [Aedes aegypti] >gi|108872346|gb|EAT36571.1| maintenance of killer 16 (mak16) protein [Aedes aegypti]	sp|Q66L33|MK16A_XENLA	4e-35	Protein MAK16 homolog A OS=Xenopus laevis GN=mak16-a PE=2 SV=1
BT_Q_SG_ZJU_Unigene12706	BT_Q_ZJU_Singletons5110	0.9971	678.667	2629.71	-1.95413	down	1.85e-10	1.56e-09	gi|91086165|ref|XP_970259.1|	2e-75	PREDICTED: similar to GA17483-PA [Tribolium castaneum]	sp|P54813|YME1_CAEEL	7e-56	Protein YME1 homolog OS=Caenorhabditis elegans GN=ymel-1 PE=2 SV=1
BT_Q_SG_ZJU_Unigene12713	BT_Q_ZJU_Singletons22499	1	665.408	1880.56	-1.49885	down	2.87e-07	2e-06	gi|110766155|ref|XP_395739.3|	1e-43	PREDICTED: similar to tuberous sclerosis 2 isoform 3 [Apis mellifera]	sp|P49815|TSC2_HUMAN	7e-30	Tuberin OS=Homo sapiens GN=TSC2 PE=1 SV=2
BT_Q_SG_ZJU_Unigene12719	BT_Q_ZJU_Singletons30877	0.9979	1039.31	2280.02	-1.13342	down	1.61e-06	1.03e-05	gi|170039925|ref|XP_001847768.1|	3e-81	WD repeat protein 82 [Culex quinquefasciatus] >gi|167863510|gb|EDS26893.1| WD repeat protein 82 [Culex quinquefasciatus]	sp|Q8BFQ4|WDR82_MOUSE	5e-58	WD repeat-containing protein 82 OS=Mus musculus GN=Wdr82 PE=1 SV=1
BT_Q_SG_ZJU_Unigene12730	BT_Q_ZJU_Singletons151599	1	706.222	98.5357	2.8414	up	2e-06	1.28e-05	gi|193678901|ref|XP_001946905.1|	1e-32	PREDICTED: similar to alpha1,6-fucosyltransferase CG2448-PA [Acyrthosiphon pisum]	sp|Q9VYV5|FUT8_DROME	2e-30	Alpha-(1,6)-fucosyltransferase OS=Drosophila melanogaster GN=FucT6 PE=1 SV=1
BT_Q_SG_ZJU_Unigene12734	BT_Q_ZJU_Singletons142598	0.9918	1347.32	268.55	2.32683	up	0	0	--	--	--	--	--	--
BT_Q_SG_ZJU_Unigene12737	BT_Q_ZJU_Singletons14949	0.9959	422.219	1180.79	-1.48369	down	3.32e-05	0.000163768	--	--	--	--	--	--
BT_Q_SG_ZJU_Unigene12738	BT_Q_ZJU_Singletons147851	0.9963	1777.63	96.0092	4.21064	up	0	0	--	--	--	--	--	--
BT_Q_SG_ZJU_Unigene12741	BT_Q_ZJU_Singletons12786	0.9921	6819.82	1034.33	2.72103	up	0	0	gi|225718414|gb|ACO15053.1|	2e-30	Signal peptidase complex subunit 1 [Caligus clemensi]	sp|Q9VAL0|SPCS1_DROME	1e-25	Signal peptidase complex subunit 1 OS=Drosophila melanogaster GN=Spase12 PE=1 SV=2
BT_Q_SG_ZJU_Unigene12743	BT_Q_ZJU_Singletons32515	1	356.945	2305.16	-2.69109	down	2.28e-11	2.03e-10	gi|91087961|ref|XP_972932.1|	5e-33	PREDICTED: similar to multiple inositol polyphosphate phosphatase [Tribolium castaneum]	sp|Q9UNW1|MINP1_HUMAN	6e-11	Multiple inositol polyphosphate phosphatase 1 OS=Homo sapiens GN=MINPP1 PE=1 SV=1
BT_Q_SG_ZJU_Unigene12744	BT_Q_ZJU_Singletons25101	1	1827.38	254.966	2.8414	up	0	0	--	--	--	--	--	--
BT_Q_SG_ZJU_Unigene12746	BT_Q_ZJU_Singletons22490	1	1423.15	293.119	2.27952	up	0	0	--	--	--	--	--	--
BT_Q_SG_ZJU_Unigene12747	BT_Q_ZJU_Singletons160769	1	1321.23	440.513	1.58463	up	0	0	--	--	--	--	--	--
BT_Q_SG_ZJU_Unigene12748	BT_Q_ZJU_Singletons17263	1	291.248	1541.28	-2.40381	down	2.59e-05	0.000131775	--	--	--	--	--	--
BT_Q_SG_ZJU_Unigene12757	BT_Q_ZJU_Singletons154336	0.9967	829.383	2014.76	-1.2805	down	0.000112603	0.000491326	--	--	--	--	--	--
BT_Q_SG_ZJU_Unigene12758	BT_Q_ZJU_Singletons17190	0.993	509.685	1401.96	-1.45977	down	2.34e-05	0.000119671	--	--	--	--	--	--
BT_Q_SG_ZJU_Unigene12765	BT_Q_ZJU_Singletons123256	0.9945	344.057	1759.03	-2.35406	down	4.49e-05	0.000214924	gi|225711774|gb|ACO11733.1|	4e-16	Replication protein A 32 kDa subunit [Caligus rogercresseyi]	--	--	--
BT_Q_SG_ZJU_Unigene12768	BT_Q_ZJU_Singletons9177	0.9956	1233.18	2785.74	-1.17567	down	1.02e-07	7.28e-07	--	--	--	--	--	--
BT_Q_SG_ZJU_Unigene12771	BT_Q_ZJU_Singletons7396	0.9978	882.906	2485.41	-1.49315	down	1.86e-09	1.46e-08	gi|66529639|ref|XP_624926.1|	3e-60	PREDICTED: similar to CG10721-PA [Apis mellifera]	sp|Q68FS6|PYRD1_RAT	3e-48	Pyridine nucleotide-disulfide oxidoreductase domain-containing protein 1 OS=Rattus norvegicus GN=Pyroxd1 PE=2 SV=1
BT_Q_SG_ZJU_Unigene12775	BT_Q_ZJU_Singletons19487	0.9946	935.873	2243.56	-1.26141	down	7.3e-06	4.09e-05	--	--	--	--	--	--
BT_Q_SG_ZJU_Unigene12784	BT_Q_ZJU_Singletons108	1	379.505	1928.91	-2.34559	down	4.92e-05	0.000233302	--	--	--	--	--	--
BT_Q_SG_ZJU_Unigene12785	BT_Q_ZJU_Singletons119673	1	4228.54	107.596	5.29646	up	0	0	--	--	--	--	--	--
BT_Q_SG_ZJU_Unigene12786	BT_Q_ZJU_Singletons155010	0.9957	4858.32	64.5579	6.23372	up	0	0	--	--	--	--	--	--
BT_Q_SG_ZJU_Unigene12795	BT_Q_ZJU_Singletons4204	0.9959	1661.3	3499.83	-1.07497	down	5.25e-05	0.000247169	gi|110750170|ref|XP_623637.2|	6e-39	PREDICTED: similar to Int6 homologue CG9677-PA [Apis mellifera]	sp|Q2F5R8|EIF3E_BOMMO	1e-33	Eukaryotic translation initiation factor 3 subunit E OS=Bombyx mori GN=eIF3-S6 PE=2 SV=1
BT_Q_SG_ZJU_Unigene12796	BT_Q_ZJU_Singletons10114	0.9961	2192.86	451.654	2.27952	up	0	0	--	--	--	--	--	--
BT_Q_SG_ZJU_Unigene12800	BT_Q_ZJU_Singletons3401	1	2319.2	598.845	1.95337	up	0	0	--	--	--	--	--	--
BT_Q_SG_ZJU_Unigene12813	BT_Q_ZJU_Singletons6480	1	2001.74	742.733	1.43034	up	0	0	--	--	--	--	--	--
BT_Q_SG_ZJU_Unigene12819	BT_Q_ZJU_Cluster2605	1	3770.22	372.475	3.33943	up	0	0	--	--	--	--	--	--
BT_Q_SG_ZJU_Unigene12822	BT_Q_ZJU_Singletons1444	1	742.736	3334.39	-2.1665	down	1.09e-11	9.84e-11	gi|156553318|ref|XP_001600461.1|	3e-26	PREDICTED: similar to Mitochondrial 39S ribosomal protein L3 [Nasonia vitripennis]	sp|Q99N95|RM03_MOUSE	1e-12	39S ribosomal protein L3, mitochondrial OS=Mus musculus GN=Mrpl3 PE=2 SV=1
BT_Q_SG_ZJU_Unigene12831	BT_Q_ZJU_Singletons23279	0.9979	1728.32	437.239	1.98288	up	0	0	--	--	--	--	--	--
BT_Q_SG_ZJU_Unigene12837	BT_Q_ZJU_Singletons164759	1	1455.55	312.622	2.21907	up	0	0	--	--	--	--	--	--
BT_Q_SG_ZJU_Unigene12842	BT_Q_ZJU_Singletons5734	0.9956	615.246	3098.5	-2.33233	down	5.22e-10	4.29e-09	gi|239789980|dbj|BAH71581.1|	2e-68	ACYPI002480 [Acyrthosiphon pisum]	sp|Q9QY36|NAA10_MOUSE	7e-66	N-alpha-acetyltransferase 10, NatA catalytic subunit OS=Mus musculus GN=Naa10 PE=1 SV=1
BT_Q_SG_ZJU_Unigene12844	BT_Q_ZJU_Singletons10584	0.9949	435.951	1677.85	-1.94438	down	7.18e-08	5.18e-07	--	--	--	--	--	--
BT_Q_SG_ZJU_Unigene12847	BT_Q_ZJU_Singletons34726	0.9943	917.377	2427.82	-1.40407	down	1.06e-09	8.4e-09	gi|66504524|ref|XP_623875.1|	5e-47	PREDICTED: similar to CG11781-PA [Apis mellifera]	sp|Q9CQW0|TMM93_MOUSE	1e-30	Transmembrane protein 93 OS=Mus musculus GN=Tmem93 PE=2 SV=1
BT_Q_SG_ZJU_Unigene12849	BT_Q_ZJU_Singletons161	1	423.097	2904.41	-2.77918	down	4.18e-09	3.2e-08	gi|48117538|ref|XP_393197.1|	9e-76	PREDICTED: similar to Rpn2 CG11888-PA [Apis mellifera]	sp|Q5F418|PSMD1_CHICK	4e-68	26S proteasome non-ATPase regulatory subunit 1 OS=Gallus gallus GN=PSMD1 PE=2 SV=1
BT_Q_SG_ZJU_Unigene12856	BT_Q_ZJU_Singletons23591	1	393.002	1178.92	-1.58486	down	1.53e-05	8.1e-05	gi|193582598|ref|XP_001951649.1|	7e-36	PREDICTED: similar to integrin alpha FG-GAP repeat containing 2 [Acyrthosiphon pisum]	sp|Q91WI7|ITFG2_MOUSE	3e-20	Integrin-alpha FG-GAP repeat-containing protein 2 OS=Mus musculus GN=Itfg2 PE=2 SV=1
BT_Q_SG_ZJU_Unigene12862	BT_Q_ZJU_Singletons30164	1	2662.9	902.313	1.5613	up	0	0	--	--	--	--	--	--
BT_Q_SG_ZJU_Unigene12863	BT_Q_ZJU_Singletons29777	0.9916	1319.21	541.67	1.28419	up	5.4e-05	0.000253971	--	--	--	--	--	--
BT_Q_SG_ZJU_Unigene12865	BT_Q_ZJU_Singletons21772	0.9961	548.215	2892.04	-2.39927	down	1.02e-10	8.77e-10	gi|48095044|ref|XP_392226.1|	6e-14	PREDICTED: similar to CG11638-PA isoform 1 [Apis mellifera]	--	--	--
BT_Q_SG_ZJU_Unigene12867	BT_Q_ZJU_Singletons163994	1	637.337	2367.62	-1.89331	down	2.58e-10	2.16e-09	--	--	--	--	--	--
BT_Q_SG_ZJU_Unigene12869	BT_Q_ZJU_Singletons151586	1	884.147	2320.01	-1.39177	down	1e-05	5.42e-05	--	--	--	--	--	--
BT_Q_SG_ZJU_Unigene12873	BT_Q_ZJU_Singletons15461	1	361.26	2354.62	-2.70439	down	5.2e-10	4.28e-09	gi|110768131|ref|XP_001121361.1|	7e-39	PREDICTED: similar to CG8108-PB, isoform B, partial [Apis mellifera]	sp|Q9ULV3|CIZ1_HUMAN	3e-10	Cip1-interacting zinc finger protein OS=Homo sapiens GN=CIZ1 PE=1 SV=1
BT_Q_SG_ZJU_Unigene12880	BT_Q_ZJU_Singletons6142	1	2563.78	576.055	2.15399	up	0	0	--	--	--	--	--	--
BT_Q_SG_ZJU_Unigene12882	BT_Q_ZJU_Singletons30373	0.996	372.728	3610.63	-3.27605	down	8.19e-17	7.97e-16	--	--	--	--	--	--
BT_Q_SG_ZJU_Unigene12885	BT_Q_ZJU_Singletons29261	1	1558.96	349.577	2.15691	up	0	0	--	--	--	--	--	--
BT_Q_SG_ZJU_Unigene12896	BT_Q_ZJU_Singletons28431	1	987.488	2535.6	-1.36049	down	7.44e-10	5.97e-09	gi|112983864|ref|NP_001037390.1|	4e-69	ubiquitin-conjugating enzyme E2L [Bombyx mori] >gi|78216467|gb|ABB36655.1| ubiquitin-conjugating enzyme E2I [Bombyx mori] >gi|95102838|gb|ABF51360.1| ubiquitin-conjugating enzyme [Bombyx mori]	sp|P68037|UB2L3_MOUSE	1e-64	Ubiquitin-conjugating enzyme E2 L3 OS=Mus musculus GN=Ube2l3 PE=2 SV=1
BT_Q_SG_ZJU_Unigene12900	BT_Q_ZJU_Singletons136648	1	1881.56	594.057	1.66326	up	6e-06	3.39e-05	gi|239792364|dbj|BAH72534.1|	4e-38	ACYPI002040 [Acyrthosiphon pisum]	sp|Q29IK4|RM22_DROPS	4e-35	39S ribosomal protein L22, mitochondrial OS=Drosophila pseudoobscura pseudoobscura GN=mRpL22 PE=3 SV=2
BT_Q_SG_ZJU_Unigene12902	BT_Q_ZJU_Singletons5690	1	234.526	1206.05	-2.36247	down	4.1e-05	0.000198219	gi|195117956|ref|XP_002003511.1|	1e-31	GI22182 [Drosophila mojavensis] >gi|193914086|gb|EDW12953.1| GI22182 [Drosophila mojavensis]	sp|Q9VIM5|ARPC2_DROME	1e-31	Probable actin-related protein 2/3 complex subunit 2 OS=Drosophila melanogaster GN=Arc-p34 PE=1 SV=2
BT_Q_SG_ZJU_Unigene12904	BT_Q_ZJU_Singletons8110	0.9982	578.728	1789.12	-1.6283	down	5e-09	3.81e-08	gi|66525114|ref|XP_397399.2|	1e-62	PREDICTED: similar to Splicing factor 3A subunit 3 (Spliceosome-associated protein 61) (SAP 61) (SF3a60) [Apis mellifera]	sp|Q9D554|SF3A3_MOUSE	3e-58	Splicing factor 3A subunit 3 OS=Mus musculus GN=Sf3a3 PE=2 SV=2
BT_Q_SG_ZJU_Unigene12905	BT_Q_ZJU_Singletons154017	1	630.061	1866.38	-1.56668	down	8.76e-06	4.82e-05	gi|66517710|ref|XP_395521.2|	5e-18	PREDICTED: similar to tripeptidyl peptidase II [Apis mellifera]	sp|A5PK39|TPP2_BOVIN	2e-16	Tripeptidyl-peptidase 2 OS=Bos taurus GN=TPP2 PE=2 SV=1
BT_Q_SG_ZJU_Unigene12906	BT_Q_ZJU_Singletons16886	1	2390.01	700.281	1.77101	up	0	0	--	--	--	--	--	--
BT_Q_SG_ZJU_Unigene12911	BT_Q_ZJU_Singletons25267	1	913.185	234.022	1.96426	up	8e-05	0.000358067	--	--	--	--	--	--
BT_Q_SG_ZJU_Unigene12918	BT_Q_ZJU_Singletons151139	1	1844.82	642.971	1.52065	up	0	0	gi|114051339|ref|NP_001040374.1|	3e-49	Yipf6 protein [Bombyx mori] >gi|95102670|gb|ABF51273.1| Yipf6 protein [Bombyx mori]	sp|Q28CH8|YIPF6_XENTR	2e-39	Protein YIPF6 OS=Xenopus tropicalis GN=yipf6 PE=2 SV=1
BT_Q_SG_ZJU_Unigene12919	BT_Q_ZJU_Singletons7145	1	1025.41	179.86	2.51126	up	2e-06	1.25e-05	--	--	--	--	--	--
BT_Q_SG_ZJU_Unigene12924	BT_Q_ZJU_Singletons21902	1	776.261	3032.62	-1.96595	down	1.06e-08	7.98e-08	--	--	--	--	--	--
BT_Q_SG_ZJU_Unigene12928	BT_Q_ZJU_Singletons19270	0.9961	2593.84	791.935	1.71164	up	0	0	--	--	--	--	--	--
BT_Q_SG_ZJU_Unigene12941	BT_Q_ZJU_Singletons29015	1	1418.37	471.186	1.58987	up	4e-06	2.37e-05	--	--	--	--	--	--
BT_Q_SG_ZJU_Unigene12942	BT_Q_ZJU_Singletons33370	0.9974	1486.98	647.112	1.2003	up	3.2e-05	0.000158366	gi|114051900|ref|NP_001040188.1|	2e-58	KDEL endoplasmic reticulum protein retention receptor 2 [Bombyx mori] >gi|87248321|gb|ABD36213.1| KDEL endoplasmic reticulum protein retention receptor 2a [Bombyx mori]	sp|Q5ZKX9|ERD22_CHICK	2e-56	ER lumen protein retaining receptor 2 OS=Gallus gallus GN=KDELR2 PE=2 SV=1
BT_Q_SG_ZJU_Unigene12952	BT_Q_ZJU_Singletons162152	1	2224.15	281.338	2.98288	up	0	0	--	--	--	--	--	--
BT_Q_SG_ZJU_Unigene12954	BT_Q_ZJU_Singletons140582	1	365.762	1714.71	-2.22899	down	2.01e-05	0.000103552	--	--	--	--	--	--
BT_Q_SG_ZJU_Unigene12958	BT_Q_ZJU_Singletons29182	1	6828.75	215.724	4.98436	up	0	0	--	--	--	--	--	--
BT_Q_SG_ZJU_Unigene12964	BT_Q_ZJU_Singletons11521	1	313.092	1975.15	-2.6573	down	1.07e-06	7.03e-06	--	--	--	--	--	--
BT_Q_SG_ZJU_Unigene12968	BT_Q_ZJU_Singletons34165	0.9934	622.037	1649.01	-1.40652	down	4e-06	2.33e-05	--	--	--	--	--	--
BT_Q_SG_ZJU_Unigene12976	BT_Q_ZJU_Singletons2605	1	607.29	2618.63	-2.10835	down	9.53e-15	9.1e-14	gi|157106226|ref|XP_001649227.1|	4e-40	DEAD box ATP-dependent RNA helicase [Aedes aegypti] >gi|108879921|gb|EAT44146.1| DEAD box ATP-dependent RNA helicase [Aedes aegypti]	sp|Q9CWT6|DDX28_MOUSE	4e-24	Probable ATP-dependent RNA helicase DDX28 OS=Mus musculus GN=Ddx28 PE=2 SV=1
BT_Q_SG_ZJU_Unigene12979	BT_Q_ZJU_Singletons131820	0.9951	4527.56	1064.57	2.08846	up	0	0	--	--	--	--	--	--
BT_Q_SG_ZJU_Unigene12982	BT_Q_ZJU_Singletons147900	1	1834.97	82.2936	4.47883	up	0	0	--	--	--	--	--	--
BT_Q_SG_ZJU_Unigene12990	BT_Q_ZJU_Singletons25161	0.9982	3509.75	1565.7	1.16456	up	0	0	gi|156543886|ref|XP_001606977.1|	6e-79	PREDICTED: similar to protein phosphatase 2c [Nasonia vitripennis]	sp|O75688|PPM1B_HUMAN	8e-61	Protein phosphatase 1B OS=Homo sapiens GN=PPM1B PE=1 SV=1
BT_Q_SG_ZJU_Unigene12995	BT_Q_ZJU_Singletons7478	1	627.858	130.151	2.27025	up	6e-06	3.42e-05	--	--	--	--	--	--
BT_Q_SG_ZJU_Unigene12996	BT_Q_ZJU_Singletons31671	1	2348.19	257.425	3.18933	up	0	0	--	--	--	--	--	--
BT_Q_SG_ZJU_Unigene13001	BT_Q_ZJU_Singletons3448	1	3269.63	142.191	4.52323	up	0	0	gi|91078476|ref|XP_968270.1|	6e-36	PREDICTED: similar to AGAP004842-PB [Tribolium castaneum]	sp|Q8MKN0|COQ9_DROME	4e-28	Ubiquinone biosynthesis protein COQ9, mitochondrial OS=Drosophila melanogaster GN=Coq9 PE=1 SV=1
BT_Q_SG_ZJU_Unigene13002	BT_Q_ZJU_Singletons9048	0.9922	2798.36	1057.34	1.40414	up	0	0	--	--	--	--	--	--
BT_Q_SG_ZJU_Unigene13004	BT_Q_ZJU_Singletons23811	1	1877.05	920.376	1.02817	up	2e-05	0.000103271	--	--	--	--	--	--
BT_Q_SG_ZJU_Unigene13005	BT_Q_ZJU_Singletons4182	1	2408.4	6048.58	-1.32852	down	2.2e-09	1.71e-08	gi|110750170|ref|XP_623637.2|	1e-90	PREDICTED: similar to Int6 homologue CG9677-PA [Apis mellifera]	sp|Q1HQY6|EIF3E_AEDAE	2e-87	Eukaryotic translation initiation factor 3 subunit E OS=Aedes aegypti GN=eIF3-S6 PE=2 SV=1
BT_Q_SG_ZJU_Unigene13006	BT_Q_ZJU_Singletons31083	0.9944	1187.29	2834.56	-1.25546	down	7e-07	4.67e-06	--	--	--	--	--	--
BT_Q_SG_ZJU_Unigene13012	BT_Q_ZJU_Singletons138377	1	1385.36	240.235	2.52774	up	0	0	--	--	--	--	--	--
BT_Q_SG_ZJU_Unigene13015	BT_Q_ZJU_Singletons133691	1	3652.74	534.908	2.77162	up	0	0	--	--	--	--	--	--
BT_Q_SG_ZJU_Unigene13021	BT_Q_ZJU_Singletons151896	0.9901	6044.84	123.576	5.61223	up	0	0	--	--	--	--	--	--
BT_Q_SG_ZJU_Unigene13024	BT_Q_ZJU_Singletons24713	0.9979	638.278	1442.3	-1.17612	down	0.000135695	0.000583532	--	--	--	--	--	--
BT_Q_SG_ZJU_Unigene13029	BT_Q_ZJU_Singletons4328	1	496.508	3321.72	-2.74204	down	2.03e-27	2.03e-26	gi|239789766|dbj|BAH71485.1|	2e-24	ACYPI009551 [Acyrthosiphon pisum]	sp|Q7JZM8|RM41_DROME	9e-22	39S ribosomal protein L41, mitochondrial OS=Drosophila melanogaster GN=mRpL41 PE=2 SV=1
BT_Q_SG_ZJU_Unigene13030	BT_Q_ZJU_Singletons16099	1	381.819	1634.73	-2.09809	down	8.99e-05	0.000397941	gi|156553200|ref|XP_001599999.1|	1e-08	PREDICTED: similar to CG34117-PA [Nasonia vitripennis]	sp|Q96HJ9|CG055_HUMAN	2e-06	UPF0562 protein C7orf55 OS=Homo sapiens GN=C7orf55 PE=1 SV=2
BT_Q_SG_ZJU_Unigene13032	BT_Q_ZJU_Singletons31114	1	2096.6	434.613	2.27025	up	0	0	--	--	--	--	--	--
BT_Q_SG_ZJU_Unigene13034	BT_Q_ZJU_Singletons29262	0.9968	842.178	2091.39	-1.31227	down	3.97e-05	0.000194076	gi|48122204|ref|XP_393244.1|	5e-57	PREDICTED: similar to Mediator of RNA polymerase II transcription subunit 31 (Mediator complex subunit SOH1) [Apis mellifera]	sp|Q17DI7|MED31_AEDAE	3e-51	Mediator of RNA polymerase II transcription subunit 31 OS=Aedes aegypti GN=MED31 PE=3 SV=1
BT_Q_SG_ZJU_Unigene13035	BT_Q_ZJU_Singletons28879	1	920.859	2085.96	-1.17966	down	2.11e-07	1.48e-06	--	--	--	--	--	--
BT_Q_SG_ZJU_Unigene13037	BT_Q_ZJU_Singletons21398	0.9978	1350.73	5069.79	-1.90819	down	7.14e-24	7.12e-23	gi|193669336|ref|XP_001946901.1|	7e-56	PREDICTED: similar to NADH dehydrogenase flavoprotein 2, mitochondrial [Acyrthosiphon pisum]	sp|Q0MQI7|NDUV2_PONPY	4e-43	NADH dehydrogenase [ubiquinone] flavoprotein 2, mitochondrial OS=Pongo pygmaeus GN=NDUFV2 PE=2 SV=1
BT_Q_SG_ZJU_Unigene13046	BT_Q_ZJU_Singletons156686	1	562.441	1917.02	-1.76909	down	6.34e-07	4.26e-06	gi|66531176|ref|XP_624779.1|	4e-61	PREDICTED: similar to Mediator complex subunit 10 CG5057-PA [Apis mellifera]	sp|Q7Q5R5|MED10_ANOGA	3e-56	Mediator of RNA polymerase II transcription subunit 10 OS=Anopheles gambiae GN=MED10 PE=3 SV=2
BT_Q_SG_ZJU_Unigene13048	BT_Q_ZJU_Singletons33340	1	1658.5	488.605	1.76314	up	0	0	--	--	--	--	--	--
BT_Q_SG_ZJU_Unigene13050	BT_Q_ZJU_Singletons18151	0.9964	621.663	2548.06	-2.03519	down	1.03e-08	7.79e-08	gi|237874274|ref|NP_001153877.1|	9e-83	calpain-B [Apis mellifera]	sp|Q9VT65|CANB_DROME	2e-58	Calpain-B OS=Drosophila melanogaster GN=CalpB PE=1 SV=2
BT_Q_SG_ZJU_Unigene13058	BT_Q_ZJU_Singletons159042	1	759.011	1866.51	-1.29815	down	8.6e-05	0.000382672	gi|189239753|ref|XP_969432.2|	7e-49	PREDICTED: similar to Copia protein (Gag-int-pol protein) [Tribolium castaneum]	sp|P10978|POLX_TOBAC	3e-35	Retrovirus-related Pol polyprotein from transposon TNT 1-94 OS=Nicotiana tabacum PE=2 SV=1
BT_Q_SG_ZJU_Unigene13071	BT_Q_ZJU_Singletons155589	0.9941	920.859	324.878	1.50308	up	0.00015	0.000636507	--	--	--	--	--	--
BT_Q_SG_ZJU_Unigene13084	BT_Q_ZJU_Singletons26635	0.9905	3606.88	1236.26	1.54477	up	0	0	--	--	--	--	--	--
BT_Q_SG_ZJU_Unigene13100	BT_Q_ZJU_Singletons27034	0.9974	847.285	2089.31	-1.30211	down	5.4e-06	3.1e-05	--	--	--	--	--	--
BT_Q_SG_ZJU_Unigene13101	BT_Q_ZJU_Singletons166235	0.9977	2859.29	183.798	3.95946	up	0	0	--	--	--	--	--	--
BT_Q_SG_ZJU_Unigene13103	BT_Q_ZJU_Singletons151825	0.993	1653.65	599.888	1.46289	up	8e-06	4.46e-05	gi|291234381|ref|XP_002737127.1|	4e-11	PREDICTED: SIL1 protein-like [Saccoglossus kowalevskii]	sp|Q9EPK6|SIL1_MOUSE	2e-11	Nucleotide exchange factor SIL1 OS=Mus musculus GN=Sil1 PE=1 SV=2
BT_Q_SG_ZJU_Unigene13105	BT_Q_ZJU_Singletons21690	1	13825.5	283.079	5.60999	up	0	0	--	--	--	--	--	--
BT_Q_SG_ZJU_Unigene13110	BT_Q_ZJU_Singletons162733	0.9955	1123.2	402.98	1.47883	up	2e-06	1.24e-05	--	--	--	--	--	--
BT_Q_SG_ZJU_Unigene13111	BT_Q_ZJU_Singletons27444	0.9956	856.378	2081.11	-1.28103	down	1.04e-06	6.82e-06	gi|189239489|ref|XP_001815879.1|	1e-53	PREDICTED: similar to DMAP1 CG11132-PA [Tribolium castaneum]	sp|Q9JI44|DMAP1_MOUSE	3e-49	DNA methyltransferase 1-associated protein 1 OS=Mus musculus GN=Dmap1 PE=1 SV=1
BT_Q_SG_ZJU_Unigene13112	BT_Q_ZJU_Singletons2459	1	578.27	1812.9	-1.64849	down	8.15e-07	5.39e-06	gi|158297652|ref|XP_001237981.2|	1e-15	AGAP011458-PA [Anopheles gambiae str. PEST] >gi|157014679|gb|EAU76262.2| AGAP011458-PA [Anopheles gambiae str. PEST]	sp|Q91XW8|FKBP6_MOUSE	5e-10	Peptidyl-prolyl cis-trans isomerase FKBP6 OS=Mus musculus GN=Fkbp6 PE=2 SV=1
BT_Q_SG_ZJU_Unigene13113	BT_Q_ZJU_Singletons31362	0.9963	745.457	1604.72	-1.10613	down	2.88e-05	0.000143509	--	--	--	--	--	--
BT_Q_SG_ZJU_Unigene13117	BT_Q_ZJU_Singletons149314	0.993	2149.75	270.279	2.99165	up	0	0	gi|41946787|gb|AAH65971.1|	1e-06	Zgc:55876 protein [Danio rerio]	sp|Q9NEW6|RSP3_CAEEL	6e-06	Probable splicing factor, arginine/serine-rich 3 OS=Caenorhabditis elegans GN=rsp-3 PE=1 SV=2
BT_Q_SG_ZJU_Unigene13119	BT_Q_ZJU_Singletons3501	0.9973	2922.19	519.218	2.49264	up	0	0	--	--	--	--	--	--
BT_Q_SG_ZJU_Unigene13127	BT_Q_ZJU_Singletons33113	0.9969	2487.18	163.305	3.92887	up	0	0	--	--	--	--	--	--
BT_Q_SG_ZJU_Unigene13129	BT_Q_ZJU_Singletons16140	0.9956	344.815	1674.24	-2.27961	down	1.07e-05	5.79e-05	gi|193586979|ref|XP_001952482.1|	8e-86	PREDICTED: similar to GA14452-PA [Acyrthosiphon pisum]	sp|P32577|CSK_RAT	1e-63	Tyrosine-protein kinase CSK OS=Rattus norvegicus GN=Csk PE=1 SV=1
BT_Q_SG_ZJU_Unigene13133	BT_Q_ZJU_Singletons127205	1	1639.22	58.8119	4.80076	up	0	0	--	--	--	--	--	--
BT_Q_SG_ZJU_Unigene13137	BT_Q_ZJU_Singletons14171	0.9903	1904.45	4723.72	-1.31055	down	7.59e-13	7.01e-12	gi|66509654|ref|XP_395944.2|	3e-78	PREDICTED: similar to Annexin-B9 (Annexin-9) (Annexin IX), partial [Apis mellifera]	sp|P22464|ANXB9_DROME	3e-76	Annexin-B9 OS=Drosophila melanogaster GN=AnnIX PE=1 SV=2
BT_Q_SG_ZJU_Unigene13145	BT_Q_ZJU_Singletons18768	0.9981	757.951	1582.81	-1.06231	down	6.66e-05	0.000305907	--	--	--	--	--	--
BT_Q_SG_ZJU_Unigene13146	BT_Q_ZJU_Singletons814	0.9977	599.388	4284.08	-2.83743	down	3.95e-30	3.97e-29	gi|91079945|ref|XP_968596.1|	3e-36	PREDICTED: similar to lysosomal alpha-mannosidase (mannosidase alpha class 2b member 1) [Tribolium castaneum]	sp|Q29451|MA2B1_BOVIN	1e-17	Lysosomal alpha-mannosidase OS=Bos taurus GN=MAN2B1 PE=1 SV=3
BT_Q_SG_ZJU_Unigene13148	BT_Q_ZJU_Singletons6681	0.9982	597.721	1310.53	-1.1326	down	0.000120278	0.000522083	gi|91091508|ref|XP_969167.1|	9e-61	PREDICTED: similar to lipocalin-1 interacting membrane receptor (limr) [Tribolium castaneum]	sp|Q9D1E5|LMBRL_MOUSE	5e-37	Protein LMBR1L OS=Mus musculus GN=Lmbr1l PE=2 SV=1
BT_Q_SG_ZJU_Unigene13150	BT_Q_ZJU_Singletons123973	1	1026.53	81.8439	3.64876	up	0	0	--	--	--	--	--	--
BT_Q_SG_ZJU_Unigene13156	BT_Q_ZJU_Singletons121345	1	176.888	2559.7	-3.85507	down	8.75e-10	6.96e-09	gi|193704598|ref|XP_001943364.1|	2e-76	PREDICTED: similar to GA13696-PA [Acyrthosiphon pisum]	sp|O01479|TMOD_CAEEL	3e-39	Tropomodulin OS=Caenorhabditis elegans GN=unc-94 PE=1 SV=2
BT_Q_SG_ZJU_Unigene13157	BT_Q_ZJU_Singletons17975	1	882.68	1915.65	-1.11787	down	1.12e-06	7.28e-06	gi|189236717|ref|XP_974715.2|	7e-79	PREDICTED: similar to Histidyl-tRNA synthetase CG6335-PA [Tribolium castaneum]	sp|Q5R4R2|SYHC_PONAB	2e-78	Histidyl-tRNA synthetase, cytoplasmic OS=Pongo abelii GN=HARS PE=2 SV=1
BT_Q_SG_ZJU_Unigene13159	BT_Q_ZJU_Singletons146803	1	353.111	1323.19	-1.90583	down	0.000149496	0.000635661	--	--	--	--	--	--
BT_Q_SG_ZJU_Unigene13169	BT_Q_ZJU_Singletons29951	0.9972	439.736	2203.49	-2.32508	down	6.38e-11	5.54e-10	--	--	--	--	--	--
BT_Q_SG_ZJU_Unigene13170	BT_Q_ZJU_Singletons4537	0.9945	1202	2693.61	-1.16411	down	1.23e-08	9.21e-08	gi|239789579|dbj|BAH71405.1|	1e-09	ACYPI008449 [Acyrthosiphon pisum] >gi|239792270|dbj|BAH72495.1| ACYPI008449 [Acyrthosiphon pisum]	--	--	--
BT_Q_SG_ZJU_Unigene13173	BT_Q_ZJU_Singletons25303	0.9908	288.564	2769.44	-3.26263	down	2.13e-11	1.91e-10	gi|239790453|dbj|BAH71787.1|	1e-40	ACYPI005523 [Acyrthosiphon pisum]	sp|P28574|MAX_MOUSE	8e-33	Protein max OS=Mus musculus GN=Max PE=1 SV=1
BT_Q_SG_ZJU_Unigene13191	BT_Q_ZJU_Singletons23126	0.9964	967.739	2723.17	-1.4926	down	1.46e-06	9.37e-06	--	--	--	--	--	--
BT_Q_SG_ZJU_Unigene13192	BT_Q_ZJU_Singletons119721	1	539.814	32.2789	4.0638	up	2.8e-05	0.000140236	--	--	--	--	--	--
BT_Q_SG_ZJU_Unigene13193	BT_Q_ZJU_Singletons10234	1	2199.41	487.385	2.17398	up	0	0	gi|94468856|gb|ABF18277.1|	5e-24	DNAJ chaperone [Aedes aegypti]	sp|Q04960|DNJH_CUCSA	1e-11	DnaJ protein homolog OS=Cucumis sativus GN=DNAJ1 PE=2 SV=1
BT_Q_SG_ZJU_Unigene13196	BT_Q_ZJU_Singletons152139	1	3398.7	209.388	4.02073	up	0	0	--	--	--	--	--	--
BT_Q_SG_ZJU_Unigene13201	BT_Q_ZJU_Singletons26578	0.9984	752.391	1576.11	-1.06682	down	1.11e-05	5.99e-05	--	--	--	--	--	--
BT_Q_SG_ZJU_Unigene13205	BT_Q_ZJU_Singletons166312	1	1287.86	564.734	1.18933	up	4e-06	2.37e-05	gi|194764845|ref|XP_001964538.1|	1e-12	GF22998 [Drosophila ananassae] >gi|190614810|gb|EDV30334.1| GF22998 [Drosophila ananassae]	sp|Q9NQX1|PRDM5_HUMAN	1e-11	PR domain zinc finger protein 5 OS=Homo sapiens GN=PRDM5 PE=1 SV=2
BT_Q_SG_ZJU_Unigene13209	BT_Q_ZJU_Singletons20968	0.992	1969.29	691.633	1.5096	up	0	0	gi|73967602|ref|XP_858138.1|	4e-18	PREDICTED: similar to bromodomain containing 3 isoform 6 [Canis familiaris]	sp|Q8K2F0|BRD3_MOUSE	3e-18	Bromodomain-containing protein 3 OS=Mus musculus GN=Brd3 PE=1 SV=2
BT_Q_SG_ZJU_Unigene13210	BT_Q_ZJU_Singletons161648	1	2370.85	316.894	2.90333	up	0	0	--	--	--	--	--	--
BT_Q_SG_ZJU_Unigene13215	BT_Q_ZJU_Singletons152412	0.9968	508.266	2911.6	-2.51816	down	2.64e-13	2.47e-12	gi|158298472|ref|XP_318643.3|	8e-52	AGAP009613-PA [Anopheles gambiae str. PEST] >gi|157013898|gb|EAA14573.3| AGAP009613-PA [Anopheles gambiae str. PEST]	sp|Q6DDY9|RT07_XENLA	2e-41	28S ribosomal protein S7, mitochondrial OS=Xenopus laevis GN=mrps7 PE=2 SV=1
BT_Q_SG_ZJU_Unigene13217	BT_Q_ZJU_Singletons142371	1	2143.58	380.65	2.49348	up	0	0	--	--	--	--	--	--
BT_Q_SG_ZJU_Unigene13219	BT_Q_ZJU_Singletons1214	1	795.384	2598.57	-1.70799	down	6.79e-11	5.88e-10	gi|239792455|dbj|BAH72569.1|	8e-13	ACYPI002769 [Acyrthosiphon pisum]	sp|O76387|PTH2_CAEEL	2e-09	Probable peptidyl-tRNA hydrolase 2 OS=Caenorhabditis elegans GN=C24G6.8 PE=2 SV=1
BT_Q_SG_ZJU_Unigene13222	BT_Q_ZJU_Singletons158207	1	544.144	1611.88	-1.56668	down	8.76e-06	4.82e-05	gi|156547875|ref|XP_001607475.1|	1e-120	PREDICTED: similar to cop9 signalosome complex subunit [Nasonia vitripennis]	sp|Q94899|CSN2_DROME	2e-116	COP9 signalosome complex subunit 2 OS=Drosophila melanogaster GN=alien PE=1 SV=2
BT_Q_SG_ZJU_Unigene13227	BT_Q_ZJU_Singletons17861	1	598.558	2428.33	-2.0204	down	6.2e-10	5.04e-09	gi|270011090|gb|EFA07538.1|	2e-65	Fas (TNFRSF6) associated factor 1 [Tribolium castaneum]	sp|Q9UNN5|FAF1_HUMAN	3e-44	FAS-associated factor 1 OS=Homo sapiens GN=FAF1 PE=1 SV=2
BT_Q_SG_ZJU_Unigene13236	BT_Q_ZJU_Singletons28823	1	753.74	145.614	2.37192	up	1.4e-05	7.41e-05	--	--	--	--	--	--
BT_Q_SG_ZJU_Unigene13251	BT_Q_ZJU_Singletons25531	0.9949	635.72	3031.6	-2.25362	down	9.65e-23	9.57e-22	gi|194859128|ref|XP_001969318.1|	6e-96	GG24022 [Drosophila erecta] >gi|190661185|gb|EDV58377.1| GG24022 [Drosophila erecta]	sp|P40939|ECHA_HUMAN	1e-80	Trifunctional enzyme subunit alpha, mitochondrial OS=Homo sapiens GN=HADHA PE=1 SV=2
BT_Q_SG_ZJU_Unigene13259	BT_Q_ZJU_Singletons25212	0.9953	694.947	2401.46	-1.78894	down	1.37e-10	1.17e-09	gi|58375839|ref|XP_307644.2|	2e-77	Anopheles gambiae str. PEST AGAP012513-PA [Anopheles gambiae str. PEST] >gi|55246524|gb|EAA03441.3| AGAP012513-PA [Anopheles gambiae str. PEST]	sp|Q6PAY8|HSDL2_XENLA	5e-64	Hydroxysteroid dehydrogenase-like protein 2 OS=Xenopus laevis GN=hsdl2 PE=2 SV=1
BT_Q_SG_ZJU_Unigene13260	BT_Q_ZJU_Singletons12222	1	1173.08	2351.11	-1.00304	down	7.88e-05	0.000353418	gi|66515169|ref|XP_395013.2|	1e-66	PREDICTED: similar to GTP-binding protein CG2522-PA isoform 1 [Apis mellifera]	sp|Q9U5L1|SRPR_DROME	2e-61	Signal recognition particle receptor subunit alpha homolog OS=Drosophila melanogaster GN=Gtp-bp PE=1 SV=2
BT_Q_SG_ZJU_Unigene13261	BT_Q_ZJU_Singletons166690	1	2671.04	186.107	3.8432	up	0	0	gi|66357002|ref|XP_625679.1|	4e-06	Low complexity protein with large Glu repeat [Cryptosporidium parvum Iowa II] >gi|46226679|gb|EAK87658.1| Low complexity protein with large Glu repeat [Cryptosporidium parvum Iowa II]	--	--	--
BT_Q_SG_ZJU_Unigene13269	BT_Q_ZJU_Singletons28148	0.9933	472.79	2286.82	-2.27407	down	2.01e-09	1.57e-08	--	--	--	--	--	--
BT_Q_SG_ZJU_Unigene13274	BT_Q_ZJU_Singletons167398	0.9985	1162.13	307.942	1.91604	up	0	0	gi|239789563|dbj|BAH71397.1|	2e-71	ACYPI005456 [Acyrthosiphon pisum]	sp|Q9VTZ6|PMM_DROME	7e-63	Probable phosphomannomutase OS=Drosophila melanogaster GN=CG10688 PE=2 SV=1
BT_Q_SG_ZJU_Unigene13303	BT_Q_ZJU_Singletons146718	1	2177.52	492.679	2.14397	up	0	0	--	--	--	--	--	--
BT_Q_SG_ZJU_Unigene13305	BT_Q_ZJU_Singletons8676	0.9971	823.926	2206.11	-1.42091	down	3.02e-06	1.82e-05	--	--	--	--	--	--
BT_Q_SG_ZJU_Unigene13309	BT_Q_ZJU_Singletons15179	0.9924	662.128	1713.81	-1.37202	down	1.82e-08	1.35e-07	--	--	--	--	--	--
BT_Q_SG_ZJU_Unigene13320	BT_Q_ZJU_Singletons7165	0.9983	626.184	1575.75	-1.33138	down	5.44e-07	3.68e-06	gi|156548662|ref|XP_001602104.1|	1e-71	PREDICTED: similar to membrane-associated protein gex-3 [Nasonia vitripennis]	sp|P55162|HEM_DROME	3e-66	Membrane-associated protein Hem OS=Drosophila melanogaster GN=Hem PE=2 SV=1
BT_Q_SG_ZJU_Unigene13322	BT_Q_ZJU_Singletons140429	1	1739.4	64.0061	4.76424	up	0	0	gi|112983130|ref|NP_001037598.1|	8e-06	nuclear cap-binding protein subunit 2 [Bombyx mori] >gi|122119432|sp|Q1HE01.1|NCBP2_BOMMO RecName: Full=Nuclear cap-binding protein subunit 2; AltName: Full=20 kDa nuclear cap-binding protein; AltName: Full=NCBP 20 kDa subunit; Short=CBP20 >gi|95115190|gb|ABF55961.1| Cbp20 [Bombyx mori]	sp|Q1HE01|NCBP2_BOMMO	2e-06	Nuclear cap-binding protein subunit 2 OS=Bombyx mori PE=2 SV=1
BT_Q_SG_ZJU_Unigene13335	BT_Q_ZJU_Singletons5898	0.9972	2557.65	247.866	3.36719	up	0	0	--	--	--	--	--	--
BT_Q_SG_ZJU_Unigene13340	BT_Q_ZJU_Singletons164363	0.9934	564.592	1583.68	-1.488	down	0.000138928	0.000594977	--	--	--	sp|P89202|RDRP_SHMV	2e-31	Replicase large subunit OS=Sunn-hemp mosaic virus PE=2 SV=2
BT_Q_SG_ZJU_Unigene13348	BT_Q_ZJU_Singletons166851	1	1808	472	1.93753	up	0	0	gi|91076512|ref|XP_973316.1|	4e-50	PREDICTED: similar to CG9849 CG9849-PA [Tribolium castaneum]	sp|Q9W1W9|PAP21_DROME	3e-41	PAP21-like protein OS=Drosophila melanogaster GN=CG9849 PE=2 SV=1
BT_Q_SG_ZJU_Unigene13349	BT_Q_ZJU_Singletons9027	1	1046.96	2504.19	-1.25813	down	1.28e-05	6.83e-05	gi|48098273|ref|XP_392037.1|	1e-27	PREDICTED: similar to mitochondrial ribosomal protein S34 CG13037-PA [Apis mellifera]	sp|P82929|RT34_BOVIN	2e-09	28S ribosomal protein S34, mitochondrial OS=Bos taurus GN=MRPS34 PE=1 SV=2
BT_Q_SG_ZJU_Unigene13350	BT_Q_ZJU_Singletons26267	0.993	1419.84	3004.19	-1.08125	down	4.98e-07	3.37e-06	--	--	--	--	--	--
BT_Q_SG_ZJU_Unigene13351	BT_Q_ZJU_Singletons17118	1	462.697	4085.59	-3.1424	down	6.14e-15	5.89e-14	--	--	--	--	--	--
BT_Q_SG_ZJU_Unigene13353	BT_Q_ZJU_Singletons8978	0.9918	1086.24	508.163	1.09598	up	0.000174	0.000725784	--	--	--	--	--	--
BT_Q_SG_ZJU_Unigene13357	BT_Q_ZJU_Singletons19189	1	920.859	2327.38	-1.33765	down	1.55e-08	1.16e-07	gi|91084695|ref|XP_969196.1|	9e-83	PREDICTED: similar to Ufm1-conjugating enzyme 1 (Ubiquitin-fold modifier-conjugating enzyme 1) [Tribolium castaneum]	sp|B0WVC4|UFC1_CULQU	5e-82	Ubiquitin-fold modifier-conjugating enzyme 1 OS=Culex quinquefasciatus GN=CPIJ011320 PE=3 SV=1
BT_Q_SG_ZJU_Unigene13358	BT_Q_ZJU_Singletons16073	1	716.223	2777.68	-1.9554	down	7.51e-10	6.02e-09	gi|110762464|ref|XP_397129.3|	3e-56	PREDICTED: similar to RNA polymerase III 80 kDa subunit RPC5 [Apis mellifera]	sp|Q9CZT4|RPC5_MOUSE	5e-42	DNA-directed RNA polymerase III subunit RPC5 OS=Mus musculus GN=Polr3e PE=1 SV=2
BT_Q_SG_ZJU_Unigene13366	BT_Q_ZJU_Singletons1585	0.9972	617.364	1677.05	-1.44173	down	3.12e-05	0.000154806	gi|237681151|ref|NP_001153722.1|	2e-18	SAP domain containing ribonucleoprotein [Tribolium castaneum]	sp|Q5R4V4|SARNP_PONAB	9e-14	SAP domain-containing ribonucleoprotein OS=Pongo abelii GN=SARNP PE=2 SV=3
BT_Q_SG_ZJU_Unigene13373	BT_Q_ZJU_Singletons156616	1	1193.99	153.371	2.9607	up	0	0	--	--	--	--	--	--
BT_Q_SG_ZJU_Unigene13377	BT_Q_ZJU_Singletons167	0.9953	593.539	3584.65	-2.59442	down	1.07e-11	9.72e-11	--	--	--	--	--	--
BT_Q_SG_ZJU_Unigene13378	BT_Q_ZJU_Singletons130711	1	467.301	1695.21	-1.85904	down	0.000245976	0.000994163	gi|289743251|gb|ADD20373.1|	1e-106	WD40 repeat-containing protein [Glossina morsitans morsitans]	sp|Q9V3J8|WDS_DROME	2e-103	Protein will die slowly OS=Drosophila melanogaster GN=wds PE=2 SV=1
BT_Q_SG_ZJU_Unigene13385	BT_Q_ZJU_Singletons2037	0.9923	967.079	3513.05	-1.86102	down	6.34e-10	5.14e-09	gi|193596505|ref|XP_001945593.1|	1e-100	PREDICTED: similar to 26S protease regulatory subunit 6B [Acyrthosiphon pisum]	sp|P46507|PRS6B_MANSE	4e-98	26S protease regulatory subunit 6B OS=Manduca sexta PE=2 SV=1
BT_Q_SG_ZJU_Unigene13386	BT_Q_ZJU_Singletons13203	1	1301.26	165.054	2.97891	up	0	0	--	--	--	--	--	--
BT_Q_SG_ZJU_Unigene13390	BT_Q_ZJU_Singletons26455	0.9945	648.671	2699.66	-2.05722	down	8.87e-12	8.09e-11	gi|170043242|ref|XP_001849304.1|	1e-105	aldehyde dehydrogenase, mitochondrial [Culex quinquefasciatus] >gi|167866629|gb|EDS30012.1| aldehyde dehydrogenase, mitochondrial [Culex quinquefasciatus]	sp|Q5RF00|ALDH2_PONAB	7e-97	Aldehyde dehydrogenase, mitochondrial OS=Pongo abelii GN=ALDH2 PE=2 SV=1
BT_Q_SG_ZJU_Unigene13392	BT_Q_ZJU_Singletons157361	0.9927	917.486	137.156	2.74187	up	0	0	gi|187177323|ref|NP_001119639.1|	9e-12	Sec61 alpha 1 subunit [Acyrthosiphon pisum] >gi|52630957|gb|AAU84942.1| probable transport protein Sec61 alpha subunit [Toxoptera citricida]	sp|Q25147|SC61A_HALRO	4e-11	Protein transport protein Sec61 subunit alpha OS=Halocynthia roretzi PE=2 SV=1
BT_Q_SG_ZJU_Unigene13394	BT_Q_ZJU_Singletons161270	0.9962	717.004	1950.78	-1.444	down	0.000121109	0.000524596	gi|156545673|ref|XP_001604259.1|	6e-45	PREDICTED: similar to nucleolar complex protein [Nasonia vitripennis]	sp|Q6NU91|NOC4B_XENLA	2e-24	Nucleolar complex protein 4 homolog B OS=Xenopus laevis GN=noc4l-b PE=2 SV=1
BT_Q_SG_ZJU_Unigene13397	BT_Q_ZJU_Singletons32017	1	1200.65	364.495	1.71984	up	2e-06	1.27e-05	gi|114050747|ref|NP_001040106.1|	8e-29	coiled-coil domain containing 25 protein [Bombyx mori] >gi|87248079|gb|ABD36092.1| coiled-coil domain containing 25 protein [Bombyx mori]	sp|Q86WR0|CCD25_HUMAN	2e-23	Coiled-coil domain-containing protein 25 OS=Homo sapiens GN=CCDC25 PE=1 SV=2
BT_Q_SG_ZJU_Unigene13400	BT_Q_ZJU_Singletons30069	0.9955	987.227	244.564	2.01317	up	0	0	gi|195427701|ref|XP_002061915.1|	2e-11	GK17254 [Drosophila willistoni] >gi|194158000|gb|EDW72901.1| GK17254 [Drosophila willistoni]	sp|Q54J55|MYBX_DICDI	2e-09	Myb-like protein X OS=Dictyostelium discoideum GN=mybX PE=3 SV=1
BT_Q_SG_ZJU_Unigene13403	BT_Q_ZJU_Singletons27429	0.9912	1423.15	2865.92	-1.00991	down	3.78e-05	0.000184848	gi|195453282|ref|XP_002073719.1|	7e-47	GK12989 [Drosophila willistoni] >gi|194169804|gb|EDW84705.1| GK12989 [Drosophila willistoni]	sp|Q9VCC3|RT24_DROME	4e-46	28S ribosomal protein S24, mitochondrial OS=Drosophila melanogaster GN=mRpS24 PE=3 SV=1
BT_Q_SG_ZJU_Unigene13407	BT_Q_ZJU_Singletons148612	1	2365.08	552.225	2.09856	up	0	0	--	--	--	--	--	--
BT_Q_SG_ZJU_Unigene13408	BT_Q_ZJU_Singletons24837	1	574.481	2908.46	-2.33993	down	4.29e-13	3.99e-12	gi|193620169|ref|XP_001943026.1|	1e-106	PREDICTED: similar to AGAP004078-PA [Acyrthosiphon pisum]	sp|Q9WUL0|TOP1_RAT	4e-95	DNA topoisomerase 1 OS=Rattus norvegicus GN=Top1 PE=2 SV=1
BT_Q_SG_ZJU_Unigene13421	BT_Q_ZJU_Singletons132473	1	683.939	127.235	2.42637	up	0.000184	0.000763673	gi|195492387|ref|XP_002093968.1|	6e-06	GE20460 [Drosophila yakuba] >gi|194180069|gb|EDW93680.1| GE20460 [Drosophila yakuba]	--	--	--
BT_Q_SG_ZJU_Unigene13423	BT_Q_ZJU_Singletons20642	0.9958	690.644	3807.29	-2.46275	down	3.6e-25	3.6e-24	--	--	--	--	--	--
BT_Q_SG_ZJU_Unigene13424	BT_Q_ZJU_Singletons28393	1	1446.63	463.411	1.64233	up	2e-06	1.26e-05	--	--	--	--	--	--
BT_Q_SG_ZJU_Unigene13425	BT_Q_ZJU_Singletons155320	1	1493.21	213.14	2.80854	up	0	0	--	--	--	--	--	--
BT_Q_SG_ZJU_Unigene13426	BT_Q_ZJU_Singletons12398	0.9952	1733.82	492.837	1.81477	up	0	0	--	--	--	--	--	--
BT_Q_SG_ZJU_Unigene13430	BT_Q_ZJU_Singletons19909	0.9977	1077.15	2902.74	-1.43019	down	8.52e-10	6.8e-09	gi|193594169|ref|XP_001945421.1|	1e-40	PREDICTED: similar to AGAP011883-PA [Acyrthosiphon pisum]	sp|Q8CI95|OSB11_MOUSE	2e-34	Oxysterol-binding protein-related protein 11 OS=Mus musculus GN=Osbpl11 PE=1 SV=2
BT_Q_SG_ZJU_Unigene13438	BT_Q_ZJU_Singletons123723	1	1183.2	152.387	2.95688	up	0	0	gi|170043858|ref|XP_001849586.1|	5e-49	26S proteasome non-ATPase regulatory subunit 14 [Culex quinquefasciatus] >gi|167867149|gb|EDS30532.1| 26S proteasome non-ATPase regulatory subunit 14 [Culex quinquefasciatus]	sp|Q9V3H2|PSDE_DROME	4e-48	26S proteasome non-ATPase regulatory subunit 14 OS=Drosophila melanogaster GN=Rpn11 PE=1 SV=1
BT_Q_SG_ZJU_Unigene13443	BT_Q_ZJU_Singletons107440	1	511.588	2386.11	-2.22161	down	2.2e-05	0.000112784	gi|194763467|ref|XP_001963854.1|	6e-95	GF21238 [Drosophila ananassae] >gi|190618779|gb|EDV34303.1| GF21238 [Drosophila ananassae]	sp|Q27580|SAHH_DROME	6e-94	Adenosylhomocysteinase OS=Drosophila melanogaster GN=Ahcy13 PE=1 SV=2
BT_Q_SG_ZJU_Unigene13450	BT_Q_ZJU_Singletons25445	0.9948	1694.57	4472.96	-1.40031	down	1.21e-12	1.12e-11	gi|195110857|ref|XP_001999996.1|	3e-15	GI24842 [Drosophila mojavensis] >gi|193916590|gb|EDW15457.1| GI24842 [Drosophila mojavensis]	sp|Q9VFJ2|RM11_DROME	2e-13	39S ribosomal protein L11, mitochondrial OS=Drosophila melanogaster GN=mRpL11 PE=1 SV=1
BT_Q_SG_ZJU_Unigene13453	BT_Q_ZJU_Singletons7281	1	799.384	2342.22	-1.55091	down	2.59e-05	0.0001318	--	--	--	--	--	--
BT_Q_SG_ZJU_Unigene13457	BT_Q_ZJU_Singletons161418	1	1236.82	426.84	1.53487	up	0	0	--	--	--	--	--	--
BT_Q_SG_ZJU_Unigene13465	BT_Q_ZJU_Singletons162719	1	2572.14	201.538	3.67385	up	0	0	--	--	--	--	--	--
BT_Q_SG_ZJU_Unigene13468	BT_Q_ZJU_Singletons7240	0.9967	926.917	3374.85	-1.86431	down	4.55e-11	4.01e-10	gi|189236794|ref|XP_969772.2|	4e-44	PREDICTED: similar to eukaryotic translation initiation factor 4 gamma, 2 [Tribolium castaneum]	sp|Q62448|IF4G2_MOUSE	4e-43	Eukaryotic translation initiation factor 4 gamma 2 OS=Mus musculus GN=Eif4g2 PE=1 SV=2
BT_Q_SG_ZJU_Unigene13474	BT_Q_ZJU_Singletons152126	1	1283.16	135.042	3.24822	up	0	0	--	--	--	--	--	--
BT_Q_SG_ZJU_Unigene13475	BT_Q_ZJU_Singletons17322	1	881.219	2126.35	-1.27081	down	7.78e-05	0.000349309	gi|110765021|ref|XP_395589.3|	3e-90	PREDICTED: similar to Ubiquitin conjugating enzyme 2 CG6720-PA, isoform A isoform 1 [Apis mellifera]	sp|P52485|UBCD2_DROME	5e-87	Ubiquitin-conjugating enzyme E2-24 kDa OS=Drosophila melanogaster GN=UbcD2 PE=1 SV=1
BT_Q_SG_ZJU_Unigene13480	BT_Q_ZJU_Singletons133120	1	602.1	99.0095	2.60436	up	0.000202	0.000829295	--	--	--	--	--	--
BT_Q_SG_ZJU_Unigene13482	BT_Q_ZJU_Singletons30305	1	1263.6	2736.91	-1.11501	down	7.35e-10	5.91e-09	gi|23598411|gb|AAN35175.1|	8e-37	glycylpeptide N-tetradecanoyl transferase [Euprymna scolopes]	sp|O60551|NMT2_HUMAN	5e-34	Glycylpeptide N-tetradecanoyltransferase 2 OS=Homo sapiens GN=NMT2 PE=1 SV=1
BT_Q_SG_ZJU_Unigene13493	BT_Q_ZJU_Singletons36040	1	2439.1	259.878	3.23045	up	0	0	gi|193631925|ref|XP_001947236.1|	2e-91	PREDICTED: similar to subtilisin-related protease SPC3 [Acyrthosiphon pisum]	sp|P41413|PCSK5_RAT	6e-80	Proprotein convertase subtilisin/kexin type 5 (Fragment) OS=Rattus norvegicus GN=Pcsk5 PE=2 SV=2
BT_Q_SG_ZJU_Unigene13494	BT_Q_ZJU_Singletons110257	1	697.976	2814.23	-2.01149	down	9.17e-06	5.02e-05	--	--	--	--	--	--
BT_Q_SG_ZJU_Unigene13497	BT_Q_ZJU_Singletons2197	0.9971	1079.63	2469.34	-1.19359	down	1.12e-05	6.04e-05	gi|91085959|ref|XP_971351.1|	1e-53	PREDICTED: similar to lethal (1) G0004 CG11738-PA [Tribolium castaneum]	sp|Q29IG6|PNO1_DROPS	6e-53	RNA-binding protein pno1 OS=Drosophila pseudoobscura pseudoobscura GN=l(1)G0004 PE=3 SV=1
BT_Q_SG_ZJU_Unigene13498	BT_Q_ZJU_Singletons16741	0.9968	345.685	2090.7	-2.59645	down	2.21e-10	1.86e-09	--	--	--	--	--	--
BT_Q_SG_ZJU_Unigene13504	BT_Q_ZJU_Singletons2383	0.995	426.239	1899.98	-2.15625	down	6.01e-10	4.9e-09	--	--	--	--	--	--
BT_Q_SG_ZJU_Unigene13510	BT_Q_ZJU_Singletons24154	1	724.111	2065.99	-1.51255	down	4.56e-08	3.33e-07	--	--	--	--	--	--
BT_Q_SG_ZJU_Unigene13513	BT_Q_ZJU_Singletons18688	1	1093.68	543.701	1.0083	up	2.2e-05	0.000112899	--	--	--	--	--	--
BT_Q_SG_ZJU_Unigene13518	BT_Q_ZJU_Singletons16748	1	685.218	2445.81	-1.83568	down	5.03e-08	3.67e-07	gi|193704745|ref|XP_001945698.1|	1e-112	PREDICTED: similar to CG6750 CG6750-PA [Acyrthosiphon pisum]	sp|Q7SXW4|TM111_DANRE	1e-100	Transmembrane protein 111 OS=Danio rerio GN=tmem111 PE=2 SV=1
BT_Q_SG_ZJU_Unigene13519	BT_Q_ZJU_Singletons147033	1	2278.09	188.615	3.59431	up	0	0	--	--	--	--	--	--
BT_Q_SG_ZJU_Unigene13535	BT_Q_ZJU_Singletons27766	1	677.828	1972.54	-1.54107	down	2.19e-08	1.62e-07	gi|91090592|ref|XP_972768.1|	3e-84	PREDICTED: similar to transcription initiation factor RRN3 [Tribolium castaneum]	sp|B2RS91|RRN3_MOUSE	4e-69	RNA polymerase I-specific transcription initiation factor RRN3 OS=Mus musculus GN=Rrn3 PE=1 SV=1
BT_Q_SG_ZJU_Unigene13538	BT_Q_ZJU_Singletons6848	0.9968	1046.96	2975.21	-1.50678	down	5.27e-08	3.84e-07	--	--	--	--	--	--
BT_Q_SG_ZJU_Unigene13543	BT_Q_ZJU_Singletons12170	0.9969	867.024	2171.73	-1.3247	down	1.84e-05	9.58e-05	gi|221117333|ref|XP_002159342.1|	4e-50	PREDICTED: similar to RNA exonuclease 4 [Hydra magnipapillata]	sp|Q91560|REXO4_XENLA	1e-47	RNA exonuclease 4 OS=Xenopus laevis GN=rexo4 PE=2 SV=2
BT_Q_SG_ZJU_Unigene13549	BT_Q_ZJU_Singletons16779	1	851.505	3548.52	-2.05913	down	2.23e-10	1.88e-09	gi|156542482|ref|XP_001600090.1|	1e-137	PREDICTED: similar to dendritic cell protein [Nasonia vitripennis]	sp|Q17D30|EIF3M_AEDAE	5e-130	Eukaryotic translation initiation factor 3 subunit M OS=Aedes aegypti GN=AAEL004347 PE=3 SV=1
BT_Q_SG_ZJU_Unigene13551	BT_Q_ZJU_Singletons4454	0.9985	476.548	1496.03	-1.65045	down	2.72e-09	2.1e-08	--	--	--	--	--	--
BT_Q_SG_ZJU_Unigene13553	BT_Q_ZJU_Singletons111557	1	492.283	2260.74	-2.19924	down	2.87e-05	0.000143186	gi|193657351|ref|XP_001948153.1|	1e-08	PREDICTED: similar to activating transcription factor [Acyrthosiphon pisum]	sp|Q75JC9|Y8484_DICDI	9e-06	Uncharacterized protein DDB_G0271670 OS=Dictyostelium discoideum GN=DDB_G0271670 PE=4 SV=1
BT_Q_SG_ZJU_Unigene13554	BT_Q_ZJU_Singletons2027	0.9941	1393.58	505.544	1.46289	up	8e-06	4.46e-05	gi|48104167|ref|XP_392921.1|	3e-60	PREDICTED: similar to Nuclear transport factor-2 CG1740-PA [Apis mellifera]	sp|Q21735|NTF2_CAEEL	7e-27	Probable nuclear transport factor 2 OS=Caenorhabditis elegans GN=ran-4 PE=2 SV=1
BT_Q_SG_ZJU_Unigene13572	BT_Q_ZJU_Singletons2229	0.9915	794.314	3253.55	-2.03424	down	1.16e-17	1.14e-16	gi|225382096|gb|ACN89260.1|	1e-82	protein disulfide isomerase [Litopenaeus vannamei]	sp|P54399|PDI_DROME	3e-78	Protein disulfide-isomerase OS=Drosophila melanogaster GN=Pdi PE=2 SV=1
BT_Q_SG_ZJU_Unigene13578	BT_Q_ZJU_Singletons25790	0.9961	2889.37	175.517	4.04108	up	0	0	gi|193654837|ref|XP_001951546.1|	5e-52	PREDICTED: similar to retinol dehydrogenase 11 [Acyrthosiphon pisum]	sp|Q8TC12|RDH11_HUMAN	3e-47	Retinol dehydrogenase 11 OS=Homo sapiens GN=RDH11 PE=1 SV=2
BT_Q_SG_ZJU_Unigene13581	BT_Q_ZJU_Singletons155275	1	931.821	284.17	1.7133	up	2.6e-05	0.000131803	--	--	--	--	--	--
BT_Q_SG_ZJU_Unigene13582	BT_Q_ZJU_Singletons157993	1	629.541	1616.2	-1.36023	down	5.84e-05	0.000272731	gi|110762794|ref|XP_623835.2|	1e-115	PREDICTED: similar to CG11596-PA, isoform A [Apis mellifera]	sp|Q8N4J0|CI041_HUMAN	4e-93	UPF0586 protein C9orf41 OS=Homo sapiens GN=C9orf41 PE=1 SV=1
BT_Q_SG_ZJU_Unigene13583	BT_Q_ZJU_Singletons21129	1	451.575	2529.24	-2.48567	down	3.94e-08	2.9e-07	--	--	--	--	--	--
BT_Q_SG_ZJU_Unigene13588	BT_Q_ZJU_Singletons16492	0.9963	860.143	2228.78	-1.37361	down	4.74e-05	0.000225924	--	--	--	--	--	--
BT_Q_SG_ZJU_Unigene13589	BT_Q_ZJU_Singletons21739	1	1684.87	837.296	1.00883	up	0	0	gi|193575637|ref|XP_001944013.1|	2e-33	PREDICTED: similar to F57G4.9 [Acyrthosiphon pisum]	sp|Q96MB7|HARB1_HUMAN	3e-21	Putative nuclease HARBI1 OS=Homo sapiens GN=HARBI1 PE=1 SV=1
BT_Q_SG_ZJU_Unigene13603	BT_Q_ZJU_Singletons11896	1	4111.31	477.5	3.10602	up	0	0	--	--	--	--	--	--
BT_Q_SG_ZJU_Unigene13605	BT_Q_ZJU_Singletons9919	0.9961	2022.44	923.165	1.13143	up	0	0	--	--	--	--	--	--
BT_Q_SG_ZJU_Unigene13609	BT_Q_ZJU_Singletons7449	1	3646.05	1082.1	1.7525	up	0	0	--	--	--	--	--	--
BT_Q_SG_ZJU_Unigene13610	BT_Q_ZJU_Singletons118963	1	271.467	2002.04	-2.88262	down	2.32e-06	1.41e-05	gi|110764536|ref|XP_396097.3|	1e-100	PREDICTED: similar to CG16865-PA [Apis mellifera]	sp|Q3T197|CX056_BOVIN	5e-76	UPF0428 protein CXorf56 homolog OS=Bos taurus PE=2 SV=1
BT_Q_SG_ZJU_Unigene13611	BT_Q_ZJU_Singletons33938	0.9951	1837.21	746.125	1.30003	up	0	0	--	--	--	--	--	--
BT_Q_SG_ZJU_Unigene13612	BT_Q_ZJU_Singletons8081	1	1728.53	378.336	2.1918	up	0	0	--	--	--	--	--	--
