# Supplementary material for: Transcriptomic Analysis of the Salivary Glands of an Invasive Whitefly
Source: PLoS One. 2012 Jun 20;7(6):e39303. doi: 10.1371/journal.pone.0039303 (PMC3379992; doi:10.1371/journal.pone.0039303)
Supplement: Table S7 — Gene expression data verified by qPCR. Twenty unigenes were selected for validation of expression level using qPCR. (XLS) [file pone.0039303.s008.xls]

## Sheet: Sheet1
Gene ID	log2 Ratio (RPKM analysis)	log2 Ratio (qPCR)(mean±SE)	Concordant
BT_Q_SG_ZJU_Unigene496	3.28619	4.43±0.40	Yes
BT_Q_SG_ZJU_Unigene1123	2.04853	1.53±0.15	Yes
BT_Q_SG_ZJU_Unigene1532	-2.55	-1.19±0.48	Yes
BT_Q_SG_ZJU_Unigene2647	-2.84	-1.66±0.18	Yes
BT_Q_SG_ZJU_Unigene5202	-2.78	-1.88±0.24	Yes
BT_Q_SG_ZJU_Unigene5624	4.54184	9.02±0.70	Yes
BT_Q_SG_ZJU_Unigene6526	2.07399	2.68±0.11	Yes
BT_Q_SG_ZJU_Unigene7160	-2.72	-1.17±0.04	Yes
BT_Q_SG_ZJU_Unigene8460	1.47883	2.33±0.13	Yes
BT_Q_SG_ZJU_Unigene9390	5.19765	9.45±0.37	Yes
BT_Q_SG_ZJU_Unigene9674	-2.66	0.72±0.09
BT_Q_SG_ZJU_Unigene10715	-2.61	-0.50±0.06	Yes
BT_Q_SG_ZJU_Unigene11524	-2.55	-1.27±0.06	Yes
BT_Q_SG_ZJU_Unigene11747	3.2753	7.17±0.78	Yes
BT_Q_SG_ZJU_Unigene12156	1.60436	4.08±0.18	Yes
BT_Q_SG_ZJU_Unigene12741	2.72103	2.30±0.34	Yes
BT_Q_SG_ZJU_Unigene12849	-2.78	-0.51±0.11	Yes
BT_Q_SG_ZJU_Unigene12882	-3.28	-0.89±0.04	Yes
BT_Q_SG_ZJU_Unigene12942	1.2003	2.54±0.12	Yes
BT_Q_SG_ZJU_Unigene13103	1.46289	1.88±0.19	Yes
