# Supplementary material for: Transcriptomic Analysis of the Salivary Glands of an Invasive Whitefly
Source: PLoS One. 2012 Jun 20;7(6):e39303. doi: 10.1371/journal.pone.0039303 (PMC3379992; doi:10.1371/journal.pone.0039303)
Supplement: Table S8 — Primers for qPCR. The primers of the 20 selected unigenes and the reference gene (BT_Q_SG_ZJU_Unigene13122) used for validation of expression level were listed. (XLS) [file pone.0039303.s009.xls]

## Sheet: Sheet1
Genes ID	Forward (5'-3')	Reverse (5'-3')
BT_Q_SG_ZJU_Unigene496	TCAGCATATTCTGGAAGACAAGA	CCAAATTTCAGGGTTGCTATG
BT_Q_SG_ZJU_Unigene1123	GGAAACACATCAAGCTCCCT	CCACAAGCCACTGAAACTGA
BT_Q_SG_ZJU_Unigene1532	GGCATTGAACTCAGCTTTACA	TGAAGAACATGGCTGAGGTC
BT_Q_SG_ZJU_Unigene2647	TTGGAAATCAAACGGCAATA	AGCATGTGGTTCCTTCTGTG
BT_Q_SG_ZJU_Unigene5202	GACCTGTGGTGCACTGAGTAA	GTCGGATGATTCATTGATGC
BT_Q_SG_ZJU_Unigene5624	CGTTCAAGTTGGAAATATACGG	TGGTTGCCATGTGGACTAAT
BT_Q_SG_ZJU_Unigene6526	AATCTGTCTCCGCACGAGTT	CCCGGCTTAGGAAAGAATG
BT_Q_SG_ZJU_Unigene7160	ATGTGACCCGAAATCTCCTC	CTCCGATATTCAAGCAAGCA
BT_Q_SG_ZJU_Unigene8460	GGTGGACTAGCAGATGACCA	CCAATTTCTGCTGCTCTTCA
BT_Q_SG_ZJU_Unigene9390	GGACACCGCACATCTACATT	TCGAGTACAAGACATAACCATCTG
BT_Q_SG_ZJU_Unigene9674	GAACCAGCTAAAGCTGCAAA	ATGTTGCTCTTGTGAAAGCG
BT_Q_SG_ZJU_Unigene10715	TGTTGGTGAGGGAAGTTTCA	TCATCCAGATGGTGTCGAAG
BT_Q_SG_ZJU_Unigene11524	CCAAAGATTGATGCCACTGT	TTTCAGGATGGAGAAGTGGA
BT_Q_SG_ZJU_Unigene11747	GTCGTGTGAGAGGAGCTTGA	GGCTTTCAAACTGTCCTTCC
BT_Q_SG_ZJU_Unigene12156	GTTGAACAAGCGCCTGAATA	TTTCAATCCACGACTTGAGC
BT_Q_SG_ZJU_Unigene12741	CGGTTTGAAATTCCATTGC	ATCAAACCAACAGCACCAAA
BT_Q_SG_ZJU_Unigene12849	ATTGATGCAGGTGGTCGTAA	TGAGAAGGCCAAACACAAAC
BT_Q_SG_ZJU_Unigene12882	GCCAGTTCCTTTGATGGAGT	ATTTCGCCCAAAGTTACCCT
BT_Q_SG_ZJU_Unigene12942	ACGTGCTGTGAACACTATTGC	GGCGACCTATCCCATCTTT
BT_Q_SG_ZJU_Unigene13103	ATTAGCCGAGTTGGAGGAAA	TCGGTGCGATCAGTTGTTAC
BT_Q_SG_ZJU_Unigene13122	TGTGGGACACCCATTATCAG	TGTGCAGCCAAGGAAATAAG
